# Supplementary material
Source: publisher figshare collection journal article supplement (https://acs.figshare.com/ndownloader/files/3807493)
Supplement: Supplementary file 1 [file 3807493]

data_cs2147
_audit_creation_date              2014-10-31
_audit_creation_method
;
Olex2 1.2
(compiled 2014.09.19 svn.r3010 for OlexSys, GUI svn.r4874)
;
_shelxl_version_number            2014/6
_publ_contact_author_address      ?
_publ_contact_author_email        ?
_publ_contact_author_name         ''
_publ_contact_author_phone        ?
_publ_section_references
;
Dolomanov, O.V., Bourhis, L.J., Gildea, R.J, Howard, J.A.K. & Puschmann, H.
 (2009), J. Appl. Cryst. 42, 339-341.

Sheldrick, G.M. (2008). Acta Cryst. A64, 112-122.
;
_chemical_name_common             ?
_chemical_name_systematic         ?
_chemical_formula_moiety          'C19 H24 O5'
_chemical_formula_sum             'C19 H24 O5'
_chemical_formula_weight          332.38
_chemical_absolute_configuration  ad
_chemical_melting_point           ?
_chemical_oxdiff_formula          C19H24O5
_chemical_oxdiff_usercomment      'Yixi Liu / David Kingston (ERXR-3)'
loop_
  _atom_type_symbol
  _atom_type_description
  _atom_type_scat_dispersion_real
  _atom_type_scat_dispersion_imag
  _atom_type_scat_source
 'C' 'C' 0.0181 0.0091 'International Tables Vol C Tables 4.2.6.8 and 6.1.1.4'
 'H' 'H' 0.0000 0.0000 'International Tables Vol C Tables 4.2.6.8 and 6.1.1.4'
 'O' 'O' 0.0492 0.0322 'International Tables Vol C Tables 4.2.6.8 and 6.1.1.4'

_shelx_space_group_comment
;
The symmetry employed for this shelxl refinement is uniquely defined
by the following loop, which should always be used as a source of
symmetry information in preference to the above space-group names.
They are only intended as comments.
;
_space_group_crystal_system       'orthorhombic'
_space_group_IT_number            19
_space_group_name_H-M_alt         'P 21 21 21'
_space_group_name_Hall            'P 2ac 2ab'
loop_
  _space_group_symop_operation_xyz
 'x, y, z'
 '-x+1/2, -y, z+1/2'
 '-x, y+1/2, -z+1/2'
 'x+1/2, -y+1/2, -z'

_cell_length_a                    7.8220(2)
_cell_length_b                    12.4501(4)
_cell_length_c                    17.1803(6)
_cell_angle_alpha                 90
_cell_angle_beta                  90
_cell_angle_gamma                 90
_cell_volume                      1673.11(9)
_cell_formula_units_Z             4
_cell_measurement_reflns_used     5681
_cell_measurement_temperature     100.00(10)
_cell_measurement_theta_max       74.6160
_cell_measurement_theta_min       5.1490
_shelx_estimated_absorpt_T_max    ?
_shelx_estimated_absorpt_T_min    ?
_exptl_absorpt_coefficient_mu     0.776
_exptl_absorpt_correction_T_max   0.971
_exptl_absorpt_correction_T_min   0.879
_exptl_absorpt_correction_type    gaussian
_exptl_absorpt_process_details
;
CrysAlisPro, Agilent Technologies,
Version 1.171.37.34 (release 22-05-2014 CrysAlis171 .NET)
(compiled May 22 2014,16:03:01)
Numerical absorption correction based on gaussian integration over
			a multifaceted crystal model
Empirical absorption correction using spherical harmonics,
 implemented in SCALE3 ABSPACK scaling algorithm.
;
_exptl_absorpt_special_details    ?
_exptl_crystal_colour             colourless
_exptl_crystal_colour_primary     colourless
_exptl_crystal_density_diffrn     1.320
_exptl_crystal_density_meas       ?
_exptl_crystal_density_method     ?
_exptl_crystal_description        plank
_exptl_crystal_F_000              712
_exptl_crystal_recrystallization_method 'Large rods were grown from CH3OH'
_exptl_crystal_size_max           0.2293
_exptl_crystal_size_mid           0.1311
_exptl_crystal_size_min           0.0395
_exptl_transmission_factor_max    ?
_exptl_transmission_factor_min    ?
_diffrn_reflns_av_R_equivalents   0.0476
_diffrn_reflns_av_unetI/netI      0.0478
_diffrn_reflns_Laue_measured_fraction_full 0.999
_diffrn_reflns_Laue_measured_fraction_max 0.998
_diffrn_reflns_limit_h_max        7
_diffrn_reflns_limit_h_min        -9
_diffrn_reflns_limit_k_max        13
_diffrn_reflns_limit_k_min        -15
_diffrn_reflns_limit_l_max        21
_diffrn_reflns_limit_l_min        -21
_diffrn_reflns_number             10392
_diffrn_reflns_point_group_measured_fraction_full 0.999
_diffrn_reflns_point_group_measured_fraction_max 0.993
_diffrn_reflns_theta_full         67.684
_diffrn_reflns_theta_max          74.732
_diffrn_reflns_theta_min          4.386
_diffrn_ambient_environment       N~2~
_diffrn_ambient_temperature       100.00(10)
_diffrn_detector                  'CCD plate'
_diffrn_detector_area_resol_mean  4.1587
_diffrn_detector_type             Onyx
_diffrn_measured_fraction_theta_full 0.999
_diffrn_measured_fraction_theta_max 0.998
_diffrn_measurement_details
;
#__ type_ start__ end____ width___ exp.time_
  1 omega -126.00  -79.00   1.0000    1.0000
omega____ theta____ kappa____ phi______ frames
    -      -41.9419  -99.0000  -60.0000 47

#__ type_ start__ end____ width___ exp.time_
  2 omega  -37.00   76.00   1.0000    1.0000
omega____ theta____ kappa____ phi______ frames
    -       41.9419  -77.0000  -90.0000 113

#__ type_ start__ end____ width___ exp.time_
  3 omega   30.00   69.00   1.0000    3.0000
omega____ theta____ kappa____ phi______ frames
    -      107.0000  -30.0000 -120.0000 39

#__ type_ start__ end____ width___ exp.time_
  4 omega   77.00  178.00   1.0000    3.0000
omega____ theta____ kappa____ phi______ frames
    -      107.0000   30.0000   30.0000 101

#__ type_ start__ end____ width___ exp.time_
  5 omega   30.00   69.00   1.0000    3.0000
omega____ theta____ kappa____ phi______ frames
    -      107.0000  -30.0000 -180.0000 39

#__ type_ start__ end____ width___ exp.time_
  6 omega   33.00  136.00   1.0000    3.0000
omega____ theta____ kappa____ phi______ frames
    -      107.0000  -61.0000   90.0000 103

#__ type_ start__ end____ width___ exp.time_
  7 omega   79.00  178.00   1.0000    3.0000
omega____ theta____ kappa____ phi______ frames
    -      107.0000   45.0000  150.0000 99

#__ type_ start__ end____ width___ exp.time_
  8 omega   33.00   77.00   1.0000    3.0000
omega____ theta____ kappa____ phi______ frames
    -      107.0000  -45.0000    0.0000 44

#__ type_ start__ end____ width___ exp.time_
  9 omega   28.00  141.00   1.0000    3.0000
omega____ theta____ kappa____ phi______ frames
    -      107.0000  -77.0000    0.0000 113

#__ type_ start__ end____ width___ exp.time_
 10 omega   34.00  150.00   1.0000    3.0000
omega____ theta____ kappa____ phi______ frames
    -      107.0000  179.0000   60.0000 116

#__ type_ start__ end____ width___ exp.time_
 11 omega   31.00  107.00   1.0000    3.0000
omega____ theta____ kappa____ phi______ frames
    -      107.0000 -111.0000  -60.0000 76

#__ type_ start__ end____ width___ exp.time_
 12 omega   46.00   74.00   1.0000    3.0000
omega____ theta____ kappa____ phi______ frames
    -      107.0000  -45.0000 -180.0000 28
;
_diffrn_measurement_device        'four-circle diffractometer'
_diffrn_measurement_device_type   'Xcalibur, Onyx, Nova'
_diffrn_measurement_method        '\w scans'
_diffrn_orient_matrix_UB_11       0.1022627000
_diffrn_orient_matrix_UB_12       -0.0446196000
_diffrn_orient_matrix_UB_13       -0.0695665000
_diffrn_orient_matrix_UB_21       0.0697537000
_diffrn_orient_matrix_UB_22       -0.0909779000
_diffrn_orient_matrix_UB_23       0.0517447000
_diffrn_orient_matrix_UB_31       -0.1533131000
_diffrn_orient_matrix_UB_32       -0.0710794000
_diffrn_orient_matrix_UB_33       -0.0226096000
_diffrn_radiation_monochromator   mirror
_diffrn_radiation_probe           x-ray
_diffrn_radiation_type            CuK\a
_diffrn_radiation_wavelength      1.54184
_diffrn_source                    'sealed X-ray tube'
_diffrn_source_type               'Nova (Cu) X-ray Source'
_reflns_Friedel_coverage          0.727
_reflns_Friedel_fraction_full     1.000
_reflns_Friedel_fraction_max      0.986
_reflns_number_gt                 3179
_reflns_number_total              3407
_reflns_special_details
;
 Reflections were merged by SHELXL according to the crystal
 class for the calculation of statistics and refinement.
 
 _reflns_Friedel_fraction is defined as the number of unique
 Friedel pairs measured divided by the number that would be
 possible theoretically, ignoring centric projections and
 systematic absences.
;
_reflns_threshold_expression      'I > 2\s(I)'
_computing_cell_refinement
;
CrysAlisPro, Agilent Technologies,
Version 1.171.37.34 (release 22-05-2014 CrysAlis171 .NET)
(compiled May 22 2014,16:03:01)
;
_computing_data_collection
;
CrysAlisPro, Agilent Technologies,
Version 1.171.37.34 (release 22-05-2014 CrysAlis171 .NET)
(compiled May 22 2014,16:03:01)
;
_computing_data_reduction
;
CrysAlisPro, Agilent Technologies,
Version 1.171.37.34 (release 22-05-2014 CrysAlis171 .NET)
(compiled May 22 2014,16:03:01)
;
_computing_molecular_graphics     'Olex2 (Dolomanov et al., 2009)'
_computing_publication_material   'Olex2 (Dolomanov et al., 2009)'
_computing_structure_refinement   'ShelXL (Sheldrick, 2008)'
_computing_structure_solution     'ShelXT (Sheldrick, 2008)'
_refine_diff_density_max          0.616
_refine_diff_density_min          -0.176
_refine_diff_density_rms          0.047
_refine_ls_abs_structure_details
;
 Flack x determined using 1284 quotients [(I+)-(I-)]/[(I+)+(I-)]
 (Parsons, Flack and Wagner, Acta Cryst. B69 (2013) 249-259).
;
_refine_ls_abs_structure_Flack    -0.07(13)
_refine_ls_extinction_coef        .
_refine_ls_extinction_method      none
_refine_ls_goodness_of_fit_ref    1.042
_refine_ls_hydrogen_treatment     mixed
_refine_ls_matrix_type            full
_refine_ls_number_parameters      225
_refine_ls_number_reflns          3407
_refine_ls_number_restraints      0
_refine_ls_R_factor_all           0.0444
_refine_ls_R_factor_gt            0.0408
_refine_ls_restrained_S_all       1.042
_refine_ls_shift/su_max           0.000
_refine_ls_shift/su_mean          0.000
_refine_ls_structure_factor_coef  Fsqd
_refine_ls_weighting_details
'w=1/[\s^2^(Fo^2^)+(0.0617P)^2^+0.2215P] where P=(Fo^2^+2Fc^2^)/3'
_refine_ls_weighting_scheme       calc
_refine_ls_wR_factor_gt           0.1041
_refine_ls_wR_factor_ref          0.1074
_refine_special_details           ?
_olex2_refinement_description
;
1. Fixed Uiso
 At 1.2 times of:
  All C(H) groups, All C(H,H) groups
 At 1.5 times of:
  All C(H,H,H) groups
2.a Ternary CH refined with riding coordinates:
 C4(H4), C10(H10), C13(H13), C14(H14), C17(H17)
2.b Secondary CH2 refined with riding coordinates:
 C3(H3A,H3B), C5(H5A,H5B)
2.c Aromatic/amide H refined with riding coordinates:
 C8(H8), C12(H12)
2.d Idealised Me refined as rotating group:
 C15(H15A,H15B,H15C), C16(H16A,H16B,H16C), C18(H18A,H18B,H18C), C19(H19A,H19B,
 H19C)
;
_atom_sites_solution_hydrogens    mixed
_atom_sites_solution_primary      direct
_atom_sites_solution_secondary    ?
loop_
  _atom_site_label
  _atom_site_type_symbol
  _atom_site_fract_x
  _atom_site_fract_y
  _atom_site_fract_z
  _atom_site_U_iso_or_equiv
  _atom_site_adp_type
  _atom_site_occupancy
  _atom_site_site_symmetry_order
  _atom_site_calc_flag
  _atom_site_refinement_flags_posn
  _atom_site_refinement_flags_adp
  _atom_site_refinement_flags_occupancy
  _atom_site_disorder_assembly
  _atom_site_disorder_group
 O1 O -0.0669(2) 0.53707(14) 0.38312(10) 0.0242(4) Uani 1 1 d . . . . .
 O2 O -0.1138(2) 0.36697(16) 0.34792(13) 0.0329(4) Uani 1 1 d . . . . .
 O3 O 0.5451(3) 0.28047(15) 0.34295(12) 0.0310(4) Uani 1 1 d . . . . .
 H3 H 0.669(6) 0.311(4) 0.350(3) 0.056(12) Uiso 1 1 d . . . . .
 O4 O 0.7181(2) 0.85934(14) 0.38482(11) 0.0281(4) Uani 1 1 d . . . . .
 O5 O 0.4434(2) 0.89229(13) 0.37174(10) 0.0216(3) Uani 1 1 d . . . . .
 C1 C -0.0223(3) 0.4324(2) 0.37857(15) 0.0249(5) Uani 1 1 d . . . . .
 C2 C 0.1491(3) 0.4123(2) 0.41749(15) 0.0242(5) Uani 1 1 d . . . . .
 C3 C 0.2607(3) 0.33137(19) 0.37330(16) 0.0271(5) Uani 1 1 d . . . . .
 H3A H 0.2435 0.2586 0.3952 0.033 Uiso 1 1 calc R . . . .
 H3B H 0.2266 0.3298 0.3178 0.033 Uiso 1 1 calc R . . . .
 C4 C 0.4471(3) 0.36236(19) 0.37984(15) 0.0247(5) Uani 1 1 d . . . . .
 H4 H 0.4775 0.3620 0.4364 0.030 Uiso 1 1 calc R . . . .
 C5 C 0.4902(3) 0.47426(19) 0.34766(14) 0.0226(5) Uani 1 1 d . . . . .
 H5A H 0.5321 0.4666 0.2936 0.027 Uiso 1 1 calc R . . . .
 H5B H 0.5840 0.5055 0.3790 0.027 Uiso 1 1 calc R . . . .
 C6 C 0.3370(3) 0.55267(18) 0.34821(13) 0.0198(4) Uani 1 1 d . . . . .
 C7 C 0.3858(3) 0.66976(19) 0.35835(12) 0.0195(4) Uani 1 1 d . . . . .
 C8 C 0.5439(3) 0.71013(19) 0.35265(14) 0.0217(4) Uani 1 1 d . . . . .
 H8 H 0.6355 0.6645 0.3376 0.026 Uiso 1 1 calc R . . . .
 C9 C 0.5782(3) 0.82430(19) 0.36929(14) 0.0218(5) Uani 1 1 d . . . . .
 C10 C 0.2763(3) 0.85628(18) 0.34222(13) 0.0203(4) Uani 1 1 d . . . . .
 H10 H 0.2843 0.8535 0.2842 0.024 Uiso 1 1 calc R . . . .
 C11 C 0.2402(3) 0.74366(18) 0.37021(13) 0.0206(4) Uani 1 1 d . . . . .
 C12 C 0.0879(3) 0.7088(2) 0.39526(14) 0.0229(5) Uani 1 1 d . . . . .
 H12 H -0.0078 0.7557 0.3937 0.027 Uiso 1 1 calc R . . . .
 C13 C 0.0665(3) 0.5966(2) 0.42575(14) 0.0221(5) Uani 1 1 d . . . . .
 H13 H 0.0320 0.6010 0.4817 0.027 Uiso 1 1 calc R . . . .
 C14 C 0.2250(3) 0.52621(18) 0.41996(13) 0.0204(4) Uani 1 1 d . . . . .
 H14 H 0.2949 0.5346 0.4683 0.024 Uiso 1 1 calc R . . . .
 C15 C 0.1113(4) 0.3717(2) 0.50065(16) 0.0301(5) Uani 1 1 d . . . . .
 H15A H 0.0538 0.4284 0.5303 0.045 Uiso 1 1 calc GR . . . .
 H15B H 0.2188 0.3526 0.5264 0.045 Uiso 1 1 calc GR . . . .
 H15C H 0.0372 0.3083 0.4980 0.045 Uiso 1 1 calc GR . . . .
 C16 C 0.2431(3) 0.5455(2) 0.26892(13) 0.0242(5) Uani 1 1 d . . . . .
 H16A H 0.3194 0.5701 0.2274 0.036 Uiso 1 1 calc GR . . . .
 H16B H 0.1409 0.5910 0.2702 0.036 Uiso 1 1 calc GR . . . .
 H16C H 0.2094 0.4709 0.2591 0.036 Uiso 1 1 calc GR . . . .
 C17 C 0.1485(3) 0.94378(19) 0.36282(15) 0.0235(5) Uani 1 1 d . . . . .
 H17 H 0.0331 0.9191 0.3452 0.028 Uiso 1 1 calc R . . . .
 C18 C 0.1903(3) 1.0474(2) 0.31888(15) 0.0269(5) Uani 1 1 d . . . . .
 H18A H 0.3023 1.0742 0.3355 0.040 Uiso 1 1 calc GR . . . .
 H18B H 0.1028 1.1016 0.3301 0.040 Uiso 1 1 calc GR . . . .
 H18C H 0.1926 1.0329 0.2628 0.040 Uiso 1 1 calc GR . . . .
 C19 C 0.1379(4) 0.9656(2) 0.45050(16) 0.0326(6) Uani 1 1 d . . . . .
 H19A H 0.1203 0.8978 0.4783 0.049 Uiso 1 1 calc GR . . . .
 H19B H 0.0420 1.0142 0.4611 0.049 Uiso 1 1 calc GR . . . .
 H19C H 0.2445 0.9989 0.4682 0.049 Uiso 1 1 calc GR . . . .

loop_
  _atom_site_aniso_label
  _atom_site_aniso_U_11
  _atom_site_aniso_U_22
  _atom_site_aniso_U_33
  _atom_site_aniso_U_23
  _atom_site_aniso_U_13
  _atom_site_aniso_U_12
 O1 0.0167(8) 0.0237(8) 0.0321(9) -0.0014(7) 0.0008(6) -0.0021(7)
 O2 0.0223(8) 0.0282(9) 0.0481(11) -0.0062(9) 0.0004(8) -0.0053(7)
 O3 0.0259(9) 0.0253(9) 0.0417(10) -0.0044(8) 0.0027(8) 0.0012(7)
 O4 0.0167(8) 0.0238(8) 0.0437(10) -0.0016(8) -0.0012(7) -0.0017(6)
 O5 0.0155(7) 0.0201(8) 0.0292(8) -0.0013(6) -0.0004(6) 0.0002(6)
 C1 0.0194(11) 0.0236(12) 0.0318(11) 0.0001(9) 0.0057(9) -0.0027(9)
 C2 0.0212(12) 0.0210(11) 0.0305(12) 0.0007(9) 0.0023(9) -0.0025(9)
 C3 0.0231(12) 0.0190(10) 0.0393(12) 0.0000(10) 0.0032(10) -0.0013(9)
 C4 0.0202(11) 0.0203(11) 0.0336(12) -0.0006(10) 0.0023(9) 0.0021(9)
 C5 0.0181(10) 0.0204(11) 0.0293(10) -0.0015(9) 0.0015(9) -0.0003(8)
 C6 0.0173(10) 0.0193(10) 0.0228(10) -0.0004(8) 0.0012(9) -0.0001(8)
 C7 0.0196(10) 0.0209(10) 0.0181(10) 0.0008(8) 0.0003(8) 0.0024(8)
 C8 0.0193(10) 0.0197(11) 0.0262(11) 0.0002(8) 0.0014(9) 0.0027(8)
 C9 0.0181(11) 0.0225(11) 0.0249(10) 0.0016(9) 0.0030(8) 0.0002(9)
 C10 0.0167(10) 0.0200(10) 0.0243(10) -0.0002(9) -0.0009(8) -0.0002(8)
 C11 0.0177(10) 0.0201(11) 0.0239(10) -0.0003(8) 0.0002(9) 0.0015(8)
 C12 0.0185(11) 0.0223(11) 0.0279(11) -0.0008(9) -0.0004(8) 0.0029(9)
 C13 0.0171(11) 0.0235(12) 0.0256(11) -0.0005(9) 0.0014(8) -0.0023(9)
 C14 0.0186(10) 0.0190(11) 0.0234(10) -0.0003(8) 0.0013(8) -0.0014(9)
 C15 0.0289(12) 0.0256(12) 0.0359(13) 0.0068(11) 0.0069(10) -0.0001(10)
 C16 0.0218(11) 0.0260(11) 0.0248(10) -0.0025(9) 0.0009(9) -0.0026(9)
 C17 0.0172(10) 0.0202(11) 0.0330(12) -0.0012(9) -0.0005(9) 0.0011(8)
 C18 0.0224(11) 0.0204(11) 0.0379(13) 0.0002(10) -0.0038(10) 0.0005(9)
 C19 0.0304(14) 0.0298(13) 0.0376(13) -0.0058(11) 0.0113(11) 0.0014(11)

_geom_special_details
;
 All esds (except the esd in the dihedral angle between two l.s. planes)
 are estimated using the full covariance matrix.  The cell esds are taken
 into account individually in the estimation of esds in distances, angles
 and torsion angles; correlations between esds in cell parameters are only
 used when they are defined by crystal symmetry.  An approximate (isotropic)
 treatment of cell esds is used for estimating esds involving l.s. planes.
;
loop_
  _geom_bond_atom_site_label_1
  _geom_bond_atom_site_label_2
  _geom_bond_distance
  _geom_bond_site_symmetry_2
  _geom_bond_publ_flag
 O1 C1 1.351(3) . ?
 O1 C13 1.475(3) . ?
 O2 C1 1.206(3) . ?
 O3 C4 1.424(3) . ?
 O4 C9 1.208(3) . ?
 O5 C9 1.353(3) . ?
 O5 C10 1.472(3) . ?
 C1 C2 1.519(4) . ?
 C2 C3 1.534(4) . ?
 C2 C14 1.538(3) . ?
 C2 C15 1.544(3) . ?
 C3 C4 1.512(3) . ?
 C4 C5 1.536(3) . ?
 C5 C6 1.546(3) . ?
 C6 C7 1.517(3) . ?
 C6 C14 1.548(3) . ?
 C6 C16 1.550(3) . ?
 C7 C8 1.338(3) . ?
 C7 C11 1.479(3) . ?
 C8 C9 1.474(3) . ?
 C10 C11 1.509(3) . ?
 C10 C17 1.520(3) . ?
 C11 C12 1.339(3) . ?
 C12 C13 1.501(3) . ?
 C13 C14 1.522(3) . ?
 C17 C18 1.530(3) . ?
 C17 C19 1.533(4) . ?

loop_
  _geom_angle_atom_site_label_1
  _geom_angle_atom_site_label_2
  _geom_angle_atom_site_label_3
  _geom_angle
  _geom_angle_site_symmetry_1
  _geom_angle_site_symmetry_3
  _geom_angle_publ_flag
 C1 O1 C13 109.29(18) . . ?
 C9 O5 C10 119.39(18) . . ?
 O1 C1 C2 111.2(2) . . ?
 O2 C1 O1 121.6(2) . . ?
 O2 C1 C2 127.2(2) . . ?
 C1 C2 C3 113.1(2) . . ?
 C1 C2 C14 101.6(2) . . ?
 C1 C2 C15 107.0(2) . . ?
 C3 C2 C14 113.6(2) . . ?
 C3 C2 C15 110.6(2) . . ?
 C14 C2 C15 110.5(2) . . ?
 C4 C3 C2 110.1(2) . . ?
 O3 C4 C3 107.7(2) . . ?
 O3 C4 C5 111.8(2) . . ?
 C3 C4 C5 114.6(2) . . ?
 C4 C5 C6 113.60(19) . . ?
 C5 C6 C14 108.01(18) . . ?
 C5 C6 C16 109.02(19) . . ?
 C7 C6 C5 114.36(19) . . ?
 C7 C6 C14 104.80(18) . . ?
 C7 C6 C16 105.99(19) . . ?
 C14 C6 C16 114.78(19) . . ?
 C8 C7 C6 125.8(2) . . ?
 C8 C7 C11 119.2(2) . . ?
 C11 C7 C6 114.8(2) . . ?
 C7 C8 C9 121.1(2) . . ?
 O4 C9 O5 118.2(2) . . ?
 O4 C9 C8 123.8(2) . . ?
 O5 C9 C8 117.9(2) . . ?
 O5 C10 C11 109.84(17) . . ?
 O5 C10 C17 106.59(18) . . ?
 C11 C10 C17 117.95(19) . . ?
 C7 C11 C10 113.0(2) . . ?
 C12 C11 C7 121.9(2) . . ?
 C12 C11 C10 124.8(2) . . ?
 C11 C12 C13 120.9(2) . . ?
 O1 C13 C12 111.9(2) . . ?
 O1 C13 C14 104.76(18) . . ?
 C12 C13 C14 114.96(19) . . ?
 C2 C14 C6 113.12(19) . . ?
 C13 C14 C2 102.62(18) . . ?
 C13 C14 C6 113.00(19) . . ?
 C10 C17 C18 110.4(2) . . ?
 C10 C17 C19 113.0(2) . . ?
 C18 C17 C19 110.3(2) . . ?

loop_
  _geom_hbond_atom_site_label_D
  _geom_hbond_atom_site_label_H
  _geom_hbond_atom_site_label_A
  _geom_hbond_distance_DH
  _geom_hbond_distance_HA
  _geom_hbond_distance_DA
  _geom_hbond_angle_DHA
  _geom_hbond_site_symmetry_A
 O3 H3 O2 1.05(5) 1.83(5) 2.878(3) 173(4) 1_655

loop_
  _exptl_crystal_face_index_h
  _exptl_crystal_face_index_k
  _exptl_crystal_face_index_l
  _exptl_crystal_face_perp_dist
  _exptl_oxdiff_crystal_face_indexfrac_h
  _exptl_oxdiff_crystal_face_indexfrac_k
  _exptl_oxdiff_crystal_face_indexfrac_l
  _exptl_oxdiff_crystal_face_x
  _exptl_oxdiff_crystal_face_y
  _exptl_oxdiff_crystal_face_z
 0 1 -1 0.0197 -0.0000 1.0000 -1.0000 0.0249 -0.1427 -0.0485
 0 -1 1 0.0197 0.0000 -1.0000 1.0000 -0.0249 0.1427 0.0485
 1 0 0 0.1145 1.0000 0.0002 -0.0001 0.1023 0.0697 -0.1533
 -1 0 0 0.1145 -1.0000 -0.0002 0.0001 -0.1023 -0.0697 0.1533
 0 -1 -1 0.0561 0.0000 -1.0001 -1.0000 0.1142 0.0392 0.0937
 0 1 1 0.0561 -0.0000 1.0001 1.0000 -0.1142 -0.0392 -0.0937

_iucr_refine_instructions_details
;
TITL cs2147 in P212121 #19
CELL 1.54184 7.822037 12.450143 17.180284 90 90 90
ZERR 4 0.000237 0.000398 0.000567 0 0 0
LATT -1
SYMM 0.5-X,-Y,0.5+Z
SYMM -X,0.5+Y,0.5-Z
SYMM 0.5+X,0.5-Y,-Z
 
SFAC C H O
UNIT 76 96 20
EQIV $1 1+X,+Y,+Z
 
L.S. 10
PLAN  10
TEMP -173
HTAB O3 O2_$1
MORE -1
LIST 6
fmap 2
acta
REM <HKL>C:/Users/Carla/Documents/Xray/cs2147/refine/cs2147.hkl</HKL>
 
WGHT    0.061700    0.221500
FVAR       8.36834
O1    3   -0.066944    0.537066    0.383124    11.00000    0.01671    0.02366 =
         0.03213   -0.00138    0.00080   -0.00211
O2    3   -0.113827    0.366972    0.347925    11.00000    0.02233    0.02822 =
         0.04808   -0.00624    0.00039   -0.00528
O3    3    0.545087    0.280468    0.342953    11.00000    0.02591    0.02532 =
         0.04170   -0.00442    0.00268    0.00119
H3    2    0.669481    0.310800    0.349688    11.00000    0.05609
O4    3    0.718130    0.859335    0.384825    11.00000    0.01675    0.02382 =
         0.04369   -0.00157   -0.00123   -0.00166
O5    3    0.443408    0.892293    0.371739    11.00000    0.01554    0.02005 =
         0.02921   -0.00129   -0.00042    0.00018
C1    1   -0.022282    0.432442    0.378574    11.00000    0.01938    0.02359 =
         0.03180    0.00012    0.00567   -0.00273
C2    1    0.149148    0.412295    0.417489    11.00000    0.02124    0.02099 =
         0.03051    0.00073    0.00226   -0.00250
C3    1    0.260663    0.331367    0.373299    11.00000    0.02306    0.01900 =
         0.03928    0.00003    0.00320   -0.00130
AFIX  23
H3A   2    0.243491    0.258601    0.395180    11.00000   -1.20000
H3B   2    0.226576    0.329842    0.317815    11.00000   -1.20000
AFIX   0
C4    1    0.447072    0.362357    0.379837    11.00000    0.02022    0.02032 =
         0.03362   -0.00065    0.00228    0.00213
AFIX  13
H4    2    0.477542    0.362028    0.436365    11.00000   -1.20000
AFIX   0
C5    1    0.490205    0.474260    0.347657    11.00000    0.01808    0.02042 =
         0.02928   -0.00148    0.00154   -0.00034
AFIX  23
H5A   2    0.532064    0.466594    0.293560    11.00000   -1.20000
H5B   2    0.583993    0.505500    0.379037    11.00000   -1.20000
AFIX   0
C6    1    0.337027    0.552668    0.348205    11.00000    0.01733    0.01930 =
         0.02278   -0.00040    0.00121   -0.00007
C7    1    0.385849    0.669755    0.358350    11.00000    0.01956    0.02087 =
         0.01815    0.00077    0.00026    0.00245
C8    1    0.543917    0.710135    0.352649    11.00000    0.01932    0.01974 =
         0.02617    0.00023    0.00140    0.00272
AFIX  43
H8    2    0.635507    0.664507    0.337635    11.00000   -1.20000
AFIX   0
C9    1    0.578195    0.824297    0.369295    11.00000    0.01815    0.02249 =
         0.02488    0.00157    0.00296    0.00017
C10   1    0.276287    0.856281    0.342220    11.00000    0.01672    0.02000 =
         0.02427   -0.00021   -0.00085   -0.00017
AFIX  13
H10   2    0.284344    0.853549    0.284163    11.00000   -1.20000
AFIX   0
C11   1    0.240207    0.743661    0.370206    11.00000    0.01770    0.02008 =
         0.02390   -0.00025    0.00016    0.00149
C12   1    0.087927    0.708781    0.395256    11.00000    0.01853    0.02231 =
         0.02791   -0.00078   -0.00045    0.00286
AFIX  43
H12   2   -0.007847    0.755655    0.393709    11.00000   -1.20000
AFIX   0
C13   1    0.066505    0.596600    0.425753    11.00000    0.01714    0.02353 =
         0.02564   -0.00053    0.00144   -0.00229
AFIX  13
H13   2    0.032042    0.601032    0.481712    11.00000   -1.20000
AFIX   0
C14   1    0.225026    0.526214    0.419959    11.00000    0.01861    0.01904 =
         0.02344   -0.00027    0.00126   -0.00136
AFIX  13
H14   2    0.294861    0.534634    0.468331    11.00000   -1.20000
AFIX   0
C15   1    0.111286    0.371693    0.500647    11.00000    0.02892    0.02556 =
         0.03585    0.00683    0.00695   -0.00005
AFIX 137
H15A  2    0.053836    0.428408    0.530318    11.00000   -1.50000
H15B  2    0.218806    0.352571    0.526442    11.00000   -1.50000
H15C  2    0.037187    0.308330    0.497957    11.00000   -1.50000
AFIX   0
C16   1    0.243063    0.545511    0.268922    11.00000    0.02181    0.02598 =
         0.02477   -0.00254    0.00093   -0.00257
AFIX 137
H16A  2    0.319448    0.570051    0.227352    11.00000   -1.50000
H16B  2    0.140908    0.591046    0.270219    11.00000   -1.50000
H16C  2    0.209437    0.470912    0.259079    11.00000   -1.50000
AFIX   0
C17   1    0.148470    0.943782    0.362821    11.00000    0.01722    0.02022 =
         0.03301   -0.00118   -0.00046    0.00106
AFIX  13
H17   2    0.033114    0.919104    0.345223    11.00000   -1.20000
AFIX   0
C18   1    0.190293    1.047428    0.318884    11.00000    0.02244    0.02040 =
         0.03793    0.00016   -0.00384    0.00053
AFIX 137
H18A  2    0.302313    1.074151    0.335544    11.00000   -1.50000
H18B  2    0.102782    1.101572    0.330143    11.00000   -1.50000
H18C  2    0.192566    1.032932    0.262827    11.00000   -1.50000
AFIX   0
C19   1    0.137866    0.965640    0.450498    11.00000    0.03038    0.02982 =
         0.03755   -0.00576    0.01133    0.00142
AFIX 137
H19A  2    0.120286    0.897794    0.478290    11.00000   -1.50000
H19B  2    0.041985    1.014152    0.461093    11.00000   -1.50000
H19C  2    0.244548    0.998948    0.468162    11.00000   -1.50000
AFIX   0
HKLF 4
 
REM  cs2147 in P212121 #19
REM R1 =  0.0408 for    3179 Fo > 4sig(Fo)  and  0.0444 for all    3407 data
REM    225 parameters refined using      0 restraints
 
END  
     
WGHT      0.0617      0.2215 

REM Highest difference peak  0.616,  deepest hole -0.176,  1-sigma level  0.047
Q1    1  -0.0377  1.0366  0.4333  11.00000  0.05    0.62
Q2    1   0.2211  0.7608  0.4627  11.00000  0.05    0.23
Q3    1   0.4193  0.5151  0.3433  11.00000  0.05    0.21
Q4    1   0.1842  0.4707  0.4203  11.00000  0.05    0.21
Q5    1   0.2535  0.7948  0.3556  11.00000  0.05    0.21
Q6    1   0.0740  0.6509  0.4122  11.00000  0.05    0.20
Q7    1   0.5595  0.7573  0.3560  11.00000  0.05    0.19
Q8    1   0.3029  0.7118  0.3693  11.00000  0.05    0.18
Q9    1   0.2131  0.9022  0.3600  11.00000  0.05    0.18
Q10   1   0.2642  0.5326  0.3816  11.00000  0.05    0.18

REM The information below was added by Olex2.
REM
REM R1 = 0.0408 for 3179 Fo > 4sig(Fo) and 0.0444 for all 10424 data
REM n/a parameters refined using n/a restraints
REM Highest difference peak 0.62, deepest hole -0.18
REM Mean Shift 0, Max Shift 0.000.

REM +++ Tabular Listing of Refinement Information +++
REM R1_all = 0.0444
REM R1_gt = 0.0408
REM wR_ref = 0.1074
REM GOOF = 1.042
REM Shift_max = 0.000
REM Shift_mean = 0
REM Reflections_all = 10424
REM Reflections_gt = 3179
REM Parameters = n/a
REM Hole = -0.18
REM Peak = 0.62
REM Flack = -0.07(13)

;
_olex2_exptl_crystal_mounting_method
'A rod was cut into a plank and mounted with Krytox oil'
_olex2_submission_original_sample_id ERXR-3
_olex2_submission_special_instructions 'No special instructions were received'
loop_
  _refln_index_h
  _refln_index_k
  _refln_index_l
  _refln_F_squared_meas
  _refln_F_squared_sigma
  _refln_scale_group_code
 0 0 -2 1890.47 243.554 2
 0 0 -3 7.47785 165.781 2
 0 0 -5 1229.7 339.615 2
 0 0 -6 227063 7237.89 2
 0 0 -7 39.2431 294.412 2
 0 0 -8 999999 28037.9 2
 0 0 -9 295.341 371.299 2
 0 0 -10 204736 7481.12 2
 0 0 -11 300.368 467.326 2
 0 0 -12 19683.7 1277.45 10
 0 0 -12 18404.3 1233.61 3
 0 0 -13 -15.0769 226.249 10
 0 0 -13 -47.9277 189.301 7
 0 0 -13 127.976 292.887 3
 0 0 -14 68806.9 2932.42 10
 0 0 -14 63271.2 2820.15 3
 0 0 -14 66006.7 2811.27 7
 0 0 -15 -366.15 212.11 7
 0 0 -15 -13.7356 324.705 10
 0 0 -15 -97.9777 313.548 3
 0 0 -16 4360.94 620.483 7
 0 0 -16 4923.96 739.716 10
 0 0 -16 5373.28 761.482 3
 0 0 -17 141.292 221.108 7
 0 0 -17 193.184 303.378 10
 0 0 -17 410.684 372.119 3
 0 0 -18 186.526 175.027 7
 0 0 -18 757.525 341.771 3
 0 0 -18 733.164 388.759 10
 0 0 -19 15.6615 279.472 10
 0 0 -20 3041.61 446.614 10
 0 0 -21 18.6996 167.856 10
 0 -1 0 192.196 107.565 1
 0 -1 -1 167312 4853.15 2
 0 1 -2 624379 17087.7 2
 0 -1 -2 641312 17203.4 2
 0 -1 -3 223850 6727.49 2
 0 1 -3 226035 6587.64 2
 0 1 -4 11883.7 827.479 2
 0 -1 -4 9238.08 817.36 2
 0 1 -5 309348 9351.44 2
 0 -1 -5 326582 9577.27 2
 0 1 -6 140440 4814.51 2
 0 -1 -6 133484 4903.95 2
 0 1 -7 16272.8 1284.41 2
 0 -1 -7 17164.4 1396.88 2
 0 1 -8 59224 2862 2
 0 -1 -8 54183.6 2909.42 2
 0 -1 -9 44481.9 2626.4 2
 0 1 -9 38488.5 2365.02 2
 0 1 -10 1595.93 533.257 2
 0 -1 -10 1307.71 514.797 2
 0 -1 -11 71104.7 3882.88 2
 0 1 -12 27477.5 1536.96 3
 0 -1 -12 27568.8 1529.61 3
 0 1 -12 26446.1 1529.49 10
 0 -1 -12 25452.6 1491.95 10
 0 -1 -13 4405.29 625.149 10
 0 -1 -13 4619.81 646.438 3
 0 1 -13 5418.71 686.742 7
 0 -1 -13 3946.81 570.3 7
 0 1 -13 5796.97 673.735 3
 0 1 -13 4030.39 617.703 10
 0 -1 -14 40384.6 2079.79 3
 0 1 -14 40917.5 2128.57 3
 0 -1 -14 42236.9 2063.52 7
 0 1 -14 42199.6 2152.05 10
 0 1 -14 42060.5 2090.58 7
 0 -1 -14 39487.8 2096.3 10
 0 -1 -15 4339.89 689.182 10
 0 -1 -15 4783.13 631.105 7
 0 1 -15 4740.54 700.532 10
 0 1 -15 6330.62 792.136 3
 0 -1 -15 4963.94 729.257 3
 0 1 -15 3603.51 552.583 7
 0 1 -16 6438.97 816.27 3
 0 -1 -16 7269.13 784.509 7
 0 -1 -16 7003.38 857.377 3
 0 1 -16 7215.38 803.249 7
 0 1 -16 6848.12 842.362 10
 0 -1 -16 7643.99 892.852 10
 0 -1 -17 2179.59 521.247 10
 0 1 -17 1936.99 428.341 7
 0 1 -17 1954.2 525.865 3
 0 -1 -17 2391.92 471.406 7
 0 -1 -17 1831.62 515.064 3
 0 1 -17 2069.9 512.976 10
 0 1 -18 264.801 342.035 10
 0 1 -18 104.575 289.771 3
 0 -1 -18 83.3458 302.719 10
 0 -1 -18 116.677 119.513 7
 0 1 -18 629.966 223.006 7
 0 -1 -19 4038.94 565.209 10
 0 1 -19 3360.69 532.579 10
 0 -1 -20 211.378 241.917 10
 0 1 -20 240.819 238.516 10
 0 1 -21 1413.71 264.034 10
 0 -1 -21 819.992 238.224 10
 0 -2 0 337177 9703.81 1
 0 -2 -1 409112 11518.8 1
 0 -2 1 398846 11484.8 1
 0 -2 -2 4450.63 551.542 2
 0 2 -3 481241 13323.2 2
 0 -2 -3 459692 13452.1 2
 0 -2 -4 109317 4064.28 2
 0 2 -4 112111 3910.81 2
 0 -2 -5 583835 16526.5 2
 0 2 -5 562585 16201 2
 0 -2 -6 109612 4434.23 2
 0 2 -6 115796 4245.9 2
 0 -2 -7 68413.4 3288.43 2
 0 2 -7 65273.8 3020.19 2
 0 2 -8 57866 2885.17 2
 0 -2 -8 52679 2977.97 2
 0 2 -9 151563 5655.54 2
 0 -2 -9 137510 5837.9 2
 0 -2 -10 151.245 400.949 2
 0 -2 -11 18696.7 1873.46 2
 0 -2 -12 2684.15 444.915 10
 0 2 -12 2364.65 459.539 3
 0 -2 -12 2584.48 479.15 3
 0 -2 -12 1381.13 839.799 2
 0 2 -12 2442.89 481.449 10
 0 2 -13 32113.9 1760.13 7
 0 2 -13 32335.5 1744.54 10
 0 -2 -13 29745.7 1641.84 7
 0 2 -13 32286.8 1767.69 3
 0 -2 -13 28479.2 1661.37 10
 0 -2 -13 28067.4 1642.71 3
 0 -2 -14 322.358 294.175 3
 0 -2 -14 781.764 392.986 10
 0 2 -14 -103.744 280.09 7
 0 2 -14 994.929 358.442 10
 0 2 -14 615.041 395.552 3
 0 -2 -14 418.809 203.496 7
 0 -2 -15 8879.36 865.134 7
 0 -2 -15 7700.27 885.856 10
 0 2 -15 9355.19 935.68 10
 0 -2 -15 9493.85 962.07 3
 0 2 -15 9444.46 965.453 3
 0 2 -15 9417.21 930.099 7
 0 -2 -16 319.713 349.882 3
 0 -2 -16 135.882 233.606 7
 0 2 -16 324.465 281.03 7
 0 -2 -16 417.331 408.96 10
 0 2 -16 290.953 339.334 3
 0 2 -16 590.974 405.706 10
 0 2 -17 305.191 304.506 10
 0 2 -17 -121.64 207.52 7
 0 -2 -17 443.057 353.929 10
 0 -2 -17 148.87 208.038 7
 0 2 -17 141.36 353.547 3
 0 -2 -18 206.515 297.661 10
 0 2 -18 143.514 306.154 3
 0 -2 -18 259.971 268.505 7
 0 2 -18 291.524 280.631 10
 0 2 -18 344.686 164.14 7
 0 -2 -19 2723.93 497.993 10
 0 2 -19 2474.44 438.929 10
 0 2 -19 3002.07 482.661 3
 0 -2 -20 3970.9 478.622 10
 0 2 -20 4298.83 491.752 10
 0 2 -21 432.355 185.276 10
 0 2 21 504.091 171.297 4
 0 -2 -21 306.113 165.319 10
 0 -3 0 211.446 323.779 1
 0 -3 1 5981.27 755.031 1
 0 -3 -1 5116.86 741.225 1
 0 -3 -2 8284.9 912.556 1
 0 -3 2 9279.11 930.044 1
 0 -3 -3 1672.59 490.297 2
 0 -3 3 2075.97 509.625 1
 0 3 -4 4981.5 704.485 2
 0 -3 -4 6183.57 835.449 2
 0 3 -5 6175.88 805.394 2
 0 -3 -5 8478.92 1013.49 2
 0 3 -6 10931.1 1096.74 2
 0 -3 -6 10821.5 1210.02 2
 0 3 -7 1032.68 426.81 2
 0 -3 -7 1151.82 600.764 2
 0 3 -8 93494.7 4044.72 2
 0 -3 -8 91514.5 4431.65 2
 0 -3 -9 1494.12 649.221 2
 0 3 -9 3164.05 677.398 2
 0 -3 -10 15584.5 1766.3 2
 0 -3 -11 26166 2445.33 2
 0 3 -12 4128.41 613.309 7
 0 -3 -12 5922.14 672.312 10
 0 3 -12 4142.61 568.637 10
 0 -3 -12 3794.66 551.464 7
 0 -3 -12 4448.15 617.582 3
 0 3 -12 4444.42 653.095 3
 0 3 -13 5394.36 694.095 3
 0 -3 -13 4925.64 683.401 3
 0 3 -13 5172.87 733.515 7
 0 -3 -13 5416.72 675.316 10
 0 -3 -13 4830.24 604.93 7
 0 3 -13 4362.56 641.727 10
 0 -3 -14 769.54 330.917 10
 0 3 -14 543.687 279.95 7
 0 -3 -14 1207.83 404.402 7
 0 3 -14 1151.55 428.771 3
 0 3 -14 1119.29 405.551 10
 0 -3 -14 1420.04 409.791 3
 0 3 -15 632.569 267.587 7
 0 3 -15 475.443 300.718 10
 0 -3 -15 -144.52 212.59 7
 0 -3 -15 781.712 418.8 10
 0 3 -15 440.836 342.759 3
 0 3 -16 260.532 328.266 10
 0 3 -16 903.126 384.591 7
 0 3 -16 1000.63 370.264 3
 0 -3 -16 873.827 420.717 10
 0 -3 -16 348.602 273.06 7
 0 -3 -17 -143.846 196.262 7
 0 3 -17 137.687 261.412 3
 0 3 -17 425.2 319.479 10
 0 3 -17 -337.476 224.653 7
 0 -3 -17 583.671 374.896 10
 0 -3 -18 3900.82 587.955 10
 0 3 -18 2787.24 420.491 7
 0 -3 -18 3508.63 491.153 7
 0 3 -18 2871.23 500.625 3
 0 3 -18 2736.92 468.973 10
 0 3 -19 -673.253 284.885 3
 0 3 -19 180.411 199.8 10
 0 -3 -19 16.4784 243.14 10
 0 -3 -20 1540.99 327.711 10
 0 3 20 2033.91 371.32 4
 0 3 -20 2288.34 329.786 10
 0 3 21 572.766 183.534 4
 0 -4 0 86231.4 3811.79 1
 0 -4 1 152943 5563.72 1
 0 -4 -1 139256 5516.71 1
 0 -4 -2 23310.3 1797.91 1
 0 -4 2 25787.1 1793.71 1
 0 -4 3 17456.4 1485.83 1
 0 -4 4 35189.4 2213.52 1
 0 4 -5 900.4 409.11 2
 0 -4 5 431.768 345.545 1
 0 -4 6 16650.4 1589.85 1
 0 4 -6 17580.9 1489.35 2
 0 -4 7 814.689 519.264 1
 0 -4 -7 1033.06 518.278 2
 0 4 -7 540.623 382.711 2
 0 4 -8 67947.1 3393.63 2
 0 -4 -8 61900 3733.49 2
 0 -4 8 60497.9 3553.25 1
 0 -4 9 1913.27 690.996 1
 0 -4 10 8298.54 1365.36 1
 0 -4 11 1146.34 623.039 1
 0 -4 -11 1822.51 388.164 3
 0 -4 -11 953.841 307.155 10
 0 4 -12 -79.5092 227.137 10
 0 -4 12 601.57 292.194 9
 0 -4 -12 168.136 238.488 10
 0 4 -12 880.947 365.368 3
 0 -4 -12 723.531 291.069 7
 0 4 -13 7817.94 878.851 7
 0 4 -13 8081.68 880.657 3
 0 -4 -13 7985.37 822.135 7
 0 4 -13 9153.13 869.638 10
 0 -4 -13 9396.19 908.09 10
 0 -4 -14 5417.96 728.051 10
 0 4 -14 4747.64 633.611 10
 0 4 -14 6077.12 767.329 3
 0 -4 -14 5102.92 681.992 7
 0 4 -14 6072.57 802.086 7
 0 -4 -15 829.469 297.163 7
 0 4 -15 1032.79 396.53 3
 0 4 -15 929.484 379.135 7
 0 4 -15 998.575 336.631 10
 0 -4 -15 734.824 357.985 10
 0 4 -16 9365.98 897.848 7
 0 -4 -16 9886.85 883.162 7
 0 4 -16 8671.38 828.542 10
 0 -4 -16 9896.58 935.627 10
 0 4 -16 9248.35 899.805 3
 0 4 -17 -77.2599 215.062 10
 0 -4 -17 170.933 304.745 10
 0 4 -17 159.4 234.478 7
 0 -4 -17 102.953 196.246 7
 0 4 -17 229.3 293.411 3
 0 4 -18 150.98 144.944 10
 0 4 -18 -233.612 245.245 7
 0 4 -18 581.492 250.494 3
 0 -4 -18 282.157 256.4 10
 0 4 19 16855.2 1071.01 4
 0 4 -19 15723.6 916.796 10
 0 -4 -19 17264.8 1035.56 10
 0 4 -19 16183.8 931.984 3
 0 -4 -20 1727.11 293.945 9
 0 4 20 1513.21 299.417 4
 0 -4 -20 2005.24 300.297 10
 0 -5 0 128.239 399.177 1
 0 -5 1 109482 4847.17 1
 0 -5 -1 104047 4836.88 1
 0 -5 2 288718 9866.94 1
 0 -5 -2 287552 10017 1
 0 -5 3 20175.1 1806.26 1
 0 -5 4 108673 4913.56 1
 0 -5 5 15091.7 1636.3 1
 0 5 -5 16468.3 1552.22 2
 0 5 -6 188654 7165.18 2
 0 -5 6 193982 7525.65 1
 0 5 -7 3808.65 811.953 2
 0 -5 7 3944.69 965.532 1
 0 -5 8 30776.6 2578.3 1
 0 -5 9 24588.5 2362.55 1
 0 -5 10 35906.2 3014.23 1
 0 -5 11 20953.6 1424.35 9
 0 -5 -11 21571.8 1340.76 7
 0 -5 -11 20023.7 1284.91 10
 0 -5 -12 1033.74 303.581 7
 0 -5 12 1839.56 448.781 9
 0 -5 -12 267.375 287.57 10
 0 5 -13 1697.36 436.233 7
 0 -5 -13 1430.14 360.731 10
 0 -5 -13 967.262 347.89 7
 0 5 -13 1901.98 367.914 10
 0 5 -13 1200.5 421.864 3
 0 5 -14 405.023 187.048 10
 0 5 -14 687.362 335.885 3
 0 -5 -14 475.013 288.026 10
 0 5 -14 680.469 382.789 7
 0 -5 -14 890.303 333.691 7
 0 -5 -15 4342.23 602.151 7
 0 -5 -15 4039.02 591.091 10
 0 5 -15 3619.67 527.379 10
 0 5 -15 3791.54 620.381 7
 0 5 -15 3946.62 607.526 3
 0 -5 -16 31.8565 265.593 7
 0 5 -16 96.0956 241.628 7
 0 5 -16 -53.9654 195.704 10
 0 5 -16 69.4324 277.378 3
 0 -5 -16 128.241 261.676 10
 0 5 -17 1745.04 374.645 3
 0 -5 -17 2485.39 476.492 10
 0 5 -17 1698 362.438 7
 0 5 -17 1116.83 312.004 10
 0 -5 -17 2432.21 412.633 7
 0 5 -18 2429.09 391.418 7
 0 5 18 3709.98 538.33 4
 0 -5 -18 2921.13 454.405 10
 0 5 -18 3131.45 415.068 3
 0 5 19 698.989 249.043 4
 0 -5 -19 901.448 231.923 10
 0 5 20 329.775 157.019 4
 0 -5 -20 152.951 135.698 9
 0 -6 0 2239.3 764.233 1
 0 -6 1 373131 12787.9 1
 0 -6 -1 368597 12853.9 1
 0 -6 2 398.97 489.376 1
 0 -6 3 94720.1 4805.88 1
 0 -6 4 4993.19 1048.41 1
 0 6 -5 101698 4807.49 2
 0 -6 5 99279.5 5086.24 1
 0 6 -6 16476.6 1704.48 2
 0 -6 6 19387.1 2086.37 1
 0 6 -7 105339 4992.71 2
 0 -6 7 107688 5570.66 1
 0 -6 8 10992.7 1658.63 1
 0 -6 -9 6038.95 699.755 7
 0 -6 9 3696.64 974.402 1
 0 -6 10 2927.42 547.618 9
 0 -6 -10 2351.75 444.924 7
 0 -6 10 1720.36 878.586 1
 0 -6 11 11935.1 1063.37 9
 0 -6 -11 10103.6 931.505 7
 0 -6 12 3845.44 654.712 9
 0 -6 -12 3312.35 541.144 7
 0 -6 -12 4123.93 589.259 10
 0 -6 -13 1435.15 426.797 7
 0 -6 -13 909.764 390.971 10
 0 6 -13 2001.81 450.558 3
 0 6 -14 6.01631 201.642 3
 0 6 -14 206.289 296.228 7
 0 -6 -14 110.532 288.603 10
 0 -6 -14 608.668 319.464 7
 0 6 -15 935.293 332.227 7
 0 -6 -15 1370.05 328.51 10
 0 6 -15 1382.56 390.473 3
 0 -6 -15 681.433 332.514 7
 0 6 -16 474.579 293.042 7
 0 -6 -16 -153.438 206.091 10
 0 6 -16 361.639 271.736 3
 0 -6 -16 655.274 248.823 7
 0 6 16 46.7676 266.538 4
 0 -6 -17 476.264 274.782 10
 0 -6 -17 305.237 198.104 7
 0 6 17 698.247 296.781 4
 0 6 -17 948.7 249.096 7
 0 6 18 1047.64 305.343 4
 0 -6 -18 1751.96 353.952 9
 0 -6 -18 808.159 269.156 10
 0 -6 -19 2944.84 377.104 9
 0 6 19 2314.55 333.782 4
 0 -7 0 180.455 585.886 1
 0 -7 -1 40677.7 3360.98 1
 0 -7 1 40225.8 3254 1
 0 -7 2 76147.6 4583.43 1
 0 -7 3 505.745 537.664 1
 0 -7 4 2142.1 856.141 1
 0 7 -5 5919.11 1191.42 2
 0 -7 5 6621.04 1342.59 1
 0 7 -6 11548.4 1585.96 2
 0 -7 6 14148.3 1960.59 1
 0 -7 7 -73.524 769.583 1
 0 7 8 2977.23 481.857 4
 0 -7 -8 3376.87 559.065 7
 0 -7 8 3088.03 1058.3 1
 0 -7 9 -1548.08 919.644 1
 0 -7 9 203.47 326.129 9
 0 -7 -9 191.061 287.128 7
 0 7 9 428.656 258.591 4
 0 -7 -10 275.51 260.957 7
 0 7 10 527.798 283.015 4
 0 -7 10 471.847 713.589 1
 0 -7 10 956.988 325.749 9
 0 -7 11 2534.47 481.867 9
 0 -7 -11 3205.82 582.332 7
 0 7 11 1673.83 496.124 4
 0 -7 12 -133.432 232.93 9
 0 7 12 -42.4732 272.068 4
 0 -7 -12 3.18408 236.962 7
 0 -7 -13 15055.4 1165.12 7
 0 7 13 14214.3 1150.72 4
 0 7 -14 7592.7 827.318 7
 0 -7 -14 8030.48 815.475 7
 0 7 14 7551.1 850.396 4
 0 -7 -15 2276.2 433.854 7
 0 7 -15 3297.5 548.031 7
 0 7 15 2400.4 478.548 4
 0 7 -16 2254.69 408.746 7
 0 7 16 2742.08 473.351 4
 0 -7 -16 2819.17 431.935 7
 0 -7 -16 3411.32 545.656 9
 0 -7 -17 2992.8 459.199 9
 0 7 17 2434.48 398.269 4
 0 7 -17 1829.65 346.901 7
 0 7 18 2905.16 369.756 4
 0 -7 -18 2143.18 359.268 9
 0 -7 -19 2436.63 311.961 9
 0 -8 0 1132.22 857.09 1
 0 -8 1 160.777 560.697 1
 0 -8 2 21199.6 2565.17 1
 0 -8 3 10541.4 1797.91 1
 0 -8 4 735.412 682.835 1
 0 -8 5 2103.25 484.498 8
 0 8 -5 1805.83 718.669 2
 0 -8 -5 2339.44 505.994 7
 0 -8 -5 2932.65 466.414 9
 0 -8 5 1943.68 926.603 1
 0 -8 6 1780.82 889.525 1
 0 -8 -6 756.71 309.494 9
 0 -8 6 438.22 276.471 8
 0 -8 -6 938.444 358.173 7
 0 -8 -7 -173.362 214.071 7
 0 -8 -7 219.431 280.231 9
 0 8 7 -324.645 269.64 4
 0 -8 7 128.125 301.681 8
 0 -8 7 1000.06 703.834 1
 0 -8 7 -273.301 242.44 9
 0 -8 -8 1327.92 396.643 7
 0 -8 -8 1240.84 399.228 9
 0 -8 8 158.202 231.927 9
 0 -8 8 341.83 470.151 1
 0 8 8 711.583 287.825 4
 0 8 9 9104.51 910.145 4
 0 -8 -9 9503.74 941.201 9
 0 -8 9 8951.41 891.696 9
 0 -8 9 10405.3 1979.81 1
 0 -8 -9 8921.36 938.336 7
 0 -8 -10 3283.74 608.319 7
 0 8 10 2617.13 505.476 4
 0 -8 10 4907.21 682.353 9
 0 -8 -10 3408.25 619.721 9
 0 -8 -11 641.756 411.871 9
 0 -8 -11 343.893 272.373 7
 0 8 11 3.06869 260.285 4
 0 -8 11 855.736 277.15 9
 0 -8 -12 2443.68 478.717 7
 0 -8 -12 2042.21 513.825 9
 0 -8 12 1791.89 524.018 9
 0 8 12 1733.37 431.043 4
 0 -8 -13 4963.79 670.604 7
 0 -8 -13 5150.78 729.588 9
 0 8 13 6069.98 712.28 4
 0 8 14 260.022 219.862 4
 0 -8 -14 220.296 314.822 7
 0 8 -14 110.342 287.916 7
 0 -8 -14 444.932 335.538 9
 0 8 -15 604.367 286.714 7
 0 8 15 1348.49 342.862 4
 0 -8 -15 1050.77 324.384 7
 0 -8 -15 1687.66 417.055 9
 0 -8 -16 393.077 236.092 7
 0 -8 -16 321.265 258.964 9
 0 8 -16 591.325 228.629 7
 0 8 16 52.4093 211.181 4
 0 8 17 1154.72 254.49 4
 0 -8 -17 1784.87 335.783 9
 0 -8 -18 3874.08 392.426 9
 0 -9 0 380.925 267.346 9
 0 -9 0 -120.293 266.682 8
 0 -9 1 6013.03 711.334 9
 0 -9 1 5592.73 1417.76 1
 0 -9 -1 5310.87 687.054 9
 0 -9 -1 5500.8 705.857 8
 0 -9 1 6312.53 750.355 8
 0 -9 2 5451.73 709.683 8
 0 -9 2 6941.23 745.884 9
 0 -9 2 6260.83 1558.66 1
 0 -9 -2 7166.46 768.824 9
 0 -9 -3 45.7954 244.25 9
 0 -9 3 39.7202 310.513 8
 0 -9 3 246.816 264.238 9
 0 -9 3 -492.699 506.296 1
 0 -9 4 -143.612 319.078 9
 0 -9 -4 -16.5797 269.636 7
 0 -9 4 12.5417 323.386 8
 0 9 -4 280.495 438.84 2
 0 -9 -4 88.0924 191.329 9
 0 -9 4 606.933 692.537 1
 0 -9 -5 26103 1698.5 7
 0 -9 -5 27093.6 1643.78 9
 0 -9 5 30723.3 1772.14 8
 0 -9 5 32543.4 1723.01 9
 0 -9 5 32447.6 3493.24 1
 0 -9 -6 4585.12 694.41 9
 0 -9 6 5234.68 741.626 8
 0 -9 -6 5000.48 728.291 7
 0 -9 6 6940.71 1658.41 1
 0 -9 6 5701.08 713.663 9
 0 -9 7 22390 2975.65 1
 0 -9 -7 21514.4 1448.5 9
 0 -9 7 19714.7 1449.21 8
 0 -9 7 22457 1435.97 9
 0 -9 -7 21810.4 1536.35 7
 0 -9 -8 4325.14 658.858 9
 0 -9 8 3739.72 639.232 9
 0 -9 8 2271.69 1242.29 1
 0 -9 -8 3384.49 605.799 7
 0 -9 -9 4044.65 665.991 9
 0 -9 -9 4769.55 727.51 7
 0 -9 9 4774.75 661.974 9
 0 9 9 3785 547.62 4
 0 -9 -10 38639.6 2053.02 9
 0 9 10 39208.5 1943.92 4
 0 -9 -10 36373.6 2047.36 7
 0 9 11 -24.9241 244.969 4
 0 -9 -11 -65.3386 363.011 9
 0 -9 -11 564.622 349.596 7
 0 9 12 -127.403 185.321 4
 0 -9 -12 -135.784 268.074 7
 0 -9 -12 84.2876 349.388 9
 0 -9 -13 5871.58 729.803 9
 0 -9 -13 5659.46 675.249 7
 0 9 13 4499.17 566.194 4
 0 9 14 4369.82 521.11 4
 0 -9 -14 3427.74 533.812 7
 0 9 -14 3852.62 542.481 7
 0 -9 -14 5444.75 650.366 9
 0 -9 -15 1975.62 354.421 7
 0 -9 15 1480.37 310.149 6
 0 9 -15 2329.82 373.262 7
 0 -9 -15 2386.03 440.199 9
 0 9 15 2151.74 368.112 4
 0 9 16 29.4343 124.18 4
 0 -9 -16 591.52 252.233 9
 0 9 -16 264.64 156.357 7
 0 -9 -17 1511.92 262.86 9
 0 -10 0 94614.8 3746.88 8
 0 -10 0 95202.9 3697.31 9
 0 -10 1 1736.51 498.33 8
 0 -10 1 1239.9 414.891 9
 0 -10 -1 1653.73 489.894 8
 0 -10 -1 2328.06 536.268 9
 0 -10 -2 12971.6 1116.19 9
 0 -10 -2 14160.2 1198.94 8
 0 -10 2 16532.1 1199.9 9
 0 -10 2 14555 1200.26 8
 0 -10 3 6776.8 797.531 9
 0 -10 -3 6551.46 823.818 8
 0 -10 3 8318.66 1812.42 1
 0 -10 -3 6610.22 789.062 9
 0 -10 3 6300.88 823.054 8
 0 -10 4 19423.9 2950.28 1
 0 -10 4 21001.7 1388.37 9
 0 -10 -4 19770.6 1397.09 9
 0 -10 4 20523.3 1463.84 8
 0 -10 5 11691.7 1019.92 9
 0 -10 -5 13163.7 1121.37 9
 0 -10 5 11640.8 1090.33 8
 0 -10 5 10149 2327.17 1
 0 -10 -6 13056.4 1130.85 9
 0 -10 6 14177.5 1202.89 8
 0 -10 6 14788.5 1153.15 9
 0 -10 -7 41235.8 2260.18 7
 0 -10 7 42914.3 2237.06 8
 0 -10 7 42039.1 2114.79 9
 0 -10 -7 39997.8 2126.05 9
 0 -10 -8 25467.2 1619.55 9
 0 -10 -8 27328.6 1749.6 7
 0 -10 -9 10899.5 1059 7
 0 -10 -9 10027.7 994.519 9
 0 -10 -10 6345.87 789.145 9
 0 -10 -10 5883.69 773.163 7
 0 -10 -11 24000.6 1515.73 7
 0 -10 -11 24871.3 1524.09 9
 0 -10 -12 13168.5 1028.91 7
 0 -10 -12 14082.6 1075.04 9
 0 -10 -13 391.761 300.054 9
 0 -10 14 337.785 208.003 6
 0 10 -14 769.018 258.338 7
 0 -10 -14 742.315 322.042 9
 0 -10 15 1815.07 289.793 6
 0 10 -15 2497.07 328.845 7
 0 -10 -15 2768.66 390.005 9
 0 -10 -16 2013.09 293.809 9
 0 -11 0 449.958 325.562 9
 0 -11 0 -141.086 335.599 8
 0 -11 1 7072.92 818.474 9
 0 -11 1 5785.23 817.383 8
 0 -11 -1 7212.47 861.878 9
 0 -11 -1 7233.96 894.101 8
 0 -11 2 5004.51 698.302 9
 0 -11 -2 4850.92 697.427 9
 0 -11 -2 4801.44 745.646 8
 0 -11 2 5068.2 750.812 8
 0 -11 3 2509.9 595.466 8
 0 -11 -3 4452.45 741.294 8
 0 -11 3 3667.66 580.786 9
 0 -11 -3 2959.61 573.305 9
 0 -11 -4 13008.7 1139.49 9
 0 -11 -4 15692.9 1289.45 8
 0 -11 4 13756.2 1203.81 8
 0 -11 4 16219.5 1214.84 9
 0 -11 5 33549.7 1947.24 8
 0 -11 5 36209.7 1867.21 9
 0 -11 -5 29850.4 1808.98 9
 0 -11 -5 34651.5 1988.24 8
 0 -11 6 19013.4 1311 9
 0 -11 -6 20107.9 1395.42 9
 0 -11 6 19394.5 1436.76 8
 0 -11 -7 21456.2 1449.46 9
 0 -11 -8 4212.43 646.131 9
 0 -11 -9 12033.8 1034.34 9
 0 -11 -10 26815.3 1543.5 9
 0 -11 -11 1283.97 371.954 9
 0 -11 -12 2805.48 465.894 9
 0 -11 -12 3323.68 462.247 8
 0 -11 -13 14852.3 924.958 9
 0 -11 -13 14467.6 862.743 8
 0 11 -13 12495.9 856.595 7
 0 -11 -14 366.008 185.88 9
 0 -11 14 267.988 160.251 6
 0 11 -14 258.539 142.567 7
 0 -11 -15 -9.3591 126.499 9
 0 -12 0 65478.7 2961 8
 0 -12 0 68317.3 2898.68 9
 0 -12 1 6514.18 759.953 9
 0 -12 -1 6268.73 781.301 9
 0 -12 -1 5118.75 782.491 8
 0 -12 1 7057.11 865.762 8
 0 -12 -2 2491.95 591.275 8
 0 -12 2 2355.7 573.692 8
 0 -12 2 2461.16 473.74 9
 0 -12 -2 3152.2 569.341 9
 0 -12 3 16808.1 1308.52 8
 0 -12 -3 17364.3 1279.99 9
 0 -12 3 17504.9 1231.4 9
 0 -12 -3 15319.9 1270.43 8
 0 -12 4 1526.19 487.76 8
 0 -12 4 1063.92 379.632 9
 0 -12 -4 919.937 396.449 9
 0 -12 -4 313.402 369.45 8
 0 -12 -5 1781.85 540.734 8
 0 -12 -5 871.307 358.353 9
 0 -12 5 921.231 412.068 8
 0 -12 -6 14691.8 1195.21 8
 0 -12 -6 15204.6 1149.51 9
 0 -12 -7 4411.81 601.396 9
 0 -12 -7 4115.96 645.784 8
 0 -12 -8 820.356 325.335 9
 0 -12 -8 1129.27 417.635 8
 0 -12 -9 704.506 302.095 9
 0 -12 -9 482.317 275.984 8
 0 -12 -10 705.282 293.262 9
 0 -12 -10 265.289 255.361 8
 0 -12 -11 -163.251 199.774 8
 0 -12 -11 -42.0915 197.522 9
 0 -12 -12 4105.01 468.709 9
 0 -12 -12 4598.72 433.272 8
 0 -12 -13 663.983 190.883 9
 0 -12 13 418.023 161.475 6
 0 -13 0 -272.192 285.064 9
 0 -13 0 247.109 344.28 8
 0 -13 -1 7208.13 758.89 9
 0 -13 1 5771.9 689.378 9
 0 -13 1 6263.79 817.514 8
 0 -13 -1 6868.35 824.052 8
 0 -13 2 1977.32 397.989 9
 0 -13 -2 1864.63 503.761 8
 0 -13 2 2141.69 519.518 8
 0 -13 -2 2061.28 476.674 9
 0 -13 -3 130.614 230.598 9
 0 -13 -3 296.807 320.948 8
 0 -13 3 655.172 359.654 8
 0 -13 -4 211.705 355.125 8
 0 -13 4 543.15 362.959 8
 0 -13 -4 484.885 279.884 9
 0 -13 -5 334.73 324.242 8
 0 -13 -5 33.0084 272.554 9
 0 -13 -6 378.008 282.64 8
 0 -13 -6 324.562 272.225 9
 0 -13 -7 138.274 236.757 9
 0 -13 -7 151.601 266.711 8
 0 -13 -8 1868.15 377.363 8
 0 -13 -8 1541.73 353.524 9
 0 -13 -9 -169.37 229.904 8
 0 -13 -9 -158.164 192.231 9
 0 -13 -10 431.979 212.244 9
 0 -13 -10 382.981 192.606 8
 0 -13 -11 508.477 148.642 9
 0 -13 11 21.976 118.822 6
 0 -14 0 2556.22 475.66 8
 0 -14 1 3013.93 527.826 8
 0 -14 -1 2260.87 371.862 9
 0 -14 -1 2975.94 516.778 8
 0 -14 -2 415.025 307.743 8
 0 -14 -2 521.992 247.294 9
 0 -14 2 348.395 316.533 8
 0 -14 -3 2157.77 365.814 9
 0 -14 -3 2421.74 434.348 8
 0 -14 3 1611.58 415.343 8
 0 -14 -4 -147.15 206.349 9
 0 -14 -4 489.294 287.719 8
 0 -14 -5 584.806 265.113 8
 0 -14 -5 528.815 229.293 9
 0 -14 -6 5207.83 512.089 9
 0 -14 -6 6204.43 585.812 8
 0 -14 -7 755.603 239.832 9
 0 -14 -7 1099.64 279.568 8
 0 -14 -8 103.15 117.145 9
 0 -14 -8 -123.717 164.883 8
 0 -14 9 49.7136 138.04 6
 0 -15 0 35.2678 189.682 8
 0 -15 -1 3055.1 404.435 8
 0 -15 -2 2689.6 378.43 8
 0 -15 -3 10571.6 699.687 8
 0 -15 -4 379.443 185.543 8
 0 -15 -5 2325.85 296.496 8
 -1 0 0 471.093 150.022 2
 -1 0 -1 73234.5 2563.65 2
 -1 0 1 73656.5 2258.76 2
 -1 0 -3 61411.6 2550.77 2
 -1 0 -4 660.052 321.387 2
 1 0 -4 212.718 153.925 2
 -1 0 -5 591038 17379.5 2
 1 0 -5 608872 16535.6 2
 1 0 -6 7657.77 677.799 2
 -1 0 -6 7220.07 931.362 2
 1 0 -7 26249.8 1491.69 2
 -1 0 -7 28462.3 1992.69 2
 1 0 -8 -203.55 259.275 2
 -1 0 -8 1052.43 447.043 2
 -1 0 -9 214972 7991.13 2
 -1 0 -10 1292.57 591.687 2
 -1 0 -11 15898.9 1842.04 2
 1 0 -12 42225.7 1959.16 3
 -1 0 -12 32610.1 1880.17 10
 -1 0 -12 41066.6 1983.91 3
 -1 0 -12 39914.1 3094.69 2
 1 0 -12 40229 1997.17 7
 1 0 -12 43651.6 2089.07 10
 1 0 -13 26317.4 1624.82 7
 -1 0 -13 30349 1706.84 3
 1 0 -13 27251.7 1569.89 3
 -1 0 -13 28754.9 1707.81 10
 1 0 -13 29807.4 1714.66 10
 1 0 -14 3864.6 631.54 10
 -1 0 -14 3729.65 617.047 3
 -1 0 -14 3730.38 634.534 10
 1 0 -14 4893.08 675.611 3
 1 0 -14 4004.79 618.702 7
 -1 0 -15 14942.3 1262.44 10
 1 0 -15 17448.5 1309 10
 -1 0 -15 15304.4 1237.01 3
 1 0 -15 16475.8 1271.62 7
 1 0 -15 16477 1241.15 3
 -1 0 -16 6209.72 806.439 3
 -1 0 -16 8030.24 916.548 10
 1 0 -16 7563.05 865.588 10
 1 0 -16 7220.51 841.987 7
 1 0 -16 6948 820.4 3
 1 0 -17 -134.744 299.275 7
 -1 0 -17 253.509 377.082 10
 -1 0 -17 277.161 404.906 3
 1 0 -17 241.718 292.91 10
 -1 0 -18 2650.02 554.591 3
 1 0 -18 3181.77 576.732 10
 1 0 -18 2945.37 508.289 7
 -1 0 -18 2763.54 530.392 10
 1 0 -19 5175.63 567.531 7
 -1 0 -19 5355.24 626.09 3
 -1 0 -19 5865.38 676.598 10
 1 0 -19 5968.01 680.594 10
 1 0 -20 17368.5 1013.86 10
 -1 0 -20 17289.6 1019.04 10
 1 0 -20 14025.8 834.312 7
 -1 0 -21 809.488 218.18 10
 1 0 -21 282.31 170.689 10
 1 1 -21 8849.82 575.668 10
 -1 1 21 7409.32 516.315 4
 -1 -1 -21 7355.99 552.476 10
 1 1 -20 6706.05 554.957 7
 -1 -1 -20 8926.5 724.218 10
 1 1 -20 9844.34 729.798 10
 1 1 -19 8049.18 759.483 10
 -1 -1 -19 8339.96 802.958 10
 1 1 -19 6764.43 653.41 7
 1 1 -18 982.964 418.711 10
 1 1 -18 1169.81 362.215 7
 -1 -1 -18 1672.51 483.578 10
 -1 -1 -18 1506.62 447.454 3
 1 1 -17 12408.6 1047.38 7
 -1 -1 -17 10908.9 1043.96 10
 1 1 -17 13134.6 1069.01 3
 1 1 -17 12002.2 1055.13 10
 -1 -1 -17 11225.6 1033.25 3
 1 1 -16 14069.2 1164.35 7
 1 1 -16 13755.1 1122.71 3
 -1 -1 -16 11532 1075.56 3
 1 1 -16 11696.7 1069.5 10
 -1 -1 -16 12245.2 1146.64 10
 1 1 -15 22218.5 1524.75 7
 1 1 -15 22569.8 1493.32 3
 -1 -1 -15 22179.1 1552.64 10
 1 1 -15 23101.9 1554.59 10
 -1 -1 -15 22946.4 1514.54 3
 -1 -1 -14 13180.8 1125.14 3
 -1 -1 -14 15173.9 1232.22 10
 1 1 -14 14359.8 1149.63 3
 1 1 -14 15858.4 1237.18 7
 1 1 -14 15155.5 1220.1 10
 1 1 -13 9598.75 890.186 3
 -1 -1 -13 7401.1 832.494 3
 1 1 -13 9637.38 936.011 7
 -1 -1 -13 8802.42 1429.76 2
 -1 -1 -13 8078.25 862.572 10
 1 1 -13 10769.4 973.834 10
 1 1 -12 34402 1830.86 7
 -1 -1 -12 35275.7 1843.49 10
 -1 -1 -12 31684.9 2745.94 2
 -1 -1 -12 34988.6 1773.55 3
 1 1 -12 33071.3 1800.25 10
 1 1 -12 32480.2 1702.89 3
 -1 -1 -11 39907.8 2975.23 2
 -1 -1 -10 36699.1 2735.07 2
 -1 -1 -9 204413 7778.91 2
 -1 -1 -8 59005 3254.19 2
 -1 -1 -7 31318.9 2154 2
 1 1 -7 34408 1591.33 2
 -1 -1 -6 284488 9424.91 2
 1 1 -6 294900 8358.06 2
 1 1 -5 184548 5263.69 2
 -1 -1 -5 173271 6212.14 2
 1 1 -4 76632.4 2269.21 2
 -1 -1 -4 74205.9 3143.38 2
 -1 -1 -3 10112.5 898.147 2
 -1 -1 -2 48372.8 2049.07 2
 -1 -1 -1 179441 5422.94 2
 -1 -1 0 89920.3 2846.87 2
 -1 1 -1 174890 5390.5 2
 -1 -1 1 171646 4788.11 2
 1 -1 -2 51329.9 1675.3 1
 -1 -1 2 51518.4 1832.12 1
 -1 1 -2 51726.3 2200.46 2
 -1 1 -3 9776.47 909.38 2
 -1 -1 3 12533.2 701.319 1
 -1 1 -4 70516.2 3115.77 2
 -1 -1 4 79817.1 2622.51 1
 -1 1 -5 167616 5896.55 2
 -1 1 -6 286406 9186.03 2
 1 -1 -6 277588 8565.26 2
 1 -1 -7 29560.9 1795.43 2
 -1 1 -7 36696.1 2303.42 2
 -1 1 -8 53065.8 3059.88 2
 1 -1 -8 55279.1 2694.27 2
 -1 1 -9 204749 7797.11 2
 1 -1 -9 210742 7236.1 2
 -1 1 -10 35415.9 2658.69 2
 -1 1 -11 41806.7 3051.76 2
 1 -1 -12 32071.9 1686.93 3
 1 -1 -12 32547.3 1751.1 7
 -1 1 -12 32158.8 1745.85 3
 -1 1 -12 34209.9 2786.73 2
 -1 1 -12 33476.5 1761.39 10
 1 -1 -12 34659.4 1805.45 10
 1 -1 -13 9048.31 882.522 7
 -1 1 -13 8187.67 868.134 3
 1 -1 -13 8808.86 886.811 10
 -1 1 -13 8401.52 947.635 10
 1 -1 -13 9536.67 899.388 3
 1 -1 -14 13993.5 1130.06 7
 -1 1 -14 12192.2 1111.28 3
 1 -1 -14 14575.8 1152.36 3
 1 -1 -14 14454.5 1163.92 10
 -1 1 -14 12613.1 1141.26 10
 1 -1 -15 24731.4 1543.28 3
 -1 1 -15 21955.5 1527.87 10
 1 -1 -15 23389.5 1537.2 10
 -1 1 -15 20631 1477.58 3
 1 -1 -15 23141 1524.93 7
 -1 1 -16 12986.7 1140.64 3
 1 -1 -16 12838.9 1099.59 7
 1 -1 -16 11049.3 1040.92 10
 -1 1 -16 14432.2 1189.25 10
 1 -1 -17 11620.3 1043.28 10
 1 -1 -17 12301.3 1040.41 7
 -1 1 -17 11075.7 1027.44 10
 -1 1 -17 12535.2 1087.89 3
 1 -1 -18 1547.6 385.026 7
 -1 1 -18 1429.84 433.041 10
 1 -1 -18 1321.7 420.323 10
 -1 1 -18 1622.79 449.895 3
 1 -1 -19 7594.03 675.923 7
 -1 1 -19 7499.82 737.607 10
 1 -1 -19 7245.93 723.173 10
 -1 1 -19 6712.77 698.416 3
 1 -1 -20 8635.12 603.183 7
 1 -1 -20 9013.47 716.741 10
 -1 1 -20 8146.46 685.016 10
 1 -1 -21 8355.05 571.76 10
 -1 1 -21 6946.95 517.945 10
 -1 -2 -21 1948.06 283.173 10
 -1 2 21 1878.16 256.87 4
 1 2 -21 1738.24 265.37 10
 -1 -2 -20 15600.7 983.813 10
 1 2 -20 13399.1 791.534 7
 1 2 -20 18852 996.874 10
 -1 2 20 18159.8 1031.29 4
 1 2 -19 1140.1 346.699 10
 1 2 -19 1035.01 294.77 7
 -1 -2 -19 934.673 390.574 10
 1 2 -18 754.206 367.647 10
 -1 -2 -18 1037.65 401.754 10
 1 2 -18 1247.48 343.511 7
 1 2 -17 3289.95 538.856 7
 1 2 -17 3784.74 623.758 10
 1 2 -17 3384.41 565.11 3
 -1 -2 -17 3038.08 589.938 3
 -1 -2 -17 3041.01 590.981 10
 -1 -2 -16 11206.6 1050.89 3
 1 2 -16 9737.84 961.702 3
 -1 -2 -16 10409.8 1034.76 10
 1 2 -16 10289.4 982.498 10
 1 2 -16 11785.3 1062.98 7
 -1 -2 -15 4356.94 679.124 10
 1 2 -15 6142.21 777.473 7
 -1 -2 -15 5331.98 724.43 3
 1 2 -15 6217.9 779.657 3
 1 2 -15 6553.02 806.268 10
 -1 -2 -14 30574.9 1843.93 10
 1 2 -14 34552.4 1840.35 3
 1 2 -14 33520.6 1913.98 7
 1 2 -14 34727.2 1907.22 10
 -1 -2 -14 30790 1788.97 3
 1 2 -13 11201.2 960.415 3
 -1 -2 -13 8997.13 937.992 10
 1 2 -13 10986.9 1005.3 7
 -1 -2 -13 9994.74 926.059 3
 1 2 -13 10608 1009.03 10
 -1 -2 -13 7844.4 1552.56 2
 1 2 -12 42880.9 2105.71 10
 -1 -2 -12 42020 3302.12 2
 -1 -2 -12 46402.2 2110.5 3
 -1 -2 -12 44911.1 2156.49 10
 1 2 -12 43096.2 2055.07 3
 1 2 -12 43489.5 2178.49 7
 -1 -2 -11 1861.36 732.469 2
 -1 -2 -10 40390.1 2932.17 2
 -1 -2 -9 26594.5 2246.64 2
 -1 -2 -8 11418.2 1386.47 2
 1 2 -7 3079.26 414.058 2
 -1 -2 -7 3184.54 736.147 2
 -1 -2 -6 208045 7260.37 2
 1 2 -6 204003 6037.83 2
 1 2 -5 46367.4 1682.6 2
 -1 -2 -5 43343.3 2429.83 2
 1 2 -4 118259 3524.74 2
 -1 -2 -4 115963 4456.67 2
 1 2 -3 241444 6755.75 2
 -1 -2 -3 236982 7576.58 2
 -1 -2 -2 88354.5 3312.18 2
 -1 -2 -1 265494 7856.26 2
 -1 -2 0 40316.2 1683.65 2
 1 -2 -1 243042 7092.59 1
 -1 -2 1 232838 7271.2 1
 1 -2 -2 91303.6 3080.49 1
 -1 -2 2 88506.9 3261.5 1
 -1 2 -2 84124.6 3435.55 2
 -1 2 -3 232850 7603.15 2
 -1 -2 3 240601 7262.82 1
 -1 2 -4 120560 4658.17 2
 -1 -2 4 126633 4298.87 1
 -1 -2 5 40383.3 1967.92 1
 -1 2 -5 42374.4 2365.54 2
 -1 2 -6 204383 7234.23 2
 -1 -2 6 204222 6543.13 1
 -1 -2 7 3082.65 540.073 1
 -1 2 -7 2497.8 666.861 2
 -1 2 -8 13586.3 1454.13 2
 -1 -2 8 9534.52 985.391 1
 -1 2 -9 23969.1 2076.11 2
 -1 2 -10 42030.3 2982.75 2
 -1 2 -11 2093.72 704.822 2
 -1 2 -12 41950.2 2063.16 10
 1 -2 -12 43447.3 2110.21 7
 1 -2 -12 46957.5 2120.28 3
 1 -2 -12 43410 2062.7 10
 1 -2 -13 9912.05 949.294 10
 -1 2 -13 10485.4 984.133 3
 1 -2 -13 10505.7 928.36 3
 1 -2 -13 10309.9 958.737 7
 -1 2 -13 5756.2 786.534 10
 1 -2 -14 30639.6 1760.79 10
 -1 2 -14 29182.8 1791.9 3
 1 -2 -14 34447.2 1845.73 3
 1 -2 -14 32769.9 1825.83 7
 -1 2 -14 31368.2 1811.62 10
 1 -2 -15 5606.08 727.624 7
 -1 2 -15 4916.53 709.188 10
 -1 2 -15 4272.82 696.475 3
 1 -2 -15 5474.77 723.205 10
 1 -2 -16 12157.1 1038.05 7
 -1 2 -16 10200.9 994.972 10
 -1 2 -16 9814.02 1055.11 3
 1 -2 -16 10248.7 1161.35 10
 1 -2 -17 3502.36 606.729 10
 1 -2 -17 3337.55 567.034 7
 -1 2 -17 3788.27 622.739 3
 -1 2 -17 3921.27 610.737 10
 -1 2 -18 738.053 379.734 3
 1 -2 -18 672.336 319.168 7
 -1 2 -18 708.24 321.155 10
 1 -2 -18 1687.51 446.697 10
 -1 2 -19 841.088 305.542 10
 1 -2 -19 1506.55 393.729 10
 -1 2 -19 863.4 341.774 3
 1 -2 -19 1024.4 300.83 7
 -1 2 -20 15159.6 882.906 10
 1 -2 -20 15521.9 833.21 7
 1 -2 -20 16605.8 961.201 10
 1 2 21 1647.41 260.311 4
 1 -2 -21 1640.61 259.358 10
 1 3 -20 443.487 170.574 7
 -1 3 20 985.8 268.187 4
 -1 -3 -20 313.988 176.259 9
 1 3 -20 928.013 235.973 10
 -1 -3 -20 802.938 286.48 10
 -1 3 19 1404.24 353.873 4
 1 3 -19 1162.79 336.001 10
 -1 -3 -19 1640.04 390.798 10
 1 3 -19 1366.28 306.872 7
 -1 -3 -18 830.15 391.124 10
 1 3 -18 617.925 292.367 7
 1 3 -18 686.295 324.708 10
 -1 -3 -17 962.515 419.574 10
 1 3 -17 836.539 353.69 3
 1 3 -17 710.093 313.681 7
 1 3 -17 277.39 318.353 10
 1 3 -16 47148.3 2214.3 3
 1 3 -16 45872.8 2304.07 7
 -1 -3 -16 43904.4 2265.18 10
 -1 -3 -16 45636.7 2254.04 3
 1 3 -16 46201.2 2232.29 10
 1 3 -15 17135.4 1246.3 3
 -1 -3 -15 21557.4 1421.74 3
 1 3 -15 17592.7 1307.27 10
 -1 -3 -15 17948.2 1348.41 10
 1 3 -15 16559.7 1333.8 7
 -1 -3 -14 12377 1085.29 3
 1 3 -14 12653.1 1071.23 10
 1 3 -14 11653.6 1099.58 7
 -1 -3 -14 12401.6 1096.02 10
 1 3 -14 15186.4 1151.89 3
 -1 -3 -13 8857.75 1593.95 2
 -1 -3 -13 8941.52 900.498 3
 1 3 -13 10497.1 944.302 3
 -1 -3 -13 8905.14 933.759 10
 1 3 -13 9392.75 948.307 10
 1 3 -13 9505.11 963.235 7
 1 3 -12 75071.6 2983.15 3
 -1 -3 -12 77895.6 4787.49 2
 -1 -3 -12 79825.5 3105.55 10
 1 3 -12 69115.2 2995.93 10
 -1 -3 -12 78541.3 3041.5 3
 1 3 -12 73295.1 3192.34 7
 -1 -3 -11 26475.4 2552.5 2
 -1 -3 -10 31789.9 2686.88 2
 -1 -3 -9 29131.8 2464.23 2
 -1 -3 -8 75964.8 4067.83 2
 -1 -3 -7 17151.1 1692.88 2
 -1 -3 -6 48672 2890.24 2
 1 3 -6 53563.1 2139 2
 1 3 -5 24837.2 1274.37 2
 -1 -3 -5 20530.8 1716.84 2
 -1 -3 -4 117892 4710.91 2
 1 3 -4 122524 3996.9 2
 -1 -3 -3 9703.71 1049.52 2
 -1 -3 -2 140253 4980.63 2
 -1 -3 -1 88906 3443.76 2
 1 -3 0 148734 5135.57 1
 1 -3 -1 77840.3 3212.71 1
 -1 -3 1 86062.8 3533.18 1
 1 -3 -2 126310 4556.95 1
 -1 -3 2 133708 4849.3 1
 -1 -3 3 12858.8 1136.49 1
 1 -3 -3 10683.8 993.424 1
 -1 3 -3 8904.94 1067.69 2
 -1 -3 4 120171 4541.37 1
 -1 3 -4 112941 4688.83 2
 -1 -3 5 25341.4 1686.05 1
 -1 3 -5 23384.5 1819.4 2
 -1 -3 6 49801.9 2568.06 1
 -1 3 -6 50004.7 2905.67 2
 -1 -3 7 19527.7 1525.61 1
 -1 3 -7 15384.9 1591.02 2
 -1 -3 8 81190.1 3696.48 1
 -1 3 -8 83655.1 4200.91 2
 -1 3 -9 34976.2 2630.96 2
 -1 3 -10 38679.8 2897.68 2
 -1 3 -11 27154.3 2520.32 2
 1 -3 -11 29846.3 1592.36 3
 -1 3 -12 73473 3043.16 10
 1 -3 -12 78280.1 3043.84 10
 1 -3 -12 80002.4 3140.56 7
 -1 -3 12 77465.4 3339.89 9
 -1 3 -13 9651.58 948.329 3
 1 -3 -13 7801.98 801.388 10
 1 -3 -13 7463.02 804.068 7
 -1 3 -13 7248.39 851.753 10
 -1 3 -14 12202.2 1102.14 3
 1 -3 -14 12678.4 1062.46 7
 1 -3 -14 11837.1 1013.19 10
 -1 3 -14 11972 1040.78 10
 1 -3 -15 18212.9 1313.6 7
 -1 3 -15 16792.8 1295.61 3
 1 -3 -15 15702.9 1223.02 10
 -1 3 -15 15366.4 1194.71 10
 1 -3 -16 43416.8 2166.09 7
 1 -3 -16 40886.7 2140.43 10
 -1 3 -16 44852.4 2155.28 10
 -1 3 -16 45148.7 2244.83 3
 1 -3 -17 873.82 355.988 7
 -1 3 -17 681.585 346.036 10
 1 -3 -17 576.01 327.731 10
 -1 3 -17 574.201 368.333 3
 1 -3 -18 921.807 325.51 10
 -1 3 -18 1179.18 374.388 3
 -1 3 -18 424.035 263.588 10
 1 -3 -18 1116.98 318.756 7
 -1 3 -19 2361.01 367.343 10
 1 -3 -19 1626.34 369.53 10
 1 -3 -19 1613.66 331.546 7
 -1 3 -19 1641.84 353.373 3
 -1 3 -20 797.03 195.752 10
 1 -3 -20 1084.69 250.174 10
 -1 -4 -20 797.952 231.103 10
 -1 4 20 953.063 233.821 4
 1 4 -20 439.249 156.974 10
 -1 -4 -20 650.283 166.578 9
 -1 -4 -19 6254.32 618.982 10
 -1 4 19 5971.94 627.306 4
 1 4 -19 5405.04 526.572 7
 -1 -4 -19 6099.92 585.062 9
 1 4 -19 5292.24 514.726 10
 -1 -4 -18 2110.64 418.443 10
 1 4 -18 1497.4 334.168 7
 -1 4 18 1620.11 415.633 4
 1 4 -18 2049.72 383.175 10
 1 4 -17 3247.5 503.754 10
 1 4 -17 3128.16 517.016 7
 -1 -4 -17 2919.49 565.427 10
 1 4 -16 1380.66 372.684 10
 -1 -4 -16 1160.28 427.027 10
 1 4 -16 1267.71 365.112 3
 1 4 -16 1461.58 417.923 7
 1 4 -15 62580.7 2614.59 3
 1 4 -15 59036.2 2755.13 7
 -1 -4 -15 51567.6 2577.63 10
 1 4 -15 59981.1 2580.05 10
 1 4 -14 5310.75 680.002 10
 -1 -4 -14 6866.19 813.651 10
 1 4 -14 6738.34 744.34 3
 1 4 -14 4084.47 711.367 7
 -1 -4 -13 19453.5 1339.1 10
 1 4 -13 18246.3 1410.42 7
 1 4 -13 18923.2 1302.49 10
 -1 -4 -13 18037.8 1304.86 3
 -1 -4 -12 1892.84 471.249 3
 -1 -4 -12 2701.02 546.917 10
 -1 -4 -12 710.346 459.123 2
 1 4 -12 4685.23 623.773 10
 -1 -4 -11 123886 4196.47 3
 -1 -4 -11 118022 4197.86 10
 -1 -4 -11 103931 5929.93 2
 -1 -4 -10 6032.91 1235.98 2
 -1 -4 -9 9356.48 1465.03 2
 -1 -4 -8 2336.73 798.888 2
 -1 -4 -7 129799 5834.91 2
 -1 -4 -6 2963.81 831.883 2
 1 4 -5 99721.2 3814.09 2
 -1 -4 -5 108341 4734.71 2
 -1 -4 -4 22137.7 1794.7 2
 -1 -4 -3 54792.8 2897.3 2
 -1 -4 -2 40982 2370.64 2
 1 -4 2 43588.8 2489.64 1
 1 -4 1 9356.76 1076.96 1
 -1 -4 0 5822.18 945.776 1
 1 -4 0 6531.18 879.124 1
 1 -4 -1 8889.28 1026.76 1
 -1 -4 1 7681.63 1091.19 1
 -1 -4 2 39461.1 2442.38 1
 1 -4 -2 37654.1 2250.29 1
 -1 -4 3 59898.9 3102.66 1
 1 -4 -3 54553.9 2867.16 1
 -1 4 -4 20871.5 1783.25 2
 -1 -4 4 20297.4 1693.66 1
 -1 4 -5 113351 4927.33 2
 -1 -4 5 105966 4620.8 1
 -1 -4 6 2794.24 669.8 1
 -1 4 -6 3930.27 835.244 2
 -1 -4 7 127825 5377.47 1
 -1 4 -7 136933 5794.3 2
 -1 4 -8 3068.57 853.518 2
 -1 -4 8 4060.82 879.393 1
 -1 -4 9 9611.32 1277.44 1
 -1 4 -9 10403 1434.11 2
 -1 4 -10 7587.48 1336.4 2
 1 -4 -11 111721 3962.43 10
 -1 -4 11 120140 4382.31 9
 1 -4 -11 114012 4119.76 7
 -1 -4 12 4323.77 692.306 9
 1 -4 -12 1874.32 459.383 10
 1 -4 -12 2599.66 488.677 7
 1 -4 -13 19451 1327.87 7
 -1 4 -13 14753.6 1103.57 10
 -1 -4 13 17324.5 1395.09 9
 1 -4 -13 16616.9 1185.84 10
 1 -4 -14 4674.7 665.275 10
 1 -4 -14 5605.86 729.507 7
 -1 4 -14 5534.52 755.067 3
 -1 4 -14 5836.02 677.41 10
 1 -4 -15 58986.6 2597.97 7
 -1 4 -15 55859.5 2595.08 3
 1 -4 -15 51283.1 2438.98 10
 -1 4 -15 52210.3 2380.28 10
 1 -4 -16 1620.06 442.642 7
 1 -4 -16 1787.91 453.277 10
 -1 4 -16 1120.79 376.569 10
 -1 4 -16 1780.77 494.888 3
 -1 4 -17 2923.15 550.109 3
 1 -4 -17 3737.52 559.889 7
 -1 4 -17 3472.42 489.51 10
 1 -4 -17 4082.13 596.645 10
 -1 4 -18 1897.21 417.675 3
 1 -4 -18 1653.14 343.335 7
 -1 4 -18 2137.88 352.957 10
 1 -4 -18 1812.78 372.588 10
 -1 4 -19 5756.34 545.548 3
 1 -4 -19 5802.1 570.138 10
 1 -4 -19 5867.32 537.999 7
 1 -4 -20 1191.52 233.281 10
 1 4 20 433.026 216.526 4
 -1 5 20 340.058 159.344 4
 -1 5 19 934.955 271.777 4
 1 5 -19 811.841 221.273 7
 -1 -5 -19 1214.83 287.386 10
 -1 -5 -19 1001.73 262.822 9
 -1 -5 -18 3554.85 492.377 9
 -1 -5 -18 3788.9 514.847 10
 1 5 -18 3491.25 478.662 7
 -1 5 18 4565.57 583.871 4
 1 5 -18 3330.3 425.83 10
 1 5 -17 7573.66 751.26 7
 1 5 -17 6311.98 635.8 10
 -1 -5 -17 7555.55 774.566 10
 -1 5 17 7568.51 796.463 4
 1 5 -16 1103.87 294.667 10
 1 5 -16 1216.88 429.15 7
 -1 -5 -16 1076.23 376.375 10
 1 5 -15 7685.83 752.665 10
 1 5 -15 7733.58 884.981 7
 -1 -5 -15 7054.81 800.593 10
 1 5 -14 229.108 317.153 7
 -1 -5 -14 287.369 276.101 10
 1 5 -14 522.481 301.165 10
 1 5 -13 64230.9 2932.08 7
 1 5 -13 62502.8 2627 10
 -1 -5 -13 60081.9 2706.23 10
 -1 -5 -12 17233.8 1224.65 10
 1 5 -12 15503.6 1142.03 10
 1 -5 12 18553.6 2470.46 1
 -1 -5 -11 24263.9 1472.04 10
 1 -5 11 25885.2 2716.39 1
 -1 -5 -10 6789.44 1407.98 2
 1 -5 10 8328.9 1511.36 1
 1 -5 9 62129.7 4173.23 1
 -1 -5 -9 54343.9 3904.24 2
 -1 -5 -8 42145 3232.93 2
 -1 -5 -7 130518 6167.86 2
 -1 -5 -6 51542 3392.3 2
 -1 -5 -5 2224.65 793.994 2
 1 -5 5 1344.23 676.107 1
 1 5 -5 3451.1 594.078 2
 1 -5 4 60217.1 3501.84 1
 1 -5 3 170521 6748.73 1
 1 -5 2 221869 8045.75 1
 1 -5 1 264692 9183.25 1
 1 -5 0 7157.41 1076.71 1
 -1 -5 0 6735.47 1145.3 1
 -1 -5 1 232083 8896.51 1
 1 -5 -1 258711 8809.81 1
 1 -5 -2 225402 7996.67 1
 -1 -5 2 205628 8046.38 1
 -1 -5 3 177628 7059.88 1
 1 -5 -3 179164 6919.83 1
 -1 -5 4 51616.9 3203.85 1
 -1 5 -4 57990.6 3363.02 2
 -1 -5 5 2610.59 778.128 1
 -1 5 -5 2260.41 776.722 2
 -1 5 -6 49226.3 3149.22 2
 -1 -5 6 40712.3 2854.54 1
 -1 5 -7 121735 5731.16 2
 -1 -5 7 123930 5598.5 1
 -1 -5 8 43208.8 2995.08 1
 -1 5 -8 41847.1 3075.46 2
 -1 -5 9 71765.3 4006.39 1
 -1 5 -9 60096.8 3929.11 2
 1 -5 -10 9470.7 876.939 7
 -1 -5 10 8215.31 868.215 9
 -1 -5 11 26144.6 1677.66 9
 1 -5 -11 24168.3 1502.88 7
 1 -5 -12 17340.4 1158.78 10
 1 -5 -12 17543.4 1279.92 7
 -1 -5 12 19077.3 1441.25 9
 1 -5 -13 64039.6 2661.87 10
 1 -5 -13 65931.1 2837.04 7
 -1 -5 13 58234 2870.22 9
 -1 5 -13 60271.8 2723.26 7
 -1 5 -14 423.958 348.449 3
 1 -5 -14 31.7358 205.044 10
 1 -5 -14 266.61 362.749 7
 -1 5 -15 7180.47 824.086 3
 1 -5 -15 8199.66 888.649 7
 1 -5 -15 6808.17 755.405 10
 -1 5 -16 869.265 394.773 3
 1 -5 -16 1234.59 392.786 7
 1 -5 -16 907.127 365.408 10
 1 -5 -17 7884.03 747.692 7
 1 -5 -17 6535.41 669.78 10
 -1 5 -17 7642.59 741.089 3
 -1 5 -18 3662.44 471.793 3
 1 -5 -18 3119.26 437.159 7
 1 -5 -18 3974.41 463.173 10
 1 -5 -19 1273.91 266.988 10
 1 5 19 1183.94 283.06 4
 -1 5 -19 1074.98 250.295 3
 1 -5 -19 1192.93 231.999 7
 1 -5 -20 519.626 170.465 9
 -1 -6 -19 700.572 178.115 9
 -1 6 19 1102.4 230.124 4
 -1 -6 -18 8685.42 686.19 9
 -1 -6 -18 7526.31 632.458 10
 1 6 -18 6116.88 567.845 7
 -1 6 18 8824.63 714.301 4
 -1 -6 -17 4769.07 566.586 10
 -1 -6 -17 5163.17 607.021 9
 1 6 -17 6110.77 643.175 7
 -1 6 17 5256.43 647.7 4
 1 6 -16 4821.43 673.098 7
 -1 6 16 5586.66 685.397 4
 -1 -6 -16 5762.87 658.563 10
 -1 -6 -15 2693.31 503.457 10
 1 6 -15 1158.41 333.152 10
 1 6 -15 1722.22 489.635 7
 -1 6 15 1927.86 513.922 4
 1 6 -14 2543.09 431.757 10
 1 6 -14 2756.45 571.518 7
 -1 6 14 3986.15 645.211 4
 -1 -6 -14 2573.46 521.894 10
 -1 6 13 19714.2 1486.3 4
 -1 -6 -13 19110.8 1326.89 10
 -1 -6 -12 26279 1598.13 10
 -1 -6 -12 30064.1 1616.78 7
 -1 -6 -11 9094.99 834.921 7
 1 -6 11 7287.62 1740.43 1
 -1 -6 -11 8493.22 840.705 10
 -1 -6 -10 9927.94 864.387 7
 -1 -6 -10 9171.88 818.328 10
 1 -6 10 7856.54 1694.72 1
 1 -6 9 -162.871 523.927 1
 1 -6 8 6257.71 1258.21 1
 1 -6 7 15800.2 1983.98 1
 1 -6 6 31328.1 2756.72 1
 1 6 -5 33019.9 2261.7 2
 1 -6 5 41032.2 3055.56 1
 1 -6 4 1768.82 745.599 1
 1 -6 3 53390.3 3453.87 1
 1 -6 2 31517.2 2571.73 1
 1 -6 1 56462.2 3498.67 1
 1 -6 0 8206.41 1325.65 1
 1 -6 -1 53679.8 3423.56 1
 -1 -6 1 47907.6 3438.57 1
 1 -6 -2 34201.6 2667.62 1
 -1 -6 2 30538.1 2662.45 1
 -1 -6 3 54010.2 3619.09 1
 1 -6 -3 56570.5 3573.41 1
 -1 6 -4 1976.22 763.467 2
 -1 -6 4 1957.07 681.033 1
 -1 -6 5 41020.8 3052.96 1
 -1 6 -5 34636.5 2872.88 2
 -1 6 -6 28940.9 2577.82 2
 -1 -6 6 33879.6 2820.31 1
 -1 6 -7 13504.6 1735.44 2
 -1 -6 7 11687.9 1657.31 1
 -1 6 -8 2969.77 977.697 2
 -1 -6 8 4599.94 995.613 1
 -1 -6 9 357.938 307.99 9
 -1 -6 9 1265.06 690.054 1
 1 -6 -9 522.732 296.183 7
 -1 6 -9 -355.037 515.825 2
 1 -6 -10 9435.62 926.174 7
 -1 -6 10 9381.87 957.021 9
 -1 -6 11 7930.75 892.204 9
 1 -6 -11 7944.93 863.848 7
 -1 -6 12 25336.2 1699.93 9
 1 -6 -12 27683.6 1670.91 7
 1 -6 -13 22566.5 1509.38 7
 -1 6 -13 22116.8 1442.49 7
 -1 -6 13 22645.1 1593.65 9
 -1 6 -14 2703.58 513.881 7
 -1 -6 14 2681.69 525.912 6
 1 -6 -14 3999.86 611.01 7
 -1 6 -14 3188.35 598.403 3
 -1 6 -15 3316.39 558.079 3
 1 -6 -15 1746.47 466.248 7
 1 -6 -16 4996.91 635.622 7
 -1 6 -16 5277.98 622.624 3
 -1 6 -17 5535.72 586.186 3
 1 -6 -17 4845.21 576.633 7
 1 6 17 4844.67 588.767 4
 -1 6 -18 6889.54 568.468 3
 1 6 18 8382.19 683.275 4
 1 -6 -18 8262.49 651.742 7
 1 6 19 844.936 217.912 4
 1 -6 -19 820.743 228.716 9
 -1 7 18 778.746 220.641 4
 1 7 -18 211.16 136.559 7
 -1 -7 -18 734.388 240.013 9
 -1 7 17 10960.6 819.526 4
 1 7 -17 10468.4 772.002 7
 -1 -7 -17 9305.43 682.565 10
 -1 -7 -17 10873.2 816.968 9
 1 7 -16 18775.3 1203.43 7
 -1 -7 -16 20448.9 1242.06 9
 -1 7 16 21799.9 1288.12 4
 -1 -7 -16 17320 1086.04 10
 -1 7 15 13886.1 1092.35 4
 -1 -7 -15 13970.2 1085.82 9
 -1 -7 -15 13557.4 1004.85 10
 1 7 -15 14000.5 1112.86 7
 1 7 -14 1901.14 511.881 7
 -1 -7 -14 2546.18 467.737 10
 -1 7 14 1920.35 494.872 4
 -1 -7 -14 2248.03 471.04 9
 -1 7 13 26578 1660.39 4
 -1 -7 -13 29104.4 1568.66 7
 -1 -7 -13 24346.9 1492.46 10
 -1 -7 -12 11381.4 965.596 7
 -1 -7 -12 11616.3 980.951 10
 -1 7 12 11957.7 1078.2 4
 -1 -7 -11 17217 1229.34 7
 -1 7 11 15257.5 1261.58 4
 1 -7 11 23806.9 2919.17 1
 1 -7 10 16373.9 2324.83 1
 -1 7 10 13820.2 1154.44 4
 -1 -7 -10 13978.6 1078.58 7
 1 -7 9 40092 3663.4 1
 -1 -7 -9 38550.4 1955.85 7
 -1 7 9 38112.6 2018.07 4
 1 -7 8 15016.2 2212.8 1
 -1 7 8 18697.4 1239.71 4
 -1 -7 -8 13381.2 1029.74 7
 -1 -7 -8 12323.6 1055.64 9
 -1 -7 -8 14039.7 1095.92 11
 -1 -7 -7 52781 2383.12 9
 1 -7 7 55877.1 4209.35 1
 1 -7 6 12826.6 1949.81 1
 1 -7 5 113178 6035.17 1
 1 -7 4 5388.94 1290.09 1
 1 -7 3 20819.7 2236.46 1
 1 -7 2 15317.1 1907.93 1
 1 -7 1 2058.57 840.162 1
 1 -7 0 3274.61 1016.29 1
 1 -7 -1 4305.38 1015.59 1
 -1 -7 1 1956.35 885.756 1
 -1 -7 2 21843.3 2463.08 1
 1 -7 -2 21886.2 2440.45 1
 -1 -7 3 26575.2 2720.14 1
 -1 7 -4 7622.72 1407.51 2
 -1 -7 4 7384.76 1451.4 1
 -1 -7 5 114844 6015.82 1
 -1 7 -5 94974.5 5377.39 2
 -1 7 -6 12729.4 1775.94 2
 -1 -7 6 11111.4 1749.21 1
 1 -7 -7 50630.9 2366.09 7
 -1 -7 7 52452.7 4008.72 1
 -1 -7 7 52921.6 2409.45 8
 -1 7 -7 51435.8 3763.17 2
 -1 -7 8 14188.7 2051.18 1
 -1 7 -8 13620.4 1109 4
 1 -7 -8 16843 1208.91 7
 -1 -7 8 15456.7 1176.05 9
 -1 7 -8 17149.9 2094.12 2
 1 -7 -9 38584.4 2010.47 7
 -1 -7 9 35926.2 1975.97 9
 1 -7 -10 13245.9 1155.35 7
 -1 -7 10 15815.3 1254.57 9
 1 -7 -11 16398.9 1275.88 7
 -1 -7 11 17150 1356.63 9
 1 -7 -12 13483.2 1124.18 7
 -1 -7 12 10613.9 1051.88 9
 1 7 13 24120.3 1533.55 4
 1 -7 -13 32079.1 1792.04 7
 -1 -7 13 26645.3 1722.67 9
 -1 7 -14 3417.88 512.667 7
 -1 7 -14 2189.5 438.833 3
 -1 -7 14 2506.2 485.814 6
 1 -7 -14 1858.77 457.748 7
 1 7 14 2382.08 456.955 4
 -1 7 -15 14593.3 1031.17 3
 1 7 15 13290.9 1024.89 4
 1 -7 -15 13726.2 1079.65 7
 1 -7 -16 19670.2 1196.94 7
 1 7 16 16597.5 1101 4
 -1 7 -16 19140.1 1108.93 3
 1 -7 -17 13388.2 899.114 9
 -1 7 -17 10474 704.181 3
 1 -7 -17 12492 842.388 7
 1 7 17 9501.45 735.169 4
 1 7 18 628.406 207.712 4
 1 -7 -18 471.278 173.02 7
 1 -7 -18 691.058 249.008 9
 1 -7 -19 6529.28 465.359 9
 -1 -8 -18 340.605 152.898 9
 -1 8 18 367.43 127.914 4
 -1 -8 -17 2474.04 370.859 9
 -1 8 17 1643.48 311.825 4
 1 8 -17 2039.25 315.726 7
 -1 -8 -16 495.911 279.394 9
 1 8 -16 698.121 271.515 7
 -1 8 16 672.479 253.7 4
 -1 -8 -15 13042 1000.33 9
 -1 8 15 13903.6 1013.9 4
 1 8 -15 13806.7 1031.04 7
 1 8 -14 4137.48 630.062 7
 -1 8 14 4132.52 617.34 4
 -1 -8 -14 3376.82 572.175 9
 -1 -8 -13 5489.65 723.713 9
 -1 -8 -13 5241.59 649.474 7
 -1 8 13 4961.51 686.1 4
 -1 -8 -12 2030.46 507.672 9
 -1 -8 -12 1660.07 400.852 7
 -1 8 12 2347.15 510.65 4
 -1 -8 -11 21814.8 1503.92 9
 -1 -8 -11 23704.2 1476.9 7
 -1 8 11 22998.5 1520.97 4
 -1 -8 -10 4361.74 645.771 7
 -1 8 10 5540.91 729.815 4
 -1 -8 -10 5552.7 761.159 9
 -1 -8 -9 1200.25 451.914 9
 -1 8 9 1226.3 409.867 4
 1 -8 9 1319.87 892.009 1
 -1 -8 -9 1816.54 459.016 7
 -1 8 8 4576.32 630.634 4
 1 -8 8 5380.53 1495.66 1
 -1 -8 -8 5252.99 717.707 9
 -1 -8 -8 3933.4 640.971 7
 -1 -8 -7 31159.5 1756.21 9
 1 -8 7 28446.8 1655.97 8
 -1 -8 -7 27670.6 1658.52 7
 -1 8 7 29618.7 1663.44 4
 1 -8 7 37331.8 3496.65 1
 1 -8 6 1872.3 472.087 8
 -1 -8 -6 1185.49 407.791 9
 -1 -8 -6 1336.05 385.345 7
 -1 8 6 1607.69 372.86 4
 1 -8 6 1408.93 886.264 1
 1 -8 5 1174.07 747.869 1
 -1 -8 -5 644.438 290.522 9
 1 -8 5 1279.07 374.682 8
 -1 -8 -5 883.641 426.039 7
 -1 -8 -4 9759.94 877.997 9
 1 -8 4 10934.4 1794.01 1
 1 -8 3 12300.7 2021.23 1
 1 -8 2 22585.6 2562.09 1
 1 -8 1 4639.43 1097.58 1
 1 -8 0 -45.0892 552.363 1
 1 -8 -1 3531.26 1127.11 1
 1 -8 -2 16042.2 2224.59 1
 -1 -8 3 17327.1 2411.84 1
 -1 8 -4 11082.3 1705.32 2
 -1 -8 4 10170.3 923.608 8
 -1 -8 4 5958.21 1457.79 1
 1 -8 -4 10499.9 957.286 7
 -1 8 -5 -214.115 258.162 2
 1 -8 -5 311.255 289.575 7
 -1 -8 5 160.263 262.766 8
 -1 -8 5 -659.747 713.129 1
 -1 -8 5 455.574 279.591 9
 -1 -8 6 698.928 325.001 9
 -1 -8 6 -1796.3 1058.57 1
 1 -8 -6 386.822 299.311 7
 -1 -8 6 1142.23 466.823 8
 1 -8 -6 1141.03 394.976 9
 -1 8 -6 1714.39 693.972 2
 -1 8 -7 31111.6 3049.63 2
 -1 -8 7 29120.2 1732.93 9
 1 -8 -7 31962.7 1721.84 9
 -1 -8 7 30390.9 1793.66 8
 1 -8 -7 31925.1 1822.07 7
 -1 -8 7 28819 3239.37 1
 -1 -8 8 5686.41 1333.92 1
 -1 -8 8 5408.14 771.465 9
 1 -8 -8 4862.36 685.817 9
 1 -8 -8 5525.03 767.845 7
 1 -8 -9 1475.74 492.026 7
 -1 -8 9 1025.5 406.526 9
 -1 -8 10 5392.81 733.782 9
 1 -8 -10 5632.55 743.345 7
 1 -8 -11 23506.3 1556.72 7
 -1 -8 11 20553.9 1485.48 9
 1 8 12 2465.46 474.168 4
 1 -8 -12 1445.48 435.794 7
 -1 -8 12 2622.16 524.004 9
 1 8 13 5359.32 644.284 4
 1 -8 -13 5793.65 746.39 7
 -1 -8 13 6264.65 772.897 9
 -1 -8 14 2790.11 505.981 6
 -1 8 -14 3159.16 513.913 3
 1 8 14 3811.68 520.635 4
 -1 8 -14 2898.12 459.198 7
 1 -8 -14 4395.7 639.478 7
 1 -8 -14 4897.06 654.172 9
 1 -8 -15 13413.4 998.884 9
 1 -8 -15 12437.1 959.63 7
 1 8 15 11820.1 877.836 4
 -1 -8 15 10847 860.114 6
 -1 8 -15 13561 892.012 3
 1 8 16 213.014 201.589 4
 1 -8 -16 412.058 256.684 9
 1 -8 -16 337.832 250.977 7
 1 -8 -17 1722.79 306.349 7
 1 -8 -17 2169.69 346.648 9
 1 -8 -18 629.767 183.516 9
 -1 -9 -17 475.862 167.412 9
 -1 -9 -16 1625.23 330.049 9
 1 9 -16 1463.5 269.399 7
 -1 9 16 1879.89 306.066 4
 -1 9 15 17250.1 1046.59 4
 1 9 -15 17851.7 1115.6 7
 -1 -9 -15 21094.5 1181.37 9
 -1 9 14 10122.4 830.254 4
 1 9 -14 10555.8 901.997 7
 -1 -9 -14 10488 893.32 9
 -1 9 13 1777.91 391.75 4
 -1 -9 -13 1206.79 430.077 9
 -1 9 12 1361.1 378.465 4
 -1 -9 -12 1419.08 469.588 9
 -1 -9 -12 1339.44 407.06 7
 -1 -9 -11 28333.6 1703.08 9
 -1 9 11 27024.6 1605.99 4
 -1 -9 -11 27329.5 1611.05 7
 -1 -9 -10 26478.8 1679.14 9
 -1 -9 -10 25962.8 1629.6 7
 -1 9 10 28255.3 1647.06 4
 -1 -9 -9 -134.011 325.077 9
 -1 -9 -9 265.339 305.089 7
 -1 9 9 697.521 361.507 4
 -1 -9 -8 10319.4 1042.55 7
 1 -9 8 14885.7 2610.35 1
 -1 -9 -8 10974.5 1049.51 9
 -1 9 8 12905.1 1072.69 4
 -1 -9 -7 9924.03 994.213 9
 -1 9 7 10872 966.858 4
 -1 -9 -7 10132.5 1002.05 7
 1 -9 7 11519.3 1041.95 8
 1 -9 7 11524 2197.62 1
 -1 9 6 21392.6 1380.79 4
 1 -9 6 23682.6 1519.78 8
 1 -9 6 28542.5 3332.4 1
 -1 -9 -6 23124.9 1511.06 9
 1 -9 5 2020.68 923.28 1
 1 -9 5 506.449 349.385 8
 -1 -9 -5 605.452 372.523 9
 -1 9 5 1844.1 393.992 4
 1 -9 4 5311.08 686.91 8
 -1 -9 -4 4825.16 654.434 9
 -1 9 4 5077.05 627.932 4
 1 -9 4 5727.72 1475 1
 1 -9 3 3764.19 1157.21 1
 -1 -9 -3 3095.19 538.306 9
 1 -9 3 2974.4 517.477 8
 -1 9 3 4262.29 528.543 4
 -1 -9 -3 2082.58 474.713 8
 1 -9 2 37416.2 1978.92 8
 1 -9 2 40113.7 3820.99 1
 -1 -9 -2 37151.9 1964.41 9
 -1 -9 -2 38950.2 1979.86 8
 1 -9 1 11987.7 2182.53 1
 -1 -9 -1 11656.2 1006.85 9
 1 -9 1 11869.4 1049.45 8
 -1 -9 -1 10713.1 977.228 8
 1 -9 0 5373.21 1433.44 1
 -1 -9 0 5346.87 684.23 8
 -1 -9 0 5022.24 684.786 9
 1 -9 0 5545.23 736.575 8
 -1 -9 1 11544.4 1027.61 8
 -1 -9 1 11274.1 989.06 9
 1 -9 -1 11885.1 2077.55 1
 -1 -9 2 35270.5 1881.63 8
 -1 -9 2 34176.6 1875.8 9
 -1 -9 3 2082.11 439.643 9
 -1 -9 3 2463.66 554.897 8
 1 -9 -3 2291.34 518.371 7
 1 -9 -3 2692.01 462.792 9
 -1 -9 4 4913.68 718.641 8
 1 -9 -4 4186.36 691.248 7
 1 -9 -4 5861.61 659.056 9
 -1 9 -4 5131.26 1347.78 2
 -1 -9 4 5091.7 697.904 9
 -1 -9 5 1209.64 431.147 9
 -1 -9 5 572.959 759.033 1
 1 -9 -5 780.375 306.654 9
 -1 -9 5 863.465 395.559 8
 1 -9 -5 732.88 293.608 7
 -1 9 -5 -1222.43 706.427 2
 1 -9 -6 22678.8 1567.94 7
 -1 -9 6 22126 1523.42 8
 -1 9 -6 26015.2 2831.68 2
 -1 -9 6 24135.7 2952.15 1
 1 -9 -6 21177.9 1406.48 9
 -1 -9 6 22890.8 1520.41 9
 -1 -9 7 10709.4 2215.1 1
 -1 -9 7 11220.3 1046.14 9
 1 -9 -7 10925.4 1064.69 7
 1 -9 -7 12095.8 1020.06 9
 -1 -9 7 12575 1147.37 8
 1 -9 -8 12280.9 1131.77 7
 1 -9 -8 11648.2 1030.13 9
 -1 -9 8 13762.5 1161.09 9
 -1 -9 9 1092.24 452.522 9
 1 -9 -9 487.079 302.614 9
 1 -9 -9 1068.94 435.142 7
 1 -9 -10 28297.9 1669.06 9
 -1 -9 10 27334.9 1710.95 9
 1 -9 -10 26959.8 1724.77 7
 1 -9 -11 27433.8 1640.23 9
 1 -9 -11 27245.6 1708.47 7
 -1 -9 11 29069.1 1744.64 9
 1 -9 -12 1958.03 472.113 9
 -1 -9 12 3002.1 579.191 9
 1 -9 -12 1561.39 431.865 7
 -1 -9 13 1270.47 441.012 9
 1 -9 -13 1596.86 417.26 7
 1 -9 -13 2102.98 452.033 9
 1 -9 -14 10076.3 866.285 7
 -1 -9 14 10919.4 883.429 6
 -1 9 -14 8126.98 709.057 7
 1 -9 -14 11046.1 877.566 9
 1 -9 -15 19422.1 1115.84 9
 1 -9 -15 19381.7 1129.87 7
 -1 -9 15 15554.5 973.803 6
 1 -9 -16 1399.31 302.318 9
 1 -9 -16 1577.31 293.047 7
 1 -9 -17 6.17615 122.209 9
 -1 -10 -16 397.903 164.974 9
 -1 10 15 936.058 223.317 4
 1 10 -15 1163.78 270.107 7
 -1 -10 -15 1951.59 333.997 9
 -1 -10 -14 1313.27 337.914 9
 1 10 -14 1425.15 340.662 7
 -1 10 14 1298.54 268.594 4
 -1 -10 -13 4020.48 552.219 9
 -1 10 13 4730.57 526.166 4
 -1 10 12 14566.8 1018.97 4
 -1 -10 -12 16890.6 1174.71 9
 -1 -10 -11 2274.35 513.189 9
 -1 10 11 1666.21 402.137 4
 -1 -10 -10 520.836 348.715 9
 -1 10 10 702.01 261.069 4
 -1 10 9 18532.6 1270.46 4
 -1 -10 -9 18313 1368.25 9
 -1 -10 -8 31845.3 1856.54 9
 -1 10 8 30607.6 1705.36 4
 1 -10 7 4249.56 696.633 8
 -1 -10 -7 3828.76 643.234 9
 -1 10 7 4299.49 586.558 4
 -1 10 6 99.1497 267.73 4
 -1 -10 -6 728.35 383.201 9
 1 -10 6 623.746 412.565 8
 1 -10 5 29100.3 1766.16 8
 -1 -10 -5 29368.9 1770.75 9
 -1 10 5 29389.9 1618.92 4
 -1 -10 -5 26854.3 1721.14 8
 1 -10 5 32073.2 3752.56 1
 -1 -10 -4 91557.5 3729.74 9
 1 -10 4 102542 6815.93 1
 1 -10 4 96806 3801.54 8
 -1 -10 -4 95027.9 3775.11 8
 -1 10 4 95679.3 3550.56 4
 -1 -10 -3 6546.47 801.614 8
 1 -10 3 8142.71 909.341 8
 1 -10 3 3998.28 1468.68 1
 -1 -10 -3 7577.59 856.977 9
 -1 -10 -2 11318.2 1056.85 8
 1 -10 2 13132.1 2282.28 1
 -1 -10 -2 12024.7 1080.83 9
 1 -10 2 14289.8 1179.87 8
 -1 -10 -1 8901.95 928.478 8
 1 -10 1 8180.35 896.182 8
 -1 -10 -1 8684.85 932.272 9
 1 -10 1 6019.52 1778.49 1
 1 -10 0 50378.6 2470.36 8
 -1 -10 0 51869.9 2481.06 9
 -1 -10 0 51233.8 2455.71 8
 -1 -10 1 9539.23 973.379 9
 -1 -10 1 10426.8 1010.92 8
 1 -10 -1 9612.29 1003.24 8
 1 -10 -2 12363.6 1033.35 9
 -1 -10 2 12861.9 1123.65 9
 -1 -10 2 13438.7 1152.82 8
 -1 -10 3 6139.29 762.941 9
 -1 -10 3 6587.05 814.418 8
 -1 10 -3 8032.3 1661.19 2
 1 -10 -3 6428.51 755.53 9
 -1 -10 4 90473.2 3677.64 9
 1 -10 -4 93679.7 3586.56 9
 -1 -10 4 93219.6 3739.29 8
 -1 10 -4 89366.2 5958.92 2
 -1 10 -5 26801.6 3059.83 2
 -1 -10 5 27707.7 1729.41 9
 1 -10 -5 31396.3 1734.67 9
 -1 -10 5 29642.8 1824.27 8
 1 -10 -5 29281.6 1871.32 7
 -1 -10 6 500.191 412.376 8
 1 -10 -6 155.312 301.045 9
 -1 -10 6 333.718 322.929 9
 1 -10 -6 607.499 434.298 7
 -1 -10 7 4531.37 686.245 9
 1 -10 -7 4108.58 632.229 9
 1 -10 -7 4073.76 706.618 7
 1 -10 -8 29343.3 1861.25 7
 1 -10 -8 29520.4 1706.31 9
 -1 -10 8 29525.1 1784.88 9
 -1 -10 9 18740.6 1366.95 9
 1 -10 -9 17147.9 1364.82 7
 1 -10 -9 16921 1239.13 9
 1 -10 -10 881.187 375.512 9
 -1 -10 10 1028.75 373.931 9
 1 -10 -10 454.477 357.669 7
 1 -10 -11 2267.75 504.855 7
 1 -10 -11 1893.54 462.848 9
 -1 -10 11 1619.32 405.762 9
 1 -10 -12 16237.5 1114.01 9
 -1 -10 12 15698.8 1126.61 9
 1 -10 -12 15846.5 1179.52 7
 -1 10 -13 3802.68 491.474 7
 -1 -10 13 4109.29 563.319 6
 1 -10 -13 4858.63 604.825 7
 1 -10 -13 4815.78 565.687 9
 1 -10 -14 1887.16 376.794 7
 1 -10 -14 1773.34 358.811 9
 -1 -10 14 1368.12 303.071 6
 1 -10 -15 2048.68 305.458 9
 -1 -10 15 1251.9 338.383 6
 1 -10 -16 140.014 127.97 9
 -1 -11 -15 1317.08 220.354 9
 1 11 -14 1347.6 258.373 7
 -1 -11 -14 1554.31 303.255 9
 1 -11 14 952.735 198.184 6
 -1 -11 -13 3274.68 465.408 9
 -1 11 13 2435.8 315.764 4
 1 11 -13 2359.44 401.725 7
 -1 -11 -12 737.547 324.74 9
 -1 11 12 1175.85 250.837 4
 -1 11 11 1963.5 354.843 4
 -1 -11 -11 3046.52 495.308 9
 -1 -11 -11 2422.14 415.582 8
 -1 11 10 6383.27 632.611 4
 -1 -11 -10 5904.76 647.543 8
 -1 -11 -10 7430.09 796.113 9
 -1 -11 -9 17870.2 1231.4 8
 -1 11 9 16982.8 1103.07 4
 -1 -11 -9 17910.9 1281.21 9
 -1 -11 -8 10766.5 972.195 8
 -1 -11 -8 10058 978.162 9
 -1 11 8 10758.4 872.362 4
 -1 11 7 1182.53 342.121 4
 -1 -11 -7 988.499 403.637 9
 -1 -11 -7 1113.98 385.193 8
 1 -11 6 6730.18 820.883 8
 -1 -11 -6 5736.92 803.308 9
 -1 -11 -6 8620.68 918.872 8
 -1 -11 -5 8914.63 956.07 9
 1 -11 5 10611 1056.02 8
 -1 -11 -5 10449.1 1047.34 8
 -1 -11 -4 11254.3 1061.56 8
 1 -11 4 11326.8 1072.65 8
 -1 -11 -4 9569.15 1002.08 9
 -1 -11 -3 13618.3 1176.17 9
 1 -11 3 14070.1 1204.69 8
 -1 -11 -3 12947 1144.74 8
 -1 -11 -2 15071.7 1224.51 8
 -1 -11 -2 15667.7 1250.8 9
 1 -11 2 13546.5 1184.73 8
 1 -11 1 7547.51 910.023 8
 -1 -11 -1 9071.14 963.877 8
 -1 -11 -1 8056.95 907.499 9
 -1 -11 0 9743.14 985.778 8
 1 -11 0 8352.62 924.942 8
 -1 -11 0 7605.88 882.134 9
 -1 -11 1 7575.97 863.752 9
 1 -11 -1 8222.65 936.535 8
 -1 -11 1 7188.23 847.411 8
 -1 -11 2 16641.1 1318.96 8
 1 -11 -2 16207.2 1333.84 8
 -1 -11 2 17359.9 1333.21 9
 1 -11 -2 17343.7 1240.66 9
 1 -11 -3 13457.9 1087.95 9
 1 -11 -3 12266.5 1156.18 8
 -1 -11 3 14319.5 1220.17 8
 -1 -11 3 14734.1 1206.59 9
 -1 -11 4 10884.5 1043.81 9
 1 -11 -4 11693 1000.39 9
 -1 -11 4 10979.4 1094.57 8
 1 -11 -4 13351.3 1196.91 8
 -1 -11 5 9931.09 1022.14 8
 -1 -11 5 9334.55 950.544 9
 1 -11 -5 9719.45 913.146 9
 -1 -11 6 7059.77 820.524 9
 -1 -11 6 6719.38 876.773 8
 1 -11 -6 6567.16 762.061 9
 1 -11 -7 1582.53 436.187 9
 -1 -11 7 1751.38 474.759 9
 -1 -11 8 11524.4 1021.43 9
 1 -11 -8 9714.66 891.525 9
 -1 -11 9 16365.5 1210.25 9
 1 -11 -9 17553.6 1187.61 9
 -1 -11 10 6280.42 713.753 9
 1 -11 -10 6979.72 715.327 9
 1 -11 -11 2460.35 423.973 9
 -1 -11 11 2351.38 454.789 9
 1 -11 -12 426.275 238.606 9
 -1 -11 12 547.582 263.342 9
 -1 -11 12 773.646 328.754 6
 1 -11 -13 3292.8 401.454 9
 -1 -11 13 1737.72 331.913 6
 -1 -11 14 1087.79 233.982 6
 1 -11 -14 1348.71 243.71 9
 1 -11 -14 1306.68 262.403 8
 -1 -12 -13 4916.04 432.509 9
 1 12 -13 3218.93 353.865 7
 1 12 -12 1167.37 278.762 7
 -1 -12 -12 1187.03 276.849 9
 -1 -12 -11 7328.72 658.5 9
 -1 -12 -10 3401.57 514.475 9
 -1 -12 -10 2710.23 388.835 8
 -1 -12 -9 1861.77 354.174 8
 -1 -12 -9 1760.82 424.131 9
 -1 -12 -8 7619.83 796.552 9
 -1 -12 -8 7851.84 755.059 8
 -1 -12 -7 2946.62 500.209 8
 -1 -12 -7 2514.64 523.629 9
 -1 -12 -6 17074.6 1219.55 8
 1 -12 6 17908.2 1281.95 8
 -1 -12 -6 17893.4 1293.57 9
 -1 -12 -5 437.841 365.255 9
 1 -12 5 407.205 371.126 8
 -1 -12 -5 80.3882 352.273 8
 1 -12 4 13335.4 1160.68 8
 -1 -12 -4 14399.6 1163.42 8
 -1 -12 -4 14514.7 1186.5 9
 -1 -12 -3 2553.21 547.262 9
 -1 -12 -3 3071.86 609.836 8
 1 -12 3 3038.59 630.553 8
 -1 -12 -2 4098.07 662.871 9
 1 -12 2 4107.03 683.356 8
 -1 -12 -2 3255 662.313 8
 -1 -12 -1 527.82 426.182 8
 1 -12 1 818.066 414.927 8
 -1 -12 -1 620.124 399.446 9
 -1 -12 0 20458.9 1452.73 8
 -1 -12 0 21006.9 1449.75 9
 1 -12 0 21074.3 1499.65 8
 -1 -12 1 418.302 415.646 8
 -1 -12 1 682.476 413.738 9
 1 -12 -1 748.749 459.212 8
 -1 -12 2 3799.58 677.204 8
 -1 -12 2 4045.03 622.351 9
 1 -12 -2 4323.41 694.267 8
 1 -12 -3 2530.58 461.637 9
 1 -12 -3 3635.36 672.122 8
 -1 -12 3 2399.44 581.907 8
 -1 -12 3 2837.13 549.378 9
 1 -12 -4 15865.1 1124.86 9
 1 -12 -4 14419.7 1221.53 8
 -1 -12 4 14779.4 1234.9 8
 -1 -12 4 15029.3 1173.67 9
 1 -12 -5 766.518 293.262 9
 1 -12 -5 769.291 400.396 8
 -1 -12 5 329.536 300.549 9
 -1 -12 5 270.863 373.775 8
 -1 -12 6 16123.5 1202.16 9
 1 -12 -6 14564.7 1084.34 9
 1 -12 -6 17377.7 1289.15 8
 1 -12 -7 2712.12 542.69 8
 -1 -12 7 2955.65 545.48 9
 1 -12 -7 2506.59 467.231 9
 1 -12 -8 7630.24 743.863 9
 -1 -12 8 8931.3 817.464 9
 1 -12 -8 9537.39 904.797 8
 1 -12 -9 2145.53 391.577 9
 1 -12 -9 1921.84 452.013 8
 -1 -12 9 1942.22 401.658 9
 -1 -12 10 2570.78 415.816 9
 1 -12 -10 3102.12 432.953 9
 1 -12 -10 2782.39 464.79 8
 1 -12 -11 7309.65 601.915 9
 1 -12 -11 7651.74 672.03 8
 -1 -12 11 6513.43 649.484 6
 -1 -12 12 1225.07 281.434 6
 1 -12 -12 1066.68 240.077 9
 1 -12 -12 1727.9 302.971 8
 -1 -12 13 2915.24 341.965 6
 1 -12 -13 4377.16 375.136 8
 -1 -13 -11 2609.39 328.203 9
 -1 -13 -10 8803.85 658.305 9
 -1 -13 -9 10680.5 688.035 8
 -1 -13 -9 10724.9 784.52 9
 -1 -13 -8 2284.37 376.668 8
 -1 -13 -8 2277.39 404.366 9
 -1 -13 -7 4741.03 586.59 9
 -1 -13 -7 3812.09 494.61 8
 -1 -13 -6 5484.18 628.464 8
 -1 -13 -6 5761.24 665.899 9
 -1 -13 -5 6586.13 726.351 9
 1 -13 5 6152.43 704.421 8
 -1 -13 -5 6302.4 688.7 8
 1 -13 4 6675.88 760.696 8
 -1 -13 -4 7534.55 783.909 9
 -1 -13 -4 7249.52 768.705 8
 -1 -13 -3 1357.11 423.27 8
 -1 -13 -3 2612.48 477.333 9
 1 -13 3 1577.95 437.848 8
 1 -13 2 1502.16 469.584 8
 -1 -13 -2 1158.25 410.427 9
 -1 -13 -2 1409.22 422.164 8
 -1 -13 -1 3044.96 539.03 9
 1 -13 1 3675.06 616.01 8
 -1 -13 -1 3482.73 585.132 8
 -1 -13 0 3034.37 528.316 9
 -1 -13 0 2585.45 549.308 8
 1 -13 0 2999.82 576.993 8
 -1 -13 1 3934.78 583.466 9
 1 -13 -1 3604.83 612.832 8
 -1 -13 1 3239.9 598.287 8
 1 -13 -2 864.422 405.179 8
 -1 -13 2 736.296 410.873 8
 -1 -13 2 1302.34 396.987 9
 -1 -13 3 2024.02 528.038 8
 1 -13 -3 1769.87 463.436 8
 -1 -13 3 2309.57 456.264 9
 -1 -13 4 7453.76 744.664 9
 -1 -13 4 7556.76 829.063 8
 1 -13 -4 7320.38 803.634 8
 -1 -13 5 5762.66 642.883 9
 1 -13 -5 6593.52 739.235 8
 -1 -13 6 5043.14 578.225 9
 1 -13 -6 6235.06 710.916 8
 1 -13 -6 5091.31 550.783 9
 -1 -13 7 4339.16 513.085 9
 1 -13 -7 4583.45 584.613 8
 1 -13 -7 3474.27 454.105 9
 1 -13 -8 2533.82 437.246 8
 1 -13 -8 2215.05 347.392 9
 1 -13 -9 9845.49 672.111 9
 1 -13 -9 11041.2 795.721 8
 1 -13 -10 6474.88 478.255 9
 1 -13 -10 8999.87 645.744 8
 -1 -13 10 5832.5 559.45 6
 1 -13 -11 2341 301.849 8
 -1 -13 11 1416.26 278.672 6
 -1 -14 -8 489.057 188.145 9
 -1 -14 -7 2848.9 333.986 8
 -1 -14 -7 3392.2 393.149 9
 -1 -14 -6 7269.36 587.28 8
 -1 -14 -6 7845.06 630.853 9
 -1 -14 -5 2894.3 407.234 9
 -1 -14 -5 3414.06 436.048 8
 -1 -14 -4 954.033 313.497 8
 -1 -14 -4 661.701 235.747 9
 1 -14 3 3347.68 505.077 8
 -1 -14 -3 3737.76 503.074 9
 -1 -14 -3 4235.8 522.602 8
 -1 -14 -2 12148.1 892.426 9
 -1 -14 -2 13823.8 967.858 8
 1 -14 2 13606.8 983.427 8
 -1 -14 -1 230.657 287.919 8
 1 -14 1 191.507 244.391 8
 -1 -14 -1 -402.705 241.208 9
 -1 -14 0 9032 795.046 8
 1 -14 0 8409.11 793.563 8
 -1 -14 0 7782.24 702.429 9
 -1 -14 1 242.336 224.487 9
 -1 -14 1 -2.37688 257.111 8
 1 -14 -1 -290.352 284.436 8
 1 -14 -2 13889.4 994.056 8
 -1 -14 2 12132.1 880.01 9
 -1 -14 2 14760 1011.5 8
 1 -14 -3 3936.96 540.249 8
 -1 -14 3 4282.51 467.151 9
 -1 -14 3 3296.33 396.985 6
 1 -14 -4 1556.58 362.468 8
 -1 -14 4 1151.04 291.767 9
 1 -14 -5 3966.88 501.311 8
 -1 -14 5 3060.21 410.425 6
 -1 -14 5 3455.88 425.025 9
 1 -14 -6 9684.95 728.186 8
 -1 -14 6 7018.82 605.894 6
 -1 -14 7 2530.25 355.471 6
 1 -14 -7 3248.26 425.878 8
 -1 -14 8 695.221 191.965 6
 1 -14 -8 929.264 217.631 8
 -1 -14 9 2333.76 285.004 6
 -1 -15 -3 721.152 202.308 8
 -1 -15 -2 7389.06 564.166 8
 1 -15 1 1092.61 271.282 8
 1 -15 0 5968.12 535.138 8
 1 -15 -1 1292.91 271.834 8
 1 -15 -2 7833.17 606.914 8
 1 -15 -3 261.115 194.94 8
 1 -15 -4 7735.99 558.665 8
 1 -15 -5 4595.95 404.671 8
 -2 0 0 9979.81 818.314 2
 -2 0 1 263116 7783.14 2
 -2 0 -1 271007 8171.89 2
 -2 0 -2 51586.9 2422.89 2
 -2 0 2 47716.6 1837.77 2
 -2 0 3 184381 5277.69 2
 -2 0 -3 175775 6266.17 2
 -2 0 4 175824 5024.5 2
 -2 0 -4 179523 6351.18 2
 -2 0 -5 7911.95 1085.52 2
 -2 0 -6 55967.7 3150.18 2
 -2 0 -7 138797 5908.56 2
 -2 0 -8 36795.3 2750.69 2
 -2 0 -9 -319.122 499.973 2
 -2 0 -10 4314.35 1010.08 2
 -2 0 -11 45629.2 3481.18 2
 -2 0 -12 6836.05 740.1 3
 -2 0 -12 8048.23 1503.43 2
 2 0 -12 6694.37 716.485 3
 2 0 -12 5728.99 723.766 7
 -2 0 -12 7102.9 788.783 10
 -2 0 -13 3342.31 645.954 10
 2 0 -13 5579.5 720.62 10
 2 0 -13 4929.74 710.13 7
 -2 0 -13 5948.9 1395.72 2
 2 0 -13 5598.6 704.651 3
 -2 0 -13 4169.94 661.03 3
 -2 0 -14 3191.27 614.544 3
 2 0 -14 4200.16 679.392 7
 2 0 -14 3753.77 638.467 10
 -2 0 -14 1878.84 841.74 2
 -2 0 -14 3823.96 667.966 10
 -2 0 -15 54.7304 306.451 10
 -2 0 -15 -832.894 380.043 3
 2 0 -15 165.975 250.671 7
 2 0 -15 -47.8796 362.551 10
 -2 0 -16 345.697 362.617 10
 2 0 -16 472.943 378.832 7
 -2 0 -16 383.002 393.229 3
 2 0 -16 653.166 411.659 10
 2 0 -17 827.57 397.187 10
 2 0 -17 993.721 415.75 7
 -2 0 -17 903.432 411.891 10
 -2 0 -17 926.685 433.087 3
 2 0 -18 780.044 334.487 7
 -2 0 -18 896.657 384.65 3
 -2 0 -18 1226.53 408.842 10
 2 0 -18 1122.37 395.619 10
 2 0 -19 1628.79 405.954 10
 -2 0 19 1376.2 319.988 4
 -2 0 -19 1310.92 365.852 10
 -2 0 -19 987.958 337.534 3
 2 0 -19 1329.86 353.62 7
 2 0 -20 2338.62 325.81 7
 2 0 -20 3510.34 428.713 10
 -2 0 -20 2290.9 374.111 10
 -2 0 20 1887.36 309.667 4
 2 0 -21 1799.07 235.512 10
 2 1 -21 2195.33 266.803 10
 -2 -1 -20 10129.5 751.647 10
 2 1 -20 9826.89 672.907 7
 2 1 -20 10410.5 718.747 10
 -2 1 20 9934.85 661.931 4
 -2 1 19 3601.76 484.761 4
 -2 -1 -19 3981.08 544.945 10
 2 1 -19 3385.51 489.622 10
 2 1 -19 3043.04 456.779 7
 -2 -1 -18 1209.85 416.095 10
 -2 -1 -18 1429.81 404.946 3
 2 1 -18 1881.5 422.386 7
 2 1 -18 1771.55 416.826 10
 2 1 -17 2694.94 554.004 10
 -2 -1 -17 1979.55 507.953 10
 2 1 -17 2867.29 563.171 7
 -2 -1 -17 2212.69 543.68 3
 -2 -1 -16 3200.64 639.643 3
 2 1 -16 4743.01 692.163 10
 -2 -1 -16 3878.38 648.125 10
 2 1 -16 3021.87 604.024 7
 2 1 -15 12680.7 1126.4 10
 -2 -1 -15 10599.1 1030.97 3
 -2 -1 -15 12525.8 1141.29 10
 2 1 -15 12281.1 1116.34 7
 -2 -1 -14 5280.67 1352.69 2
 -2 -1 -14 6971.89 857.715 10
 2 1 -14 6957.03 834.055 10
 2 1 -14 7576.46 790.202 3
 2 1 -14 5703.53 788.292 7
 -2 -1 -14 5914.79 761.397 3
 -2 -1 -13 14320.3 1964.54 2
 -2 -1 -13 13253.4 1105.08 3
 -2 -1 -13 13611.1 1152.79 10
 2 1 -13 12415 1101.24 7
 2 1 -13 11490.7 984.412 3
 2 1 -13 10648.8 1034.74 10
 -2 -1 -12 18938.7 2295.54 2
 -2 -1 -12 21056.9 1378.93 3
 2 1 -12 23549.1 1508.52 7
 -2 -1 -12 22710 1465.62 10
 2 1 -12 22745.2 1332.24 3
 2 1 -11 5877.02 692.514 7
 -2 -1 -11 6039.12 1278 2
 -2 -1 -10 1033.91 640.11 2
 -2 -1 -9 141769 6414.79 2
 -2 -1 -8 27346.1 2329.26 2
 -2 -1 -7 30111.7 2359.69 2
 -2 -1 -6 106511 4756.82 2
 -2 -1 -5 209259 7414.48 2
 -2 -1 -4 112720 4560.88 2
 -2 -1 -3 54758.4 2715.98 2
 -2 -1 -2 248205 7867.85 2
 -2 1 1 243301 7242.17 2
 -2 -1 -1 223949 7228.39 2
 -2 1 0 22535 1406.77 2
 -2 -1 0 22683.3 1261.89 2
 -2 1 -1 225712 7474.98 2
 -2 -1 1 241070 6894.56 2
 -2 1 -2 233621 7819.14 2
 -2 -1 2 246891 6804.85 2
 -2 1 -3 55655.5 2800.34 2
 -2 1 -4 111061 4589.01 2
 -2 1 -5 200687 7281.3 2
 -2 1 -6 105255 4755.69 2
 -2 1 -7 38548 2727.38 2
 -2 1 -8 28039.7 2384.3 2
 -2 1 -9 141820 6482.22 2
 -2 1 -10 501.424 476.438 2
 2 -1 -11 5181.01 654.68 7
 -2 1 -11 5557.04 1244.62 2
 2 -1 -12 24141.6 1503.95 10
 2 -1 -12 22741.7 1470.06 7
 -2 1 -12 23202.2 2534.56 2
 -2 1 -12 24212.7 1503.28 3
 -2 1 -12 22641.1 1464.78 10
 -2 1 -13 12415.8 1092.85 3
 -2 1 -13 14416.5 2061.02 2
 2 -1 -13 13135.8 1116.09 7
 -2 1 -13 11823.7 1085.8 10
 2 -1 -13 13672.4 1120.34 10
 -2 1 -14 6047.32 802.45 3
 -2 1 -14 7437.71 859.722 10
 2 -1 -14 5583.62 780.248 7
 2 -1 -14 6101.35 759.817 10
 -2 1 -15 11387.2 1074.01 10
 -2 1 -15 10585.7 1054.54 3
 2 -1 -15 11799.9 1056.26 10
 2 -1 -15 12161.3 1088.05 7
 -2 1 -16 4525.44 699.874 3
 2 -1 -16 4033.58 627.458 7
 2 -1 -16 4888.75 691.758 10
 -2 1 -16 4126.97 698.811 10
 -2 1 -17 2395.9 526.759 10
 2 -1 -17 1632.85 453.825 10
 -2 1 -17 2207.37 520.8 3
 2 -1 -17 2245.31 492.336 7
 -2 1 -18 1279.04 400.74 3
 2 -1 -18 1191.25 383.702 10
 -2 1 -18 1776.46 442.17 10
 2 -1 -18 1638.86 383.044 7
 -2 1 -19 3117.83 460.127 10
 -2 1 -19 3813.78 511.305 3
 2 -1 -19 3907.43 505.584 7
 -2 -1 19 3785.76 453.9 4
 2 -1 -19 4649.37 559.562 10
 2 -1 -20 11296.8 697.412 7
 -2 1 -20 8680.5 643.714 10
 2 -1 -20 11328 744.744 10
 -2 2 20 4008.17 413.911 4
 2 2 -20 4271.69 424.8 7
 2 2 -20 4607.84 455.377 10
 -2 -2 -20 3659.28 458.114 10
 2 2 -19 6487.72 620.6 7
 -2 2 19 6510.76 642.302 4
 2 2 -19 7369.39 686.73 10
 -2 -2 -19 7032.33 718.225 10
 2 2 -18 2961 490.118 10
 -2 2 18 2335.86 454.245 4
 2 2 -18 2141.82 438.409 7
 -2 -2 -18 1265.99 418.498 10
 2 2 -17 1849.8 421.125 10
 2 2 -17 1776.09 433.707 7
 -2 -2 -17 1779.66 463.278 3
 -2 -2 -17 1719.9 485.824 10
 -2 -2 -16 15358.7 1194.26 3
 2 2 -16 14131.9 1205.88 7
 2 2 -16 15886.4 1232.29 10
 -2 -2 -16 16703.3 1293.23 10
 -2 -2 -15 2738.59 570.583 3
 2 2 -15 2564.62 573.171 10
 -2 -2 -15 2875.53 594.327 10
 2 2 -15 2848.92 496.107 3
 2 2 -15 2568.19 576.224 7
 -2 -2 -14 1101.29 625.983 2
 -2 -2 -14 2108.72 568.563 10
 2 2 -14 1606.68 443.541 7
 -2 -2 -14 1902.88 483.508 3
 2 2 -14 1222.51 476.875 10
 2 2 -13 3762.58 668.241 7
 -2 -2 -13 4224.03 1109.29 2
 -2 -2 -13 4658.36 654.807 3
 -2 -2 -13 3855.24 621.231 10
 -2 -2 -12 54089.4 2460 10
 -2 -2 -12 45474.8 3716.35 2
 2 2 -12 51547.1 2445.63 7
 -2 -2 -12 48565 2268.39 3
 -2 -2 -11 -169.686 305.683 10
 2 2 -11 162.712 289.335 7
 -2 -2 -11 -252.969 470.065 2
 -2 -2 -10 7013.43 1344.57 2
 -2 -2 -9 29485.6 2574.51 2
 -2 -2 -8 42190.8 2968.14 2
 -2 -2 -7 91076.7 4526.43 2
 -2 -2 -6 1851.36 664.851 2
 -2 -2 -5 26595.2 1999.31 2
 -2 -2 -4 91374.3 3999.26 2
 -2 -2 -3 110223 4411.28 2
 -2 -2 -2 26597.2 1672.03 2
 -2 -2 -1 10612.1 941.539 2
 -2 -2 0 17216.2 1111.21 2
 -2 2 -1 7562.81 928.005 2
 -2 -2 1 9231.27 680.859 2
 2 -2 -2 29009.5 1411.29 1
 -2 2 -2 25394.9 1823.64 2
 -2 2 -3 106319 4305.24 2
 2 -2 -3 95276.1 3242.33 1
 -2 2 -4 92438.1 4182.98 2
 -2 2 -5 27704.5 2145.91 2
 -2 2 -6 2045.41 676.698 2
 -2 2 -7 95702 4751 2
 -2 2 -8 46897.1 3229.56 2
 -2 2 -9 30126.3 2618.97 2
 -2 2 -10 8481.79 1447.05 2
 -2 2 -11 985.285 528.557 2
 2 -2 -11 576.138 309.658 7
 -2 -2 11 88.9942 260.129 9
 -2 2 -12 47092.4 2328.66 10
 2 -2 -12 54490 2452.69 7
 -2 2 -12 49119.2 3827.23 2
 2 -2 -12 53718.8 2392.06 10
 2 -2 -13 3174.18 578.751 7
 2 -2 -13 2887.95 608.903 10
 -2 2 -13 4355.08 686.117 3
 -2 2 -13 2345.16 895.898 2
 -2 2 -13 4183.89 653.725 10
 -2 2 -14 1532.25 469.772 10
 2 -2 -14 2425.65 564.281 10
 -2 2 -14 1534.49 529.988 3
 2 -2 -14 1755.41 437.724 7
 -2 2 -15 3142.45 579.099 10
 2 -2 -15 3148.59 571.408 10
 2 -2 -15 3012.92 580.071 7
 -2 2 -15 2713.2 598.944 3
 2 -2 -16 14251 1144.24 10
 -2 2 -16 15304.9 1234.33 3
 2 -2 -16 16578.9 1243.51 7
 -2 2 -16 14893.9 1171.78 10
 2 -2 -17 1442.52 447.472 10
 -2 2 -17 1840.34 495.354 3
 -2 2 -17 2088.49 469.498 10
 2 -2 -17 1187.56 382.665 7
 2 -2 -18 2249.21 455.811 10
 -2 2 -18 1784.19 506.074 3
 2 -2 -18 1994.49 417.064 7
 -2 2 -18 2181.49 429.428 10
 -2 2 -19 6200.64 628.955 3
 2 -2 -19 7186.65 651.476 7
 2 -2 -19 5871.49 612.929 10
 -2 2 -19 5420.12 564.476 10
 2 -2 -20 3955.17 424.653 10
 2 -2 -20 3082.28 354.746 7
 -2 2 -20 4179.78 453.649 3
 -2 2 -20 3117.08 333.432 10
 -2 3 20 1771.34 271.874 4
 2 3 -20 1847.73 275.454 10
 2 3 -20 2011.85 281.896 7
 -2 -3 -20 1847.8 312.202 10
 -2 -3 -19 4741.51 567.077 10
 2 3 -19 4416.76 503.51 7
 -2 3 19 4956.64 548.369 4
 2 3 -19 4615.9 507.656 10
 -2 -3 -18 4486.46 496.767 9
 -2 3 18 3393.88 528.018 4
 2 3 -18 2970.66 490.113 7
 2 3 -18 3750.54 533.045 10
 -2 -3 -18 2375.07 465.432 10
 -2 3 17 7236.13 799.447 4
 2 3 -17 7477.19 799.785 7
 -2 -3 -17 7117.28 842.302 10
 2 3 -17 6432.51 721.33 10
 -2 -3 -16 646.348 366.639 10
 2 3 -16 469.901 373.215 7
 -2 -3 -16 288.243 306.972 3
 2 3 -16 372.827 352.474 10
 -2 -3 -15 9479.67 939.65 3
 2 3 -15 9034.1 949.484 7
 2 3 -15 8628 907.539 10
 -2 -3 -15 7327.91 891.266 10
 2 3 -14 35095.5 1972.75 10
 -2 -3 -14 35592.3 2019.09 10
 -2 -3 -14 37853.5 1953.73 3
 2 3 -14 35043.4 2041.17 7
 -2 -3 -13 5498.09 762.362 10
 -2 -3 -13 6014.68 736.398 3
 2 3 -13 4989.75 751.948 7
 -2 -3 -13 3823.42 1321.87 2
 -2 -3 -12 4185.44 591.665 3
 -2 -3 -12 4506.91 1153.18 2
 2 3 -12 3183.91 657.377 7
 -2 -3 -12 3464.1 576.823 10
 -2 -3 -11 3508.17 545.883 3
 -2 -3 -11 4568.25 1155.04 2
 2 3 -11 3071.43 526.962 7
 -2 -3 -11 3962.17 596.45 10
 -2 -3 -10 39078.8 3207.35 2
 -2 -3 -9 10997.1 1584.51 2
 -2 -3 -8 15868.7 1856.4 2
 -2 -3 -7 8289.89 1289.68 2
 -2 -3 -6 9499.39 1333.63 2
 -2 -3 -5 9479.95 1241.25 2
 -2 -3 -4 11034 1265.91 2
 -2 -3 -3 2971.03 696.174 2
 -2 -3 -2 15818.3 1329.28 2
 -2 -3 -1 10839.9 1016.73 2
 -2 -3 0 17262.8 1213.81 2
 -2 -3 1 10194.7 848.523 2
 2 -3 -1 9778.26 989.977 1
 -2 3 -2 18181 1622.97 2
 2 -3 -2 15089.4 1159.02 1
 -2 3 -3 3576.88 846.328 2
 2 -3 -3 3398.27 537.439 1
 -2 3 -4 13443.9 1493.95 2
 -2 3 -5 9405.46 1296.93 2
 -2 3 -6 9399.58 1356.43 2
 -2 -3 6 7901.04 969.653 1
 -2 3 -7 9332.17 1392.5 2
 -2 3 -8 19879.7 2114.39 2
 -2 3 -9 10210.2 1566.17 2
 -2 3 -10 41122.1 3334.35 2
 -2 3 -11 2946.35 919.411 2
 2 -3 -11 3157.09 540.288 7
 -2 -3 11 3908.54 632.022 9
 2 -3 -11 2882.39 486.472 10
 -2 3 -12 3907.01 1125.03 2
 2 -3 -12 5086.73 683.978 7
 -2 -3 12 4938.55 767.642 9
 2 -3 -12 3999.24 560.241 10
 -2 3 -12 4955.35 666.025 10
 2 -3 -13 4743.63 683.647 7
 2 -3 -13 6208.96 699.048 10
 -2 3 -13 6238.71 726.785 10
 -2 3 -14 30460.2 1860.29 3
 2 -3 -14 36624.5 1963.35 7
 2 -3 -14 31398.4 1758.42 10
 -2 3 -14 34109.1 1830.87 10
 -2 3 -15 7146.26 873.126 3
 2 -3 -15 6983.94 921.825 7
 -2 3 -15 8702 869.388 10
 2 -3 -15 7457.98 806.858 10
 -2 3 -16 664.903 424.474 3
 -2 3 -16 771.292 328.442 10
 2 -3 -16 357.083 310.792 7
 2 -3 -16 839.171 308.576 10
 2 -3 -17 6724.73 741.899 7
 -2 3 -17 6724 785.193 3
 -2 3 -17 6918.3 691.957 10
 2 -3 -17 7158.61 750.234 10
 -2 3 -18 3677.79 553.011 3
 2 -3 -18 3601.51 508.236 7
 -2 3 -18 2658.79 409.898 10
 2 -3 -18 3399.46 500.124 10
 -2 3 -19 4917.31 534.137 3
 -2 3 -19 4491.39 446.217 10
 2 -3 -19 5071.15 539.726 7
 2 -3 -19 4897.97 522.859 10
 -2 3 -20 1478.13 285.023 3
 2 -3 -20 1410.74 239.716 7
 2 -3 -20 1230.1 221.619 10
 -2 4 20 13520 733.723 4
 -2 -4 -20 12237.2 734.729 10
 -2 4 19 105.321 171.769 4
 2 4 -19 1.5741 201.36 10
 2 4 -19 138.355 167.984 7
 -2 -4 -19 133.233 227.361 10
 -2 -4 -18 15699.9 950.549 9
 -2 -4 -18 15490.5 1086.42 10
 2 4 -18 16531.7 1062.74 7
 2 4 -18 12459 913.026 10
 -2 4 18 18148.1 1131.07 4
 -2 4 17 3329.51 552.266 4
 -2 -4 -17 2846.42 453.515 9
 2 4 -17 2122.71 417.256 10
 -2 -4 -17 2418.86 508.616 10
 2 4 -17 2652.19 499.116 7
 -2 4 16 19408.3 1393.46 4
 2 4 -16 21380.9 1439.99 7
 2 4 -16 20873.9 1339 10
 -2 -4 -16 22047.7 1462.2 10
 2 4 -15 747.566 350.633 10
 -2 -4 -15 997.884 401.999 10
 2 4 -15 758.339 387.97 7
 2 4 -14 3652.79 662.289 7
 2 4 -14 2533.57 534.706 10
 -2 -4 -14 3244.97 569.476 3
 -2 -4 -14 2914.47 592.047 10
 -2 -4 -13 -16.8094 278.89 10
 2 4 -13 295.132 362.557 7
 -2 -4 -13 694.787 834.097 2
 -2 -4 -13 111.247 259.35 3
 2 4 -12 4705.11 748.031 7
 -2 -4 -12 4291.75 1241.05 2
 -2 -4 -12 4379.25 648.132 10
 -2 -4 -12 4933.66 638.583 3
 -2 -4 -11 40959.6 1931.85 3
 -2 -4 -11 36904.4 3357.73 2
 -2 -4 -11 37822.2 1992.25 10
 -2 -4 -10 2028.64 424.793 10
 -2 -4 -10 989.717 489.712 2
 -2 -4 -9 31280 2824.61 2
 -2 -4 -8 1002.07 581.654 2
 -2 -4 -7 43999.7 3165.65 2
 -2 -4 -6 50598.6 3264.32 2
 -2 -4 -5 41261.7 2801.64 2
 -2 -4 -4 46551.6 2844.16 2
 -2 -4 -3 194166 7109.44 2
 -2 -4 -2 50495.9 2762.52 2
 -2 -4 -1 213645 7305.23 2
 2 -4 0 187.047 405.134 1
 2 -4 -1 182586 6551.66 1
 2 -4 -2 45818.5 2521.95 1
 2 -4 -3 194446 6832.71 1
 -2 4 -3 200619 7661.78 2
 -2 4 -4 48405 3145.93 2
 2 -4 -4 46037.4 2515.33 1
 -2 -4 5 38893 2622.8 1
 -2 4 -5 43466.5 2996.12 2
 -2 4 -6 48810.2 3281.9 2
 -2 -4 6 42242.7 2740.28 1
 -2 4 -7 42178.9 3193.96 2
 -2 4 -8 591.298 486.308 2
 -2 4 -9 31405.6 2848.36 2
 2 -4 -10 1714.2 400.67 7
 -2 -4 10 1813.87 491.676 9
 -2 4 -10 1282.65 793.377 2
 -2 -4 11 36313.7 2098.35 9
 -2 4 -11 34793.4 3200.26 2
 2 -4 -11 41658.3 2055.83 7
 2 -4 -11 40482.2 1872.02 10
 -2 -4 11 38164.8 2017.74 6
 2 -4 -12 3532.28 608.703 7
 -2 -4 12 4454.38 662.275 6
 -2 -4 12 4707.24 770.965 9
 -2 4 -12 5142.81 1464.88 2
 2 -4 -12 3674.93 586.018 10
 -2 -4 13 -71.8104 366.757 9
 2 -4 -13 -71.8685 250.995 10
 2 -4 -13 410.701 314.111 7
 2 -4 -14 2185.12 421.271 10
 2 -4 -14 3518.11 627.93 7
 -2 4 -15 1582.97 499.228 3
 2 -4 -15 840.894 384.25 10
 2 -4 -15 409.563 329.611 7
 2 -4 -16 21329.5 1413.09 7
 2 -4 -16 22225.4 1360.58 10
 -2 4 -16 21488.4 1439.41 3
 -2 4 -17 2279.32 482.53 3
 2 -4 -17 2903.87 466.644 10
 2 -4 -17 2766.46 488.58 7
 -2 4 -18 16163.9 1057.98 3
 2 -4 -18 16679.4 1074.17 7
 2 -4 -18 17387.1 1026.48 10
 -2 4 -19 109.295 224.174 3
 2 -4 -19 62.299 174.889 7
 2 -4 -19 17.6156 168.48 10
 -2 4 -20 13423.9 704.204 3
 -2 -5 -19 8215.3 646.031 10
 2 5 -19 9316.37 643.593 7
 -2 5 19 11819.7 740.628 4
 2 5 -19 9631.02 580.017 10
 2 5 -18 11036.7 836.584 7
 2 5 -18 10705.5 751.639 10
 -2 -5 -18 11865.1 779.604 9
 -2 5 18 13203.7 908.322 4
 -2 -5 -18 12249 886.432 10
 -2 -5 -17 14111.1 955.574 9
 2 5 -17 12177.9 978.17 7
 -2 -5 -17 12862.2 1013.41 10
 -2 5 17 15663.8 1095.45 4
 2 5 -17 12704.6 895.227 10
 -2 -5 -16 1188.4 417.829 10
 2 5 -16 840.386 323.34 10
 -2 -5 -16 -53.8246 226.993 9
 2 5 -16 765.741 407.298 7
 -2 5 16 475.731 331.175 4
 -2 -5 -15 4886.78 706.598 10
 -2 5 15 4711.4 688.405 4
 2 5 -15 5360.22 769.751 7
 2 5 -15 5815.01 682.634 10
 -2 -5 -14 11701.2 1065.23 10
 -2 5 14 10263.3 1062.22 4
 2 5 -14 10956.8 1084.67 7
 2 5 -14 12849.8 1026.68 10
 2 5 -13 20394.9 1531.6 7
 -2 -5 -13 20617.2 1428.68 10
 -2 5 13 19476.3 1460.96 4
 2 5 -13 17541.3 1287.21 10
 -2 5 12 1480.32 469.255 4
 -2 -5 -12 925.629 673.509 2
 -2 -5 -12 1300.04 357.918 10
 -2 -5 -11 37460.9 3593.29 2
 -2 -5 -11 43481.8 2149.09 10
 -2 -5 -10 175.819 224.569 3
 -2 -5 -10 529.852 295.846 11
 -2 -5 -10 -404.368 613.278 2
 -2 -5 -10 664.783 346.654 10
 -2 -5 -9 1439.52 1012.05 2
 -2 5 9 1963.17 466.264 4
 -2 -5 -8 33785.5 2961.87 2
 -2 -5 -7 9676.65 1543.22 2
 -2 -5 -6 8588.31 1352.92 2
 -2 -5 -5 22496.2 2143.57 2
 -2 -5 -4 110891 5155.68 2
 -2 -5 -3 19604.4 1834.94 2
 -2 -5 -2 46804.9 2831.23 2
 2 -5 2 42346.3 2846.94 1
 2 -5 1 6605.25 1100.55 1
 2 -5 0 30108.1 2262.83 1
 2 -5 -1 6346.75 1017.54 1
 2 -5 -2 42447.7 2701.58 1
 2 -5 -3 17494.2 1666.74 1
 -2 5 -3 20558 2079.56 2
 -2 5 -4 118658 5617.01 2
 2 -5 -4 104004 4820.44 1
 -2 5 -5 26758 2469.93 2
 -2 -5 5 22313.5 2188.62 1
 -2 -5 6 7106.53 1151.83 1
 -2 5 -6 8657.44 1506.28 2
 -2 -5 7 6079.59 1140.54 1
 -2 5 -7 8288.11 1552.89 2
 -2 5 -8 34142.8 3013.06 2
 -2 5 -9 2355.41 762.917 2
 -2 -5 9 1964.28 396.929 9
 -2 5 -9 1771.96 345.843 5
 2 -5 -9 1562.53 398.18 7
 -2 5 -9 1220.52 390.093 4
 -2 -5 10 378.132 323.561 9
 -2 5 -10 2201 836.447 2
 2 -5 -10 683.686 326.906 7
 -2 5 -11 44765.6 3716.16 2
 -2 -5 11 35500 2097.26 9
 2 -5 -11 40839.5 2083.25 7
 -2 -5 12 1182.22 445.643 6
 2 -5 -12 1606.49 444.207 7
 -2 -5 12 1484.14 494.336 9
 -2 -5 13 20468.6 1439.51 6
 2 -5 -13 22318.5 1500.01 7
 -2 -5 13 21563.4 1604.91 9
 2 -5 -14 11399.7 1064.27 7
 2 -5 -14 12155.8 974.096 10
 -2 5 -15 4689.53 701.067 3
 2 -5 -15 6003.48 745.215 7
 2 -5 -15 6189.19 688.965 10
 2 -5 -16 602.368 334.72 7
 2 -5 -16 397.455 229.129 10
 -2 5 -16 381.415 341.232 3
 2 -5 -17 13561.8 1006.45 7
 2 -5 -17 13655.9 895.176 10
 -2 5 -17 13232.3 990.551 3
 -2 5 -18 11455.4 823.391 3
 2 -5 -18 12567.9 875.098 7
 -2 5 -19 8318.01 593.821 3
 2 5 19 7381.16 567.919 4
 2 -5 -19 11524.5 694.194 7
 -2 6 19 1340.56 245.159 4
 2 6 -19 561.336 174.345 7
 -2 6 18 836.761 275.725 4
 -2 -6 -18 501.235 204.847 9
 -2 -6 -18 570.855 263.012 10
 2 6 -18 612.755 229.885 7
 2 6 -17 5649.56 611.832 7
 2 6 -17 6443.69 540.841 10
 -2 -6 -17 5876.75 624.874 10
 -2 6 17 6141.65 644.491 4
 -2 -6 -17 5553.39 560.625 9
 -2 6 16 1814.75 421.805 4
 -2 -6 -16 2078.75 435.099 10
 -2 -6 -16 1782.67 398.418 9
 2 6 -16 1746.79 412.291 7
 2 6 -16 1370.78 297.115 10
 -2 -6 -15 10263.5 902.974 9
 2 6 -15 10128.1 997.82 7
 -2 -6 -15 8961.6 912.384 10
 -2 6 15 9369.39 944.3 4
 2 6 -15 10072.6 810.072 10
 -2 6 14 2157.67 541.837 4
 -2 -6 -14 1804.1 462.085 9
 2 6 -14 1857.32 401.592 10
 -2 -6 -14 1883.15 447.105 10
 2 6 -14 2594.75 572.995 7
 -2 -6 -13 20368 1370.62 9
 -2 -6 -13 19682.6 1386.03 10
 2 6 -13 15922.4 1365.04 7
 -2 6 13 16868.1 1336.5 4
 2 6 -13 17179.4 1188.73 10
 -2 6 12 30625.5 1844.85 4
 -2 -6 -12 28106 1719.94 10
 -2 6 11 26750.2 1730.24 4
 2 -6 11 25945.1 3048.46 1
 -2 -6 -11 27468.8 1650.5 10
 -2 6 10 10334.3 988.727 4
 -2 -6 -10 10569.4 979.638 11
 -2 -6 -10 7434.69 836.826 10
 2 -6 10 8693.55 1783.97 1
 -2 -6 -9 8197.7 811.892 9
 -2 -6 -9 7662.34 816.958 10
 -2 -6 -9 7456.23 811.107 11
 -2 6 9 6442.9 795.729 4
 -2 -6 -9 6455.31 1613.59 2
 2 -6 9 11899.3 1894.38 1
 -2 -6 -8 64473.9 2699.09 9
 2 -6 8 70763.3 4753.03 1
 -2 -6 -8 60718.9 4351.6 2
 -2 6 8 63451.1 2754.45 4
 2 -6 7 10685.6 1774.07 1
 -2 -6 -7 12927.2 1856.03 2
 2 -6 6 35312.1 3075.9 1
 -2 -6 -6 35730.4 3056 2
 2 -6 5 1928.71 720.906 1
 2 -6 4 19343.2 2097.66 1
 2 -6 3 14454.2 1768.26 1
 2 -6 2 162970 7044.62 1
 2 -6 1 80269.8 4386.75 1
 2 -6 0 38851.6 2864.28 1
 2 -6 -1 85586.9 4542.91 1
 2 -6 -2 169628 7136.73 1
 2 -6 -3 15015.3 1748.01 1
 -2 6 -3 16181.4 2003.32 2
 -2 6 -4 18626.2 2217.5 2
 -2 6 -5 1867.84 866.78 2
 -2 6 -6 36026.8 3177.51 2
 -2 6 -7 10186.3 1647.04 2
 -2 -6 7 14292.9 1887.23 1
 2 -6 -8 60413.7 2671.74 7
 -2 6 -8 62486.5 4408.97 2
 -2 6 -8 63553.3 2698.75 4
 -2 6 -8 63716.4 2494.89 5
 -2 -6 8 62384.4 2741.74 9
 -2 6 -9 10672.6 1734.44 2
 -2 6 -9 10634.7 828.758 5
 -2 6 -9 7868.2 866.955 4
 -2 -6 9 7870.67 896.839 9
 2 -6 -9 7139.94 815.292 7
 2 -6 -10 11010.1 1025.68 7
 -2 -6 10 10107.5 1026.62 9
 -2 6 -10 6500.03 1485.97 2
 2 -6 -11 27010.3 1671.13 7
 -2 -6 11 27556.4 1766.37 9
 -2 -6 12 31408.3 1950.75 9
 2 -6 -12 31816.5 1865.4 7
 -2 -6 12 33756.4 1926.78 6
 -2 -6 13 17640.1 1323.58 6
 2 -6 -13 17532 1331.03 7
 -2 -6 13 16513 1374.44 9
 2 -6 -14 1702.81 479.295 7
 -2 -6 14 1657.56 514.922 9
 -2 -6 14 2030.97 473.736 6
 -2 6 -15 8997.95 896.074 3
 2 -6 -15 9201.48 886.269 7
 2 -6 -16 2514.73 479.623 7
 -2 6 -16 1429.16 404.148 3
 -2 6 -17 5940.94 602.261 3
 2 -6 -17 4809.63 571.447 7
 2 6 17 4308.1 500.711 4
 2 6 18 697.058 227.228 4
 -2 6 -18 753.614 250.195 3
 2 -6 -18 1219.49 271.723 7
 2 -6 -19 1002.24 208.348 9
 -2 7 18 230.907 155.806 4
 -2 -7 -18 417.009 142.88 9
 2 7 -18 318.877 147.284 7
 -2 7 17 5651.75 569.973 4
 2 7 -17 4872.46 531.337 7
 -2 -7 -17 4350.37 468.824 10
 -2 -7 -17 5920.1 541.438 9
 -2 -7 -16 3466.44 468.692 10
 2 7 -16 3710.66 520.384 7
 -2 -7 -16 4003.18 500.715 9
 -2 7 16 3497.16 518.583 4
 -2 -7 -15 3202.24 510.612 9
 -2 -7 -15 3350.69 503.692 10
 -2 7 15 3307.25 551.884 4
 2 7 -15 3346.74 562.137 7
 -2 -7 -14 801.539 358.104 9
 -2 -7 -14 1250.36 383.035 10
 -2 7 14 953.707 382.452 4
 2 7 -14 856.954 388.956 7
 -2 7 13 35384.4 1951.14 4
 -2 -7 -13 32420.9 1820.22 9
 -2 -7 -13 33291.1 1847.59 10
 -2 -7 -12 2612.03 537.867 9
 -2 -7 -12 2163.8 480.284 10
 -2 7 12 2043.96 529.706 4
 -2 7 11 246.536 309.434 4
 -2 -7 -11 986.11 396.486 9
 -2 -7 -11 385.562 273.553 11
 -2 -7 -11 309.866 336.937 10
 -2 -7 -10 4737.14 660.034 10
 2 -7 10 4862.09 1595.73 1
 -2 -7 -10 3290.09 589.628 9
 -2 7 10 3088.94 576.183 4
 -2 -7 -10 2921.17 587.609 11
 -2 7 9 8007.04 859.003 4
 2 -7 9 7622.4 1736.03 1
 -2 -7 -9 6371.26 779.13 9
 -2 -7 -9 6709.85 820.905 11
 -2 -7 -9 9552.7 867.232 10
 2 -7 8 978.157 769.74 1
 -2 7 8 1229.06 410.323 4
 -2 -7 -8 1616.91 457.142 9
 -2 -7 -8 1715.83 432.576 11
 -2 -7 -8 2349.27 452.072 10
 -2 -7 -7 35096.1 1857.63 9
 -2 -7 -7 35196.4 1951.52 11
 2 -7 7 41259.9 3580 1
 -2 7 7 33734.8 1828.03 4
 -2 7 6 4514.88 596.931 4
 2 -7 6 4282.75 1277.1 1
 -2 -7 -6 5128.46 664.761 11
 -2 -7 -6 5145.67 665.407 9
 2 -7 5 5223.62 1354.23 1
 2 -7 4 202.719 451.595 1
 2 -7 3 43428.6 3422.03 1
 2 -7 2 17757.9 2079.73 1
 2 -7 1 33531.7 2887.85 1
 2 -7 0 -110.671 469.311 1
 2 -7 -1 27205.9 2699.52 1
 2 -7 -2 18556.1 2173.18 1
 -2 7 -3 46575.5 3702.6 2
 2 -7 -3 47561.2 3576.12 1
 -2 7 -4 1002.73 761.33 2
 -2 7 -5 4966.09 1271.26 2
 -2 7 -6 4277.83 1281.31 2
 -2 -7 6 3889.98 598.502 9
 -2 -7 6 3962.29 645.346 8
 2 -7 -6 3863.93 599.775 7
 -2 -7 7 32797.4 1846.03 9
 -2 7 -7 36883.6 1659.63 5
 -2 7 -7 31782.5 1757.78 4
 2 -7 -7 32619.7 1835.47 7
 -2 7 -7 33703.2 3246.4 2
 -2 7 -8 1449.2 368.308 5
 -2 7 -8 1669.74 716.24 2
 2 -7 -8 1477.08 381.044 7
 -2 7 -8 1874.69 429.805 4
 -2 -7 8 1574.67 478.575 9
 -2 -7 9 5860.12 795.345 9
 -2 7 -9 7228.81 1522.05 2
 -2 7 -9 7927.22 760.506 5
 -2 7 -9 6676.81 794.567 4
 2 -7 -9 6582.43 814.026 7
 -2 -7 10 3765.45 656.298 9
 2 -7 -10 3975.03 641.127 7
 -2 -7 11 542.092 406.132 9
 2 -7 -11 744.763 406.656 7
 -2 -7 12 2193.91 542.393 6
 -2 -7 12 2260.15 560.222 9
 2 -7 -12 2531.97 563.76 7
 2 -7 -13 33049.8 1912.44 7
 -2 -7 13 36794.8 1986.41 6
 -2 -7 13 34869.8 2027.69 9
 -2 -7 14 909.552 434.635 9
 -2 -7 14 931.704 361.5 6
 2 -7 -14 890.934 415.791 7
 -2 -7 15 2538.83 458.73 6
 -2 7 -15 2661.57 496.534 3
 2 -7 -15 2421.55 474.784 7
 -2 7 -16 3430.53 494.528 3
 2 -7 -16 4261.11 549.892 7
 2 -7 -17 5763.36 558.493 9
 2 -7 -17 6505.22 599.967 7
 -2 7 -17 5127.17 502.596 3
 2 -7 -18 181.22 180.296 9
 2 -7 -18 -90.4667 135.698 7
 -2 7 -18 528.984 155.43 3
 2 8 -17 572.986 186.705 7
 -2 -8 -17 762.525 222.779 9
 -2 8 17 724.778 219.182 4
 -2 -8 -16 219.47 211.573 9
 2 8 -16 111.839 201.145 7
 -2 8 16 203.111 224.662 4
 -2 -8 -15 15216.4 1030.73 9
 2 8 -15 15843.1 1105.11 7
 -2 8 15 14739.2 1042.97 4
 -2 -8 -14 14539.5 995.084 10
 -2 8 14 14138.8 1074.91 4
 -2 -8 -14 14768.5 1083.53 9
 2 8 -14 15330 1173.71 7
 -2 -8 -13 2942.77 539.486 9
 -2 -8 -13 2946.34 480.263 10
 -2 8 13 2963.79 546.655 4
 -2 -8 -12 4203.38 665.456 9
 -2 8 12 3347.11 586.933 4
 -2 -8 -11 19152.7 1371.73 9
 -2 8 11 17303.1 1322.47 4
 -2 -8 -10 27198.2 1691.11 9
 -2 -8 -10 27250.8 1706.27 11
 -2 8 10 26574 1666.28 4
 -2 -8 -9 20954.3 1435 9
 2 -8 9 24129.9 3111.69 1
 -2 8 9 18492.9 1385.47 4
 -2 -8 -9 20114 1454.42 11
 -2 -8 -8 3244.12 657.231 11
 2 -8 8 4329.99 1208.95 1
 -2 -8 -8 3248.76 596.974 9
 -2 8 8 3886.35 649.034 4
 -2 -8 -7 3534.15 603.506 9
 2 -8 7 4286.87 1473.04 1
 2 -8 7 4332.51 625.837 8
 -2 8 7 4193.17 644.669 4
 -2 -8 -7 3564.66 674.322 11
 -2 -8 -6 19518.1 1339.33 9
 2 -8 6 20594.8 1323.36 8
 -2 8 6 17681.6 1284.11 4
 2 -8 6 20209.9 2654.27 1
 -2 -8 -6 19251.1 1457.74 11
 2 -8 5 43457 3906.92 1
 2 -8 5 43617.8 2084.07 8
 -2 -8 -5 44466.4 2326.68 11
 -2 -8 -5 42165.7 2143.08 9
 -2 8 5 44885.4 2143.93 4
 -2 -8 -4 22068.3 1441.99 9
 -2 8 4 25569.3 1489.84 4
 2 -8 4 25290.3 1483.53 8
 -2 -8 -4 24220.1 1616.81 11
 2 -8 4 25782.5 2871.52 1
 -2 -8 -3 41537.3 2029.07 9
 -2 8 3 39468.6 1939.11 4
 -2 -8 -3 38222.2 2107.71 11
 2 -8 3 37705.7 3509.24 1
 -2 -8 -2 39218.9 2002.85 9
 2 -8 2 45113.3 3718.88 1
 -2 -8 -2 42717.6 2210.84 11
 2 -8 1 6247.87 1352.71 1
 -2 -8 -1 5581.59 669.019 9
 2 -8 0 626.532 565.629 1
 -2 -8 1 4777.93 653.795 9
 2 -8 -1 6130.37 1304.05 1
 -2 -8 2 37619.6 1941.96 9
 2 -8 -2 34624.3 3287.56 1
 -2 -8 3 42816.3 2099.56 9
 -2 -8 3 43128.4 2080.41 8
 -2 8 -3 39740 3605.29 2
 2 -8 -3 38498.1 2045.54 7
 -2 -8 4 24072.4 1514.88 9
 2 -8 -4 22685.8 1489.27 7
 -2 8 -4 26248.9 2866.53 2
 -2 8 -4 26178.5 1462.78 4
 -2 -8 4 22333.3 1471.22 8
 -2 -8 5 47436.6 2250.81 8
 -2 8 -5 39126.1 3654.03 2
 -2 8 -5 41141.2 2030.31 4
 -2 -8 5 43773.4 2206.79 9
 2 -8 -5 41824.8 2172.81 7
 -2 8 -6 19985.3 1299.95 4
 2 -8 -6 17486.4 1178.97 9
 -2 8 -6 19470.1 1125.43 5
 -2 8 -6 19337 2485.69 2
 -2 -8 6 15820.4 1293.67 8
 2 -8 -6 16876.8 1305.74 7
 -2 -8 6 17923.1 1330.58 9
 -2 -8 7 4390.37 687.253 9
 -2 8 -7 2503.77 902.787 2
 2 -8 -7 5155.49 657.111 9
 -2 8 -7 3913.91 506.356 5
 -2 8 -7 4350.26 608.931 4
 2 -8 -7 4292.38 669.368 7
 -2 8 -8 3263.16 1156.85 2
 -2 8 -8 4551.93 529.39 5
 -2 -8 8 3348.39 656.466 9
 -2 8 -8 3573.21 599.969 4
 2 -8 -8 3860.43 641.788 7
 2 -8 -8 4680.31 629.696 9
 -2 -8 9 19398.1 1455.44 9
 -2 8 -9 20370.6 1400.73 4
 2 -8 -9 19015.4 1417.32 7
 2 -8 -10 26090.8 1689.22 7
 -2 -8 10 26542.7 1727.79 9
 2 -8 -11 18642.9 1405.57 7
 -2 -8 11 19914.6 1489.54 9
 -2 -8 12 2975.67 584.402 9
 2 -8 -12 4042.39 653.244 7
 -2 -8 12 3073.68 616.942 6
 -2 -8 13 2825.36 536.032 6
 -2 -8 13 3313.59 614.681 9
 2 -8 -13 2316.83 514.828 7
 -2 -8 14 14283.7 1138.38 9
 -2 8 -14 15052.1 1055.37 3
 2 -8 -14 15271.6 1071.13 9
 2 -8 -14 14271.8 1105.73 7
 -2 -8 14 14146.9 1078.81 6
 -2 -8 15 12855.7 926.029 6
 2 -8 -15 14564.1 983.813 9
 -2 8 -15 14885.8 968.188 3
 2 -8 -15 14836.9 1046.24 7
 2 -8 -16 90.6193 212.43 7
 2 -8 -16 260.158 212.985 9
 -2 8 -16 53.8386 167.603 3
 -2 8 -17 473.468 171.185 3
 2 -8 -17 820.111 214.191 9
 2 -8 -17 1140.73 254.137 7
 -2 -9 -16 1831.87 303.998 9
 -2 9 16 1572.14 275.181 4
 2 9 -16 1332.54 270.805 7
 -2 -9 -15 732.368 292.336 9
 -2 9 15 633.416 238.285 4
 2 9 -15 667.648 282.316 7
 -2 -9 -14 11871.2 893.652 9
 2 9 -14 10588 915.195 7
 -2 9 14 12326.5 908.821 4
 -2 -9 -13 25745.9 1495.92 9
 -2 9 13 28250.1 1539.29 4
 2 9 -13 28008.6 1651.62 7
 -2 9 12 12269.9 1028.44 4
 -2 -9 -12 12287.3 1036.02 9
 -2 -9 -11 7579.21 835.208 9
 -2 9 11 6464.03 774.662 4
 -2 -9 -10 7725.36 863.498 9
 -2 9 10 8543.06 886.047 4
 -2 -9 -9 24308.4 1603.21 9
 -2 9 9 23551.1 1527.89 4
 -2 -9 -8 7095.92 865.669 9
 -2 9 8 6638.04 794.089 4
 2 -9 7 11842.1 1045.17 8
 -2 -9 -7 11430.6 971.559 8
 2 -9 7 13657.9 2497.8 1
 -2 9 7 12877.8 1081.44 4
 -2 -9 -7 11942.8 1112.61 9
 -2 9 6 2205.63 498.811 4
 -2 -9 -6 2871.86 567.78 8
 -2 -9 -6 3395.62 607.439 9
 2 -9 6 2118.73 496.234 8
 2 -9 6 3461.61 1413.95 1
 2 -9 5 70178.2 5342.57 1
 -2 -9 -5 70502 3039.34 9
 -2 -9 -5 72238.6 2935.04 8
 2 -9 5 66444.4 2908.83 8
 -2 9 5 71230.2 2982.8 4
 -2 -9 -4 5754.36 757.636 9
 2 -9 4 5236.86 715.813 8
 -2 -9 -4 4703.91 659.818 8
 -2 9 4 5167.06 690.18 4
 2 -9 4 4334.93 1467.75 1
 2 -9 3 96496.2 6327.1 1
 -2 -9 -3 98887.4 3841.4 9
 2 -9 3 100708 3797.46 8
 -2 -9 -3 97338.9 3699.53 8
 -2 9 3 101046 3763.72 4
 -2 9 2 709.605 263.704 4
 2 -9 2 -2609.34 1114.8 1
 -2 -9 -2 314.495 319.034 8
 2 -9 2 1047.93 409.631 8
 -2 -9 -2 798.053 391.9 9
 -2 -9 -1 176877 5998.25 9
 2 -9 1 178092 9062.41 1
 -2 -9 -1 176928 5862.06 8
 2 -9 1 175836 5936.54 8
 -2 9 1 180894 5859.71 4
 2 -9 0 2037.59 984.448 1
 -2 -9 0 90.0344 321.737 9
 -2 -9 0 961.673 339.954 8
 2 -9 0 746.758 316.713 8
 -2 9 0 711.01 313.603 4
 -2 -9 1 174529 5914.44 8
 -2 -9 1 177192 6026.45 9
 -2 9 -1 184810 5878.21 4
 2 -9 -1 180461 9127.57 1
 -2 9 -2 1095.56 383.052 4
 -2 -9 2 1275.78 421.232 9
 -2 9 -2 2605.8 1001.48 2
 -2 -9 2 1057.98 430.56 8
 -2 -9 3 97014.3 3786.19 8
 2 -9 -3 91025.8 3820.62 7
 -2 9 -3 96371.5 6156.32 2
 -2 9 -3 100023 3650.09 4
 -2 -9 3 98982.6 3837.18 9
 -2 -9 4 4558.78 699.052 9
 -2 -9 4 4635.61 733.019 8
 2 -9 -4 4336.39 713.852 7
 -2 9 -4 4827.62 635.796 4
 -2 9 -4 3148.35 1127.73 2
 -2 9 -5 73094.3 5316.43 2
 -2 -9 5 68598.2 3039.4 9
 -2 -9 5 72576.9 3106.91 8
 2 -9 -5 67545.4 3083.65 7
 -2 9 -5 70123.3 2902.16 4
 -2 9 -6 4013.44 1200.61 2
 -2 -9 6 3503 601.494 9
 2 -9 -6 3417.25 538.492 9
 -2 9 -6 3037.84 525.953 4
 2 -9 -6 2836.45 595.715 7
 -2 9 -7 12305.7 2082.81 2
 -2 -9 7 11649.8 1106.51 9
 2 -9 -7 12190.7 1011.44 9
 -2 9 -7 11482.1 1017.92 4
 2 -9 -7 12443.6 1144.91 7
 -2 -9 8 7105.03 889.147 9
 2 -9 -8 6716.71 754.364 9
 -2 9 -8 7325.32 821.319 4
 2 -9 -8 7913.03 918.096 7
 -2 -9 9 24573.6 1638.48 9
 2 -9 -9 23540.6 1597.8 7
 2 -9 -9 22659.4 1436.88 9
 -2 -9 10 7659.47 906.688 9
 2 -9 -10 9080.16 845.721 9
 2 -9 -10 8228.99 936.219 7
 -2 -9 11 5556.09 773.927 9
 2 -9 -11 6065.99 691.045 9
 2 -9 -11 4908.12 717.582 7
 2 -9 -12 11806.7 936.078 9
 2 -9 -12 11420.1 1046.38 7
 -2 -9 12 11125.1 1040.73 6
 -2 -9 12 10264.7 1014.85 9
 -2 -9 13 27242.7 1581.95 6
 -2 -9 13 28430.4 1644.57 9
 2 -9 -13 26698.3 1446.71 9
 2 -9 -13 27307.1 1589.78 7
 2 -9 -14 9844.81 789.68 9
 -2 -9 14 8923.76 789.649 6
 -2 9 -14 9962.62 750.529 3
 2 -9 -14 10521 874.759 7
 -2 -9 15 207.966 217.688 6
 2 -9 -15 660.279 229.83 9
 -2 9 -15 683.095 228.156 3
 2 -9 -15 812.148 276.201 7
 2 -9 -16 1048.69 233.933 9
 2 -9 -16 864.679 226.13 7
 -2 -10 -15 7897.11 571.576 9
 -2 10 15 6334.23 490.321 4
 2 10 -15 7180.13 557.69 7
 -2 10 14 3419.43 418.421 4
 2 10 -14 3268.76 456.052 7
 -2 -10 -14 3915.46 466.782 9
 -2 -10 -13 9829.93 805.503 9
 2 10 -13 8509.67 783.248 7
 -2 10 13 8253.35 707.766 4
 -2 10 12 4314.08 558.29 4
 -2 -10 -12 4479.7 608.149 9
 -2 10 11 9332.17 846.179 4
 -2 -10 -11 8958.81 874.188 9
 -2 -10 -10 11311.1 1033.27 9
 -2 10 10 10010.2 907.163 4
 -2 10 9 742.798 251.962 4
 -2 -10 -9 496.878 395.054 9
 -2 -10 -8 6257.93 819.176 9
 -2 10 8 6441.92 749.536 4
 -2 10 7 1721.62 454.388 4
 -2 -10 -7 1452.81 516.618 9
 2 -10 7 2147.63 475.773 8
 -2 -10 -7 2980.74 529.402 8
 -2 -10 -6 24205.2 1617.91 9
 2 -10 6 24790.6 1559.27 8
 -2 10 6 21983.9 1466.35 4
 -2 -10 -6 26186.9 1551.54 8
 -2 -10 -5 8063.33 839.461 8
 -2 10 5 9080.96 881.369 4
 2 -10 5 9054.6 918.007 8
 -2 -10 -5 9031.86 966.266 9
 2 -10 4 25071.4 1590.74 8
 -2 -10 -4 24786.4 1538.76 8
 -2 10 4 24773.3 1535.2 4
 -2 -10 -4 24218.9 1613.52 9
 -2 -10 -3 7380.97 888.019 9
 2 -10 3 9636.27 961.753 8
 -2 -10 -3 7727.4 841.406 8
 -2 10 3 8098.12 828.1 4
 2 -10 3 11500.7 2093.66 1
 -2 -10 -2 34993.8 1989.86 9
 -2 -10 -2 33305 1847.06 8
 2 -10 2 31974.7 1863.82 8
 2 -10 2 36287.4 3904.39 1
 -2 10 2 35128.5 1849.07 4
 -2 10 1 17035.8 1219.13 4
 -2 -10 -1 16911.4 1318.51 9
 -2 -10 -1 16908.4 1252.84 8
 2 -10 1 17631.3 1319.87 8
 2 -10 1 15068.4 2415.89 1
 -2 -10 0 121362 4514.48 9
 -2 -10 0 116525 4368.93 8
 2 -10 0 122825 4504.95 8
 -2 10 0 118772 4276.53 4
 2 -10 0 120713 7520.75 1
 -2 -10 1 18642.4 1401.23 9
 -2 -10 1 17844.8 1328.35 8
 2 -10 -1 17050.9 1337.74 8
 -2 10 -1 16520.4 1199.2 4
 -2 -10 2 32238.5 1868.59 8
 -2 10 -2 32761.1 1739.24 4
 -2 10 -2 35837.3 3789.29 2
 -2 -10 2 31515.3 1882.34 9
 -2 10 -3 8411.29 1883.42 2
 -2 -10 3 8134.91 900.922 8
 -2 10 -3 9108.83 863.121 4
 -2 -10 3 7810.59 889.061 9
 -2 -10 4 26512.3 1678.26 8
 -2 10 -4 21546.8 3045.06 2
 2 -10 -4 22283 1594.84 7
 -2 10 -4 22867.6 1425.16 4
 -2 -10 4 24069.3 1604.54 9
 -2 -10 5 10007.8 1019.94 9
 -2 -10 5 9448.98 986.949 8
 2 -10 -5 7581.25 922.464 7
 -2 10 -5 8955.99 852.883 4
 -2 10 -6 23777.9 1452.45 4
 -2 -10 6 24896.2 1630.8 9
 2 -10 -6 20586.1 1563.71 7
 2 -10 -7 1390.26 412.963 9
 2 -10 -7 1783.26 507.616 7
 -2 -10 7 1654.53 483.21 9
 -2 10 -7 1798.92 437.467 4
 -2 10 -8 6396.17 741.201 4
 2 -10 -8 6094.23 834.837 7
 -2 -10 8 5985.54 802.779 9
 2 -10 -8 7335.63 781.417 9
 2 -10 -9 206.027 384.801 7
 2 -10 -9 266.22 282.141 9
 -2 -10 9 552.73 318.072 9
 -2 -10 10 8759.33 919.063 9
 2 -10 -10 10616.4 1023.87 7
 2 -10 -10 9620.38 846.974 9
 -2 -10 11 10241.4 974.631 9
 -2 -10 11 9876.25 954.974 6
 2 -10 -11 8693.43 789.471 9
 2 -10 -11 8141.26 885.371 7
 2 -10 -12 4099.02 530.412 9
 -2 -10 12 3963.78 586.033 9
 2 -10 -12 4101.41 597.957 7
 -2 -10 12 4215 607.818 6
 2 -10 -13 8517.26 680.525 9
 -2 -10 13 7547.13 716.529 6
 2 -10 -13 8351.21 780.299 7
 -2 -10 13 7735.18 751.123 9
 -2 10 -13 8147.01 615.665 3
 -2 -10 14 2619.69 395.334 6
 2 -10 -14 3246.48 389.62 9
 2 -10 -14 2886.04 441.875 7
 2 -10 -15 6821.04 474.022 9
 -2 -10 15 4933.01 429.958 6
 -2 -11 -14 4084.32 398.861 9
 2 11 -14 3025.67 346.794 7
 -2 -11 -13 6431.35 577.12 9
 -2 11 13 5674.24 483.202 4
 2 11 -13 5966.98 574.067 7
 -2 11 12 8406.52 645.698 4
 -2 -11 -12 7659.32 703.541 9
 -2 -11 -11 6173.55 670.769 9
 -2 11 11 5435.88 574.7 4
 -2 -11 -10 6057.85 712.685 9
 -2 11 10 5538.46 607.074 4
 -2 -11 -9 10996.1 988.205 9
 -2 11 9 11450.8 910.657 4
 -2 -11 -8 19190.2 1381.15 9
 -2 11 8 21857.4 1335.45 4
 -2 -11 -7 9342.6 981.92 9
 -2 11 7 8361.69 823.323 4
 -2 -11 -7 8304.52 792.868 8
 2 -11 6 38279.7 1962.08 8
 -2 -11 -6 34415.7 1991.78 9
 -2 -11 -6 38920.7 1922.61 8
 -2 11 6 34165.9 1835.08 4
 -2 -11 -5 8594.13 944.9 9
 2 -11 5 7247.54 846.041 8
 -2 -11 -5 8244.46 851.189 8
 -2 11 5 7936.71 805.645 4
 -2 -11 -4 6112.25 839.782 9
 2 -11 4 5868.63 775.478 8
 -2 -11 -4 7244.11 808.839 8
 -2 11 4 6866.23 770.255 4
 -2 -11 -3 27291.3 1641.15 8
 2 -11 3 25946.4 1640.03 8
 -2 11 3 25061.9 1512.55 4
 -2 -11 -3 25667.6 1692.56 9
 -2 -11 -2 58590.8 2780.8 9
 -2 -11 -2 61499 2722.2 8
 2 -11 2 58888.4 2741.49 8
 -2 11 2 60826.2 2614.49 4
 -2 -11 -1 19290.4 1454.36 9
 -2 -11 -1 19641.5 1389.1 8
 2 -11 1 20635.2 1459.45 8
 -2 11 1 21229.3 1339.22 4
 -2 -11 0 105.198 316.377 8
 2 -11 0 -335.48 393.142 8
 -2 -11 0 89.2173 356.739 9
 -2 11 0 121.724 249.537 4
 -2 -11 1 21001.4 1491.22 9
 -2 -11 1 22110.5 1490.59 8
 2 -11 -1 19739.6 1447.66 8
 -2 11 -1 19506 1284.78 4
 -2 -11 2 60182.4 2803.53 9
 -2 -11 2 62667 2801.86 8
 2 -11 -2 60378.3 2826.95 8
 -2 11 -2 59091.5 2543.37 4
 -2 -11 3 27593.7 1721.62 8
 2 -11 -3 23793.7 1643.84 8
 -2 11 -3 28988.5 1558.01 4
 -2 -11 3 25368.2 1674.21 9
 -2 -11 4 5670.97 787.375 8
 -2 -11 4 5365.62 761.422 9
 -2 11 -4 5900.49 683.034 4
 -2 -11 5 7046.03 870.01 9
 -2 11 -5 7886.86 754.723 4
 -2 -11 6 33241.3 1901.13 9
 -2 -11 7 8934.23 931.088 9
 -2 -11 8 20555.3 1419.96 9
 2 -11 -8 21075.8 1244.77 9
 -2 -11 9 10497.9 998.803 9
 2 -11 -9 10560.5 846.952 9
 2 -11 -9 10538.8 1005.18 7
 -2 -11 10 4683.78 623.607 6
 -2 -11 10 5116.74 655.924 9
 2 -11 -10 4810.3 557.312 9
 2 -11 -10 4702.05 649.979 7
 -2 -11 11 5481.54 662.806 6
 2 -11 -11 5520.73 547.696 9
 -2 -11 11 5065.72 619.119 9
 -2 -11 12 7208.58 691.564 6
 -2 -11 12 9263.09 760.169 9
 2 -11 -12 8167.96 619.534 9
 -2 -11 13 5626.27 547.492 6
 2 -11 -13 6092.37 474.017 9
 2 -11 -14 3554.85 377.093 8
 -2 -11 14 2028.98 288.272 6
 2 12 -12 2532.79 359.005 7
 -2 -12 -12 3389.89 410.766 9
 -2 12 11 703.098 174.232 4
 -2 -12 -11 889.595 273.067 9
 -2 -12 -10 247.944 264.157 9
 -2 12 10 107.248 146.242 4
 -2 -12 -9 149.345 280.864 9
 -2 12 9 254.139 164.413 4
 -2 -12 -8 11769.5 961.368 9
 -2 12 8 8644.42 716.759 4
 -2 -12 -7 1035.82 428.487 9
 -2 -12 -7 1005.25 317.218 8
 -2 12 7 1542.69 328.464 4
 -2 -12 -6 3340.93 602.34 9
 -2 -12 -6 3511.88 521.178 8
 -2 12 6 3226.91 474.086 4
 -2 -12 -5 9920.72 972.564 9
 2 -12 5 9888.52 923.27 8
 -2 -12 -5 9063.39 836.251 8
 -2 12 5 8147.55 747.362 4
 -2 -12 -4 21757 1478.43 9
 2 -12 4 20692.5 1402.77 8
 -2 -12 -4 20307.4 1341.38 8
 -2 12 4 21497.2 1263.33 4
 2 -12 3 2173.44 524.318 8
 -2 -12 -3 1984.86 469.178 8
 -2 -12 -3 1671.44 482.932 9
 -2 12 3 2903.81 439.14 4
 -2 -12 -2 1268.48 490.225 9
 -2 -12 -2 1250.38 399.042 8
 2 -12 2 1248.26 393.595 8
 -2 12 2 687 282.093 4
 -2 -12 -1 244.184 303.767 8
 2 -12 1 71.4197 333.03 8
 -2 -12 -1 412.321 377.802 9
 -2 -12 0 5375.35 723.85 8
 2 -12 0 6229.95 786.162 8
 -2 -12 0 4140.26 674.274 9
 -2 -12 1 247.719 334.636 8
 2 -12 -1 -49.7188 331.404 8
 -2 -12 1 621.436 379.175 9
 -2 -12 2 328.575 372.053 8
 2 -12 -2 309.508 293.929 8
 -2 -12 2 1606.52 464.185 9
 -2 -12 3 1697.36 504.448 8
 2 -12 -3 2016.6 530.144 8
 -2 -12 3 1798.01 480.574 9
 2 -12 -4 21597.4 1455.31 8
 -2 -12 4 21441.5 1444.67 9
 -2 -12 5 7109.61 820.558 9
 2 -12 -5 8488.73 886.31 8
 2 -12 -6 3074.34 596.403 8
 -2 -12 6 3376.13 579.848 9
 -2 -12 7 750.233 366.357 9
 2 -12 -7 955.205 413.639 8
 -2 -12 8 8984.01 885.587 6
 -2 -12 8 8909.81 864.191 9
 2 -12 -8 11589.4 966.075 8
 -2 -12 9 126.8 279.724 6
 -2 -12 9 -139.613 207.443 9
 2 -12 -9 -276.008 321.041 8
 -2 -12 10 301.466 229.208 6
 -2 -12 10 -57.648 231.719 9
 2 -12 -10 129.4 248.801 8
 -2 -12 11 538.579 236.684 6
 -2 -12 11 993.622 285.095 9
 2 -12 -11 947.515 298.973 8
 -2 -12 12 2372.14 348.009 6
 2 -12 -12 3127.29 373.096 8
 -2 -13 -11 5452.11 417.435 9
 2 13 -11 3842.8 356.625 7
 -2 -13 -10 654.289 217.274 9
 -2 -13 -9 4378.41 495.17 9
 -2 -13 -8 9207.78 755.354 9
 -2 -13 -7 9331.37 786.194 9
 -2 -13 -6 1509.41 326.477 8
 -2 -13 -6 2227.61 456.146 9
 -2 -13 -5 4364.14 608.332 9
 -2 -13 -5 4840.78 536.313 8
 2 -13 4 18297.4 1196.87 8
 -2 -13 -4 19333.7 1181.1 8
 -2 -13 -4 21049.7 1307.11 9
 -2 -13 -3 9406.61 870.067 9
 -2 -13 -3 8450 783.998 8
 2 -13 3 8367.87 812.42 8
 -2 -13 -2 3181.19 568.158 9
 2 -13 2 4574.55 638.7 8
 -2 -13 -2 2655.64 518.622 8
 -2 -13 -1 13681 1076.58 9
 2 -13 1 13176.4 1040.67 8
 -2 -13 -1 11224.5 956.895 8
 -2 -13 0 4087.3 623.418 9
 -2 -13 0 3774.42 586.191 8
 2 -13 0 4287.55 630.303 8
 -2 -13 1 13118.1 1045.7 9
 -2 -13 1 13512.5 1061.42 8
 2 -13 -1 13586.5 1065.19 8
 -2 -13 2 3304.42 565.746 8
 2 -13 -2 3632.51 566.41 8
 -2 -13 2 3283.76 532.494 9
 -2 -13 3 8167.45 719.794 6
 -2 -13 3 9116.24 854.435 9
 2 -13 -3 9533.34 874.543 8
 -2 -13 4 17785.8 1131.16 6
 -2 -13 4 18902.6 1241.81 9
 2 -13 -4 21236.5 1301.4 8
 -2 -13 5 3788.74 519.793 6
 -2 -13 5 5424.76 637.889 9
 2 -13 -5 4870.5 638.387 8
 -2 -13 6 1308.16 363.886 6
 -2 -13 6 1507.81 371.464 9
 2 -13 -6 1947.19 432.954 8
 -2 -13 7 6193.77 671.158 6
 2 -13 -7 8522.72 742.228 8
 -2 -13 7 7813.31 689.803 9
 -2 -13 8 8622.42 718.508 6
 2 -13 -8 9454.17 754.584 8
 -2 -13 8 7916.26 668.311 9
 -2 -13 9 4617.47 491.754 9
 -2 -13 9 4068.36 474.551 6
 2 -13 -9 5042.38 515.245 8
 -2 -13 10 186.351 170.449 6
 2 -13 -10 299.35 181.766 8
 -2 -14 -8 31.1886 127.199 9
 -2 -14 -7 4344.48 435.913 9
 -2 -14 -6 41.1854 187.572 9
 -2 -14 -5 3963.24 472.966 9
 -2 -14 -4 -58.3037 234.974 9
 -2 -14 -4 345.056 172.632 8
 -2 -14 -3 2520.11 424.498 9
 -2 -14 -3 3078.93 404.796 8
 2 -14 3 3064.45 444.487 8
 -2 -14 -2 1817.78 343.676 8
 2 -14 2 1181.93 316.794 8
 -2 -14 -2 1959.34 381.759 9
 -2 -14 -1 711.281 273.913 8
 2 -14 1 1105.52 306.875 8
 -2 -14 -1 497.017 271.521 9
 -2 -14 0 2201.24 410.094 9
 2 -14 0 2782.68 432.922 8
 2 -14 -1 611.423 319.736 8
 -2 -14 1 844.947 305.729 9
 2 -14 -2 1947.89 384.818 8
 -2 -14 2 1452.82 333.06 9
 2 -14 -3 2422.52 420.124 8
 -2 -14 3 2590.41 411.016 9
 2 -14 -4 47.7934 217.239 8
 -2 -14 4 166.668 178.583 9
 -2 -14 5 2142.32 317.91 6
 -2 -14 5 3405.35 403.679 9
 2 -14 -5 2964.97 407.737 8
 -2 -14 6 -201.201 164.867 6
 2 -14 -6 -46.9517 213.413 8
 -2 -14 6 -85.1717 144.485 9
 2 -14 -7 4774.08 443.119 8
 -2 -14 7 3662.28 385.339 6
 2 -14 -8 327.098 154.439 8
 -2 -15 -2 16505.6 817.278 9
 -2 -15 -1 3224.15 350.52 9
 -2 -15 0 2264.86 299.419 9
 2 -15 0 2037.64 301.867 8
 2 -15 -1 3043.86 348.856 8
 2 -15 -2 20340.5 942.845 8
 2 -15 -3 5277.15 426.364 8
 -3 0 0 755.121 353.403 2
 -3 0 1 129038 4675.43 2
 -3 0 -1 139975 5107.4 2
 -3 0 2 132406 4461.58 2
 -3 0 -2 123507 5080.89 2
 -3 0 -3 11942.7 1290.46 2
 -3 0 3 8138.34 690.06 2
 -3 0 -4 226869 8213.17 2
 -3 0 -5 5103.94 970.759 2
 -3 0 -6 9215.07 1400.63 2
 -3 0 -7 24203.2 2315.88 2
 -3 0 -8 44631.8 3384.44 2
 -3 0 -9 360.169 604.6 2
 -3 0 -10 2742.85 936.447 2
 3 0 -10 1252.6 372.965 7
 -3 0 -11 32747.5 3230.24 2
 -3 0 -11 35519.8 1878.21 10
 3 0 -11 34848.6 1878.77 7
 -3 0 -11 34606.9 1912.55 11
 -3 0 -12 21232.3 1441.95 3
 3 0 -12 21063.5 1452.85 7
 -3 0 -12 22070.6 1516.3 10
 -3 0 -12 21187.1 2619.3 2
 -3 0 -12 23333.9 1516.52 11
 -3 0 -13 866.594 420.1 10
 -3 0 -13 982.993 425.678 3
 3 0 -13 270.91 317.817 7
 -3 0 -13 217.954 616.671 2
 -3 0 -13 341.139 266.771 11
 -3 0 -14 8219.74 932.658 10
 -3 0 -14 7404.11 863.64 3
 3 0 -14 8456.16 906.004 7
 3 0 -14 8799.33 919.444 10
 -3 0 -15 4415.6 697.914 3
 3 0 -15 4486.97 676.056 10
 3 0 -15 3273.13 615.764 7
 -3 0 -15 3829.08 647.341 10
 -3 0 -16 285.094 316.204 10
 3 0 -16 -74.5141 288.582 10
 -3 0 -16 -204.024 366.032 3
 3 0 -16 -132.348 338.739 7
 3 0 -17 1130.45 352.818 10
 -3 0 17 799.928 271.477 4
 3 0 -17 472.963 297.449 7
 -3 0 -17 859.056 375.955 3
 -3 0 -17 720.614 391.723 10
 -3 0 -18 698.419 324.072 3
 3 0 -18 425.298 285.525 7
 3 0 -18 622.146 305.668 10
 -3 0 -18 1083.6 351.396 10
 -3 0 -19 3448.05 459.134 3
 3 0 -19 3999.26 483.756 7
 -3 0 -19 3308.14 457.232 10
 3 0 -19 3757.89 472.993 10
 3 0 -20 546.291 196.732 10
 3 0 -20 5.22568 120.656 7
 -3 0 -20 -6.45229 130.007 10
 -3 -1 -20 4002.19 408.4 10
 3 1 -20 3497.71 369.812 7
 3 1 -20 4088.39 405.904 10
 3 1 -19 1442.15 331.252 7
 -3 1 19 1533.54 251.143 4
 -3 -1 -19 1488.38 347.569 10
 3 1 -19 1569.51 342.845 10
 -3 1 18 2163.87 342.15 4
 -3 -1 -18 2440.81 463.572 3
 3 1 -18 3437.73 506.345 10
 -3 -1 -18 2487.7 480.526 10
 3 1 -18 2764.64 465.611 7
 3 1 -17 5864.29 682.646 10
 3 1 -17 3471.93 564.077 7
 -3 -1 -17 3732.77 588.848 3
 -3 1 17 3892.81 535.806 4
 -3 -1 -17 3702.25 635.78 10
 -3 -1 -16 1129.5 462.006 10
 -3 -1 -16 834.953 401.492 3
 -3 1 16 1079.66 327.758 4
 3 1 -16 1253.33 472.876 7
 3 1 -16 1483.51 476.938 10
 -3 -1 -15 3901.33 622.721 3
 3 1 -15 3585.98 669.943 10
 -3 -1 -15 4054.44 727.322 10
 3 1 -15 3368.7 657.552 7
 3 1 -14 11092 1060.79 7
 -3 -1 -14 12326.2 1150.91 10
 -3 -1 -14 11600.6 1048.24 3
 3 1 -14 11672.5 1054.42 10
 -3 -1 -13 29206.7 1723.45 3
 3 1 -13 29925.8 1804.92 7
 -3 -1 -13 33776.2 1944.4 10
 -3 -1 -13 31181.6 1788.19 11
 -3 -1 -13 27854.7 3104.06 2
 -3 -1 -12 31361.4 1727.87 3
 3 1 -12 28209.8 1728.92 7
 -3 -1 -12 31877 1806.66 11
 -3 -1 -12 33146.2 3294.24 2
 -3 -1 -12 32589.4 1872.1 10
 -3 -1 -11 18367.7 1225.97 3
 3 1 -11 18264.7 1320.72 7
 -3 -1 -11 19287.4 1341.3 11
 -3 -1 -11 15864.9 2196.43 2
 -3 -1 -11 18474.4 1312.36 10
 3 1 -10 16514.4 1166.55 7
 -3 -1 -10 14781.6 1104.8 10
 -3 -1 -10 13909.4 1924.83 2
 -3 -1 -9 278.773 512.984 2
 -3 -1 -8 63022.4 4107.83 2
 -3 -1 -7 24303.1 2330.93 2
 -3 -1 -6 22670.1 2158.11 2
 -3 -1 -5 16211.1 1704 2
 -3 1 4 121189 4181.25 2
 -3 -1 -4 107751 4943.88 2
 -3 1 3 63127.5 2679.61 2
 -3 -1 -3 52211.1 3019.41 2
 -3 -1 -2 100032 4171.84 2
 -3 1 2 92396.4 3716.57 2
 -3 1 1 53828.2 2614.93 2
 -3 -1 -1 55423.4 2742.43 2
 -3 1 0 233142 7665.99 2
 -3 -1 0 225791 7369.36 2
 -3 1 -1 55118.6 2836.1 2
 -3 -1 1 51746.6 2316.09 2
 -3 1 -2 89872.6 4124.42 2
 -3 -1 2 93539.2 3222.81 2
 -3 1 -3 60248.9 3282.85 2
 -3 1 -4 110586 4998.39 2
 -3 1 -5 17717.8 1861.02 2
 -3 1 -6 20336.6 2053.39 2
 -3 1 -7 24804 2403.27 2
 -3 1 -8 76624.3 4646.38 2
 -3 1 -9 493.49 624.16 2
 3 -1 -10 16987.1 1184.76 7
 -3 1 -10 15905 2156.54 2
 -3 -1 10 16778.6 1264.22 9
 -3 1 -11 17185.3 2344.42 2
 3 -1 -11 18852.5 1303.35 7
 -3 1 -11 17492.7 1293.55 11
 -3 1 -11 16597.9 1231.38 10
 -3 1 -12 27909.6 3074.82 2
 3 -1 -12 31733.6 1784.67 7
 -3 1 -12 32751.5 1865.49 11
 -3 1 -12 25560.8 1663.19 10
 -3 1 -13 29124.6 1752.62 11
 -3 1 -13 27145.4 1745.82 10
 -3 1 -13 28817.4 1774.1 3
 3 -1 -13 30742 1797.97 7
 3 -1 -13 31468.9 1808.45 10
 -3 1 -13 26613 3068.75 2
 -3 1 -14 13433.1 1164.91 3
 3 -1 -14 11756.1 1072.05 7
 -3 1 -14 12831.7 1140.74 10
 3 -1 -14 11784.3 1060.48 10
 3 -1 -15 3456.7 602.588 10
 -3 1 -15 3556.33 637.49 3
 3 -1 -15 3344.73 633.596 7
 -3 1 -15 3371.1 619.494 10
 -3 1 -16 1194.46 478.226 3
 -3 1 -16 1188.55 421.447 10
 3 -1 -16 1400.3 411.737 10
 3 -1 -16 1081.16 401.84 7
 -3 1 -17 3871.93 607.452 3
 3 -1 -17 4775.9 630.953 7
 -3 1 -17 3680.78 593.351 10
 3 -1 -17 4229.47 571.502 10
 -3 1 -18 2890.66 463.067 10
 3 -1 -18 2909.66 487.468 7
 -3 1 -18 2988.43 499.557 3
 3 -1 -18 2537.82 447.365 10
 -3 1 -19 1083.37 269.139 10
 3 -1 -19 1391.61 303.754 10
 3 -1 -19 1454.92 322.504 7
 -3 1 -19 1421.23 347.554 3
 3 -1 -20 3948.48 385.894 7
 3 -1 -20 3316.21 345.515 10
 3 2 -20 1166.96 232.131 10
 3 2 -20 1444.95 238.075 7
 -3 -2 -20 705.067 220.667 10
 -3 -2 -19 1231.07 328.2 10
 -3 2 19 996.249 238.31 4
 3 2 -19 880.042 285.611 10
 3 2 -19 1312.4 303.556 7
 3 2 -18 5702.96 634.736 7
 -3 2 18 3644.93 473.082 4
 -3 -2 -18 4640.99 632.246 10
 3 2 -18 4839.48 573.133 10
 -3 -2 -17 18597.4 1211.11 3
 3 2 -17 17569.6 1249.32 7
 3 2 -17 20696.3 1287.08 10
 -3 2 17 18914 1223.76 4
 -3 -2 -17 19326.9 1351.67 10
 -3 -2 -16 10288.1 959.939 3
 3 2 -16 12631.7 1085.02 7
 -3 -2 -16 11506.1 1090.21 10
 -3 2 16 14003.4 1080.88 4
 3 2 -16 13466 1098.99 10
 -3 2 15 405.031 297.337 4
 3 2 -15 105.919 350.309 10
 -3 -2 -15 -35.9628 312.981 3
 3 2 -15 640.356 370.541 7
 -3 -2 -15 488.721 420.27 10
 -3 -2 -14 21081.2 1404.15 3
 -3 -2 -14 21504.1 1532.61 10
 3 2 -14 21400.5 1524.64 7
 -3 -2 -13 20453.3 2637.44 2
 3 2 -13 19183.5 1428.04 7
 -3 -2 -13 19877.6 1346.94 3
 -3 -2 -13 20634.7 1375.22 11
 -3 -2 -13 20360.3 1482.75 10
 -3 -2 -12 34133.4 1789.43 3
 3 2 -12 34815.6 1942.7 7
 -3 -2 -12 30857.9 1802.98 11
 -3 -2 -12 26675.9 3051.14 2
 -3 -2 -12 34231.7 1921.78 10
 -3 -2 -11 2155.99 856 2
 -3 -2 -11 2366.68 450.046 3
 3 2 -11 2748.76 542.629 7
 -3 -2 -11 2182.28 469.572 11
 -3 -2 -11 2429.69 528.627 10
 3 2 -10 21693.2 1402.96 7
 -3 -2 -10 19140.5 2323.76 2
 -3 -2 -10 20266 1339.8 10
 -3 -2 -9 97665.1 5454.25 2
 -3 -2 -8 135591 6485.25 2
 -3 -2 -7 3278.06 929.129 2
 -3 -2 -6 21728.1 2116.18 2
 -3 -2 -5 27529.1 2258.75 2
 -3 -2 -4 49021 2958.96 2
 -3 2 3 49331 2635.43 2
 -3 -2 -3 49397.8 2858.39 2
 -3 -2 -2 28973.6 1948.15 2
 -3 2 2 27534.4 1900.98 2
 -3 2 1 14398.2 1377.12 2
 -3 -2 -1 17636.1 1406.28 2
 -3 2 0 188682 6788.97 2
 -3 -2 0 184807 6229.88 2
 -3 -2 1 13257.9 993.776 2
 -3 2 -1 15262 1471.33 2
 -3 -2 2 31496.1 1394.88 2
 -3 2 -2 26241.9 2072.91 2
 -3 2 -3 49420.4 2992.79 2
 3 -2 -3 45328 1889.59 1
 -3 2 -4 54441.4 3341.9 2
 -3 2 -5 30801.3 2529.61 2
 -3 2 -6 22585.7 2221.28 2
 -3 2 -7 3288.7 958.33 2
 -3 2 -8 131389 6570.45 2
 -3 2 -9 99018.2 5708.78 2
 -3 -2 10 20314.2 1433.7 9
 -3 2 -10 22517.4 1283.3 5
 3 -2 -10 19932 1329.42 7
 -3 2 -10 21817.2 2542.32 2
 -3 2 -11 2111.73 1098.55 2
 -3 2 -11 1407.59 325.277 10
 -3 -2 11 1990.51 501.716 9
 3 -2 -11 1910.5 450.217 7
 -3 -2 11 2177.84 469.181 6
 3 -2 -12 35626.7 1883.67 7
 -3 2 -12 32874.4 1925.6 11
 -3 2 -12 28882.9 3231.95 2
 -3 2 -12 31368.8 1750.16 10
 3 -2 -12 26343.4 1662.48 10
 -3 2 -13 19493.1 1422.73 11
 3 -2 -13 21164.4 1437.22 7
 -3 2 -13 16493.1 1277.22 10
 3 -2 -13 20911.3 1409.94 10
 -3 2 -13 22668.8 2774.74 2
 -3 2 -14 24560 1623.57 3
 3 -2 -14 24443.4 1539.16 10
 3 -2 -14 24665.6 1592.28 7
 -3 2 -14 22956.3 1522.46 10
 3 -2 -15 370.868 346.573 10
 3 -2 -15 579.507 313.269 7
 -3 2 -15 579.495 445.446 3
 -3 2 -15 237.561 276.475 10
 -3 2 -16 11853.4 1002.55 10
 3 -2 -16 13616.5 1091.88 7
 3 -2 -16 13280.7 1056.07 10
 -3 2 -16 12095.4 1086.48 3
 -3 2 -17 17026.2 1219.36 3
 3 -2 -17 20998.1 1320.9 7
 -3 2 -17 16716.3 1144.41 10
 3 -2 -17 20580.3 1246.24 10
 3 -2 -18 4070.66 542.326 7
 -3 2 -18 4187.32 507.585 10
 3 -2 -18 4226.47 526.371 10
 -3 2 -18 5247.07 604.976 3
 3 -2 -19 1429.96 282.835 10
 -3 2 -19 1108.52 299.92 3
 -3 2 -19 623.833 200.52 10
 3 -2 -19 1352.73 313.978 7
 -3 2 -20 1034.76 228.284 3
 3 -2 -20 832.852 192.044 7
 -3 -3 -20 719.778 193.098 10
 3 3 -19 3611.12 424.255 7
 -3 3 19 3611.14 407.436 4
 -3 -3 -19 3748.02 477.002 10
 3 3 -19 4263.71 438.724 10
 -3 3 18 2789.62 418.923 4
 -3 -3 -18 2254.01 468.652 10
 3 3 -18 2722.44 462.102 7
 3 3 -18 3146.19 459.987 10
 3 3 -17 23663.6 1427.54 7
 -3 -3 -17 24314.9 1500.7 10
 -3 3 17 21702.9 1334.52 4
 3 3 -17 24016.5 1368.27 10
 3 3 -16 2620.14 511.647 10
 -3 3 16 2079 446.562 4
 -3 -3 -16 1960.94 469.174 3
 3 3 -16 2057.21 477.946 7
 -3 -3 -16 2145.3 536.672 10
 -3 -3 -15 848.378 410.401 10
 3 3 -15 1671.68 450.798 10
 -3 3 15 1842.57 468.646 4
 -3 -3 -15 1160.28 379.448 3
 3 3 -15 1780.57 483.28 7
 -3 3 14 11967.9 1088.95 4
 -3 -3 -14 13122.6 1053.11 3
 3 3 -14 11644.6 1116.05 7
 -3 -3 -14 12464.5 1143.86 10
 -3 -3 -13 28253.9 1605.1 3
 -3 -3 -13 30200.1 1693.99 11
 3 3 -13 29545.3 1826.47 7
 -3 3 13 26179.9 1728.79 4
 -3 -3 -13 27357.3 1751.32 10
 -3 -3 -12 68.8402 363.27 10
 -3 3 12 10.0255 311.789 4
 -3 -3 -12 -370.74 316.402 3
 -3 -3 -12 -1376.82 741.877 2
 -3 -3 -12 679.62 293.419 11
 3 3 -12 212.663 336.94 7
 -3 -3 -11 1262.6 360.382 3
 -3 -3 -11 668.966 389.561 10
 -3 -3 -11 -224.555 394.043 2
 3 3 -11 3.38704 266.086 7
 -3 -3 -11 22.066 212.73 11
 3 3 -10 25391.9 1628.06 7
 -3 -3 -10 26916 1589.81 11
 -3 -3 -10 25067.9 1545.63 10
 -3 -3 -10 22965.9 2584.76 2
 -3 -3 -9 15679.5 2049.9 2
 -3 -3 -8 6479.72 1265.83 2
 -3 -3 -7 20813.1 2156.28 2
 -3 -3 -6 40543.3 2996.98 2
 -3 -3 -5 21607.7 2024.53 2
 -3 -3 -4 6244.79 1048.21 2
 -3 -3 -3 60340.9 3267.06 2
 -3 -3 -2 49428.5 2755.38 2
 -3 3 1 87446.4 4229.8 2
 -3 -3 -1 85077.6 3731.1 2
 -3 3 0 79609.5 3980.99 2
 -3 -3 0 76697.6 3314.42 2
 -3 3 -1 79716.7 4148.83 2
 -3 -3 1 87043 3348.47 2
 -3 3 -2 43236.4 2880.81 2
 3 -3 -2 44012.7 2272.8 1
 -3 3 -3 65192.9 3734.87 2
 3 -3 -3 61770.1 2695.57 1
 -3 3 -4 8456.92 1352.88 2
 -3 3 -5 24547.4 2349.57 2
 -3 3 -6 49824.2 3549.99 2
 -3 3 -7 21274.9 2329.5 2
 -3 3 -8 6801.35 1406.21 2
 -3 3 -9 17603.8 2331.2 2
 -3 3 -10 26505 2910.6 2
 -3 3 -10 26990.4 1482.66 5
 -3 -3 10 30254.5 1672.71 6
 3 -3 -10 25301.9 1536.03 7
 -3 -3 10 27069.5 1694.12 9
 -3 3 -11 442.83 580.346 2
 -3 -3 11 442.57 228.852 6
 -3 -3 11 66.2986 336.215 9
 3 -3 -11 458.37 286.342 7
 3 -3 -11 307.417 274.019 10
 3 -3 -12 -145.274 271.747 10
 -3 -3 12 -133.747 174.001 6
 -3 -3 12 245.575 384.671 9
 3 -3 -12 300.246 355.626 7
 -3 3 -12 -248.511 645.826 2
 3 -3 -13 28485.5 1688.47 7
 -3 3 -13 26684.2 1737.17 11
 3 -3 -13 24740.7 1516.57 10
 -3 3 -14 10625.8 1068.11 3
 3 -3 -14 12054.2 1077.84 7
 -3 3 -14 12637.3 1010.19 10
 -3 3 -14 12698.1 1094.89 11
 3 -3 -14 9188.09 886.781 10
 -3 3 -15 1359.93 391.396 10
 3 -3 -15 1592.96 434.228 10
 3 -3 -15 1312.59 385.985 7
 -3 3 -15 1160.92 502.997 3
 3 -3 -16 3324.81 510.806 10
 3 -3 -16 2225.93 513.948 7
 -3 3 -16 2709.95 562.787 3
 -3 3 -16 2379.57 427.871 10
 -3 3 -17 23375.1 1405.22 3
 3 -3 -17 22954.5 1371.11 7
 3 -3 -17 21712.5 1267.47 10
 -3 3 -18 2305.07 442.671 3
 3 -3 -18 2933.93 458.742 7
 3 -3 -18 2086.89 362.538 10
 -3 3 -19 3101.04 423.683 3
 3 -3 -19 3947.56 441.643 7
 3 -3 -19 3881.57 408.473 10
 -3 3 -20 -118.222 143.483 3
 3 4 -19 1970.25 293.096 10
 -3 4 19 1711.58 291.602 4
 3 4 -19 1410.79 265.941 7
 -3 -4 -19 1716.96 307.164 10
 -3 4 18 21163.1 1161.89 4
 3 4 -18 20984.3 1182.06 7
 -3 -4 -18 18574.9 1166.56 10
 3 4 -18 21830.5 1123.73 10
 3 4 -17 1694.05 372.423 10
 -3 4 17 2004.51 414.879 4
 3 4 -17 1548.04 404.79 7
 -3 -4 -17 2578.01 491.352 10
 3 4 -16 5929.64 753.04 7
 -3 4 16 6696.36 748.612 4
 -3 -4 -16 6817.07 812.699 10
 3 4 -16 6345.94 713.909 10
 3 4 -15 1492.43 441.109 10
 -3 -4 -15 1839.42 506.401 10
 -3 4 15 1297.68 419.615 4
 3 4 -15 956.423 430.375 7
 -3 4 14 14924.2 1241.51 4
 3 4 -14 17801.6 1397.76 7
 -3 -4 -14 18324.1 1223.34 3
 -3 -4 -14 16303.6 1311.63 10
 -3 -4 -13 214.685 368.107 10
 -3 4 13 204.864 322.745 4
 -3 -4 -13 -84.371 203.892 9
 -3 -4 -13 -511.913 280.788 3
 3 4 -13 288.292 386.788 7
 -3 -4 -13 138.282 250.472 11
 -3 4 12 -151.895 284.748 4
 -3 -4 -12 -22.7443 280.152 11
 -3 -4 -12 278.938 268.578 9
 -3 -4 -12 462.182 294.08 3
 3 4 -12 514.955 360.208 7
 -3 -4 -12 527.782 578.293 2
 -3 -4 -12 -258.287 266.245 10
 -3 -4 -11 21396.1 1439.29 11
 3 4 -11 21936.7 1550.87 7
 -3 -4 -11 20143.6 2643.89 2
 -3 -4 -11 20720 1439.21 10
 -3 4 11 20423.6 1464.84 4
 -3 -4 -10 39744.9 2073.72 11
 -3 -4 -10 40254.4 3562.53 2
 -3 4 10 43785.8 2172.99 4
 -3 -4 -10 41133.2 2108.03 10
 -3 4 9 6906.16 765.316 4
 -3 -4 -9 6965.17 1385.72 2
 -3 -4 -9 8304.45 865.233 11
 -3 -4 -9 7527.49 800.104 10
 -3 -4 -8 24521.4 2564.65 2
 -3 -4 -7 33946 2912.84 2
 -3 -4 -6 56269.5 3699.62 2
 -3 -4 -5 24316.8 2234.25 2
 -3 -4 -4 46454.7 3028.35 2
 -3 -4 -3 168324 6630.09 2
 -3 -4 -2 240571 8436.97 2
 -3 -4 -1 200080 7125.93 2
 -3 4 0 76343.8 4250.72 2
 -3 -4 0 79844.6 3541.65 2
 3 -4 -1 204678 7336.85 1
 -3 4 -1 204202 8112.14 2
 3 -4 -2 232880 8036.67 1
 -3 4 -2 239712 9166.93 2
 3 -4 -3 153787 5823.93 1
 -3 4 -3 177551 7271.55 2
 -3 4 -4 46853.8 3420.91 2
 -3 4 -5 25179.4 2509.01 2
 -3 4 -6 56734.7 4021.24 2
 -3 4 -7 31505.8 2998.77 2
 -3 4 -8 25757.1 2720.95 2
 -3 4 -9 5758.18 1407.7 2
 -3 -4 9 5637.12 747.318 9
 -3 4 -9 7216.63 715.243 5
 -3 -4 9 6666.98 761.867 6
 -3 4 -9 6174.31 777.194 4
 3 -4 -9 8428.51 815.936 7
 -3 4 -9 7357.42 714.617 12
 -3 4 -10 38043.9 3646.24 2
 -3 -4 10 41294.7 2133.48 6
 -3 -4 10 40531.6 2173.76 9
 3 -4 -10 39847.2 2037.39 7
 -3 4 -10 40771.9 1925.75 5
 -3 -4 11 22830.8 1533.64 6
 3 -4 -11 21725.3 1468.88 7
 -3 -4 11 24323 1646 9
 -3 4 -11 21571.6 2750.3 2
 3 -4 -12 -26.2168 230.584 10
 -3 -4 12 226.9 311.582 6
 -3 -4 12 479.54 406.727 9
 -3 4 -12 -896.978 904.344 2
 3 -4 -12 36.6855 331.285 7
 -3 -4 13 -395.175 393.267 9
 3 -4 -13 853.569 272.239 10
 -3 -4 13 -394.983 296.749 6
 3 -4 -13 -13.5273 295.902 7
 -3 -4 14 16576 1226.01 6
 3 -4 -14 20605 1247.54 10
 3 -4 -14 17734.6 1336.12 7
 -3 4 -14 18997.9 1355.63 11
 3 -4 -15 1668.72 335.093 10
 -3 4 -15 1210.75 446.549 3
 3 -4 -15 1840.94 473.154 7
 -3 4 -16 6929.33 801.087 3
 3 -4 -16 6478.39 741.566 7
 3 -4 -16 4933.39 574.381 10
 3 -4 -17 1923.46 354.095 10
 -3 4 -17 1617.47 409.69 3
 3 -4 -17 1788.43 389.451 7
 -3 4 -18 21045.1 1155.49 3
 3 -4 -18 23124.1 1201.16 7
 3 -4 -18 18177.6 969.183 10
 -3 4 -19 1490.88 276.843 3
 3 -4 -19 1884.5 305.629 7
 -3 5 19 165.255 132.461 4
 3 5 -19 -368.981 148.711 7
 -3 -5 -19 -29.0964 127.591 10
 3 5 -18 53.4838 159.747 10
 3 5 -18 172.035 185.921 7
 -3 5 18 685.343 230.791 4
 -3 -5 -18 671.725 283.351 10
 3 5 -17 3836.11 533.244 7
 -3 -5 -17 3511.09 529.861 10
 -3 5 17 3043.84 476.381 4
 3 5 -17 3304.72 439.606 10
 -3 -5 -16 85.1311 270.531 10
 -3 5 16 491.424 285.378 4
 3 5 -16 353.9 257.321 10
 3 5 -16 216.566 306.14 7
 -3 -5 -15 -300.408 311.351 10
 -3 -5 -15 23.9375 222.138 9
 -3 5 15 18.2264 208.816 4
 3 5 -15 363.641 363.883 7
 3 5 -15 460.51 284.726 10
 3 5 -14 13462.2 1115.6 10
 -3 5 14 15130.3 1212.45 4
 -3 -5 -14 15413 1100.03 9
 3 5 -14 14842.4 1255.83 7
 -3 -5 -14 14915.1 1229.48 10
 -3 5 13 3388.37 609.427 4
 -3 -5 -13 4534.8 577.271 9
 3 5 -13 4573.04 746.928 7
 -3 -5 -13 4723.61 668.482 11
 -3 -5 -13 5523.03 784.23 10
 -3 -5 -12 22638.7 1399.38 9
 -3 -5 -12 23128.7 1569.66 10
 3 5 -12 21717.3 1606.75 7
 -3 5 12 22840.9 1563.81 4
 -3 -5 -12 22044.2 1483.04 11
 -3 -5 -11 8241.64 825.05 9
 -3 -5 -11 7958.14 869.572 11
 -3 -5 -11 6512.78 1644.45 2
 -3 -5 -11 8213.91 917.663 10
 -3 5 11 7739.99 916.975 4
 -3 -5 -10 19279 1274.76 9
 -3 -5 -10 19135 1392.38 11
 -3 -5 -10 21691.6 1461.89 10
 -3 5 10 20908.1 1452.63 4
 -3 -5 -10 15983.1 2345.23 2
 -3 -5 -9 11568.7 949.407 9
 -3 -5 -9 8795.37 1714.2 2
 -3 5 9 11205.1 1024.71 4
 -3 -5 -9 12507 1088 11
 -3 -5 -9 13201.9 1099.21 10
 -3 -5 -8 19486.5 2397.16 2
 -3 -5 -8 22528.8 1472.5 11
 -3 5 8 22830.9 1448.75 4
 -3 -5 -8 24966.2 1524.06 10
 -3 -5 -7 78023.2 4834.48 2
 -3 -5 -6 14107.9 1851.04 2
 -3 -5 -5 6921.65 1338.08 2
 -3 -5 -4 27762.9 2420.54 2
 -3 -5 -3 41551.6 2888.14 2
 -3 -5 -2 26579.4 2180.64 2
 3 -5 1 43650.9 2957.15 1
 -3 -5 -1 42952.1 2739.38 2
 3 -5 0 10590.8 1400.52 1
 -3 5 -1 39172.9 3170.81 2
 3 -5 -1 42394.9 2805.46 1
 3 -5 -2 31038 2300.78 1
 -3 5 -2 25273.8 2594.26 2
 3 -5 -3 43822.9 2784.41 1
 -3 5 -3 46579 3508.21 2
 -3 5 -4 27294.4 2702.11 2
 -3 5 -5 8219.65 1545.75 2
 -3 5 -6 15541.5 2140.38 2
 -3 5 -7 73772 4940.53 2
 -3 -5 8 23564.7 1520.59 9
 -3 5 -8 20940 1237.48 12
 -3 5 -8 20773.5 2569.25 2
 -3 5 -8 22432.3 1285.66 5
 -3 5 -8 22169.6 1466.95 4
 3 -5 -8 24853 1467.99 7
 -3 -5 8 22824.8 1538.99 6
 -3 -5 9 12048.9 1101.3 9
 -3 5 -9 12555.4 1100.26 4
 3 -5 -9 10664.2 993.21 7
 -3 5 -9 13768.8 2136.04 2
 -3 5 -9 13286.3 952.572 12
 -3 5 -9 13437.1 991.902 5
 -3 -5 9 11524.9 1060.14 6
 -3 5 -10 20685.4 2633.51 2
 -3 -5 10 21116.9 1501.74 9
 -3 5 -10 19949.2 1266.16 5
 -3 -5 10 20883.3 1470.43 6
 3 -5 -10 17917.1 1320.91 7
 -3 -5 11 9424.21 959.611 6
 -3 -5 11 9797.51 1040.71 9
 3 -5 -11 8297.88 892.94 7
 -3 5 -11 8458.17 1676.98 2
 -3 -5 12 22637.4 1535.1 6
 3 -5 -12 22615.3 1515.43 7
 -3 -5 12 22741.6 1653.01 9
 -3 -5 13 4935.13 667.224 6
 -3 -5 13 3579.18 681.697 9
 3 -5 -13 3360.47 600.6 7
 -3 -5 14 15639 1181.39 6
 3 -5 -14 14484.6 1188.28 7
 -3 5 -14 17494.8 1299.12 11
 -3 5 -15 208.854 313.493 3
 3 -5 -15 12.1607 268.063 7
 -3 5 -16 811.699 379.13 3
 3 -5 -16 -159.668 300.073 7
 -3 5 -17 3289.2 514.969 3
 3 -5 -17 4633.93 551.766 7
 3 -5 -18 437.706 226.711 7
 -3 5 -18 557.318 246.903 3
 3 -5 -19 386.119 156.097 7
 3 -5 -19 -82.8486 91.7441 9
 -3 5 -19 302.378 163.771 3
 -3 6 18 1585.21 285.665 4
 3 6 -18 1216.92 262.672 7
 -3 -6 -18 1260.92 262.146 10
 -3 -6 -17 3878.49 475.141 10
 3 6 -17 4518.44 525.639 7
 -3 6 17 4493.98 513.696 4
 3 6 -17 3189.36 373.164 10
 -3 -6 -16 9928.98 763.89 9
 -3 6 16 12515.9 935.891 4
 3 6 -16 10948.8 915.824 7
 -3 -6 -16 10035.5 856.16 10
 3 6 -16 11549.8 801.186 10
 -3 -6 -15 1960.74 432.189 10
 -3 -6 -15 1683.09 369.101 9
 -3 6 15 1573.8 404.128 4
 3 6 -15 2234.4 408.263 10
 3 6 -15 2093.5 508.561 7
 3 6 -14 360.983 251.976 10
 -3 6 14 483.574 327.6 4
 -3 -6 -14 522.741 275.123 9
 3 6 -14 219.562 311.154 7
 -3 -6 -14 87.9033 280.179 10
 -3 -6 -13 22183.9 1384.85 9
 3 6 -13 22121.8 1581.82 7
 -3 -6 -13 22025.3 1482.78 10
 -3 -6 -13 20218.9 1358.03 11
 -3 6 13 21894.8 1480.88 4
 -3 6 12 1604.58 480.768 4
 -3 -6 -12 1880.49 432.322 9
 3 6 -12 2192.92 590.558 7
 -3 -6 -12 2003.61 497.52 11
 -3 -6 -12 2101.03 523.057 10
 -3 6 11 3352.05 622.774 4
 -3 -6 -11 2705.71 529.775 9
 -3 -6 -11 2795.85 607.398 10
 -3 -6 -11 3282.41 577.507 11
 3 -6 10 28760.2 3386.64 1
 -3 6 10 23702.8 1605.06 4
 -3 -6 -10 25411.5 2993.9 2
 -3 -6 -10 25551.3 1534.36 9
 -3 -6 -10 24794.9 1628.46 11
 -3 -6 -10 24948.7 1607.38 10
 -3 -6 -9 32697.3 1793.92 9
 -3 -6 -9 32670.1 3322.1 2
 -3 -6 -9 36710.1 2030.16 11
 -3 -6 -9 36672.1 1973.36 10
 -3 6 9 38780.4 2033.64 4
 -3 6 8 1258.12 396.268 4
 -3 -6 -8 1868.98 387.618 9
 -3 -6 -8 2554.74 1109.07 2
 -3 -6 -8 1135.62 404.664 11
 -3 -6 -8 1563.23 434.996 10
 -3 -6 -7 20365.9 1363.33 10
 -3 -6 -7 20226.5 1287.54 9
 -3 -6 -7 19341.6 2425.99 2
 -3 -6 -7 21129.3 1449.65 11
 -3 6 7 21351.8 1382.2 4
 -3 -6 -6 2467.87 1018.22 2
 -3 -6 -6 2015.14 505.444 11
 -3 6 6 1991.36 431.24 4
 3 -6 5 8102.66 1538.86 1
 -3 -6 -5 8220.48 1426.11 2
 3 -6 4 9013.62 1553.89 1
 -3 -6 -4 8800.11 1505.59 2
 3 -6 3 7437.44 1337.96 1
 3 -6 2 20113.4 2094.17 1
 3 -6 1 4914.98 1066.7 1
 3 -6 0 8.00896 696.3 1
 -3 6 -1 6942.56 1359.83 2
 3 -6 -1 7715.07 1292.63 1
 3 -6 -2 18025.8 1918.32 1
 -3 6 -2 19209.3 2291.36 2
 -3 6 -3 9609.63 1745.85 2
 3 -6 -3 7246.15 1198.74 1
 -3 6 -4 10444.9 1776.77 2
 -3 6 -5 10932.4 1916.76 2
 -3 -6 6 1601.25 409.581 9
 -3 6 -6 2110.13 375.143 5
 3 -6 -6 2338.31 432.068 7
 -3 6 -6 2069.05 414.352 4
 -3 6 -6 1878.39 845.078 2
 -3 6 -7 19906.2 1146.1 12
 -3 -6 7 22333.7 1476.9 9
 -3 6 -7 18634.5 2490.26 2
 -3 6 -7 19691.1 1348.3 4
 3 -6 -7 19596 1332.22 7
 -3 6 -7 20225.2 1196.61 5
 -3 -6 8 773.837 392.171 9
 -3 6 -8 1719.83 414.632 5
 3 -6 -8 1077.03 396.993 7
 -3 6 -8 1374.1 352.823 12
 -3 6 -8 1191.98 624.717 2
 -3 6 -8 1657.57 422.561 4
 -3 -6 9 38065.3 2063.24 6
 -3 -6 9 36571.3 2060.05 9
 -3 6 -9 33845.2 1737.3 5
 -3 6 -9 34987.4 1977.32 4
 3 -6 -9 35367.2 1935.09 7
 -3 6 -9 33671.3 3618.58 2
 -3 -6 10 28198.6 1751.56 6
 -3 6 -10 25273.7 3063 2
 -3 6 -10 26914 1509.92 5
 3 -6 -10 24045.3 1593.16 7
 -3 -6 10 24497 1697.04 9
 -3 -6 11 3923.22 678.833 6
 -3 -6 11 3824.13 697.141 9
 3 -6 -11 3462.75 623.078 7
 -3 -6 12 3259.9 611.086 6
 -3 -6 12 2954.98 659.381 9
 3 -6 -12 1827.28 493.958 7
 -3 -6 13 23205.3 1537.86 6
 -3 -6 13 23014 1648.66 9
 3 -6 -13 22212 1506.91 7
 -3 -6 14 385.622 331.184 6
 3 -6 -14 330.047 325.251 7
 -3 -6 15 1624.17 369.35 6
 -3 6 -15 3354.73 555.767 3
 3 -6 -15 1564.52 446.52 7
 -3 6 -16 10313.2 864.741 3
 3 -6 -16 12802.6 951.843 7
 -3 6 -17 3439.99 467.603 3
 3 -6 -17 4777.08 526.702 7
 3 -6 -18 1911.39 266.708 9
 3 -6 -18 1442.96 272.185 7
 -3 6 -18 1572.77 274.696 3
 -3 7 18 75.6248 128.732 4
 3 7 -18 111.886 116.124 7
 -3 7 17 2028.27 328.105 4
 3 7 -17 2254.12 342.229 7
 -3 -7 -17 1995.16 310.467 10
 -3 7 16 77.0039 229.133 4
 -3 -7 -16 -484.991 213.056 9
 3 7 -16 231.572 237.642 7
 -3 -7 -16 144.09 198.778 10
 -3 7 15 2415.42 441.956 4
 -3 -7 -15 1914.1 346.293 9
 3 7 -15 2162.55 340.356 10
 -3 -7 -15 2156.64 427.934 10
 3 7 -15 2482.78 482.984 7
 -3 7 14 6699.29 756.75 4
 -3 -7 -14 5434.47 624.234 9
 3 7 -14 6816.52 804.505 7
 -3 -7 -14 5402.65 692.882 10
 3 7 -14 7658.46 666.433 10
 3 7 -13 2153.62 449.964 10
 -3 -7 -13 2800.39 494.998 9
 3 7 -13 2393.45 577.739 7
 -3 7 13 2325.61 527.407 4
 -3 -7 -13 2147.49 502.165 10
 -3 -7 -12 553.917 329.545 9
 -3 -7 -12 356.989 321.418 10
 -3 -7 -12 406.598 320.77 11
 -3 7 12 272.885 330.284 4
 -3 7 11 990.919 433.215 4
 -3 -7 -11 1264.9 410.057 9
 -3 -7 -11 1077.56 393.789 10
 -3 -7 -11 1070.19 426.508 11
 -3 -7 -10 18408.5 1334.12 9
 -3 -7 -10 18089.3 1401.39 11
 -3 7 10 17843.9 1344.38 4
 -3 -7 -10 18290.1 1367.02 10
 3 -7 9 3908.53 1220.81 1
 -3 -7 -9 2394.21 501.318 9
 -3 7 9 4341.84 675.041 4
 -3 -7 -9 2976.19 586.63 10
 -3 -7 -9 3468.74 635.808 11
 -3 -7 -8 13897.9 1116.72 9
 3 -7 8 12525.8 2244.17 1
 -3 -7 -8 14483.8 1261.71 11
 -3 7 8 15847.2 1228.96 4
 -3 -7 -8 14213.5 1165.32 10
 -3 -7 -7 31413.3 1895.75 11
 -3 -7 -7 28926.9 1695.33 9
 3 -7 7 31908.4 3403.15 1
 -3 7 7 31816.9 1802.34 4
 -3 -7 -7 31489.7 1771.93 10
 -3 -7 -6 46738.6 2233.54 9
 -3 7 6 46081.8 2250.33 4
 3 -7 6 56174.4 4358.29 1
 -3 -7 -6 45338.4 2391.23 11
 -3 -7 -6 49517.7 2291.09 10
 -3 7 5 1968.3 440.847 4
 -3 -7 -5 1729.15 450.686 9
 3 -7 5 2468.49 925.27 1
 -3 -7 -5 1639.75 526.11 11
 -3 -7 -5 1206.86 440.565 10
 -3 -7 -4 45818 2143.07 9
 3 -7 4 46930 3835.47 1
 -3 -7 -4 47864.9 2364.85 11
 -3 7 4 43892.4 2126.09 4
 -3 7 3 24103.5 1438.61 4
 -3 -7 -3 26846.5 1663.86 11
 3 -7 3 22271.4 2518.39 1
 3 -7 2 9260.59 1568.12 1
 3 -7 1 44177.6 3513.64 1
 3 -7 0 2941.44 1001.63 1
 3 -7 -1 46938.3 3569.4 1
 -3 7 -1 42827.9 3766.56 2
 -3 7 -2 7260.33 1620.55 2
 3 -7 -2 8317.76 1428.63 1
 -3 -7 3 21467.7 1410.09 9
 -3 7 -3 19598.9 2549.46 2
 -3 7 -3 23333.7 1397.09 4
 -3 -7 4 45072.3 2135.49 8
 -3 7 -4 44100.1 1918.37 5
 -3 7 -4 45733.9 3916.74 2
 3 -7 -4 41017.8 2082.77 7
 -3 7 -4 47412.3 2172.53 4
 -3 -7 4 45847.9 2230.35 9
 -3 7 -5 371.833 687.274 2
 -3 -7 5 1187.86 420.818 9
 -3 7 -5 1874.18 386.281 5
 3 -7 -5 1672.2 412.962 7
 -3 7 -5 1568.22 426.565 4
 -3 -7 6 51727 2457.8 9
 -3 7 -6 44507.8 4046.67 2
 -3 7 -6 50112.2 2109.24 5
 3 -7 -6 46982.7 2309.04 7
 -3 7 -6 50559.7 2346.96 4
 -3 -7 7 33626.6 1941.5 9
 -3 7 -7 32009.4 3426.61 2
 -3 7 -7 33039.5 1644.74 5
 3 -7 -7 35156.8 1908.29 7
 -3 7 -7 33597.7 1867.81 4
 -3 7 -7 31501.6 1543.4 12
 -3 -7 8 16533.5 1324.84 9
 -3 7 -8 17686 2634.1 2
 -3 7 -8 15139.7 1071.61 5
 -3 7 -8 14728.3 1221.53 4
 3 -7 -8 17824 1311.53 7
 -3 -7 9 2803.01 607.402 6
 -3 -7 9 4186.82 734.304 9
 -3 7 -9 3306.03 506.193 5
 3 -7 -9 3632.88 599.143 7
 -3 7 -9 2552.1 526.941 4
 -3 7 -9 4486.52 1334.81 2
 -3 -7 10 19745.9 1470.76 6
 -3 -7 10 18746.2 1445.73 9
 -3 7 -10 17707.1 1192.05 5
 3 -7 -10 16372.6 1294.97 7
 -3 -7 11 1098.57 440.496 6
 -3 -7 11 1259.55 507.685 9
 3 -7 -11 1618.42 477.238 7
 -3 -7 12 -72.3852 324.117 6
 3 -7 -12 54.0198 292.626 7
 -3 -7 12 278.289 417.847 9
 -3 -7 13 1661.08 489.399 6
 -3 -7 13 2451.17 597.302 9
 3 -7 -13 1885 460.652 7
 -3 -7 14 6698.77 757.264 6
 3 -7 -14 7032.1 775.168 7
 -3 -7 15 2016.33 398.615 6
 -3 7 -15 2592.57 478.515 3
 3 -7 -15 2548.64 466.744 7
 3 -7 -16 226.731 164.61 9
 -3 7 -16 260.239 229.636 3
 3 -7 -16 89.9696 228.633 7
 3 -7 -17 1792.01 269.552 9
 -3 7 -17 2015.56 326.245 3
 3 -7 -17 2462.31 365.944 7
 3 8 -17 7906.56 535.036 7
 -3 8 17 7944.76 531.093 4
 -3 -8 -16 3056.92 350.111 9
 -3 8 16 3713.16 427.89 4
 3 8 -16 3662.39 451.619 7
 -3 -8 -15 7140.15 598.435 10
 -3 -8 -15 7807.24 639.22 9
 3 8 -15 7482.52 720.927 7
 -3 8 15 9021.84 731.576 4
 -3 -8 -14 9008.58 764.411 9
 -3 8 14 11296.6 894.429 4
 3 8 -14 10673.8 938.079 7
 -3 -8 -14 9110.95 771.967 10
 -3 -8 -13 2231.38 469.219 9
 3 8 -13 3315.39 614.624 7
 -3 8 13 2413.23 489.116 4
 -3 -8 -13 2220.74 472.974 10
 -3 -8 -12 10962.9 955.027 9
 -3 -8 -12 12132.7 1033.68 11
 -3 -8 -12 10103.6 956.563 10
 -3 8 12 10780.8 1004.11 4
 -3 -8 -11 15540.1 1227.89 11
 -3 -8 -11 16525.8 1230.95 9
 -3 -8 -11 15899.5 1181.65 10
 -3 8 11 16038.6 1259.69 4
 -3 -8 -10 30959.3 1776.22 9
 -3 -8 -10 29474.8 1822.42 11
 -3 -8 -10 34851.1 1854.6 10
 -3 8 10 29203 1788.1 4
 -3 -8 -9 12691.8 1092.54 9
 -3 -8 -9 12966.2 1198.1 11
 -3 8 9 12362.2 1116.98 4
 -3 -8 -9 12481 1078.13 10
 -3 -8 -8 14382.6 1175.86 9
 -3 -8 -8 14024.7 1154.23 10
 -3 -8 -8 12922.3 1211.92 11
 -3 8 8 13704.5 1174.53 4
 3 -8 7 55725.7 4697.87 1
 -3 -8 -7 45448.6 2303.21 9
 -3 -8 -7 44869.3 2422.5 11
 -3 -8 -7 49548.9 2307.5 10
 -3 8 7 45114.3 2281.78 4
 -3 -8 -6 10613 980.975 9
 3 -8 6 11153.4 2088.06 1
 -3 8 6 9099.06 924.585 4
 -3 -8 -6 11350.5 1156.77 11
 -3 -8 -5 20011.1 1382.14 9
 -3 -8 -5 22074.6 1575.43 11
 -3 8 5 18035.4 1310.4 4
 3 -8 5 21278.3 2804.2 1
 -3 8 4 1654.91 424.307 4
 -3 -8 -4 569.448 303.76 9
 3 -8 4 -595.7 459.736 1
 -3 -8 -4 1115 513.809 11
 -3 -8 -3 5147.12 686.375 9
 -3 8 3 6264.01 730.736 4
 3 -8 3 4603.87 1349.55 1
 -3 -8 -3 5401.37 801.057 11
 -3 -8 -2 4485.35 719.111 11
 3 -8 2 5181.09 1301.34 1
 -3 8 2 4520.77 629.824 4
 -3 -8 -2 4755.62 683.161 9
 3 -8 1 21915.7 2629.91 1
 -3 -8 -1 18856.2 1347.1 9
 -3 -8 -1 20994.8 1513.56 11
 -3 8 1 19597.8 1327.76 4
 3 -8 0 2211.38 866.458 1
 -3 8 0 1019.27 322.257 4
 -3 -8 0 776.407 367.921 9
 -3 -8 1 19933.1 1396.47 9
 3 -8 -1 24327.3 2778.85 1
 -3 -8 1 20322.8 1290.02 8
 -3 8 -1 21203.7 2691.89 2
 -3 8 -1 21399 1370.89 4
 3 -8 -2 3830.34 608.609 7
 -3 -8 2 4397.19 676.483 9
 -3 8 -2 4025.99 1398.65 2
 -3 -8 2 4559.04 637.501 8
 3 -8 -2 4304.51 1220.3 1
 -3 8 -2 4801.92 629.546 4
 -3 -8 3 5390.65 745.605 9
 -3 -8 3 4911.86 682.054 8
 -3 8 -3 5552.73 575.57 5
 3 -8 -3 5196.94 696.635 7
 -3 8 -3 6013.03 710.14 4
 -3 8 -3 4175.27 1329.44 2
 3 -8 -4 1398.24 433.324 7
 -3 -8 4 777.014 382.914 9
 -3 -8 4 580.578 376.252 8
 -3 8 -4 660.448 275.461 5
 -3 8 -4 -428.079 722.636 2
 -3 8 -4 759.666 318.433 4
 -3 -8 5 21774 1491.09 9
 -3 8 -5 19628.9 1181.93 5
 -3 8 -5 22013.5 2876.87 2
 3 -8 -5 19664 1389.08 7
 -3 8 -5 18391.4 1327.2 4
 -3 -8 6 11333.2 1101.64 9
 -3 8 -6 13069.1 933.522 5
 3 -8 -6 10329.7 1013.62 7
 -3 8 -6 10125.4 986.923 4
 -3 8 -6 12808.2 2274.04 2
 -3 -8 7 44643.6 2353.57 9
 -3 8 -7 45989.4 4178.71 2
 -3 8 -7 45552.7 2014.92 5
 -3 8 -7 44165.3 2254.22 4
 3 -8 -7 43628.5 2283.31 7
 -3 -8 8 15490.2 1294.31 9
 -3 8 -8 14038.4 1022.39 5
 -3 8 -8 13005.8 1132.78 4
 3 -8 -8 12697 1143.92 7
 -3 -8 9 12112.5 1154.7 9
 -3 8 -9 11518 924.856 5
 -3 8 -9 11443.8 1062.56 4
 3 -8 -9 12159 1097.9 7
 -3 -8 9 11786 1116.08 6
 -3 -8 10 26551 1734.78 6
 -3 -8 10 29619.3 1876.13 9
 3 -8 -10 28358 1549.38 9
 3 -8 -10 27516.6 1733.07 7
 -3 -8 11 15095.9 1237.21 6
 -3 -8 11 14137.2 1263.98 9
 3 -8 -11 14927.1 1070.16 9
 3 -8 -11 15667.2 1238.09 7
 -3 -8 12 10488.8 1010.03 6
 -3 -8 12 11756.2 1117.47 9
 3 -8 -12 11303.9 907.447 9
 3 -8 -12 10943 1016.5 7
 -3 -8 13 2223.36 502.888 6
 -3 -8 13 2964.44 582.412 9
 3 -8 -13 2035.88 384.139 9
 3 -8 -13 2224.97 469.872 7
 -3 -8 14 8777.09 804.328 6
 3 -8 -14 10135.4 763.669 9
 3 -8 -14 12118.8 940.26 7
 -3 -8 15 5664.98 568.822 6
 3 -8 -15 7632.81 594.303 9
 -3 8 -15 7115.36 636.811 3
 3 -8 -15 7934.32 712.174 7
 3 -8 -16 3751.92 416.31 9
 -3 8 -16 2455.68 341.949 3
 3 -8 -16 4048.61 455.132 7
 3 -8 -17 7475.05 532.54 7
 -3 9 16 1248.93 231.651 4
 3 9 -16 1564.97 254.673 7
 -3 -9 -15 87.5862 165.841 9
 3 9 -15 108.916 177.671 7
 -3 9 15 -48.4354 146.307 4
 -3 -9 -14 4251.99 493.956 9
 3 9 -14 4823.05 568.43 7
 -3 9 14 4316.09 505.302 4
 3 9 -13 2326.59 467.015 7
 -3 9 13 2385.42 452.137 4
 -3 -9 -13 2350.32 428.846 9
 -3 -9 -12 95.0486 261.418 9
 -3 9 12 -49.4667 255.006 4
 3 9 -12 535.028 294.542 7
 -3 -9 -11 5096.68 665.927 9
 -3 9 11 3967.26 604.693 4
 -3 -9 -10 29058.4 1692.38 9
 -3 9 10 28840 1710.79 4
 -3 -9 -9 4045.92 663.78 9
 -3 -9 -9 4179.23 717.267 11
 -3 9 9 4092.55 642.911 4
 -3 -9 -8 8951.87 926.332 9
 -3 9 8 7566.22 880.263 4
 -3 -9 -8 8476.48 1001.47 11
 -3 -9 -7 44123.1 2240.49 9
 -3 -9 -7 41707.4 2310.48 11
 -3 9 7 38730.2 2112.59 4
 -3 -9 -6 67575.3 3178.18 11
 -3 -9 -6 73641.1 3113.31 9
 -3 9 6 66502.1 2951.57 4
 -3 9 5 -3.28908 321.257 4
 -3 -9 -5 -58.3569 338.591 9
 -3 -9 -5 757.934 461.929 11
 3 -9 5 315.153 1032.02 1
 -3 -9 -4 50468.6 2651.39 11
 -3 -9 -4 51958 2522.99 9
 -3 9 4 51047.3 2453.14 4
 3 -9 4 56603.3 4764.22 1
 3 -9 3 66557 5138.31 1
 -3 -9 -3 66315.7 2893.4 9
 -3 9 3 56645.3 2686.21 4
 -3 -9 -3 63044.9 3031.4 11
 3 -9 2 45058.8 4159.81 1
 3 -9 2 40123.3 2006.92 8
 -3 -9 -2 38403.2 2080.61 9
 -3 9 2 36071.5 1974.46 4
 -3 -9 -1 48757 2413.02 9
 3 -9 1 48842.7 4339.6 1
 -3 -9 -1 46127.2 2170.65 8
 3 -9 1 47563.7 2286.63 8
 -3 9 1 51027.9 2370.32 4
 -3 -9 0 1873.37 511.68 9
 3 -9 0 -303.623 654.075 1
 -3 9 0 1366.52 425.282 4
 -3 9 0 2040.21 1017.32 2
 -3 -9 0 753.818 318.84 8
 3 -9 0 1323.6 420.411 8
 -3 -9 1 55300.8 2540.2 9
 -3 -9 1 48794.8 2305.87 8
 -3 9 -1 49132.3 2084.52 5
 -3 9 -1 48053 4384.42 2
 3 -9 -1 47422.9 4216.83 1
 -3 9 -1 48700.5 2352.41 4
 -3 -9 2 38831.2 2125.97 9
 -3 9 -2 42395.7 1837.14 5
 -3 -9 2 37871.3 2008.02 8
 -3 9 -2 35206.5 3728.32 2
 -3 9 -2 41347.4 2090.01 4
 -3 -9 3 59240.5 2765.15 9
 -3 9 -3 58729 2334.5 5
 -3 -9 3 55767.8 2603.66 8
 -3 9 -3 63403.4 5060.26 2
 3 -9 -3 56660.9 2711.91 7
 -3 9 -3 57673.9 2620.01 4
 -3 -9 4 51870.1 2550.36 9
 -3 9 -4 50948.3 2136.7 5
 -3 9 -4 56788.9 4763.16 2
 3 -9 -4 48664.3 2473.56 7
 -3 9 -4 50387.5 2408.97 4
 3 -9 -5 39.5026 317.767 7
 -3 9 -5 -208.6 615.114 2
 -3 -9 5 279.898 373.469 9
 -3 9 -5 722.887 265.437 5
 -3 9 -5 -353.589 312.345 4
 -3 -9 6 67174.5 3015.03 9
 -3 9 -6 64681.1 2556.95 5
 3 -9 -6 65589.8 2976.68 7
 -3 9 -6 64549.4 2855.69 4
 -3 -9 7 39489.4 2192.6 9
 -3 9 -7 39865.2 1827.06 5
 -3 9 -7 39329.3 2080.2 4
 3 -9 -7 37778.7 2120.59 7
 -3 -9 8 8593.8 992.077 6
 -3 -9 8 8582.9 979.676 9
 -3 9 -8 9185.67 768.248 5
 -3 9 -8 9500.59 929.959 4
 3 -9 -8 8976.72 987.395 7
 -3 -9 9 3268.12 651.75 6
 -3 -9 9 3566.08 683.186 9
 3 -9 -9 4146.55 663.462 7
 -3 9 -9 4160.9 654.966 4
 -3 -9 10 29469.6 1830.14 9
 -3 -9 10 30942.1 1814.69 6
 3 -9 -10 26711.1 1694.89 7
 -3 -9 11 4344.81 684.397 9
 -3 -9 11 3060.71 575.245 6
 3 -9 -11 4391.53 682.313 7
 -3 -9 12 92.7083 294.838 6
 -3 -9 12 -28.7468 291.104 9
 3 -9 -12 363.064 228.154 9
 3 -9 -12 305.738 340.121 7
 3 -9 -13 3067.37 496.163 7
 -3 -9 13 2078.39 415.761 6
 -3 -9 13 2078.35 482.727 9
 3 -9 -13 1895.21 333.574 9
 -3 -9 14 3925.9 476.081 6
 3 -9 -14 4708.33 440.696 9
 -3 9 -14 4136.84 480.288 3
 3 -9 -14 4367.91 544.123 7
 -3 9 -14 4282.64 471.887 11
 -3 -9 15 -72.8658 178.605 6
 -3 9 -15 -34.3414 204.616 3
 3 -9 -15 190.266 208.076 7
 3 -9 -16 2378.45 310.317 7
 3 10 -15 20451.8 928.602 7
 -3 10 14 870.714 225.383 4
 -3 -10 -14 1045.41 235.1 9
 3 10 -14 749.851 221.81 7
 -3 10 13 2909.95 421.585 4
 -3 -10 -13 2878.54 411.381 9
 3 10 -13 2950.51 449.961 7
 -3 10 12 2129.16 408.752 4
 -3 -10 -12 2626.02 427.423 9
 3 10 -12 2169.91 455.326 7
 -3 -10 -11 11703.8 937.995 9
 -3 10 11 11379.6 913.63 4
 -3 10 10 2179.75 460.217 4
 -3 -10 -10 2556.14 523.494 9
 -3 -10 -9 29997.6 1720.78 9
 -3 10 9 31071.1 1726.64 4
 -3 -10 -8 6832.94 830.846 9
 -3 10 8 7796.19 823.149 4
 -3 -10 -7 11183 1052.4 9
 -3 10 7 10210.8 946.254 4
 -3 -10 -6 9871.53 1003.43 9
 -3 10 6 7801.14 873.343 4
 -3 10 5 30358.4 1776.03 4
 -3 -10 -5 32580.1 1900.79 9
 -3 10 4 676.215 375.627 4
 -3 -10 -4 512.702 410.467 9
 -3 -10 -3 8863.69 978.195 9
 3 -10 3 8536.93 856.882 8
 -3 10 3 8663.06 907.565 4
 -3 -10 -2 32534.5 1907.39 9
 -3 -10 -2 30926.8 1687.84 8
 3 -10 2 32444.2 1793.71 8
 -3 10 2 30562.7 1775.68 4
 -3 -10 -1 49803.7 2471.27 9
 -3 -10 -1 48146.2 2278.62 8
 3 -10 1 49763.5 2376.31 8
 -3 10 1 49047.2 2360.27 4
 -3 -10 0 9673.08 1018.62 9
 -3 -10 0 10477.5 949.135 8
 3 -10 0 9512.48 959.938 8
 -3 10 0 9914.01 945.146 4
 -3 -10 1 49786.2 2379.91 6
 -3 -10 1 48376 2288.35 8
 3 -10 -1 47816.6 2368.4 8
 -3 10 -1 47411.9 2298.98 4
 -3 -10 1 46907.1 2407.44 9
 -3 -10 2 29516.2 1830.43 9
 -3 -10 2 28328.9 1707.83 8
 3 -10 -2 30017.5 1802.45 8
 -3 10 -2 31428.2 1763.21 4
 -3 -10 3 9865.4 1034.9 9
 -3 -10 3 8272.37 909.016 8
 -3 10 -3 9478.22 915.688 4
 -3 -10 4 657.682 448.896 9
 -3 10 -4 297.295 255.737 4
 -3 -10 5 29788 1829.36 9
 3 -10 -5 28851.9 1807.1 7
 -3 10 -5 29290.9 1696.83 4
 -3 -10 6 8085.37 943.309 9
 3 -10 -6 7857.67 931.966 7
 -3 10 -6 8331.99 838.593 4
 -3 -10 7 9893.94 1007.74 6
 -3 10 -7 11907.4 1012.03 4
 3 -10 -7 9475.94 997.32 7
 -3 -10 7 10221.6 1057.1 9
 -3 -10 8 7569.51 867.606 6
 -3 -10 8 6408 859.431 9
 -3 10 -8 6555.18 749.868 4
 3 -10 -8 7626.46 885.657 7
 -3 -10 9 27721 1717.55 6
 -3 -10 9 29967.9 1788.78 9
 3 -10 -9 29185.7 1752.15 7
 -3 -10 10 2140.4 495.669 6
 -3 -10 10 2487.17 549.698 9
 3 -10 -10 2022.44 464.572 7
 -3 -10 11 11813.9 1001.39 6
 -3 -10 11 11674.8 1010.46 9
 3 -10 -11 12074.6 1001.77 7
 -3 -10 12 1834.98 410.383 6
 -3 -10 12 1759.92 422.586 9
 3 -10 -12 1596.81 384.974 7
 -3 -10 13 2862.3 463.487 9
 -3 -10 13 2166.84 394.295 6
 3 -10 -13 3206.69 492.059 7
 -3 -10 14 747.459 236.551 6
 3 -10 -14 722.584 252.44 7
 -3 10 -14 838.162 209.181 3
 -3 11 13 695.272 181.282 4
 -3 -11 -13 941.453 187.958 9
 3 11 -13 784.269 184.671 7
 -3 11 12 685.538 199.771 4
 -3 -11 -12 582.671 232.272 9
 3 11 -12 860.846 258.506 7
 -3 11 11 1070.75 299.2 4
 -3 -11 -11 1170.54 328.789 9
 -3 -11 -10 9352.78 811.51 9
 -3 11 10 8571.21 746.207 4
 -3 11 9 2361.51 446.803 4
 -3 -11 -9 2739.24 515.261 9
 -3 11 8 2493.14 444.848 4
 -3 -11 -8 1410.55 414.467 9
 -3 -11 -7 8186.36 886.707 9
 -3 11 7 8328.79 810.841 4
 -3 -11 -6 7821.32 875.994 9
 -3 11 6 7827.02 804.844 4
 -3 -11 -5 556.857 352.828 9
 -3 11 5 616.896 313.139 4
 -3 -11 -4 17299.5 1328.16 9
 3 -11 4 14803.7 1126.75 8
 -3 11 4 17551.5 1234.46 4
 -3 -11 -3 1798.11 515.554 9
 3 -11 3 2260.39 456.594 8
 -3 11 3 1877.96 391.838 4
 -3 -11 -2 539.534 422.229 9
 -3 -11 -2 980.908 318.843 8
 3 -11 2 1071.27 390.281 8
 -3 11 2 426.225 322.694 4
 -3 -11 -1 2383.63 564.266 9
 -3 -11 -1 1471.84 401.814 8
 3 -11 1 1338.92 462.573 8
 -3 11 1 1715.97 407.655 4
 -3 -11 0 42698.5 2213.39 9
 -3 -11 0 38854.9 2001.76 8
 3 -11 0 39570.5 2074.39 8
 -3 11 0 41079.6 2039.54 4
 -3 -11 1 1510.29 477.428 9
 -3 -11 1 903.989 389.352 8
 3 -11 -1 1343.09 416.807 8
 -3 11 -1 1141.74 357.393 4
 -3 -11 2 288.249 203.425 6
 -3 -11 2 3.51616 341.356 9
 -3 -11 2 282.55 290.871 8
 3 -11 -2 720.678 375.043 8
 -3 11 -2 450.411 313.158 4
 -3 -11 3 1866.78 464.344 6
 -3 -11 3 1746.76 497.436 9
 3 -11 -3 1400.87 471.324 8
 -3 11 -3 1946.95 432.262 4
 -3 -11 4 17458.6 1275.56 6
 -3 -11 4 16553 1316.26 9
 3 -11 -4 16070.6 1274.2 8
 -3 11 -4 16220.2 1174.24 4
 -3 -11 5 250.019 262.466 6
 -3 -11 5 531.947 396.192 9
 -3 11 -5 804.664 342.304 4
 -3 -11 6 7504.66 840.132 6
 -3 -11 6 6564.09 828.486 9
 -3 11 -6 7410.55 746.128 4
 -3 -11 7 7675.51 830.261 6
 -3 -11 7 8399.94 893.63 9
 -3 11 -7 9013.32 813.676 4
 -3 -11 8 1431.31 421.765 6
 -3 -11 8 1714.54 462.013 9
 -3 -11 9 2741.93 535.09 9
 -3 -11 9 2102.15 477.159 6
 -3 -11 10 10151.9 849.723 6
 -3 -11 10 9113.75 849.926 9
 -3 -11 11 1092.03 323.181 6
 -3 -11 11 896.641 323.814 9
 -3 -11 12 565.678 204.796 6
 -3 -11 12 209.734 348.77 9
 -3 -11 13 761.977 223.224 6
 -3 -12 -11 884.504 223.712 9
 -3 12 11 917.416 184.36 4
 3 12 -11 865.198 225.697 7
 -3 -12 -10 14141.3 860.94 9
 -3 12 10 11256.8 715.61 4
 -3 -12 -9 10812.1 825.045 9
 -3 12 9 10645.6 737.98 4
 -3 -12 -8 990.156 345.05 9
 -3 12 8 735.103 251.525 4
 -3 -12 -7 3379.32 540.32 9
 -3 12 7 3257.69 472.873 4
 -3 -12 -6 9533.39 895.923 9
 -3 12 6 8457.85 748.646 4
 -3 -12 -5 10092.3 935.542 9
 -3 12 5 7754.47 737.153 4
 -3 -12 -4 5775.63 739.735 9
 3 -12 4 4486.99 592.951 8
 -3 12 4 5835.99 649.062 4
 -3 -12 -3 1793.25 504.055 9
 3 -12 3 1607.22 373.175 8
 -3 12 3 1473.23 333.254 4
 -3 -12 -2 487.563 397.898 9
 -3 -12 -2 256.592 192.697 8
 3 -12 2 116.595 250.686 8
 -3 12 2 25.721 231.564 4
 -3 -12 -1 11892 1067.8 9
 -3 -12 -1 11158.1 927.763 8
 3 -12 1 11411.8 967.739 8
 -3 12 1 12486.9 963.301 4
 -3 -12 0 5016.01 724.777 9
 -3 -12 0 3951.28 596.385 8
 3 -12 0 5193.91 696.221 8
 -3 12 0 5962.02 665.102 4
 -3 -12 1 13263.6 1109.25 9
 3 -12 -1 12779.8 1031.77 8
 -3 12 -1 12898.5 975.49 4
 -3 -12 2 341.026 344.383 9
 3 -12 -2 78.0382 328.647 8
 -3 12 -2 418.265 258.119 4
 -3 -12 3 1239.82 337.045 6
 -3 -12 3 1710.63 484.15 9
 3 -12 -3 818.329 346.325 8
 -3 12 -3 1680.92 358.601 4
 -3 -12 4 6043.45 655.64 6
 -3 -12 4 5959.44 746.151 9
 3 -12 -4 5999 704.424 8
 -3 12 -4 5981.68 641.728 4
 -3 -12 5 7332.99 763.003 6
 -3 -12 5 7788.44 844.461 9
 3 -12 -5 9446.36 857.05 8
 -3 12 -5 7332.44 692.319 4
 -3 -12 6 8423.1 849.685 9
 3 -12 -6 9549 850.496 8
 -3 12 -6 7206.97 672.394 4
 -3 -12 6 7752.58 769.893 6
 -3 -12 7 3495.42 559.429 9
 -3 -12 7 2465.59 471.102 6
 3 -12 -7 2942.5 518.234 8
 -3 -12 8 823.045 300.712 6
 -3 -12 8 1284.62 363.86 9
 3 -12 -8 996.797 338.376 8
 -3 -12 9 10751.1 838.048 6
 -3 -12 9 10368.9 837.842 9
 3 -12 -9 10784.5 818.184 8
 -3 -12 10 9250.21 740.021 6
 -3 -12 10 11821 869.413 9
 3 -12 -10 12126.2 802.807 8
 -3 -12 11 445.787 211.765 6
 -3 -12 11 486.046 219.824 9
 3 -12 -11 891.562 227.756 8
 3 13 -9 1948.32 286.108 7
 -3 -13 -9 1994.85 292.51 9
 -3 -13 -8 762.538 234.951 9
 -3 -13 -7 652.733 286.382 9
 -3 13 7 787.383 198.991 4
 -3 -13 -6 3004.19 461.678 9
 -3 13 6 2880.58 340.497 4
 -3 -13 -5 1955.12 417.391 9
 -3 13 5 1900.52 292.211 4
 -3 13 4 1444.9 298.728 4
 -3 -13 -4 1632.22 396.831 9
 -3 -13 -3 4278.44 599.666 9
 3 -13 3 4897.43 538.546 8
 -3 13 3 5285.22 515.866 4
 -3 -13 -2 452.296 313.35 9
 3 -13 2 -79.8026 190.433 8
 -3 13 2 790.649 272.974 4
 -3 -13 -1 4839.57 627.3 9
 3 -13 1 4452.2 546.516 8
 -3 13 1 5039 512.986 4
 -3 -13 0 4413.8 609.801 9
 3 -13 0 3246.69 482.497 8
 -3 13 0 3627.35 430.47 4
 -3 -13 1 3633.67 562.769 9
 3 -13 -1 4190.13 546.576 8
 -3 13 -1 3595.76 426.829 4
 -3 -13 2 491.782 303.485 9
 3 -13 -2 272.213 277.748 8
 -3 -13 3 5615.5 664.354 9
 3 -13 -3 5377.04 618.091 8
 -3 -13 4 1040.71 281.75 6
 -3 -13 4 1599.48 398.862 9
 3 -13 -4 1659.59 389.582 8
 -3 -13 5 965.087 283.62 6
 -3 -13 5 2330.86 400.473 9
 3 -13 -5 1798.96 357.057 8
 -3 -13 6 2632.09 398.591 6
 -3 -13 6 2393.03 424.549 9
 3 -13 -6 2676.25 415.887 8
 -3 -13 7 443.817 228.261 6
 -3 -13 7 852.497 275.963 9
 3 -13 -7 670.478 246.073 8
 -3 -13 8 267.722 166.304 6
 -3 -13 8 539.909 213.416 9
 3 -13 -8 186.562 187.738 8
 -3 -13 9 1448.93 270.904 6
 -3 -13 9 1392.15 269.078 9
 3 -13 -9 1681.75 271.126 8
 -3 -14 -6 4861.89 429.583 9
 -3 -14 -5 1376.94 265.577 9
 -3 -14 -4 4776.85 492.439 9
 -3 -14 -3 1695.72 327.91 9
 -3 -14 -2 2549.8 388.902 9
 -3 -14 -1 3765.46 468.65 9
 3 -14 1 3077.32 376.343 8
 -3 -14 0 290.605 239.454 9
 3 -14 0 460.113 214.561 8
 -3 -14 1 2746.3 397.764 9
 3 -14 -1 2939.91 374.647 8
 -3 -14 2 1832.02 342.735 9
 3 -14 -2 1520.09 278.265 8
 -3 -14 3 1118.28 291.096 9
 3 -14 -3 1667.66 303.087 8
 -3 -14 4 5195.65 506.013 9
 3 -14 -4 5813.24 482.173 8
 -3 -14 5 933.808 220.03 9
 3 -14 -5 1157.16 238.564 8
 3 -14 -6 4345.8 382.032 8
 -3 -14 6 4288.39 401.851 9
 -4 0 0 38084.7 2397.74 2
 -4 0 -1 32792.7 2295.58 2
 -4 0 1 33011.3 2082.73 2
 -4 0 2 39087.4 2117.64 2
 -4 0 -2 31831.4 2412.37 2
 -4 0 -3 31641 2460.61 2
 -4 0 -4 23225.7 2198.34 2
 -4 0 -5 97326.5 5129.67 2
 -4 0 -6 9057.11 1549.64 2
 -4 0 -7 1953.41 855.533 2
 -4 0 -8 17385 2241.06 2
 -4 0 -9 72319.5 2760.59 12
 -4 0 -9 71131.9 2713.7 5
 4 0 -9 72735.5 2925.31 7
 -4 0 -9 67555.2 2892.93 10
 -4 0 -9 73605.4 3118.8 11
 -4 0 -9 75772.6 5026.72 2
 -4 0 9 72810.2 2908.14 6
 -4 0 -10 381.653 287.868 10
 -4 0 10 1266.47 350.537 6
 4 0 -10 911.414 325.41 7
 -4 0 -10 139.575 849.461 2
 -4 0 -10 217.658 352.194 11
 -4 0 11 3554.2 525.774 6
 -4 0 -11 5118.05 657.324 3
 -4 0 -11 4733.4 722.03 11
 4 0 -11 3355.17 591.218 7
 -4 0 -11 4019.69 1363.46 2
 -4 0 -11 4848.22 715.824 10
 -4 0 -12 7929.06 937.912 11
 -4 0 -12 7868.25 830.73 3
 4 0 -12 5939.9 770.404 7
 -4 0 -12 8094.45 1918.22 2
 -4 0 -12 7794.52 912.511 10
 -4 0 -13 58429.6 2630.09 3
 -4 0 -13 57940.9 2725.92 11
 4 0 -13 57570.4 2653.64 7
 -4 0 -13 56237.9 2773.16 10
 -4 0 -14 4198.47 707.444 10
 -4 0 -14 4413.45 649.327 3
 4 0 -14 6119.3 813.97 7
 -4 0 -14 5956.23 749.29 11
 4 0 -14 5560.31 746.188 10
 -4 0 -15 3847.38 635.69 10
 4 0 -15 3410.26 591.2 10
 -4 0 -15 3704.52 575.026 3
 4 0 -15 3582.61 614.965 7
 -4 0 -15 3699.37 567.361 11
 -4 0 -16 1035.54 369.423 10
 4 0 -16 80.8283 258.08 10
 -4 0 -16 1191.56 410.28 3
 4 0 -16 770.168 321.152 7
 -4 0 -17 20123.7 1285.68 10
 -4 0 -17 19953.9 1200.57 3
 4 0 -17 20871.5 1267.87 7
 4 0 -17 22167.1 1243.05 10
 4 0 -18 1380.02 312.609 10
 -4 0 -18 949.345 293.487 3
 4 0 -18 1890.2 364.736 7
 -4 0 -18 774.614 260.895 10
 4 0 -19 14261.3 807.301 7
 -4 0 -19 11118.7 700.191 10
 4 0 -19 14940.7 786.607 10
 4 1 -19 1117.94 252.059 7
 4 1 -19 1217.76 247.342 10
 -4 -1 -19 1198.82 272.507 10
 -4 -1 -18 4985.58 575.529 10
 4 1 -18 4972.59 551.517 7
 4 1 -18 5550.79 532.096 10
 -4 -1 -17 202.628 309.916 10
 -4 -1 -17 187.871 235.219 3
 4 1 -17 17.3921 277.137 7
 4 1 -17 538.215 305.739 10
 -4 -1 -16 1546.81 485.195 10
 4 1 -16 2252.72 489.06 10
 -4 -1 -16 1906.44 450.701 3
 4 1 -16 1730.76 432.234 7
 4 1 -15 91.899 344.418 10
 -4 1 15 175.6 206.425 4
 -4 -1 -15 32.895 259.006 3
 4 1 -15 248.974 297.845 7
 -4 -1 -15 89.1633 313.814 10
 -4 -1 -15 92.9696 290.781 11
 -4 -1 -14 2986.84 640.465 10
 -4 1 14 3786.68 560.343 4
 -4 -1 -14 4420.79 675.028 11
 -4 -1 -14 3210.42 563.049 3
 4 1 -14 2037.72 520.87 7
 -4 -1 -13 7276.17 872.191 11
 -4 -1 -13 8045.81 844.35 3
 4 1 -13 6127.83 790.47 7
 -4 -1 -13 7523.44 906.63 10
 -4 1 13 7016.39 761.302 4
 -4 -1 -12 4849.46 631.11 3
 4 1 -12 3345.17 603.364 7
 -4 -1 -12 5052.51 712.369 11
 -4 -1 -12 4102.86 1445.66 2
 -4 -1 -12 6417.24 787.461 10
 -4 1 12 5287.05 627.003 4
 -4 -1 -11 4213.72 607.191 3
 4 1 -11 3252.01 560.649 7
 -4 -1 -11 4690.65 689.617 11
 -4 -1 -11 5323.37 1407.4 2
 -4 -1 -11 4463.91 708.568 10
 -4 -1 -10 10739.4 912.65 3
 -4 -1 -10 9493.16 1899.38 2
 4 1 -10 8457.6 878.768 7
 -4 -1 -10 10736.9 1024.72 11
 -4 -1 -10 9316.58 952.116 10
 -4 -1 -9 465.352 272.567 10
 -4 1 9 924.58 296.19 6
 4 1 -9 58.9542 326.236 7
 -4 -1 -9 -451.722 491.825 2
 -4 -1 -9 90.6743 204.475 11
 -4 -1 -8 9561.63 916.77 11
 -4 -1 -8 6822.05 1513.45 2
 -4 -1 -7 15315.7 2023.32 2
 -4 -1 -6 8196.24 1438.42 2
 -4 -1 -5 5720.86 1182.37 2
 -4 -1 -4 3200.44 873.66 2
 -4 1 3 1321.93 403.766 2
 -4 -1 -3 919.746 583.125 2
 -4 1 2 1294.05 450.996 2
 -4 -1 -2 664.696 496.078 2
 -4 1 1 4723.37 810.19 2
 -4 -1 -1 4772.41 864.964 2
 -4 1 0 7882.51 1146.1 2
 -4 -1 0 6811 953.041 2
 -4 1 -1 4529.63 838.082 2
 -4 -1 1 4107.53 654.517 2
 -4 1 -2 1207.08 559.869 2
 -4 1 -3 998.857 593.77 2
 -4 1 -4 5825.06 1150.34 2
 -4 1 -5 4406.62 1030.22 2
 -4 1 -6 10352.4 1678.72 2
 -4 1 -7 16298.8 2170.55 2
 -4 1 -8 7784.26 1521.99 2
 -4 1 -9 308.416 225.659 10
 -4 -1 9 1148.08 401.684 6
 -4 -1 9 324.584 243.377 9
 -4 1 -9 27.4647 209.362 5
 -4 1 -9 354.448 469.146 2
 -4 1 -9 587.327 276.036 12
 -4 1 -9 216.107 300.932 11
 4 -1 -9 446.371 316.426 7
 4 -1 -10 9438.38 919.119 7
 -4 1 -10 11109 1973.11 2
 -4 1 -10 10013.1 1019.47 11
 -4 -1 10 9423.94 886.408 6
 -4 1 -10 10277.3 942.691 10
 -4 1 -11 4782.3 676.744 10
 -4 -1 11 3836.74 581.903 6
 -4 1 -11 4816.37 1426.14 2
 4 -1 -11 3410.6 583.564 7
 -4 1 -11 4523.66 750.71 11
 4 -1 -12 5165.61 704.525 7
 -4 1 -12 5031.5 741.752 11
 -4 1 -12 5720.97 1507.78 2
 -4 -1 12 4330.54 626.936 6
 -4 1 -12 4405.23 706.938 10
 -4 1 -13 7077.46 863.762 3
 4 -1 -13 6281.47 769.64 7
 -4 1 -13 7203.5 896.877 11
 -4 1 -13 8036.3 905.299 10
 -4 1 -14 3508.46 615.076 10
 -4 1 -14 2535.88 566.756 11
 4 -1 -14 3146.41 573.472 10
 4 -1 -14 2622.47 527.23 7
 -4 1 -14 2897.46 580.193 3
 4 -1 -15 425.155 330.313 10
 4 -1 -15 277.625 268.35 7
 -4 1 -15 465.892 298.85 11
 -4 1 -15 576.445 344.46 3
 -4 1 -15 355.995 366.55 10
 -4 1 -16 1565.42 400.019 10
 4 -1 -16 2275.37 442.258 10
 -4 1 -16 1187.51 414.262 3
 4 -1 -16 1933.82 433.675 7
 4 -1 -17 259.498 252.393 10
 -4 1 -17 233.577 291.92 3
 -4 1 -17 491.663 265.809 10
 4 -1 -17 501.675 265.506 7
 -4 1 -18 4117.5 507.338 3
 4 -1 -18 5839.8 571.246 7
 4 -1 -18 4554.52 473.299 10
 -4 1 -18 3608.92 444.887 10
 -4 1 -19 1057.4 243.17 3
 4 -1 -19 1245.44 241.346 10
 4 -1 -19 1029.25 239.469 7
 4 2 -19 1137.83 242.73 10
 4 2 -19 1304.49 247.625 7
 -4 -2 -19 1361.05 273.707 10
 4 2 -18 571.77 215.085 10
 4 2 -18 747.959 246.932 7
 -4 -2 -18 323.933 252.552 10
 -4 -2 -17 1051.13 373.989 10
 -4 2 17 1227.93 227.709 4
 4 2 -17 1361.53 381.256 10
 4 2 -17 1633.61 374.77 7
 -4 -2 -16 2817.31 546.757 10
 4 2 -16 2766.28 499.706 10
 -4 2 16 2478.85 380.612 4
 -4 -2 -16 2327.25 434.081 3
 4 2 -16 2425.34 499.065 7
 -4 2 15 3559.27 525.98 4
 -4 -2 -15 2531.85 443.732 3
 4 2 -15 4680.17 662.574 7
 -4 -2 -15 3133.39 506.333 11
 -4 -2 -15 4286.93 718.74 10
 4 2 -15 5003.01 686.396 10
 -4 2 14 2811.12 472.31 4
 -4 -2 -14 2709.5 615.784 10
 -4 -2 -14 3419.43 521.751 3
 4 2 -14 3050.99 604.945 7
 -4 -2 -14 3617.25 553.997 11
 -4 2 13 447.432 313.094 4
 -4 -2 -13 1160.7 377.14 3
 4 2 -13 548.338 434.14 7
 -4 -2 -13 424.122 373.69 11
 -4 -2 -13 746.892 388.468 10
 -4 -2 -12 5119.03 756.897 11
 -4 -2 -12 4813.53 620.049 3
 4 2 -12 5585.98 716.506 7
 -4 -2 -12 5488.16 792.88 10
 -4 2 12 5059.04 692.218 4
 -4 -2 -11 10111.2 876.985 3
 -4 -2 -11 10455.6 1035.98 11
 4 2 -11 11033.4 1011.31 7
 -4 -2 -11 10772.4 1936.71 2
 -4 2 11 10307.4 948.799 4
 -4 -2 -11 10520.8 1034.01 10
 -4 -2 -10 13571.1 2175.11 2
 4 2 -10 10925.3 997.583 7
 -4 -2 -10 11830.5 1098.73 11
 -4 2 10 11249.7 999.794 4
 -4 -2 -10 12702.4 1098.25 10
 4 2 -9 9620.45 884.666 7
 -4 -2 -9 9980.46 966.426 11
 -4 2 9 9855.44 911.777 4
 -4 -2 -9 9663.57 1688.32 2
 -4 -2 -9 8126.62 858.206 10
 -4 -2 -8 1496.56 795.422 2
 -4 -2 -8 3202.82 535.47 11
 -4 -2 -8 2914.6 519.954 10
 -4 -2 -7 26044.3 2650.86 2
 -4 -2 -6 56812.5 3846.11 2
 -4 -2 -5 78300.5 4466.96 2
 -4 -2 -4 52516.1 3381.45 2
 -4 2 3 143239 5578.25 2
 -4 -2 -3 131940 5872.34 2
 -4 2 2 128634 5283.09 2
 -4 -2 -2 120129 5292.57 2
 -4 2 1 140565 5798.43 2
 -4 -2 -1 138123 5540.23 2
 -4 2 0 5610.02 985.937 2
 -4 -2 0 5219.31 770.97 2
 -4 2 -1 128974 5889.76 2
 -4 -2 1 144890 5082.6 2
 -4 2 -2 118802 5559.02 2
 -4 2 -3 138600 6301.81 2
 -4 2 -4 56651.8 3763.15 2
 -4 2 -5 91657.8 5157.18 2
 -4 2 -6 56559.4 4040.09 2
 -4 2 -7 27817.8 2895.31 2
 -4 -2 8 2595.94 487.168 6
 -4 2 -8 2846.4 457.288 5
 -4 2 -8 3051.86 469.9 12
 -4 2 -8 2665.46 1046.11 2
 -4 -2 9 7519.9 861.603 6
 -4 -2 9 8445.52 866.919 9
 -4 2 -9 9220.95 800.161 5
 4 -2 -9 8638.01 837.127 7
 -4 2 -9 9569.26 826.165 12
 -4 2 -9 7742.83 1625.24 2
 -4 -2 10 11273.1 1006.88 6
 -4 -2 10 8287.87 967.313 9
 -4 2 -10 10710.6 1883.31 2
 -4 2 -10 11112.1 911.124 5
 4 -2 -10 10688.6 967.329 7
 4 -2 -11 10856.3 981.924 7
 -4 2 -11 9872.81 1061.96 11
 -4 2 -11 10133 1974.25 2
 -4 2 -11 10417 929.871 10
 -4 -2 11 10367 970.979 6
 4 -2 -12 5614.63 720.485 7
 -4 2 -12 5024.38 789.226 11
 -4 2 -12 6340.89 753.761 10
 -4 -2 12 7031.29 781.298 6
 -4 2 -13 870.29 328.826 10
 4 -2 -13 337.22 322.889 10
 4 -2 -13 586.879 321.889 7
 -4 -2 13 573.79 281.973 6
 -4 2 -13 969.783 403.501 11
 -4 2 -14 4026.92 586.64 10
 4 -2 -14 2916.9 549.951 10
 -4 2 -14 3169.78 633.669 3
 4 -2 -14 2873.86 560.415 7
 -4 2 -14 3240.41 563.386 11
 4 -2 -15 3614.93 557.974 10
 -4 2 -15 3817.93 652.911 3
 4 -2 -15 4481.76 642.729 7
 -4 2 -15 3507.29 563.744 11
 -4 2 -15 4359.92 609.377 10
 -4 2 -16 2364 442.766 10
 4 -2 -16 2338.83 436.501 10
 -4 2 -16 3494.02 570.885 3
 4 -2 -16 2409.31 448.704 7
 -4 2 -17 715.063 324.518 3
 4 -2 -17 1070.35 298.815 10
 4 -2 -17 1078.66 305.8 7
 -4 2 -17 596.218 250.286 10
 4 -2 -18 651.972 212.972 10
 4 -2 -18 756.981 240.946 7
 -4 2 -18 680.315 247.877 3
 -4 2 -19 1396.92 257.766 3
 4 -2 -19 1384.07 253.745 7
 4 3 -19 708.423 183.462 10
 4 3 -19 604.387 179.201 7
 -4 -3 -19 1774.79 260.25 10
 4 3 -18 4193.5 478.098 7
 4 3 -18 3968.21 429.527 10
 -4 3 18 3053.03 343.478 4
 -4 -3 -18 4373.35 521.704 10
 4 3 -17 350.478 262.067 10
 -4 3 17 252.053 177.688 4
 -4 -3 -17 191.998 260.859 10
 4 3 -17 147.542 214.973 7
 -4 -3 -16 2568.4 548.657 10
 4 3 -16 2426.46 479.645 10
 -4 3 16 2652.07 445.359 4
 4 3 -16 2801.21 521.969 7
 -4 -3 -15 8163.09 745.331 3
 -4 3 15 8756.39 812.472 4
 4 3 -15 9372.15 925.549 7
 4 3 -15 9232.78 889.503 10
 -4 -3 -15 10264.3 1024.45 10
 -4 3 14 9629.86 909.968 4
 -4 -3 -14 9762.1 826.521 3
 4 3 -14 11294.9 1054.04 7
 -4 -3 -14 10161.9 951.551 11
 -4 -3 -14 12101.9 1120.59 10
 4 3 -13 14047.8 1201.92 7
 -4 -3 -13 16435.1 1259.83 11
 -4 3 13 14708 1169 4
 -4 -3 -13 16517.3 1348.97 10
 4 3 -12 43130.8 2272.24 7
 -4 -3 -12 45626.7 2323.08 11
 -4 -3 -12 46359.6 2381.05 10
 -4 3 12 41570.9 2160.08 4
 -4 -3 -11 34922.3 3490.56 2
 4 3 -11 29232.7 1802.1 7
 -4 -3 -11 29977.2 1840.18 11
 -4 3 11 32423.9 1820.04 4
 -4 -3 -11 30994.9 1863.93 10
 -4 -3 -10 4652.08 693.29 10
 4 3 -10 6592.85 792.717 7
 -4 -3 -10 6923.32 1565.24 2
 -4 -3 -10 6044.06 800.753 11
 -4 3 10 6419.58 736.002 4
 -4 -3 -9 2706.62 560.174 10
 -4 3 9 2252.75 432.959 4
 -4 -3 -9 2455.14 1010.44 2
 -4 -3 -9 2306.89 473.507 11
 4 3 -9 2429.78 475.218 7
 -4 -3 -8 61759 4356.12 2
 4 3 -8 58213.2 2599.79 7
 -4 -3 -8 57290.5 2700.91 11
 -4 -3 -8 59917.5 2653.69 10
 -4 3 8 65661.1 2680.64 4
 -4 -3 -7 50145.1 3770.56 2
 -4 -3 -7 49844 2360.64 11
 -4 -3 -7 48707.6 2262.84 10
 -4 -3 -6 8643.39 1453.96 2
 -4 -3 -5 3945.69 935.948 2
 -4 3 4 7832.53 1186.08 2
 -4 -3 -4 6802.31 1211.36 2
 -4 3 3 40145.7 2732.3 2
 -4 -3 -3 33473 2558.01 2
 -4 3 2 120517 5472.07 2
 -4 -3 -2 116035 5181.26 2
 -4 3 1 1698.81 691.481 2
 -4 -3 -1 1561.39 508.382 2
 -4 3 0 1730.77 726.168 2
 -4 -3 0 2017.24 489.22 2
 -4 3 -1 2363.1 752.222 2
 -4 3 -2 118213 5770.01 2
 -4 3 -3 37295.4 3026.99 2
 -4 3 -4 7103.8 1400.61 2
 -4 3 -5 4507.7 1224.55 2
 -4 3 -6 6361.34 1434.01 2
 -4 -3 7 51219.1 2391.33 6
 -4 3 -7 50370.8 2113.1 12
 -4 3 -7 54782 4166.99 2
 -4 -3 8 61736.8 2740.43 6
 -4 3 -8 62637.1 4682.7 2
 -4 -3 8 57762.1 2665.23 9
 -4 3 -8 61859.9 2480.62 5
 -4 3 -8 58169.6 2670.96 4
 4 -3 -8 61323.6 2587.26 7
 -4 3 -8 64919.7 2492.17 12
 -4 -3 9 2946.96 578.082 6
 -4 -3 9 2215.09 520.335 9
 -4 3 -9 1811.27 453.98 5
 -4 3 -9 1646.75 466.067 4
 -4 3 -9 3150.12 486.799 12
 4 -3 -9 1765.67 414.244 7
 -4 3 -9 1806.92 857.12 2
 -4 -3 10 6175.37 773.617 6
 -4 -3 10 5655.7 789.667 9
 -4 3 -10 5759.9 685.552 5
 4 -3 -10 6071.04 726.64 7
 -4 3 -10 5096.84 648.115 12
 -4 3 -10 7023.96 1675.22 2
 -4 -3 11 29942.9 1776.4 6
 -4 -3 11 28254.1 1834.36 9
 4 -3 -11 29366.2 1714.91 7
 -4 3 -11 27732.4 3360.37 2
 -4 -3 12 47470.3 2276.67 6
 4 -3 -12 42908.5 2192.06 7
 -4 3 -12 45093.9 2425.73 11
 4 -3 -12 40485.1 2054.62 10
 4 -3 -13 15270 1206.21 7
 4 -3 -13 15538.6 1115.09 10
 -4 3 -13 13824.8 1251.97 11
 -4 -3 13 14820.3 1149.86 6
 -4 3 -14 10227.8 1033.89 3
 4 -3 -14 9853.25 949.785 7
 -4 3 -14 12386.3 1099.8 11
 4 -3 -14 10394 882.147 10
 -4 -3 14 9697.87 842.858 6
 -4 3 -15 8554.01 877.478 3
 4 -3 -15 10267.6 908.224 7
 -4 3 -15 7561.14 791.301 11
 4 -3 -15 8192.11 751.613 10
 4 -3 -16 2498.06 390.558 10
 -4 3 -16 2642.01 534.316 3
 4 -3 -16 2624.31 452.455 7
 4 -3 -17 114.214 183.016 10
 -4 3 -17 854.824 298.417 3
 4 -3 -17 498.455 266.167 7
 -4 3 -18 3821.09 452.571 3
 4 -3 -18 4211.82 470.266 7
 4 -3 -18 3559.1 340.274 10
 4 -3 -19 1181.43 199.807 7
 -4 3 -19 1094.82 219.321 3
 -4 4 18 3915.84 374.382 4
 4 4 -18 4764.89 473.427 7
 4 4 -18 5113.79 435.602 10
 -4 -4 -18 4589.4 491.454 10
 4 4 -17 254.111 207.818 10
 -4 4 17 -99.187 154.834 4
 4 4 -17 223.453 230.236 7
 -4 -4 -17 56.4843 256.008 10
 4 4 -16 15278.5 1025.78 10
 4 4 -16 14491.3 1071.6 7
 -4 4 16 12313.1 910.215 4
 -4 -4 -16 14885 1131.23 10
 -4 -4 -15 -267.132 383.643 10
 4 4 -15 61.9891 274.358 10
 -4 4 15 675.073 321.989 4
 4 4 -15 339.915 321.241 7
 4 4 -14 28465 1714.37 7
 -4 -4 -14 26388.5 1571.77 11
 -4 4 14 25542.9 1548.96 4
 -4 -4 -14 26534.5 1702.91 10
 -4 -4 -13 3561.9 687.357 10
 -4 4 13 3146.11 571.914 4
 -4 -4 -13 4714.79 692.358 11
 4 4 -13 2675.39 574.077 7
 -4 -4 -12 46407.3 2376.61 11
 4 4 -12 49404.5 2472.32 7
 -4 4 12 45109.8 2312.1 4
 -4 -4 -12 50250.1 2491.78 10
 4 4 -11 8450.89 928.681 7
 -4 4 11 7506.66 877.283 4
 -4 -4 -11 8428.25 957.405 11
 -4 -4 -11 9581.01 985.653 10
 -4 -4 -10 5034.1 1280.97 2
 4 4 -10 6657.87 812.366 7
 -4 -4 -10 5746.45 788.304 11
 -4 4 10 5388.51 704.524 4
 -4 -4 -10 5466.06 759.85 10
 -4 -4 -9 6209.81 786.306 10
 -4 -4 -9 5091.06 724.641 11
 4 4 -9 5281.7 743.952 7
 -4 -4 -9 3739.99 1138.15 2
 -4 4 9 5076.88 714.496 4
 -4 -4 -8 38705.7 2084.64 11
 -4 4 8 36968.7 1957.03 4
 -4 -4 -8 34494.2 3239.78 2
 -4 -4 -8 37250.7 2002.06 10
 -4 -4 -7 35760.2 1918.73 10
 -4 -4 -7 35562.9 3156.34 2
 -4 4 7 35887.5 1879.09 4
 -4 -4 -7 36460.8 1981.31 11
 -4 -4 -6 21753.3 1366.04 10
 -4 -4 -6 18813.4 1340.22 11
 -4 -4 -6 19362.2 2249.59 2
 -4 -4 -5 22062.4 2279.23 2
 -4 4 5 27128.4 2374.98 2
 -4 4 4 -310.197 448.345 2
 -4 -4 -4 448.308 454.023 2
 -4 4 3 55033.4 3645.2 2
 -4 -4 -3 55898.6 3468.89 2
 -4 -4 -2 15037.8 1627.98 2
 -4 4 2 18527 2040.57 2
 -4 4 1 34106.7 2825.51 2
 -4 -4 -1 31035.1 2248.88 2
 -4 4 0 64765.4 4120.01 2
 -4 4 -1 30644.8 2774.03 2
 4 -4 -1 30373.2 2256.81 1
 -4 4 -2 15828.2 2059.3 2
 -4 4 -3 58376.1 4134.01 2
 -4 4 -4 -381.855 617.766 2
 -4 4 -5 26428.8 2827.2 2
 -4 -4 6 21972.9 1454.03 6
 -4 4 -6 19862.5 2460.95 2
 -4 4 -6 21667.8 1232.14 5
 -4 4 -6 20623 1197.73 12
 -4 -4 7 35097.7 1927.89 6
 -4 -4 7 34776.7 1905.28 9
 -4 4 -7 34434.4 3400.06 2
 -4 4 -7 37256.2 1733.71 5
 -4 4 -7 35822.4 1914.41 4
 4 -4 -7 34196.1 1791.85 7
 -4 4 -7 36536.7 1703.64 12
 -4 -4 8 36703.4 2009.18 6
 -4 4 -8 33919 3486.99 2
 -4 4 -8 38817.9 1816.39 5
 -4 4 -8 36246.5 1990.39 4
 4 -4 -8 37087.8 1903.7 7
 -4 4 -8 36055.7 1748.13 12
 -4 -4 8 35684.5 1976.99 9
 -4 -4 9 4812 730.328 6
 -4 -4 9 5567.65 760.191 9
 -4 4 -9 5821.69 674.407 5
 -4 4 -9 5212.63 734.474 4
 4 -4 -9 6191.67 722.442 7
 -4 4 -9 5678.04 646.447 12
 -4 4 -9 4924.73 1478.69 2
 -4 -4 10 5873.04 781.541 6
 -4 4 -10 4959.61 644.109 5
 -4 -4 10 5601.35 801.859 9
 4 -4 -10 4522.33 631.975 7
 -4 4 -10 4689.34 1365.58 2
 -4 -4 11 10136.6 1048.96 6
 -4 -4 11 8912.83 1025.86 9
 4 -4 -11 9099.2 906.08 7
 -4 -4 12 42506.6 2243.95 6
 -4 -4 12 47912.8 2494.04 9
 4 -4 -12 44886.8 2247.92 7
 -4 -4 13 3835.7 616.179 6
 -4 4 -13 4920.83 724.908 11
 4 -4 -13 3105.51 553.652 7
 4 -4 -14 24827.9 1544.35 7
 -4 4 -14 25337.2 1623.97 11
 -4 -4 14 26890.4 1534.65 6
 4 -4 -15 153.754 270.747 7
 -4 4 -15 475.507 375.33 3
 -4 4 -15 424.174 253.745 11
 -4 4 -16 14424.2 1056.44 3
 4 -4 -16 15783.2 1062.85 7
 -4 4 -17 329.344 242.283 3
 4 -4 -17 6.09329 187.395 7
 -4 4 -18 4716.43 561.233 3
 4 -4 -18 5005.12 469.516 7
 4 5 -18 202.052 131.903 10
 4 5 -18 276.114 149.766 7
 -4 -5 -18 420.928 195.971 10
 -4 5 17 13090.7 803.244 4
 4 5 -17 12730.3 860.989 7
 4 5 -17 13605.9 790.889 10
 -4 -5 -17 11467.6 843.228 10
 -4 5 16 1685.4 361.355 4
 4 5 -16 2251.23 385.276 10
 4 5 -16 1604.44 358.921 7
 -4 -5 -16 1747.76 409.582 10
 4 5 -15 2586.22 468.413 10
 -4 5 15 2308.36 408.077 4
 4 5 -15 2269.76 464.361 7
 -4 -5 -15 2449.47 516.887 10
 -4 5 14 3130.03 535.247 4
 4 5 -14 3256.67 593.23 7
 -4 -5 -14 3620.31 556.392 11
 -4 -5 -14 3556.18 597.252 10
 -4 -5 -13 8088.08 876.36 11
 4 5 -13 7049.17 843.515 7
 -4 5 13 8030.94 857.691 4
 -4 -5 -13 7738.38 871.969 10
 4 5 -12 15452.3 1308.56 7
 -4 5 12 15553.7 1226.77 4
 -4 -5 -12 14855.5 1231.72 11
 -4 -5 -12 17145.5 1336.91 10
 -4 5 11 1573.99 450.426 4
 4 5 -11 2443.47 543.643 7
 -4 -5 -11 2656.52 617.797 11
 -4 -5 -11 2102.38 515.003 10
 -4 -5 -10 2812.28 1277.91 2
 4 5 -10 7601.94 907.789 7
 -4 -5 -10 7976.69 929.607 11
 -4 5 10 6769.38 829.211 4
 -4 -5 -10 7255.71 888.51 10
 -4 -5 -9 12168.3 2083.82 2
 -4 -5 -9 13242.6 1174.77 11
 -4 5 9 11911 1077.84 4
 -4 -5 -9 12742.4 1141.19 10
 -4 -5 -8 7457.59 899.31 11
 -4 -5 -8 8365.54 1632 2
 -4 5 8 7767.48 848.687 4
 -4 -5 -8 6161.44 798.543 10
 -4 -5 -7 48846.4 2353.45 10
 -4 5 7 48230.6 2278.15 4
 -4 -5 -7 45392.1 2345.28 11
 -4 -5 -7 43501.4 3690.26 2
 -4 5 6 1109.22 375.447 4
 -4 5 6 1362.7 333.769 6
 -4 -5 -6 1604.79 816.937 2
 -4 -5 -6 1488.63 409.655 11
 -4 -5 -6 1743.86 446.688 10
 -4 5 5 4090.16 543.159 4
 -4 5 5 3003.88 1028.83 2
 -4 -5 -5 2838.89 803.875 2
 -4 -5 -5 3755.67 618.614 11
 -4 -5 -5 4825.26 609.92 10
 -4 5 4 8907.4 1604.41 2
 -4 -5 -4 5875.38 1150.56 2
 -4 5 3 20364 2340.65 2
 -4 -5 -3 18202.8 1979.54 2
 -4 5 2 46262 3704.56 2
 -4 -5 -2 54567.8 3370.86 2
 -4 5 1 27093.2 2691.47 2
 4 -5 1 25244 2373.57 1
 -4 -5 -1 26250.3 2205.18 2
 4 -5 0 4833.11 994.079 1
 -4 5 0 5013.48 1242.18 2
 -4 5 -1 27863.3 2885.62 2
 4 -5 -1 26979.7 2333.38 1
 -4 5 -2 52453.6 4037.76 2
 -4 5 -3 21208 2530.16 2
 -4 5 -4 5025.86 1399.82 2
 -4 -5 5 3218.34 563.337 6
 -4 5 -5 4032.25 531.698 5
 -4 5 -5 4315.57 503.957 12
 -4 -5 5 3208.73 551.721 9
 -4 5 -5 2749.08 1045.63 2
 -4 5 -5 3622.49 499.966 6
 -4 5 -5 2849.13 538.056 4
 -4 -5 6 1193.71 414.911 6
 -4 -5 6 2108.1 495.998 9
 -4 5 -6 2053.11 417.388 5
 -4 5 -6 512.849 888.21 2
 -4 5 -6 1392.7 314.542 12
 4 -5 -6 1474.71 346.476 7
 -4 5 -6 1733.78 436.294 4
 -4 -5 7 50029.4 2465.03 6
 -4 -5 7 48372.9 2402.19 9
 -4 5 -7 51478.2 4355.68 2
 -4 5 -7 48931.8 2153.82 5
 -4 5 -7 47949.4 2392.87 4
 4 -5 -7 49947.6 2284.29 7
 -4 5 -7 48388.4 2101.72 12
 -4 5 -8 5550.26 1492.32 2
 -4 -5 8 6774.68 850.433 6
 -4 5 -8 7174.8 721.689 12
 -4 -5 8 6714.36 839.023 9
 -4 5 -8 6495.14 718.047 5
 -4 5 -8 6434.85 815.812 4
 4 -5 -8 8644.2 868.516 7
 -4 -5 9 12450.8 1134.62 6
 -4 -5 9 10606.9 1098.85 9
 -4 5 -9 12335 990.015 5
 -4 5 -9 13098 1168.45 4
 4 -5 -9 10943.4 998.678 7
 -4 5 -9 12845.6 989.582 12
 -4 5 -9 11675.3 2241.85 2
 -4 -5 10 6615.31 821.258 6
 -4 -5 10 7198.11 916.544 9
 -4 5 -10 6566.21 754.431 5
 4 -5 -10 6416.62 771.969 7
 -4 5 -10 8942.16 1928.31 2
 4 -5 -11 1873.82 476.66 7
 -4 -5 11 2271.75 534.865 6
 -4 -5 11 2927.34 631.42 9
 -4 -5 12 13827.8 1195.54 6
 -4 -5 12 16371.2 1359.97 9
 4 -5 -12 16031.6 1222.98 7
 -4 -5 13 8132.14 859.446 6
 -4 -5 13 6684.12 919.363 9
 4 -5 -13 7291.83 810.334 7
 -4 5 -13 7992.89 931.844 11
 -4 -5 14 2854.61 507.67 6
 4 -5 -14 3142.72 557.664 7
 -4 5 -14 3678.53 584.764 11
 -4 5 -15 2507.6 449.154 11
 -4 -5 15 2069.93 370.972 6
 4 -5 -15 2830.39 487.39 7
 -4 5 -15 1544.71 480.343 3
 -4 5 -16 2069.23 436.613 3
 4 -5 -16 1221.32 323.282 7
 -4 5 -17 12898.7 844.477 3
 4 -5 -17 13015.2 842.863 7
 -4 5 -18 153.893 154.225 3
 4 -5 -18 144.868 149.571 7
 4 6 -17 1951.02 258.403 10
 4 6 -17 2268.58 326.763 7
 -4 6 17 2584.28 323.717 4
 -4 -6 -17 2325.95 333.603 10
 -4 6 16 4304.07 486.053 4
 4 6 -16 4110.66 520.201 7
 -4 -6 -16 3871.98 492.867 10
 4 6 -16 4239.02 444.34 10
 4 6 -15 4377.54 520.125 10
 4 6 -15 3849.62 572.069 7
 -4 6 15 3964.88 520.95 4
 -4 -6 -15 3614.95 532.567 10
 4 6 -14 8963.4 924.011 7
 -4 -6 -14 7412.84 757.169 11
 -4 6 14 8385.29 810.277 4
 4 6 -14 9681.74 820.2 10
 -4 -6 -14 8257.44 849.018 10
 4 6 -13 7657 865.171 7
 -4 -6 -13 6090.71 743.037 11
 -4 -6 -13 6952.23 820.552 10
 -4 6 13 5951.55 741.049 4
 4 6 -12 14003.4 1218.91 7
 -4 -6 -12 13852.5 1162.83 11
 -4 6 12 12453.7 1074.41 4
 -4 -6 -12 12774.3 1134.68 10
 -4 6 11 4136.25 667.146 4
 -4 -6 -11 4296.42 691.05 11
 4 6 -11 3926.67 713.221 7
 -4 -6 -11 4578.63 703.475 10
 -4 6 10 2332.22 546.789 4
 -4 -6 -10 4309.04 580.574 9
 -4 -6 -10 3263.16 616.573 11
 4 6 -10 2519.33 616.999 7
 -4 -6 -10 3526.44 654.248 10
 -4 6 9 5567.56 756.996 4
 -4 -6 -9 5751.72 795.282 10
 -4 -6 -9 5531.87 673.673 9
 -4 -6 -9 3760.37 1401.53 2
 -4 -6 -9 4788.13 764.044 11
 -4 -6 -8 19594.7 1286.53 9
 -4 -6 -8 23037.5 2832.98 2
 -4 -6 -8 20130.9 1494.82 11
 -4 6 8 18736.6 1381.3 4
 -4 -6 -8 20463.1 1491.9 10
 -4 -6 -7 7736.05 750.623 9
 -4 -6 -7 7690.11 1571.69 2
 -4 6 7 6883.82 804.498 4
 -4 -6 -7 7059.24 858.554 10
 -4 -6 -7 5989.69 812.853 11
 -4 -6 -6 20328.7 1382.87 10
 -4 -6 -6 19292.1 2434.87 2
 -4 -6 -6 20016.6 1475.79 11
 -4 -6 -6 19592.2 1251.42 9
 -4 6 6 19263.2 1142.32 6
 -4 6 6 17195.1 1274.58 4
 -4 -6 -5 28375.8 1565.21 9
 -4 6 5 32221.9 1523.67 6
 -4 -6 -5 30317.6 1734.79 10
 -4 -6 -5 24838.4 2652.13 2
 -4 -6 -5 27960.7 1778.17 11
 -4 6 5 27550.2 1632.46 4
 -4 6 4 375.838 293.917 4
 -4 6 4 561.969 249.15 6
 -4 -6 -4 345.049 284.999 10
 -4 -6 -4 -79.6899 190.936 9
 -4 6 4 -434.81 591.245 2
 -4 -6 -4 -9.68592 188.893 2
 -4 -6 -4 401.286 395.116 11
 4 -6 4 1846.54 911.828 1
 -4 6 3 2600.39 457.842 4
 -4 6 3 2442.8 408.916 6
 -4 6 3 3215.67 1000.5 2
 -4 -6 -3 2216.42 487.543 10
 4 -6 3 198.459 553.151 1
 -4 -6 -3 2377 527.411 11
 -4 -6 -2 76067.5 3015.14 10
 -4 6 2 70322.2 4936.15 2
 4 -6 2 64104.4 4378.02 1
 -4 6 2 68343.8 2866.67 4
 -4 6 2 70023.9 2705.9 6
 -4 -6 -2 73375 3067.49 11
 -4 6 1 1223.49 408.305 4
 -4 6 1 1192.01 298.032 6
 4 -6 1 792.533 619.329 1
 -4 6 1 634.767 613.427 2
 -4 6 0 743.631 341.788 4
 -4 6 0 1553.1 365.042 6
 -4 6 0 1403.96 678.63 2
 4 -6 0 1212.01 554.696 1
 -4 6 -1 686.477 242.097 6
 -4 6 -1 298.945 745.731 2
 -4 6 -1 474.62 288.519 4
 -4 6 -2 65852.8 4922.98 2
 -4 6 -2 71264 2772.16 6
 -4 6 -2 71708.1 2915.11 4
 -4 6 -3 1862.66 391.288 6
 -4 6 -3 1453.05 827.37 2
 -4 -6 3 2164.2 491.368 6
 -4 -6 3 1024.64 406.758 9
 -4 6 -3 1563.2 446.928 4
 -4 6 -4 -92.884 586.118 2
 -4 -6 4 555.103 358.438 6
 -4 -6 4 521.191 321.845 9
 -4 6 -4 345.168 254.984 5
 -4 6 -4 788.631 358.585 4
 -4 6 -4 344.775 225.69 6
 -4 -6 5 29287.2 1798.06 6
 -4 -6 5 26973.6 1676.13 9
 -4 6 -5 29323.4 3240.5 2
 -4 6 -5 28417.2 1518.59 5
 4 -6 -5 30407.5 1647.45 7
 -4 6 -5 27363 1674.75 4
 -4 6 -5 27807.2 1452.88 12
 -4 -6 6 20294.4 1489.22 6
 -4 -6 6 20099.1 1433.44 9
 -4 6 -6 20774.2 1205.85 12
 -4 6 -6 23617.6 2891.29 2
 -4 6 -6 19266.8 1228.42 5
 -4 6 -6 20686.4 1421.38 4
 4 -6 -6 18448.8 1291.57 7
 -4 -6 7 6939.15 874.896 6
 -4 6 -7 8925.9 1975.17 2
 -4 -6 7 6304.83 824.835 9
 -4 6 -7 7399.12 696.215 12
 -4 6 -7 7280.19 736.184 5
 -4 6 -7 6785.8 810.597 4
 4 -6 -7 7028.18 783.697 7
 -4 -6 8 19950.9 1491.66 6
 -4 6 -8 21587.4 3064.97 2
 -4 -6 8 22196 1551.76 9
 -4 6 -8 18825.8 1235.55 5
 -4 6 -8 19355.3 1437.68 4
 4 -6 -8 17882.9 1330.74 7
 -4 6 -8 19822.5 1213.32 12
 -4 6 -9 3155.49 1337.9 2
 -4 -6 9 6265.89 834.313 6
 -4 -6 9 6217.37 847.9 9
 -4 6 -9 5764.71 682.532 5
 -4 6 -9 5773.83 787.513 4
 4 -6 -9 5974.78 763.501 7
 -4 6 -9 4919.23 625.214 12
 -4 -6 10 3434.02 637.234 6
 -4 -6 10 3075.35 642.651 9
 -4 6 -10 2306.72 488.749 5
 4 -6 -10 2948.27 554.157 7
 -4 -6 11 4188.09 661.487 6
 -4 -6 11 2923.52 666.392 9
 4 -6 -11 3219.01 584.465 7
 -4 -6 12 13931.9 1192.19 6
 -4 -6 12 13835.1 1267.69 9
 4 -6 -12 14092 1137.65 7
 -4 -6 13 6265.54 776.848 6
 -4 -6 13 6691.13 870.377 9
 4 -6 -13 6723.19 747.861 7
 -4 -6 14 9739.86 856.755 6
 4 -6 -14 9027.02 843.633 7
 -4 6 -14 7537.3 834.075 11
 -4 6 -15 4189.45 587.098 3
 4 -6 -15 4334.11 546.651 7
 -4 6 -15 4990.64 552.211 11
 -4 -6 15 3559.32 467.566 6
 -4 6 -16 3813.35 514.187 3
 4 -6 -16 4347.68 495.008 7
 -4 6 -17 2402.22 341.53 3
 4 -6 -17 2777.27 350.967 7
 4 7 -17 1567.61 225.043 7
 -4 7 16 521.722 203.76 4
 4 7 -16 532.374 231.01 7
 -4 -7 -16 311.692 215.732 10
 -4 -7 -15 15563.4 1015.28 10
 -4 7 15 21112.6 1143.55 4
 4 7 -15 19685.4 1161.87 7
 4 7 -15 19684.5 982.414 10
 -4 7 14 -142.431 273.588 4
 4 7 -14 290.75 217.22 10
 4 7 -14 84.5427 235.527 7
 -4 -7 -14 -17.4955 163.554 11
 -4 -7 -14 -7.3672 260.443 10
 -4 7 13 155.581 295.443 4
 -4 -7 -13 279.702 287.173 11
 4 7 -13 -12.5917 282.391 7
 -4 -7 -13 810.668 410.605 10
 -4 -7 -12 5963.05 656.9 9
 4 7 -12 7021.76 844.909 7
 -4 -7 -12 6520.08 780.332 11
 -4 7 12 6561.82 771.95 4
 -4 -7 -12 6661.19 772.335 10
 -4 -7 -11 35676.3 1810.09 9
 4 7 -11 38623.8 2141.54 7
 -4 -7 -11 34941.9 1990.22 11
 -4 7 11 34027.4 1929 4
 -4 -7 -11 39403.4 2063.62 10
 -4 -7 -10 11963.4 987.754 9
 -4 -7 -10 13309.8 1201.54 11
 -4 7 10 12676.6 1129.35 4
 -4 -7 -10 12196 1135.84 10
 -4 -7 -9 5706.34 685.119 9
 -4 7 9 4534.04 678.962 4
 -4 -7 -9 5584.69 814.077 11
 -4 -7 -9 5478.9 760.21 10
 -4 -7 -8 25080.5 1505.5 9
 -4 -7 -8 25238.4 1736.07 11
 -4 7 8 24198.2 1598.38 4
 -4 -7 -8 26133.2 1675.05 10
 -4 -7 -7 77892.4 3467.7 11
 -4 -7 -7 76193.5 3140.49 9
 4 -7 7 89287.8 5977.04 1
 -4 7 7 81283.9 3346.03 4
 -4 -7 -7 81696.5 3385.95 10
 -4 -7 -6 46290.7 2236.11 9
 4 -7 6 50096 4381.99 1
 -4 -7 -6 48587 2536.37 11
 -4 7 6 51433.3 2427.34 4
 -4 -7 -6 51703.8 2453.21 10
 -4 -7 -5 42870.1 2207.55 10
 -4 -7 -5 39601.2 2047.81 9
 4 -7 5 46733.2 4102.73 1
 -4 -7 -5 42397.7 2347.69 11
 -4 7 5 46913.4 2024.45 6
 -4 7 5 44013 2200.42 4
 -4 -7 -4 21400.6 1421.63 9
 -4 7 4 19932 2758.21 2
 4 -7 4 26878.5 3036.88 1
 -4 7 4 23681.8 1507.35 4
 -4 -7 -4 25384.9 1694.21 11
 -4 7 4 25552.8 1397.74 6
 -4 -7 -4 25700.4 1574.75 10
 4 -7 3 44935.2 3867.5 1
 -4 -7 -3 43220 2158.91 9
 -4 7 3 49225.7 4315.17 2
 -4 -7 -3 46620.1 2420.07 11
 -4 7 3 45888.8 2236.98 4
 -4 7 3 48846.1 2103.65 6
 -4 -7 -3 47899.5 2297.39 10
 -4 -7 -2 42816.4 2119.82 9
 -4 7 2 47180.7 4187.88 2
 4 -7 2 44032.7 3703.41 1
 -4 7 2 43702.6 2159.58 4
 -4 -7 -2 44513.2 2320.47 11
 -4 -7 -2 43342.3 2180.05 10
 -4 7 2 44435.6 2012.24 6
 -4 -7 -1 127740 4655.12 11
 -4 -7 -1 121872 4387.75 9
 -4 7 1 121105 7183.88 2
 -4 7 1 119648 4393.99 4
 -4 7 1 120519 4207.93 6
 -4 -7 -1 124382 4475.89 10
 4 -7 1 119282 6506.56 1
 -4 7 0 2483.64 474.556 6
 -4 -7 0 1841.89 451.503 9
 -4 7 0 1916.54 1032.54 2
 4 -7 0 1496.57 809.364 1
 -4 -7 0 2085.33 452.801 11
 -4 -7 0 1156.24 453.19 10
 -4 7 0 1539.87 461.266 4
 -4 -7 1 128651 4631.44 6
 -4 -7 1 126049 4579.03 9
 -4 7 -1 122866 7313.21 2
 -4 7 -1 120679 4506.62 4
 -4 -7 1 124852 4652.8 11
 -4 7 -1 131078 4376.36 6
 -4 -7 1 134126 4672.9 10
 -4 -7 2 46543.2 2344.03 6
 -4 -7 2 46854.5 2277.38 9
 -4 7 -2 43152.1 4030.95 2
 -4 7 -2 47607.7 2273.72 4
 -4 7 -2 43170.8 2040.75 6
 -4 -7 3 47209.9 2374.63 6
 -4 -7 3 43700.5 2235.2 9
 -4 7 -3 38981.5 3877.82 2
 -4 7 -3 41624.6 1963.64 5
 -4 7 -3 44218.9 2213.34 4
 -4 -7 4 25394.6 1679.22 6
 -4 -7 4 22726.7 1555.19 9
 -4 7 -4 22523 2921.84 2
 -4 7 -4 24101.3 1377.23 5
 4 -7 -4 22742.1 1447.29 7
 -4 7 -4 23210.6 1531.23 4
 -4 7 -4 23965 1308.03 12
 -4 -7 5 47888.8 2418.15 6
 -4 -7 5 42751.8 2264.83 9
 -4 7 -5 45763.2 4262.25 2
 -4 7 -5 42165.3 1977.72 5
 4 -7 -5 42973.1 2131.94 7
 -4 7 -5 41981.7 2184.37 4
 -4 7 -5 41595.5 1889.12 12
 -4 -7 6 56272.6 2639.84 6
 -4 -7 6 55396.1 2620.31 9
 -4 7 -6 48623.7 4500.74 2
 -4 7 -6 48507.4 2196.6 5
 4 -7 -6 48238.1 2376.01 7
 -4 7 -6 50061.3 2454.03 4
 -4 7 -6 48788.1 2105.49 12
 -4 -7 7 79061.8 3389.43 6
 -4 -7 7 81049.2 3425.45 9
 -4 7 -7 84010.3 6058.64 2
 -4 7 -7 74265.2 2987.16 5
 -4 7 -7 77065.2 3317.09 4
 4 -7 -7 76757 3215.25 7
 -4 7 -7 77984.4 2925.96 12
 -4 -7 8 24339.8 1640.43 6
 -4 -7 8 24145.6 1677.68 9
 -4 7 -8 24541.5 1433.38 5
 -4 7 -8 25145.9 1652.62 4
 4 -7 -8 22549.5 1532.3 7
 -4 7 -8 24632.4 1362.54 12
 -4 -7 9 5428.99 787.868 6
 -4 -7 9 5499.6 835.937 9
 -4 7 -9 4530.07 637.502 5
 -4 7 -9 4898.87 749.312 4
 4 -7 -9 6172.08 770.83 7
 -4 -7 10 13906.3 1196.57 6
 -4 -7 10 13781.2 1265.77 9
 -4 7 -10 12712.5 1022.84 5
 4 -7 -10 14663.3 1155.88 7
 -4 -7 11 35237.7 1985.16 6
 -4 -7 11 36625.2 2104.52 9
 4 -7 -11 35490.7 1926.09 7
 -4 -7 12 5716.26 755.454 6
 -4 -7 12 6531.38 861.917 9
 4 -7 -12 6015.21 750.605 7
 -4 -7 13 570.496 299.192 6
 -4 -7 13 523.795 386.237 9
 4 -7 -13 579.338 340.7 7
 -4 -7 14 225.774 171.89 6
 4 -7 -14 90.4665 239.451 7
 -4 7 -14 -41.1996 255.533 11
 -4 7 -15 19875.4 1145.43 3
 4 -7 -15 19853.9 1120.12 7
 -4 7 -15 18239.1 1036.41 11
 -4 -7 15 17858 1011.48 6
 4 -7 -16 409.968 195.629 7
 -4 7 -16 468.877 199.489 3
 -4 7 -17 2183.23 277.867 3
 4 -7 -17 2047.02 270.798 7
 -4 8 16 2695.83 303.821 4
 4 8 -16 1893.96 268.185 7
 4 8 -15 3042.96 410.612 7
 -4 8 15 2629.69 369.332 4
 -4 -8 -15 1867.05 289.631 10
 -4 8 14 1204.33 314.304 4
 4 8 -14 1645.69 355.382 7
 -4 -8 -14 1020.23 274.947 10
 -4 8 13 1526.22 368.457 4
 -4 -8 -13 1091.6 282.864 9
 4 8 -13 1490.9 395.609 7
 -4 -8 -13 968.175 306.741 10
 -4 8 12 2685.56 527.723 4
 -4 -8 -12 4409.49 537.762 9
 4 8 -12 4261.57 650.245 7
 -4 -8 -12 2387.46 518.476 11
 -4 -8 -12 3237.97 502.863 10
 -4 -8 -11 5962.98 665.721 9
 4 8 -11 6597.89 847.417 7
 -4 -8 -11 5349.62 740.879 11
 -4 8 11 6289.86 751.169 4
 -4 -8 -11 5960.07 740.504 10
 -4 8 10 3327.77 588.078 4
 -4 -8 -10 2902.98 501.627 9
 -4 -8 -10 2311.93 553.756 11
 -4 -8 -10 3081.96 585.879 10
 -4 -8 -9 7806.88 823.501 9
 -4 8 9 9312.17 945.337 4
 -4 -8 -9 7920.15 949.581 11
 -4 -8 -9 8290.03 885.727 10
 -4 -8 -8 9341.93 907.025 9
 -4 -8 -8 9719.94 1072.76 11
 -4 -8 -8 9661.94 973.258 10
 -4 8 8 9802.74 986.318 4
 -4 -8 -7 8577.35 884.834 9
 -4 -8 -7 9430.21 952.808 10
 -4 -8 -7 9211.69 1051.62 11
 -4 8 7 9867.86 989.681 4
 -4 -8 -6 5739.86 755.644 9
 -4 8 6 4865.1 690.651 4
 -4 -8 -6 5077.85 829.018 11
 -4 -8 -6 5437.67 746.987 10
 -4 -8 -5 52202.6 2695.52 11
 -4 -8 -5 50114.8 2408.14 9
 4 -8 5 54950.8 4633.75 1
 -4 8 5 42007.4 4253.39 2
 -4 8 5 47716.2 2403.45 4
 -4 8 5 52079 2195.81 6
 -4 -8 -5 55834.9 2543.24 10
 -4 8 4 41292 1894.19 6
 -4 -8 -4 37341.1 2021.24 9
 -4 8 4 39603.6 4060.66 2
 -4 8 4 37873.6 2053.29 4
 -4 -8 -4 41280.5 2318.21 11
 4 -8 4 37782.2 3765.44 1
 -4 -8 -4 41388.7 2111.91 10
 -4 -8 -3 11203 1000.87 9
 -4 8 3 9556.45 2068.63 2
 4 -8 3 10896.5 2096.14 1
 -4 8 3 10532 995.674 4
 -4 8 3 11083.8 901.666 6
 -4 -8 -3 11003.3 1163.5 11
 -4 -8 -3 11462.7 1041.17 10
 -4 -8 -2 42859.9 2161.71 9
 -4 -8 -2 41499.7 2142.02 10
 -4 8 2 38368.7 4024.13 2
 -4 8 2 40452.8 2118.2 4
 -4 -8 -2 43994.3 2372.65 11
 -4 8 2 41379.3 1956.75 6
 4 -8 2 47937.1 4071.4 1
 -4 -8 -1 10353.1 980.629 9
 -4 8 1 9821.72 1966.05 2
 -4 8 1 10657.2 989.157 4
 -4 -8 -1 10747 1012.27 10
 4 -8 1 13439 2070.24 1
 -4 -8 -1 9644.88 1082.67 11
 -4 -8 0 7422.81 836.382 9
 -4 8 0 5905.65 1669.45 2
 -4 8 0 8659.91 905.356 4
 -4 -8 0 6374.01 891.736 11
 -4 -8 1 10047.8 945.648 6
 -4 -8 1 10860.4 1037.78 9
 -4 8 -1 14665.8 2364.59 2
 -4 8 -1 9974.32 968.61 4
 -4 -8 2 42311.7 2229.12 6
 -4 -8 2 41711.9 2210.59 9
 -4 8 -2 48929.5 4422.17 2
 -4 8 -2 41528.1 1961.53 5
 -4 8 -2 43109.7 2186.15 4
 -4 -8 3 10918 1076.9 6
 -4 -8 3 9752.43 1029.72 9
 -4 8 -3 11142.1 2210.56 2
 -4 8 -3 10704.2 902.003 5
 4 -8 -3 11610.3 1037.67 7
 -4 8 -3 10386.2 992.911 4
 -4 8 -3 11278.7 846.553 12
 -4 -8 4 43951.8 2261.06 6
 -4 -8 4 40157.6 2165.5 9
 -4 8 -4 38925.3 4005.99 2
 -4 8 -4 37193.3 1843.07 5
 4 -8 -4 39019.7 2057.65 7
 -4 8 -4 35933 2025.22 4
 -4 8 -4 39112.7 1765.26 12
 -4 -8 5 52384.5 2607.55 6
 -4 8 -5 52381.7 2134.7 12
 -4 -8 5 54960.6 2623.4 9
 -4 8 -5 54096.7 4838.24 2
 -4 8 -5 50781.1 2244.36 5
 4 -8 -5 48284.2 2405.13 7
 -4 8 -5 50600.3 2484.52 4
 -4 -8 6 4245.73 740.749 6
 -4 -8 6 4372.91 695.837 9
 -4 8 -6 4725.66 607.572 5
 4 -8 -6 4732.38 666.912 7
 -4 8 -6 5462.21 745.289 4
 -4 8 -6 5977.57 609.407 12
 -4 -8 7 10328.7 1050.93 6
 -4 -8 7 10234.6 1076.41 9
 -4 8 -7 8805.77 753.815 12
 -4 8 -7 10042.3 872.098 5
 -4 8 -7 8836.03 963.942 4
 4 -8 -7 8203.05 902.463 7
 -4 -8 8 9289.07 1015.8 6
 -4 -8 8 9402.59 1006.01 9
 -4 8 -8 10530 878.797 5
 -4 8 -8 10128 1019.9 4
 4 -8 -8 9448.14 947.596 7
 -4 -8 9 8546.73 941 6
 -4 -8 9 8259.73 953.572 9
 -4 8 -9 7188.97 747.058 5
 -4 8 -9 8187.92 897.818 4
 4 -8 -9 10165.4 970.602 7
 -4 -8 10 2925.34 588.551 6
 -4 -8 10 2792.4 646.942 9
 4 -8 -10 3866.88 634.839 7
 -4 -8 11 6662.12 769.518 6
 -4 -8 11 6578.95 848.659 9
 4 -8 -11 5736.37 715.539 7
 -4 -8 12 4022.19 617.912 6
 -4 -8 12 3758.68 671.016 9
 4 -8 -12 4239.21 582.74 7
 -4 -8 13 1026.14 321.684 6
 -4 -8 13 1722.16 446.115 9
 4 -8 -13 1280.39 356.021 7
 4 -8 -14 823.245 260.456 7
 -4 -8 14 718.259 249.689 6
 -4 8 -14 834.015 258.038 11
 -4 -8 15 1658.02 286.389 6
 -4 8 -15 2206.77 353.982 3
 4 -8 -15 2175.69 341.404 7
 -4 8 -16 2643.27 299.647 3
 4 -8 -16 2989.67 318.126 7
 -4 9 15 596.541 165.166 4
 4 9 -15 279.388 141.136 7
 -4 9 14 3332.37 402.179 4
 4 9 -14 3539.16 433.301 7
 -4 -9 -13 3409.34 404.746 9
 4 9 -13 3642.94 498.264 7
 -4 9 13 4181.5 500.866 4
 -4 9 12 1393.05 346.982 4
 -4 -9 -12 847.319 271.776 9
 4 9 -12 1076.3 340.607 7
 -4 -9 -12 978.237 263.878 10
 -4 9 11 494.233 276.727 4
 -4 -9 -11 645.91 273.3 9
 4 9 -11 682.408 344.68 7
 -4 -9 -11 664.179 256.469 10
 -4 -9 -10 13351.6 1019.64 9
 -4 -9 -10 13508.8 1137.73 11
 -4 -9 -10 12798.3 975.392 10
 -4 9 10 13013.8 1050.74 4
 -4 -9 -9 18916.1 1282.51 9
 -4 -9 -9 18193.7 1411.82 11
 -4 9 9 23312.7 1458.51 4
 -4 -9 -9 20680.1 1306.64 10
 -4 -9 -8 11508.3 1004.21 9
 -4 9 8 11940 1060.14 4
 -4 -9 -8 11508.1 1111.75 11
 -4 -9 -8 12484 1028.65 10
 -4 -9 -7 22332.5 1473.81 9
 -4 9 7 24007.3 1528.96 4
 -4 -9 -7 20157.4 1570.82 11
 -4 -9 -7 23068.8 1451.6 10
 -4 9 6 21270.6 1462.12 4
 -4 -9 -6 22742.1 1482.11 9
 -4 -9 -6 21872.3 1629.5 11
 -4 -9 -6 20445 1389.97 10
 -4 -9 -5 10562.5 1019.3 9
 -4 -9 -5 11088.6 1193.16 11
 -4 -9 -5 11906.5 1022.97 10
 -4 9 5 10479.3 1009.18 4
 -4 -9 -4 10640.7 1012.97 9
 -4 9 4 11415.2 1046.08 4
 -4 -9 -4 9786 1108.07 11
 -4 -9 -3 26908.8 1697.38 9
 -4 9 3 27795.9 1701.76 4
 -4 -9 -3 30491.4 1992.06 11
 -4 -9 -2 12400.9 1108.63 9
 -4 9 2 11640.2 1066.21 4
 -4 -9 -1 27544.5 1712.07 9
 -4 9 1 26446.9 1656.58 4
 -4 -9 0 16757 1312.94 9
 -4 9 0 16126.6 1249.72 4
 -4 -9 1 28110.3 1738.69 9
 -4 9 -1 26087.3 1461.45 5
 -4 9 -1 25202 1624.03 4
 -4 -9 2 12490.2 1114.73 6
 -4 -9 2 14586.1 1222.61 9
 -4 9 -2 11733.5 930.707 5
 -4 9 -2 12513.7 1103.07 4
 -4 -9 3 31808.2 1879.21 6
 -4 -9 3 30155.8 1844.84 9
 -4 9 -3 29218.9 1557.83 5
 -4 9 -3 29879.5 1786.03 4
 -4 -9 4 10095 1040.43 6
 -4 -9 4 9769.79 1027.14 9
 -4 9 -4 10995.5 877.396 5
 4 -9 -4 9607.9 982.66 7
 -4 9 -4 11393.7 1067.69 4
 -4 -9 5 9808.13 1042.41 6
 -4 -9 5 10503.3 1062.57 9
 -4 9 -5 10764.3 854.453 5
 4 -9 -5 9453.16 974.64 7
 -4 9 -5 9573.01 973.92 4
 -4 -9 6 25404.3 1635.3 6
 -4 -9 6 25136.7 1667.41 9
 -4 9 -6 22082.7 1303.83 5
 4 -9 -6 21786 1503.81 7
 -4 9 -6 22183.6 1523.43 4
 -4 -9 7 20988.9 1472.71 6
 -4 -9 7 22146.9 1545 9
 -4 9 -7 19593.6 1222.67 5
 -4 9 -7 20732.4 1451.8 4
 4 -9 -7 20179.9 1423.37 7
 -4 -9 8 13649 1147.05 6
 -4 -9 8 11559.3 1118.17 9
 -4 9 -8 11016.8 888.262 5
 -4 9 -8 12432.7 1079.62 4
 4 -9 -8 10971.7 1017.92 7
 -4 -9 9 22529.3 1515.72 6
 -4 -9 9 24274.1 1623.32 9
 -4 9 -9 24579.7 1524.71 4
 4 -9 -9 23382.4 1501.06 7
 -4 -9 10 13566.8 1113.55 6
 -4 -9 10 13636.8 1160.06 9
 4 -9 -10 13173.8 1060.29 7
 -4 -9 11 563.683 346.119 6
 -4 -9 11 834.729 398.087 9
 4 -9 -11 415.603 266.974 7
 -4 -9 12 693.387 312.171 6
 -4 -9 12 1020.75 378.307 9
 4 -9 -12 763.507 291.644 7
 -4 -9 13 3760.95 497.366 6
 -4 -9 13 4669.16 592.961 9
 4 -9 -13 3419.02 467.707 7
 -4 -9 14 3124.35 375.424 6
 -4 9 -14 3461.34 416.248 3
 4 -9 -14 3271.01 400.467 7
 -4 9 -14 3210.22 370.393 11
 4 -9 -15 250.324 141.305 7
 4 10 -13 7988.88 603.02 7
 -4 10 13 8508.85 602.119 4
 -4 10 12 235.968 209.784 4
 -4 -10 -12 237.76 156.463 9
 4 10 -12 321.148 239.891 7
 -4 10 11 433.806 258.554 4
 -4 -10 -11 168.409 198.534 9
 4 10 -11 360.541 227.29 7
 -4 -10 -10 18844.7 1150.53 9
 4 10 -10 19013.3 1271.47 7
 -4 10 10 20713.3 1233.69 4
 -4 -10 -9 4720.94 593.429 9
 -4 10 9 5050.32 639.738 4
 -4 10 8 2432.4 503.523 4
 -4 -10 -8 1897.85 445.253 9
 -4 10 7 339.97 293.92 4
 -4 -10 -7 169.969 253.926 9
 -4 -10 -6 18240.3 1325.85 9
 -4 10 6 21600.4 1397.33 4
 -4 -10 -5 7097.17 806.594 9
 -4 10 5 6668.03 789.914 4
 -4 -10 -4 1641.08 492.918 9
 -4 10 4 431.076 320.248 4
 -4 -10 -3 9079.66 939.706 9
 -4 10 3 8434.32 890.256 4
 -4 -10 -2 1022.79 383.99 9
 -4 10 2 866.731 657.984 4
 -4 -10 -1 20693.5 1483.59 9
 -4 10 1 23248.3 1525.27 4
 -4 -10 0 7500.35 882.76 9
 -4 10 0 6636.45 676.713 5
 -4 10 0 7314.29 828.35 4
 -4 -10 1 21069.5 1507.32 9
 -4 10 -1 24227.1 1317.68 5
 4 -10 -1 20422 1352.39 8
 -4 10 -1 23600 1509.24 4
 -4 -10 2 873.067 395.281 6
 -4 -10 2 1065.56 470.428 9
 -4 10 -2 1286.75 340.357 5
 4 -10 -2 1439.96 403.396 8
 -4 10 -2 1660.38 482.92 4
 -4 -10 3 8751.15 912.635 6
 -4 -10 3 9671.29 996.338 9
 -4 10 -3 8845.4 761.031 5
 4 -10 -3 7279.78 812.91 8
 -4 10 -3 9906.46 956.621 4
 -4 -10 4 695.09 303.466 6
 -4 -10 4 961.049 452.778 9
 -4 10 -4 1033.69 323.229 5
 -4 10 -4 423.686 310.83 4
 -4 -10 5 5833.53 761.247 6
 -4 -10 5 6578.62 836.349 9
 -4 10 -5 6707.22 651.847 5
 -4 10 -5 8004.82 859.328 4
 -4 -10 6 20513.6 1390.25 6
 -4 -10 6 19393 1413.29 9
 -4 10 -6 17771.4 1097.11 5
 -4 10 -6 19447.4 1347.76 4
 -4 -10 7 -197.129 323.109 6
 -4 -10 7 201.114 384.81 9
 -4 10 -7 144.496 188.468 5
 4 -10 -7 104.953 274.636 7
 -4 10 -7 -386.855 314.515 4
 -4 -10 8 1699.32 480.068 6
 -4 -10 8 1334.85 500.741 9
 -4 10 -8 2126.97 466.837 4
 4 -10 -8 1782.36 461.652 7
 -4 -10 9 4257.46 617.419 6
 -4 -10 9 4104.96 663.134 9
 4 -10 -9 3914.95 573.382 7
 -4 -10 10 20941.9 1285.94 6
 -4 -10 10 20871.9 1347.1 9
 4 -10 -10 18539.3 1217.49 7
 -4 -10 11 701.461 290.424 6
 -4 -10 11 427.605 302.652 9
 4 -10 -11 508.558 273.644 7
 -4 -10 12 383.516 212.203 6
 -4 -10 12 68.3341 184.033 9
 4 -10 -12 127.687 190.702 7
 -4 -10 13 6979.32 552.266 6
 -4 10 -13 7393.65 541.484 3
 -4 10 -13 7463.51 559.479 11
 -4 11 12 2398.04 300.963 4
 -4 -11 -11 1716.08 262.99 9
 4 11 -11 1438.11 281.922 7
 -4 11 11 1719.14 294.636 4
 -4 -11 -10 -8.46205 206.358 9
 4 11 -10 576.469 237.624 7
 -4 11 10 54.7401 183.938 4
 -4 11 9 1477.6 321.383 4
 -4 -11 -9 1774.09 377.558 9
 -4 -11 -8 2193.34 417.893 9
 -4 11 8 2743.15 454.648 4
 -4 -11 -7 9888.26 867.845 9
 -4 11 7 10486.6 868.314 4
 -4 -11 -6 4551.43 628.379 9
 -4 11 6 6810.5 716.445 4
 -4 -11 -5 3743.2 609.938 9
 -4 11 5 4248.43 605.007 4
 -4 -11 -4 4686.71 693.471 9
 -4 11 4 3921.61 589.186 4
 -4 -11 -3 1218.52 421.656 9
 -4 11 3 1077.11 399.149 4
 -4 -11 -2 -139.696 307.733 9
 -4 11 2 220.286 264.468 4
 -4 -11 -1 3522.1 629.801 9
 -4 11 1 4079.67 607.074 4
 -4 -11 0 5270.07 720.94 9
 -4 11 0 4883.38 668.999 4
 -4 -11 1 4941.54 729.006 9
 4 -11 -1 4253.12 555.208 8
 -4 11 -1 4811.31 666.474 4
 -4 -11 2 -290.052 383.483 9
 4 -11 -2 453.185 298.279 8
 -4 11 -2 -96.8475 271.637 4
 -4 -11 3 -311.158 302.341 6
 -4 -11 3 808.721 424.505 9
 4 -11 -3 610.382 280.289 8
 -4 11 -3 1437.85 401.491 4
 -4 -11 4 3442.25 571.05 6
 -4 -11 4 3820.31 672.637 9
 4 -11 -4 4776.35 612.904 8
 -4 11 -4 4574.66 608.054 4
 -4 -11 5 4571.39 626.974 6
 -4 -11 5 4458.08 661.466 9
 4 -11 -5 4491.2 619.467 8
 -4 11 -5 4401.04 601.023 4
 -4 -11 6 5646.06 669.729 6
 -4 -11 6 5652.33 734.369 9
 4 -11 -6 5341.9 641.081 8
 -4 11 -6 4313.03 598.017 4
 -4 -11 7 9620.78 865.506 6
 -4 -11 7 9600.51 920.207 9
 -4 11 -7 10072.5 849.475 4
 -4 -11 8 2193.14 426.828 6
 -4 -11 8 2228.09 489.699 9
 -4 -11 9 2025.27 396.102 6
 -4 -11 9 2215.9 426.163 9
 -4 -11 10 -159.44 199.343 6
 -4 -11 10 171.873 204.224 9
 -4 -11 11 1177.77 291.091 6
 -4 -11 11 1555.34 329.048 9
 -4 -11 12 2226.96 307.224 6
 4 -11 -12 2707.4 300.45 8
 -4 12 10 5785.23 434.632 4
 -4 -12 -9 5128.23 476.908 9
 -4 12 9 6407.52 507.669 4
 4 12 -9 5989.34 505.334 7
 -4 -12 -8 4492.08 487.503 9
 -4 12 8 5669.08 515.222 4
 4 12 -8 4324.43 482.115 7
 -4 -12 -7 1408.08 318.31 9
 -4 12 7 1070.19 268.356 4
 -4 -12 -6 11773.6 881.556 9
 -4 12 6 10834.8 801.025 4
 -4 -12 -5 3557.97 522.545 9
 -4 12 5 3572.23 476.231 4
 -4 -12 -4 1363.16 399.579 9
 -4 12 4 924.335 302 4
 -4 -12 -3 5605.37 666.72 9
 -4 12 3 4840.73 582.027 4
 -4 -12 -2 4490.46 638.335 9
 -4 12 2 4731.67 579.516 4
 -4 -12 -1 1281.59 424.79 9
 -4 12 1 1987.12 397.285 4
 -4 -12 0 1198.07 424.195 9
 -4 12 0 1023.45 342.944 4
 -4 -12 1 1417.87 426.689 9
 4 -12 -1 1703.75 360.473 8
 -4 12 -1 1449.02 343.771 4
 -4 -12 2 4505.06 635.537 9
 4 -12 -2 4286.55 538.783 8
 -4 12 -2 4472.94 548.079 4
 -4 -12 3 4784.45 648.591 9
 4 -12 -3 5212.7 588.871 8
 -4 12 -3 4893.29 565.105 4
 -4 -12 4 392.322 247.694 6
 -4 12 -4 1370.17 332.819 4
 -4 -12 4 1237.6 384.825 9
 4 -12 -4 1307.59 313.943 8
 -4 -12 5 3101.11 445.064 6
 -4 -12 5 3553.12 544.218 9
 4 -12 -5 3622.27 478.875 8
 -4 12 -5 3803.39 491.571 4
 -4 -12 6 9552.43 771.695 6
 -4 -12 6 11450.1 901.367 9
 4 -12 -6 10221.2 770.035 8
 -4 12 -6 11297.6 796.145 4
 -4 -12 7 1030.7 298.994 6
 -4 -12 7 2099.71 444.282 9
 4 -12 -7 924.558 279.442 8
 -4 -12 8 4006.28 478.642 6
 -4 -12 8 5121.34 545.611 9
 4 -12 -8 4204.6 455.828 8
 -4 -12 9 6271.52 537.018 6
 -4 -12 9 6691.24 583.18 9
 4 -12 -9 6523.4 519.708 8
 -4 -12 10 5649.28 460.539 6
 -4 -12 10 6015.08 501.291 9
 -4 -13 -7 9394.43 606.43 9
 -4 -13 -6 6560.2 536.745 9
 -4 13 6 6303.78 478.247 4
 -4 -13 -5 6766.13 577.763 9
 -4 13 5 5271.89 465.326 4
 -4 -13 -4 7809.71 653.89 9
 -4 13 4 8390.15 605.138 4
 -4 -13 -3 2289.14 408.676 9
 -4 13 3 1762.9 302.353 4
 -4 -13 -2 2300.98 410.744 9
 -4 13 2 2284.04 367.662 4
 -4 -13 -1 2348.97 418.636 9
 -4 13 1 1799.42 294.755 4
 -4 -13 0 6975.67 666.888 9
 -4 13 0 6295.67 553.815 4
 -4 -13 1 1881.48 422.945 9
 -4 13 -1 1987.88 324.183 4
 -4 -13 2 1997.71 400.852 9
 -4 13 -2 2763.12 360.667 4
 -4 -13 3 1934.53 355.986 9
 4 -13 -3 2425.83 320.547 8
 -4 13 -3 2164.36 343.505 4
 -4 -13 4 8035.75 686.93 9
 4 -13 -4 9112.01 609.287 8
 -4 13 -4 7647.25 562.353 4
 -4 -13 5 5258.13 548.698 9
 4 -13 -5 6155.34 470.618 8
 -4 -13 6 6472.14 562.864 9
 4 -13 -6 5783.29 451.582 8
 -4 -13 7 9974.51 664.29 9
 -4 -14 -3 7006.9 499.07 9
 -4 -14 -2 4426.79 408.13 9
 -4 -14 -1 5629.24 472.762 9
 -4 -14 0 2.74964 147.302 9
 -4 -14 1 6045.56 494.778 9
 -4 -14 2 4896.84 435.539 9
 -4 -14 3 6426.68 487.313 9
 -5 0 0 533.393 395.872 2
 -5 0 -1 26081.8 2292.79 2
 -5 0 -2 6975.24 1196.78 2
 -5 0 -3 23400.5 2336.36 2
 -5 0 -4 2058.61 812.642 2
 -5 0 -5 15918.4 1224.25 11
 -5 0 -5 13888.3 1976.44 2
 -5 0 5 13302.6 1051.18 6
 -5 0 -6 2947.06 416.618 12
 -5 0 -6 2910.44 581.453 11
 -5 0 -6 1522.75 911.513 2
 -5 0 6 4112.22 606.774 6
 -5 0 -6 2912.47 533.84 10
 -5 0 7 211.26 244.346 6
 -5 0 -7 364.37 259.202 12
 -5 0 -7 -225.835 505.193 2
 -5 0 -7 286.08 359.581 11
 -5 0 -7 568.778 316.271 10
 -5 0 -8 22033.1 1262.22 5
 -5 0 -8 20349.7 1514.78 11
 -5 0 -8 22489.6 1302.66 12
 -5 0 -8 20582.3 1423 10
 -5 0 -8 21746.8 2811.1 2
 -5 0 8 22861.6 1444.66 6
 -5 0 9 1757.25 432.367 6
 -5 0 -9 2563.7 487.497 12
 5 0 -9 1337.96 402.536 7
 -5 0 -9 3221.04 1073.1 2
 -5 0 -9 1094.38 429.271 11
 -5 0 -9 1928.5 469.732 10
 -5 0 10 1305.12 399.401 6
 -5 0 -10 825.445 278.659 3
 -5 0 -10 440.933 871.215 2
 5 0 -10 1187.9 361.427 7
 -5 0 -10 1702.39 508.202 11
 -5 0 -10 588.555 319.341 10
 -5 0 -11 4393.35 747.788 11
 -5 0 11 3131.04 481.248 6
 -5 0 -11 3478.04 554.226 3
 5 0 -11 3502.95 596.565 7
 -5 0 -11 3704.72 651.559 10
 -5 0 -12 -395.591 386.484 11
 -5 0 12 813.419 255.616 6
 -5 0 -12 1157.58 331.918 3
 5 0 -12 52.4996 227.032 7
 -5 0 -12 111.55 292.337 10
 -5 0 -13 2238.78 485.92 3
 5 0 -13 2435.61 493.088 7
 -5 0 -13 3446.85 654.554 11
 -5 0 -13 2995.78 591.395 10
 5 0 -14 -25.344 281.963 10
 -5 0 -14 157.307 242.297 3
 -5 0 -14 48.9178 287.071 11
 5 0 -14 229.924 309.334 7
 -5 0 -14 146.44 319.196 10
 5 0 -15 2086.96 435.996 10
 -5 0 -15 1625.82 384.974 3
 5 0 -15 2448.02 457.912 7
 -5 0 -15 2600.38 475.747 11
 -5 0 -15 2206.49 488.238 10
 5 0 -16 -346.163 244.107 10
 -5 0 -16 224.68 195.112 3
 5 0 -16 150.316 198.173 7
 -5 0 -16 229.634 240.151 10
 -5 0 -16 -76.8169 249.163 11
 -5 0 -17 17488.5 951.52 3
 5 0 -17 24995 1206.48 7
 -5 0 -17 21924.1 1125.38 10
 5 0 -17 26496.4 1174.88 10
 5 0 -18 14757 795.87 7
 5 0 -18 14105.9 742.715 10
 5 1 -18 122.547 142.984 10
 5 1 -18 5.1877 161.501 7
 5 1 -17 25.0346 189.201 10
 5 1 -17 70.5756 194.234 7
 -5 -1 -17 537.945 249.4 10
 5 1 -16 7888 721.608 7
 -5 -1 -16 9864.65 869.208 10
 -5 -1 -16 9273.88 739.724 11
 5 1 -16 10228 795.828 10
 5 1 -15 842.324 390.19 10
 -5 -1 -15 1321.78 325.058 3
 5 1 -15 1275.61 372.554 7
 -5 -1 -15 1324.96 398.021 11
 -5 -1 -15 1310.65 424.65 10
 -5 -1 -14 288.058 246.149 3
 5 1 -14 103.451 289.335 7
 -5 -1 -14 89.2287 300.436 11
 -5 -1 -14 687.06 383.031 10
 -5 -1 -13 6643.53 689.464 3
 5 1 -13 5722.67 714.235 7
 -5 -1 -13 6355.44 808.021 11
 -5 -1 -13 6449.42 865.168 10
 5 1 -12 13817 1125.47 7
 -5 -1 -12 14178.3 1234.05 11
 -5 -1 -12 15717.4 1313.15 10
 5 1 -11 6361.44 756.523 7
 -5 -1 -11 6723.92 890.304 11
 -5 -1 -11 6224.23 836.374 10
 -5 1 11 7988.74 771.599 6
 -5 -1 -10 4440.03 1665.72 2
 -5 -1 -10 3104.02 635.341 11
 -5 1 10 3996.44 577.072 6
 5 1 -10 3031.79 534.957 7
 -5 -1 -10 3030.7 612.74 10
 -5 -1 -9 13533.4 1168.96 10
 5 1 -9 13950.8 1102.86 7
 -5 -1 -9 15516.4 1293.99 11
 -5 -1 -9 16257.7 2327.98 2
 -5 1 9 14343 1108.26 6
 -5 -1 -8 22560.9 1503.93 10
 -5 -1 -8 26955.3 1418.39 12
 -5 -1 -8 25311.4 1678.57 11
 -5 -1 -8 26619.4 2969.87 2
 -5 1 8 25623.9 1514.87 6
 -5 -1 -7 19080.1 1132.26 12
 -5 -1 -7 18075 2273.38 2
 -5 -1 -7 21286.5 1479.46 11
 -5 -1 -7 18190.8 1294.69 10
 -5 1 7 17730.7 1248.62 6
 -5 -1 -6 14175.7 1186.03 11
 -5 -1 -6 14375.5 1105.76 10
 -5 -1 -6 12039.9 1846.61 2
 -5 -1 -6 13385.4 911.63 12
 -5 1 6 13885.2 1062.88 6
 -5 -1 -5 16541.6 1243.53 11
 -5 -1 -5 16845.1 2171.57 2
 -5 1 5 15863.8 1143.18 6
 -5 -1 -4 21510.7 2316.29 2
 -5 -1 -3 9787.2 1459.55 2
 -5 -1 -2 1935.59 758.581 2
 -5 -1 -1 7158.24 1151.14 2
 -5 1 0 2623.47 739.495 2
 -5 1 -1 6893.97 1202.07 2
 -5 1 -2 -92.8866 460.718 2
 -5 1 -3 9951.29 1505.94 2
 -5 1 -4 25101.4 2543.83 2
 -5 1 -5 17385.4 2243.43 2
 -5 1 -5 15314.5 1034.46 12
 -5 1 -5 16772.4 1274.04 11
 -5 -1 5 15137.3 1146.96 6
 -5 1 -6 14989.8 983.571 5
 -5 1 -6 13271.9 974.186 12
 -5 1 -6 15339.9 1225.21 11
 -5 -1 6 12580.7 1047.89 6
 -5 1 -6 12710 2017.62 2
 -5 1 -7 16767.9 1071.74 5
 -5 1 -7 16959.3 1111.68 12
 -5 1 -7 18152 1383.85 11
 -5 1 -7 15227.5 2249.78 2
 -5 1 -7 17699.5 1226.75 10
 -5 -1 7 16717 1242.58 6
 -5 1 -8 27541 1518.81 12
 -5 1 -8 29078.7 1517.36 5
 -5 1 -8 27963.3 1809.25 11
 -5 1 -8 28578.4 1652.93 10
 -5 1 -8 27966.5 3170.85 2
 -5 -1 8 27776.3 1674.84 6
 -5 1 -9 15952.4 1088.98 5
 -5 1 -9 13085.8 1024.91 12
 5 -1 -9 13111.2 1055 7
 -5 1 -9 15153.3 1298.9 11
 -5 1 -9 13772.9 1132.37 10
 -5 1 -9 18163 2529.92 2
 -5 -1 9 14436.5 1156.9 6
 -5 -1 10 2540.36 514.777 6
 5 -1 -10 3457.64 545.351 7
 -5 1 -10 925.123 907.311 2
 -5 1 -10 3383.92 676.343 11
 -5 1 -10 2931.84 562.014 10
 5 -1 -11 7576.65 787.954 7
 -5 1 -11 5035.71 701.243 10
 -5 -1 11 6977.43 762.05 6
 -5 1 -11 5328.16 806.837 11
 -5 1 -12 14420.7 1138.59 3
 5 -1 -12 14272.6 1116.73 7
 -5 1 -12 15767.8 1312.59 11
 -5 1 -12 13178.6 1141.15 10
 -5 -1 12 13587.8 1066.58 6
 -5 -1 13 6691.42 696.472 6
 -5 1 -13 6299.83 757.784 3
 5 -1 -13 5498.84 688.239 7
 -5 1 -13 6612.76 855.496 11
 -5 1 -13 6417.9 796.163 10
 5 -1 -14 556.16 295.944 10
 -5 1 -14 -188.453 257.916 3
 -5 1 -14 531.791 319.133 11
 5 -1 -14 125.496 277.763 7
 -5 1 -14 583.684 295.149 10
 5 -1 -15 1452.12 349.001 10
 -5 1 -15 1238.44 354.906 3
 5 -1 -15 1536.95 390.738 7
 -5 1 -15 1258.84 341.278 10
 -5 1 -15 1091.46 382.771 11
 -5 1 -16 8301.91 691.62 3
 5 -1 -16 8882.8 746.597 7
 -5 1 -16 9295.79 741.603 11
 -5 1 -16 8509.07 714.467 10
 5 -1 -16 8558.96 692.639 10
 5 -1 -17 13.398 180.124 10
 -5 1 -17 -117.65 187.546 3
 5 -1 -17 264.536 202.856 7
 5 -1 -18 307.318 162.301 7
 5 2 -18 671.065 174.351 10
 5 2 -18 465.901 145.977 7
 -5 -2 -18 717.999 216.808 10
 5 2 -17 302.237 180.869 10
 5 2 -17 325.541 324.367 7
 -5 -2 -17 336.391 254.179 10
 5 2 -16 2987.42 438.473 7
 -5 -2 -16 3742.27 445.519 11
 5 2 -16 4061.98 512.177 10
 -5 -2 -16 2551.57 476.408 10
 5 2 -15 1670.84 396.229 10
 -5 -2 -15 1262.01 357.088 11
 5 2 -15 844.913 340.541 7
 -5 -2 -15 1005.13 393.902 10
 5 2 -14 28058.3 1617.7 7
 -5 -2 -14 27180.2 1630.11 11
 -5 -2 -14 28495.3 1742.47 10
 5 2 -13 12919.2 1075.28 7
 -5 -2 -13 11969.6 1082.82 11
 -5 -2 -13 10770.4 1089.96 10
 5 2 -12 16232.3 1215.13 7
 -5 -2 -12 16081.6 1309.05 11
 -5 -2 -12 15953.1 1319.44 10
 5 2 -11 11645.5 1035.89 7
 -5 -2 -11 14508.3 1239.99 11
 -5 -2 -11 15397.4 1265.82 10
 5 2 -10 13500 1095.7 7
 -5 -2 -10 12120.9 2084.49 2
 -5 -2 -10 14539.1 1251.21 11
 -5 -2 -10 12714.8 1166.22 10
 -5 2 10 12484.9 976.194 6
 5 2 -9 14350.8 1100.1 7
 -5 -2 -9 12235 2079.28 2
 -5 -2 -9 13258.9 1193.55 11
 -5 -2 -9 13218.2 1151.16 10
 -5 2 9 14574.7 1064.07 6
 -5 2 8 1343.42 373.747 6
 -5 -2 -8 452.66 831.607 2
 -5 -2 -8 942.553 359.716 10
 -5 -2 -8 700.971 462.459 11
 -5 -2 -7 75509.3 3225.75 11
 -5 -2 -7 84400.6 5237.36 2
 -5 -2 -7 71245.3 3037.48 10
 -5 2 7 69982.7 2909.95 6
 -5 -2 -6 48097 3813.73 2
 -5 -2 -6 52553.5 2494.33 11
 -5 -2 -6 47776.2 2325.61 10
 -5 2 6 50244.3 2267.47 6
 -5 -2 -5 3818.5 970.109 2
 -5 -2 -5 3331.43 558.377 11
 -5 2 5 4766.77 607.85 6
 -5 -2 -5 3205.15 544.956 10
 -5 -2 -4 8962.14 1403.92 2
 -5 2 4 10943.8 892.899 6
 -5 -2 -3 58701.3 3781.76 2
 -5 -2 -2 19526 1980.53 2
 -5 2 1 645.27 460.42 2
 -5 2 0 53130.7 3512.97 2
 -5 2 -1 93.8759 336.493 2
 -5 2 -2 15656.3 1947.7 2
 -5 2 -3 60095.8 4145.04 2
 -5 -2 4 10022.7 914.939 6
 -5 2 -4 7113.78 1380.46 2
 -5 -2 5 4354.14 586.581 6
 -5 2 -5 3593.38 492.608 5
 -5 2 -5 4087.68 1208.43 2
 -5 -2 6 48850.9 2387.93 6
 -5 2 -6 54464.4 4271.62 2
 -5 2 -6 51920.1 2189.12 5
 -5 2 -6 50742.1 2332.38 4
 -5 2 -6 51521.8 2205.03 12
 -5 -2 7 68599.1 3063.09 6
 -5 2 -7 72668.7 5226.45 2
 -5 2 -7 73076.5 2821.26 5
 -5 2 -7 71652.8 3032.89 4
 -5 2 -7 75142.2 2853.91 12
 -5 -2 8 1052.63 416.531 6
 -5 -2 8 942.832 383.139 9
 -5 2 -8 566.904 315.317 5
 -5 2 -8 655.952 321.058 12
 5 -2 -8 1684.55 355.355 7
 -5 2 -8 1108.88 417.176 11
 -5 2 -8 1571.85 734.544 2
 -5 -2 9 12634.8 1102.85 9
 -5 2 -9 13569.5 1035.58 12
 -5 2 -9 12177.2 971.195 5
 5 -2 -9 14825.7 1106.42 7
 -5 2 -9 11593.2 1177.15 11
 -5 2 -9 11176.1 2104.54 2
 -5 -2 9 15166.5 1202.49 6
 -5 2 -10 14683.9 1084.16 5
 5 -2 -10 13425.9 1068.25 7
 -5 2 -10 12495.4 1030.04 12
 -5 2 -10 13493.8 1259.98 11
 -5 -2 10 13837.7 1168.12 6
 5 -2 -11 12369.1 1039.98 7
 -5 2 -11 10516.8 1128.09 11
 -5 -2 11 13454.8 1108.47 6
 5 -2 -12 15933 1183.26 7
 -5 2 -12 14952.9 1319.51 11
 -5 -2 12 15653.2 1170.51 6
 -5 2 -13 11267.3 1125.52 11
 -5 2 -13 11967.2 1049.43 3
 5 -2 -13 13751.1 1072.37 7
 5 -2 -13 14662.4 1048.49 10
 -5 -2 13 14736 1062.54 6
 -5 2 -14 31466.5 1763.22 11
 -5 2 -14 26517.3 1554.22 3
 5 -2 -14 28814 1576.61 7
 -5 -2 14 26994.3 1424.54 6
 5 -2 -14 28182.6 1499.66 10
 5 -2 -15 1410.42 298.486 10
 -5 2 -15 1163.17 383.912 3
 5 -2 -15 1179.63 327.841 7
 -5 2 -15 1124.25 363.65 11
 -5 2 -16 2759.58 423.651 3
 5 -2 -16 3772.97 480.98 7
 -5 2 -16 2814.39 410.066 11
 5 -2 -16 3057.13 386.467 10
 5 -2 -17 -234.066 177.172 10
 -5 2 -17 -279.308 203.157 3
 5 -2 -17 399.39 304.851 7
 5 -2 -18 514.776 175.04 7
 5 3 -18 3290.93 305.859 10
 5 3 -17 6421.83 550.255 7
 -5 -3 -17 5983.36 580.063 10
 5 3 -17 7550.95 571.282 10
 5 3 -16 8359.69 738.149 7
 -5 -3 -16 10955.6 890.196 10
 5 3 -16 11301.9 800.285 10
 5 3 -15 3958.74 541.887 7
 -5 -3 -15 4904.13 577.528 11
 -5 -3 -15 4604.91 652.877 10
 5 3 -15 4098.01 573.163 10
 5 3 -14 16121.5 1167.87 7
 -5 -3 -14 15383.6 1165 11
 -5 3 14 15687.5 1034.57 4
 -5 -3 -14 16429.7 1283.5 10
 -5 3 13 1783.87 390.51 4
 5 3 -13 1148.52 395.255 7
 -5 -3 -13 2222.1 522.791 11
 -5 -3 -13 2439.18 587.027 10
 5 3 -12 19023.3 1377.12 7
 -5 -3 -12 21982.4 1543.06 11
 -5 3 12 21967.4 1354.91 4
 -5 -3 -12 24099.2 1628.66 10
 -5 3 11 2605.3 492.966 4
 5 3 -11 3208.98 570.17 7
 -5 -3 -11 2669.73 572.009 11
 -5 -3 -11 3682.22 699.035 10
 5 3 -10 21635.9 1453.3 7
 -5 -3 -10 20116.1 1528.86 11
 -5 3 10 23438.3 1468.28 4
 -5 -3 -10 22357.9 1554.53 10
 -5 3 10 24090.7 1344.7 6
 5 3 -9 24299.7 1542.22 7
 -5 -3 -9 24781.4 1685.23 11
 -5 -3 -9 26055 2996.06 2
 -5 3 9 26389.2 1591.86 4
 -5 -3 -9 27493.1 1721.67 10
 -5 3 9 26504.9 1470.2 6
 -5 -3 -8 23695.1 1625.28 11
 -5 -3 -8 24662.8 2852.24 2
 -5 3 8 24415.3 1511.93 4
 -5 -3 -8 26701.4 1673.67 10
 -5 3 8 23073.5 1394.28 6
 -5 3 7 4816.63 654.82 4
 -5 -3 -7 6339.74 821.509 11
 -5 -3 -7 6165.65 1404.81 2
 -5 -3 -7 6424.77 782.329 10
 -5 3 7 6185.42 691.903 6
 -5 -3 -6 5977.01 1269.65 2
 -5 3 6 6630.37 713.294 4
 -5 -3 -6 5514.22 756.544 11
 -5 -3 -6 6229.66 769.067 10
 -5 3 6 7323.81 752.719 6
 -5 -3 -5 40950 2166.02 11
 -5 -3 -5 36330 3172.64 2
 -5 -3 -5 41912 2124.05 10
 -5 3 5 43698.9 2005.95 6
 -5 -3 -4 23736 2466.74 2
 -5 -3 -4 28213.9 1673.37 11
 -5 -3 -4 28514.4 1659.15 10
 -5 3 4 28882.2 1549.56 6
 -5 -3 -3 14891.7 1805.31 2
 -5 -3 -3 17346 1280.04 10
 -5 3 3 20330.1 1238.59 6
 -5 3 2 17742 1988.18 2
 -5 -3 -2 11840.5 1548.31 2
 -5 3 2 14543.1 1013.29 6
 -5 3 1 1649.78 661.507 2
 -5 3 0 489.969 358.028 2
 -5 3 -1 1221.38 653.56 2
 -5 3 -2 11288.3 1736.49 2
 -5 -3 3 19669.1 1344.63 6
 -5 3 -3 19514.9 2386.56 2
 -5 -3 4 28471.6 1675.94 6
 -5 3 -4 27603.9 2871.71 2
 -5 3 -4 27778.9 1485.6 5
 -5 3 -4 29431 1473.42 6
 -5 -3 5 40364.4 2118.12 6
 -5 3 -5 38514.9 3638.39 2
 -5 3 -5 39810.8 1888.75 5
 -5 3 -5 39906.7 2031.99 4
 -5 3 -5 44034.2 1881.68 6
 -5 -3 6 5964.05 761.995 6
 -5 3 -6 5033.62 606.984 5
 -5 3 -6 5938.03 669.85 12
 -5 3 -6 4561.11 648.097 4
 -5 3 -6 5675.15 589.006 6
 -5 3 -6 5766.58 1381.8 2
 -5 -3 7 5073.95 739.812 6
 -5 -3 7 5590.18 746.889 9
 -5 3 -7 6141.51 687.393 12
 -5 3 -7 5959.02 693.237 5
 -5 3 -7 5388.58 736.342 4
 -5 3 -7 5600.62 1416.28 2
 -5 -3 8 21405.8 1529.4 6
 -5 3 -8 24750.6 3023.42 2
 -5 -3 8 19275.1 1443.69 9
 -5 3 -8 24800.2 1428.93 5
 -5 3 -8 22262.6 1521.76 4
 5 -3 -8 25210.1 1476.32 7
 -5 3 -8 24662.9 1408.08 12
 -5 -3 9 25008.3 1650.59 6
 -5 -3 9 23508.3 1622.46 9
 -5 3 -9 25584.6 1476.54 5
 5 -3 -9 26289 1544.81 7
 -5 3 -9 27054.3 1519.39 12
 -5 3 -9 27235.1 3213.83 2
 -5 -3 10 21780.7 1498.66 6
 -5 -3 10 22418.7 1550.63 9
 -5 3 -10 22692.8 1413.09 5
 5 -3 -10 22293.5 1432.36 7
 -5 3 -10 20515.2 1330.79 12
 -5 3 -10 19669.1 1573.35 11
 -5 -3 11 3237 615.174 6
 5 -3 -11 3575.58 547.063 7
 -5 3 -11 2822.72 664.551 11
 5 -3 -12 21305.7 1389.52 7
 -5 3 -12 22764 1615.4 11
 -5 -3 12 22926.3 1462.65 6
 5 -3 -13 1944 427.367 10
 -5 -3 13 1667.53 387.712 6
 5 -3 -13 1797.83 433.18 7
 -5 3 -13 1959.01 532.054 11
 -5 3 -14 13785.4 1084.37 3
 5 -3 -14 17555.4 1160.6 7
 -5 3 -14 14699.1 1177.87 11
 5 -3 -14 14154.9 938.71 10
 -5 -3 14 15099 1022.93 6
 -5 3 -15 4114.94 552.85 3
 5 -3 -15 4384.89 550.292 7
 -5 3 -15 3408.63 515.915 11
 -5 3 -16 9090.71 725.179 3
 5 -3 -16 9070.81 721.152 7
 -5 3 -16 9663.96 724.846 11
 -5 3 -17 4853.19 456.806 3
 5 -3 -17 6228.15 523.675 7
 5 4 -17 899.576 192.023 10
 5 4 -17 740.934 201.114 7
 -5 -4 -17 599.023 234.356 10
 -5 4 16 -586.112 173.743 4
 5 4 -16 411.159 241.804 10
 5 4 -16 341.285 204.666 7
 -5 -4 -16 134.454 271.279 10
 -5 4 15 2416.37 377.248 4
 5 4 -15 2858.87 475.736 10
 5 4 -15 2775.63 464.671 7
 -5 -4 -15 2788.44 422.849 11
 -5 -4 -15 3027.35 511.663 10
 -5 4 14 1784.92 350.576 4
 -5 -4 -14 3677.03 570.908 11
 5 4 -14 2475.05 483.795 7
 -5 -4 -14 3317.06 594.595 10
 -5 -4 -13 7403.68 843.18 11
 5 4 -13 8223.96 849.406 7
 -5 4 13 7293.98 732.189 4
 -5 -4 -13 8921.08 960.364 10
 5 4 -12 6497.71 776.532 7
 -5 -4 -12 7152.56 869.824 11
 -5 4 12 6524.51 733.014 4
 -5 -4 -12 6883.45 880.241 10
 -5 4 11 5609.58 699.424 4
 5 4 -11 6106.23 758.362 7
 -5 -4 -11 5646.96 797.748 11
 -5 -4 -11 5242.44 770.625 10
 -5 4 10 1852.25 465.621 4
 5 4 -10 2068.91 487.506 7
 -5 -4 -10 2961.09 624.701 11
 -5 -4 -10 3453.33 667.564 10
 -5 4 9 878.143 383.678 4
 -5 4 9 1346.19 329.551 6
 5 4 -9 1588.7 447.991 7
 -5 -4 -9 1700.57 538.504 11
 -5 -4 -9 1617.93 523.376 10
 -5 -4 -8 37910.2 2154.68 11
 5 4 -8 38346.3 1975.03 7
 -5 4 8 37717 2015.54 4
 -5 -4 -8 36777.6 2085.98 10
 -5 4 8 39836.7 1857.47 6
 -5 -4 -8 30451.2 3281.15 2
 -5 -4 -7 12677.7 1949.58 2
 -5 4 7 12776.5 1083.55 4
 -5 -4 -7 14076.6 1221.97 11
 -5 -4 -7 12489.5 1131.16 10
 -5 4 7 15436 1058.73 6
 -5 -4 -6 15737.2 2235.45 2
 -5 4 6 14557.1 1141.07 4
 -5 -4 -6 15595.7 1275.61 11
 -5 -4 -6 12862.2 1165.75 10
 -5 4 6 15686.4 1098.02 6
 -5 4 5 811.742 340.585 4
 -5 4 5 1306.26 361.498 6
 -5 -4 -5 1030.29 640.416 2
 -5 -4 -5 538.008 416.604 11
 -5 -4 -5 1583.51 486.53 10
 -5 4 4 17230.3 1246.66 4
 -5 -4 -4 17595.6 2078.54 2
 -5 -4 -4 19521.7 1399.84 11
 -5 -4 -4 20660.1 1414.08 10
 -5 4 4 17191 1170.15 6
 -5 -4 -3 6510.75 781.839 10
 -5 -4 -3 5600.79 1244.88 2
 -5 -4 -3 5017.84 740.936 11
 -5 4 3 5447.96 662.37 4
 -5 4 3 7114.01 700.406 6
 -5 4 2 63203 4188.65 2
 -5 4 2 64806.4 2706.44 4
 -5 -4 -2 64319.6 2782.39 11
 -5 -4 -2 62957.6 2807.69 10
 -5 4 2 64828.9 2611.98 6
 -5 4 1 14601.9 1960.49 2
 -5 -4 -1 21006.3 1411.62 10
 -5 4 1 17511.4 1139.99 6
 -5 4 0 2214.18 414.961 6
 -5 4 0 1235.42 798.044 2
 -5 -4 0 2527.39 525.825 10
 -5 4 -1 17614.5 2248.27 2
 -5 4 -1 18321.9 1227.03 4
 -5 4 -1 19474.6 1186.26 6
 -5 -4 1 15728.1 1286.9 10
 -5 -4 2 65889.1 2744.32 6
 -5 4 -2 58583.3 4392.37 2
 -5 4 -2 60653.3 2605.04 4
 -5 -4 2 59392.6 2782.38 10
 -5 4 -2 58553.8 2447.1 6
 -5 -4 3 6679.89 785.547 6
 -5 4 -3 5179.86 1303.95 2
 -5 4 -3 5105.52 593.464 6
 -5 4 -3 4096.56 602.852 4
 -5 -4 4 19959.1 1436.67 6
 -5 4 -4 17712.1 2525.44 2
 -5 4 -4 19549.5 1231.34 5
 -5 4 -4 19723 1343.73 4
 -5 4 -4 21275.1 1252.09 6
 -5 4 -5 282.43 457.874 2
 -5 4 -5 638.263 282.298 6
 -5 -4 5 654.041 331.57 6
 -5 -4 5 936.782 400.109 9
 -5 4 -5 532.83 345.397 5
 -5 4 -5 338.903 256.139 12
 -5 4 -5 662.407 322.986 4
 -5 -4 6 15608 1287.99 6
 -5 4 -6 13873.7 2396.12 2
 -5 -4 6 13589.8 1142.29 9
 -5 4 -6 15016.6 1072.25 5
 -5 4 -6 14453.2 1180.94 4
 -5 4 -6 15020.9 1070.28 12
 -5 4 -6 14581.4 1015.01 6
 -5 -4 7 12383.5 1165.04 6
 -5 -4 7 15624.2 1247.81 9
 -5 4 -7 13437.7 1016.12 5
 -5 4 -7 14929 1061.56 12
 -5 4 -7 12065.8 1105.1 4
 -5 4 -7 14302.3 2447.48 2
 -5 -4 8 39139.7 2173.67 6
 -5 4 -8 41038.1 4071.38 2
 -5 -4 8 38700.7 2125.05 9
 -5 4 -8 39858.6 1933.68 5
 -5 4 -8 38292.3 2133.86 4
 5 -4 -8 38438.7 1973.12 7
 -5 4 -8 38161.5 1879.28 12
 -5 -4 9 1918.27 499.747 6
 -5 -4 9 2289.21 532.502 9
 -5 4 -9 1389.86 428.441 5
 -5 4 -9 1713.99 434.659 12
 5 -4 -9 1520.8 421.478 7
 -5 -4 10 2513.04 586.337 6
 -5 -4 10 2888.85 552.213 9
 -5 4 -10 3163.87 550.67 5
 -5 4 -10 2963.74 523.384 12
 5 -4 -10 2392.77 470.634 7
 -5 -4 11 7011.49 819.616 6
 -5 -4 11 6257.66 826.233 9
 5 -4 -11 5428.59 695.671 7
 -5 4 -11 5024.31 983.055 11
 5 -4 -12 6807.78 765.747 7
 -5 4 -12 5994.75 853.253 11
 -5 -4 12 6644.45 758.447 6
 5 -4 -13 7678.11 768.237 7
 -5 4 -13 6890.51 872.798 11
 -5 -4 13 8861.05 837.396 6
 -5 -4 14 2505.95 436.582 6
 -5 4 -14 3074.22 527.235 3
 5 -4 -14 1980.35 427.068 7
 -5 4 -14 3474.79 559.269 11
 -5 -4 15 2231.03 330.63 6
 -5 4 -15 2414.47 446.59 3
 5 -4 -15 2057.47 383.109 7
 -5 4 -15 2700.26 447.911 11
 -5 4 -16 381.281 255.966 3
 5 -4 -16 529.619 212.052 7
 -5 4 -16 498.278 232.979 11
 -5 4 -17 776.14 223.005 3
 5 -4 -17 578.651 174.52 7
 -5 -5 -17 6524.65 514.25 10
 5 5 -16 3481.65 408.262 7
 -5 5 16 3207.71 337.136 4
 -5 -5 -16 3194.72 444.317 10
 5 5 -16 3730.7 401.995 10
 -5 -5 -15 4954.2 592.071 10
 5 5 -15 4296.73 521.335 7
 -5 -5 -15 3865.07 488.825 11
 -5 5 15 5035.89 493.344 4
 5 5 -15 5117.82 532.408 10
 5 5 -14 5187.59 630.757 7
 -5 -5 -14 7466.42 724.695 11
 -5 -5 -14 7229.13 760.824 10
 -5 5 14 5944.4 604.947 4
 5 5 -13 9414.99 881.087 7
 -5 5 13 8757.45 800.113 4
 -5 -5 -13 10089.7 926.52 11
 -5 -5 -13 11683 1030.64 10
 -5 5 12 2013.84 481.389 4
 5 5 -12 2163.16 464.113 7
 -5 -5 -12 2766.05 549.738 11
 -5 -5 -12 3598.26 638.078 10
 -5 5 11 4051.66 623.984 4
 5 5 -11 4309.94 630.949 7
 -5 -5 -11 4110.39 688.907 11
 -5 -5 -11 4997.51 754.556 10
 5 5 -10 5377.04 695.292 7
 -5 -5 -10 5957.8 921.15 11
 -5 5 10 5026.49 697.692 4
 -5 -5 -10 6031.6 820.985 10
 5 5 -9 4658.43 626.408 7
 -5 5 9 4630.3 670.087 4
 -5 -5 -9 4353.17 746.269 11
 -5 -5 -9 5317.96 786.632 10
 -5 5 8 6046.97 652.051 6
 5 5 -8 5863.7 725.469 7
 -5 5 8 6569.17 794.654 4
 -5 -5 -8 8375.38 968.526 11
 -5 -5 -8 8978.32 984.703 10
 -5 -5 -7 21824.1 1587.6 11
 -5 -5 -7 22610.8 2709.86 2
 -5 5 7 21128.7 1458.64 4
 -5 5 7 21617.9 1300.67 6
 -5 -5 -7 24921 1615.66 10
 -5 -5 -6 8566.21 1622.79 2
 -5 5 6 13348.6 1103.2 4
 -5 -5 -6 11856.1 1150.3 11
 -5 -5 -6 11803.6 1117.49 10
 -5 5 6 13430.2 995.908 6
 -5 -5 -5 3828.34 1214.09 2
 -5 5 5 5119.97 702.88 4
 -5 -5 -5 4577.07 749.977 11
 -5 5 5 4647.1 589.754 6
 -5 -5 -5 3772.3 675.845 10
 -5 5 4 1408.47 403.375 4
 -5 5 4 1727.32 384.113 6
 -5 -5 -4 1633.24 905.511 2
 -5 -5 -4 2806.45 564.671 11
 -5 -5 -4 3017.88 596.113 10
 -5 5 3 14051.1 1121.42 4
 -5 -5 -3 13069.4 1141.51 11
 -5 -5 -3 12171.7 1099.26 10
 -5 5 3 15291.8 1066.38 6
 -5 5 2 13040.9 2013.79 2
 5 -5 2 10221.4 1659.38 1
 -5 5 2 14172 1105.63 4
 -5 -5 -2 13025.6 1118.69 11
 -5 5 2 15770.8 1071.3 6
 -5 -5 -2 13495.3 1162.86 10
 -5 5 1 13672.8 2101.16 2
 -5 -5 -1 14932.3 1246.22 10
 -5 5 1 14338.4 1102.97 4
 -5 5 1 13204.2 996.892 6
 -5 -5 -1 16343.1 1224.31 11
 -5 5 0 5471.88 611.197 6
 -5 -5 0 3296.93 531.708 6
 -5 5 0 4742.17 1260.36 2
 -5 5 0 4459.8 621.079 4
 -5 -5 0 3925.6 608.056 11
 -5 -5 0 3908.03 662.511 10
 -5 -5 1 14198.2 1140.64 6
 -5 5 -1 14487 2224.1 2
 -5 5 -1 15516.5 1065.3 6
 -5 5 -1 16049.7 1172.38 4
 -5 -5 1 14666.4 1246.82 10
 -5 -5 2 15038.6 1188.38 6
 -5 5 -2 15019.1 2308.11 2
 -5 5 -2 12873.1 1070.54 4
 -5 5 -2 13487.9 1010.38 6
 -5 -5 3 14590.6 1199.57 6
 -5 -5 3 12819.2 1045.18 9
 -5 5 -3 12222.7 2141.15 2
 -5 5 -3 12802.1 1078.97 4
 -5 5 -3 14942.9 1062.38 6
 -5 5 -4 1703.55 360.704 6
 -5 5 -4 809.13 981.176 2
 -5 -5 4 738.14 374.67 6
 -5 -5 4 1006.66 363.742 9
 -5 5 -4 2067.71 436.718 5
 -5 5 -4 1769.04 449.015 4
 -5 5 -5 3054.78 1199.84 2
 -5 -5 5 3433.2 634.899 6
 -5 -5 5 4296.75 645.613 9
 -5 5 -5 3609.52 553.143 5
 -5 5 -5 3352.35 534.692 12
 -5 5 -5 3780.32 533.732 6
 -5 5 -5 3555.37 577.538 4
 -5 -5 6 13116.1 1179.56 6
 -5 5 -6 11782.9 2158.25 2
 -5 -5 6 11185.4 1031.37 9
 -5 5 -6 11286.1 955.572 5
 -5 5 -6 11170.1 1057.94 4
 -5 5 -6 10914.3 915.098 12
 -5 -5 7 20362.6 1522.99 6
 -5 5 -7 20863.3 2891.11 2
 -5 -5 7 18820 1417.71 9
 -5 5 -7 24092.4 1416.46 5
 -5 5 -7 22861.2 1570.24 4
 5 -5 -7 20780.1 1367.36 7
 -5 5 -7 23489.2 1361.64 12
 -5 -5 8 7235.52 904.573 6
 -5 -5 8 5575.33 868.329 9
 -5 5 -8 8806.58 856.071 5
 -5 5 -8 8698.6 994.13 4
 5 -5 -8 6106.66 724.858 7
 -5 5 -8 9131.24 843.831 12
 -5 -5 9 4033.15 680.013 6
 -5 -5 9 4232.84 712.245 9
 -5 5 -9 3128.93 556.962 5
 -5 5 -9 3749.28 692.57 4
 5 -5 -9 3947.96 575.617 7
 -5 5 -9 3457.32 544.337 12
 -5 -5 10 5723.14 803.038 6
 -5 -5 10 6367.48 842.519 9
 -5 5 -10 5066.09 674.602 5
 5 -5 -10 5750.01 689.348 7
 -5 -5 11 4416.81 698.248 6
 -5 -5 11 5579.34 805.208 9
 5 -5 -11 4767.1 635.541 7
 -5 -5 12 2393.24 502.283 6
 5 -5 -12 2126.25 444.11 7
 -5 5 -12 2397.98 576.323 11
 5 -5 -13 10154.5 873.597 7
 -5 5 -13 9565.64 958.092 11
 -5 -5 13 9407.64 855.252 6
 -5 5 -14 6058.67 683.864 3
 5 -5 -14 6940.57 672.917 7
 -5 5 -14 6033.39 676.347 11
 -5 -5 14 6649.32 648.118 6
 -5 5 -15 4258.91 520.004 3
 5 -5 -15 4080.68 480.686 7
 -5 5 -15 3476.16 469.923 11
 -5 -5 15 4268.42 442.965 6
 -5 5 -16 2987.89 404.413 3
 5 -5 -16 3652.39 401.572 7
 -5 5 -17 5467.23 420.213 3
 5 6 -16 -79.4427 129.349 10
 5 6 -16 -119.222 124.257 7
 -5 -6 -16 399.135 182.813 10
 5 6 -15 2045.77 331.237 10
 -5 6 15 2454.34 334.409 4
 5 6 -15 1947.41 329.24 7
 -5 -6 -15 1980.47 377.32 10
 5 6 -14 8131.55 732.215 7
 -5 -6 -14 7978.37 722.376 11
 -5 6 14 7848.11 681.102 4
 -5 -6 -14 9307.25 811.499 10
 5 6 -14 9855.43 731.953 10
 -5 6 13 900.494 304.48 4
 -5 -6 -13 795.369 357.79 10
 -5 -6 -13 693.233 343.243 11
 5 6 -13 887.6 321.29 7
 -5 6 12 415.74 279.74 4
 5 6 -12 669.003 320.859 7
 -5 -6 -12 1275.54 403.65 11
 -5 -6 -12 2069.79 474.144 10
 -5 -6 -11 18970.6 1367.21 10
 5 6 -11 16820 1238.61 7
 -5 -6 -11 17540.2 1341.53 11
 -5 6 11 17664.6 1248.65 4
 -5 6 10 8668.61 1487.33 4
 5 6 -10 8391.12 872.651 7
 -5 -6 -10 7126.51 887.378 11
 -5 -6 -10 9920.76 995.805 10
 -5 6 9 872.321 365.342 4
 5 6 -9 1367.97 385.913 7
 -5 -6 -9 793.77 474.797 11
 -5 -6 -9 797.802 711.192 10
 -5 -6 -8 40003.9 2193.8 10
 5 6 -8 36131.1 2001.79 7
 -5 6 8 42157.9 2149.78 4
 -5 -6 -8 38268.1 2196.3 11
 -5 6 7 244.328 293.989 4
 -5 6 7 438.017 239.043 6
 -5 -6 -7 209.63 339.108 11
 -5 -6 -7 186.143 395.93 10
 -5 6 6 2025.85 495.529 4
 -5 6 6 1605.48 372.84 6
 5 -6 6 3591.44 1206.63 1
 -5 -6 -6 1364.01 764.034 2
 -5 -6 -6 2582.57 571.725 11
 -5 -6 -6 2829.4 601.085 10
 -5 6 5 2722.97 562.986 4
 -5 -6 -5 4831.68 775.043 11
 -5 6 5 4296.45 558.834 6
 5 -6 5 5920.3 1578.39 1
 -5 -6 -5 4482.3 694.329 10
 5 -6 4 16076.7 2323.26 1
 -5 6 4 14452.6 1052.18 6
 -5 6 4 15300.6 1209.06 4
 -5 -6 -4 15969.1 1342.2 11
 -5 -6 -4 17691.8 1339.43 10
 5 -6 3 8604.94 1576.07 1
 -5 6 3 14139.3 2167.76 2
 -5 6 3 13597.5 1104.85 4
 -5 -6 -3 11175.4 1105.72 11
 -5 6 3 12501.6 972.018 6
 -5 -6 -3 11922.8 1095.42 10
 -5 6 2 6175.83 1624.97 2
 -5 6 2 4650.64 658.569 4
 -5 -6 -2 4244.82 682.142 11
 -5 6 2 6111.4 658.939 6
 -5 -6 -2 4923.58 709.989 10
 -5 6 1 7087.39 1655.67 2
 -5 6 1 9183.07 906.883 4
 -5 -6 -1 10218 1017.8 11
 -5 6 1 8993.11 824.621 6
 -5 -6 -1 7978.69 944.9 10
 -5 -6 0 24865.8 1490.88 9
 -5 6 0 28363 3222.21 2
 -5 6 0 25173.4 1568.4 4
 -5 -6 0 24184.9 1578.2 11
 -5 6 0 24451.8 1446.34 6
 -5 -6 0 25455.6 1668.61 10
 -5 -6 1 10765 1014.62 6
 -5 -6 1 8492.81 860.293 9
 -5 6 -1 9710.03 1827.89 2
 -5 6 -1 11175.1 1012.35 4
 -5 -6 1 8937.55 927.226 11
 -5 6 -1 12053.4 971.103 6
 -5 -6 1 11162.2 1102.33 10
 -5 -6 2 6380.44 786.18 6
 -5 -6 2 5088.29 669.269 9
 -5 6 -2 6809.23 1658.98 2
 -5 6 -2 4856.35 690.163 4
 -5 6 -2 3396.95 542.439 6
 -5 -6 3 10069.4 1042.89 6
 -5 -6 3 10366.5 981.801 9
 -5 6 -3 8824.35 2045.73 2
 -5 6 -3 10256.5 897.393 5
 -5 6 -3 9334.19 975.187 4
 -5 6 -3 12103.4 963.808 6
 -5 -6 4 15639.3 1317.85 6
 -5 6 -4 14167 2486.02 2
 -5 -6 4 13853.4 1185.64 9
 -5 6 -4 16847.5 1163.32 5
 -5 6 -4 16962 1317.9 4
 -5 6 -4 17948.9 1197.93 6
 -5 -6 5 4359.23 733.39 6
 -5 6 -5 6579.76 1806.57 2
 -5 -6 5 4670.08 690.826 9
 -5 6 -5 4311.96 608.192 5
 -5 6 -5 5297.63 747.764 4
 -5 6 -5 4283.82 587.714 12
 -5 6 -6 3841.53 1515.47 2
 -5 -6 6 2047.39 542.856 6
 -5 -6 6 1965.86 513.52 9
 -5 6 -6 1762.21 424.148 5
 -5 6 -6 2378.39 484.53 12
 -5 6 -6 1933.41 528.961 4
 -5 -6 7 -99.716 322.306 6
 -5 6 -7 56.183 254.25 12
 -5 -6 7 475.249 339.512 9
 -5 6 -7 895.377 326.798 5
 5 -6 -7 -74.186 291.96 7
 -5 6 -7 261.412 363.914 4
 -5 -6 8 37282.4 2135.02 6
 -5 -6 8 40313.4 2194.87 9
 -5 6 -8 37262.5 1852.06 12
 -5 6 -8 36950.8 1897.02 5
 -5 6 -8 37884.6 2167.78 4
 5 -6 -8 37961.1 1967.17 7
 -5 -6 9 1256.12 392.525 6
 -5 -6 9 1650.26 513.153 9
 5 -6 -9 777.019 292.199 7
 -5 6 -9 1857.2 479.232 5
 -5 6 -9 1664.51 441.829 12
 -5 6 -9 1747.91 520.534 4
 -5 -6 10 9782.36 996.3 6
 -5 -6 10 8662.98 2244.82 9
 -5 6 -10 8284.64 820.818 5
 5 -6 -10 9409.99 879.412 7
 -5 -6 11 16854.1 1279.44 6
 -5 -6 11 18530.5 1389.43 9
 5 -6 -11 17851.9 1228.73 7
 -5 -6 12 756.382 421.726 9
 -5 -6 12 955.193 410.128 6
 5 -6 -12 1333.6 326.916 7
 -5 6 -12 929.497 393.029 11
 -5 -6 13 1007.74 325.772 6
 5 -6 -13 709.812 291.97 7
 -5 6 -13 112.422 207.728 11
 -5 6 -14 9655.66 795.734 3
 5 -6 -14 8592.49 717.091 7
 -5 6 -14 8023.14 754.149 11
 -5 -6 14 8333.03 694.852 6
 -5 -6 15 1949.01 282.155 6
 -5 6 -15 2068.24 364.75 3
 5 -6 -15 1892.66 319.876 7
 -5 6 -15 1944.01 341.723 11
 -5 6 -16 173.805 160.237 3
 5 -6 -16 56.5214 127.915 7
 -5 7 15 2063.56 288.058 4
 5 7 -15 2433.9 309.539 7
 -5 -7 -15 2282.01 327.156 10
 -5 7 14 1594.33 294.688 4
 5 7 -14 1642.76 283.415 10
 5 7 -14 1090.42 294.653 7
 -5 -7 -14 1618.61 319.792 11
 -5 -7 -14 1322.58 328.602 10
 5 7 -13 25671.7 1371.63 7
 -5 7 13 24945.2 1325.71 4
 -5 -7 -13 26890.3 1426.6 11
 -5 -7 -13 24312.7 1367.92 10
 -5 -7 -12 7587.19 783.92 10
 5 7 -12 6718.47 700.281 7
 -5 7 12 6497.37 675.067 4
 -5 -7 -12 7417.86 799.647 11
 -5 7 11 2223.8 476.258 4
 5 7 -11 2260.63 448.767 7
 -5 -7 -11 1852.22 499.291 11
 -5 -7 -11 1874.97 482.041 10
 -5 7 10 1793.57 454.868 4
 5 7 -10 2058.36 449.666 7
 -5 -7 -10 1363.29 485.22 11
 -5 -7 -10 1807.93 483.248 10
 -5 -7 -9 33218.4 1890.85 10
 5 7 -9 28181.8 1683.86 7
 -5 7 9 30971.4 1777.31 4
 -5 -7 -9 33087.1 1947.07 11
 -5 7 8 2171.08 498.728 4
 -5 -7 -8 2246.34 607.18 11
 5 7 -8 2333.8 487.464 7
 -5 -7 -8 2921.7 612.606 10
 -5 7 7 7916.33 892.337 4
 -5 -7 -7 6286.55 907.406 11
 -5 -7 -7 7813.15 919.432 10
 -5 7 7 9802.95 788.159 6
 -5 7 6 1653.12 434.048 4
 -5 7 6 1651.48 354.863 6
 -5 -7 -6 2419.96 593.217 11
 -5 -7 -6 2009.32 534.657 10
 -5 7 5 50554.9 2461.29 4
 -5 -7 -5 52787.2 2678.86 11
 -5 7 5 48873.4 2204.02 6
 -5 -7 -5 50225.5 2522.16 10
 -5 -7 -4 41806.8 2050.35 9
 -5 7 4 44155.5 2242.2 4
 -5 -7 -4 44787.9 2440.85 11
 -5 7 4 46195.5 2092.56 6
 -5 -7 -4 43266.4 2302.68 10
 -5 -7 -3 87027.9 3414.18 9
 -5 7 3 94532.7 3661.52 4
 -5 -7 -3 85761.8 3754.53 11
 -5 7 3 96044.5 3476.47 6
 -5 -7 -3 90143.5 3711.46 10
 -5 7 2 669.895 328.218 6
 -5 7 2 311.453 787.286 2
 -5 -7 -2 404.224 321.985 9
 -5 -7 -2 871.105 413.344 11
 -5 -7 -2 83.663 398.158 10
 -5 7 2 494.536 405.289 4
 -5 -7 -1 41713.8 2087.09 9
 -5 7 1 37219.7 3936.53 2
 -5 7 1 43536.6 2224.25 4
 -5 -7 -1 45749.5 2379.69 11
 -5 7 1 41849 2061.33 6
 -5 -7 -1 45884.6 2330.63 10
 -5 -7 0 34869.3 1886.99 9
 -5 7 0 34517.6 3860.87 2
 -5 7 0 36320.1 1997.76 4
 -5 -7 0 36256.3 2047.86 11
 -5 7 0 36288.4 1857.53 6
 -5 -7 0 36954.9 2071.17 10
 -5 -7 1 46744.2 2340.12 6
 -5 -7 1 41849.3 2180.68 9
 -5 7 -1 46846.4 4516.42 2
 -5 7 -1 49582.6 2361.22 4
 -5 -7 1 45300.9 2319.39 11
 -5 7 -1 49111.4 2222.59 6
 -5 7 -2 -621.748 778.929 2
 -5 -7 2 -275.736 282.957 6
 -5 -7 2 -130.419 235.253 9
 -5 7 -2 548.653 301.404 6
 -5 7 -2 170.682 301.274 4
 -5 -7 3 88228.7 3641.94 6
 -5 -7 3 90385.3 3511.87 9
 -5 7 -3 81718.8 6158.54 2
 -5 7 -3 79490.8 3221.54 5
 -5 7 -3 82988.4 3484.42 4
 -5 -7 4 44439.6 2368.92 6
 -5 -7 4 42489.3 2207.27 9
 -5 7 -4 40886.4 1946.54 12
 -5 7 -4 41227.3 2017.48 5
 -5 7 -4 42140.8 2211.61 4
 -5 -7 5 49121.9 2625.12 6
 -5 -7 5 50399.7 2496.89 9
 -5 7 -5 52681.6 2334.1 5
 -5 7 -5 53774.9 2571.82 4
 -5 7 -5 51964 2241.24 12
 -5 -7 6 1948.7 561.199 6
 -5 -7 6 1161.57 469.127 9
 -5 7 -6 2196.25 464.409 5
 -5 7 -6 1785.3 404.816 12
 -5 7 -6 2177.77 532.678 4
 -5 -7 7 7610.11 921.348 6
 -5 -7 7 9741.23 1012.27 9
 -5 7 -7 6383.91 719.723 5
 -5 7 -7 7609.48 928.891 4
 5 -7 -7 6990.48 773.559 7
 -5 7 -7 7282.51 722.801 12
 -5 -7 8 2168.68 544.102 6
 -5 -7 8 2660.6 602.438 9
 -5 7 -8 2539.75 497.836 5
 5 -7 -8 2889.27 484.733 7
 -5 7 -8 2110.41 446.229 12
 -5 7 -8 2611.58 577.193 4
 -5 -7 9 30988.3 1836.61 6
 -5 -7 9 30325.2 1870.87 9
 -5 7 -9 32901.9 1690.49 5
 -5 7 -9 33340.5 1882.91 4
 5 -7 -9 28618.6 1659.97 7
 -5 -7 10 2185.87 516.908 6
 -5 -7 10 2216.58 538.399 9
 -5 7 -10 2680 485.962 5
 5 -7 -10 2810.85 490.973 7
 -5 -7 11 2475.6 511.913 6
 -5 -7 11 2701.77 595.07 9
 5 -7 -11 2549.37 461.019 7
 -5 -7 12 6107.07 686.43 6
 -5 -7 12 7321.5 818.052 9
 5 -7 -12 7134.44 698.955 7
 -5 7 -12 7110.27 808.334 11
 5 -7 -13 25825 1328.52 7
 -5 7 -13 23966.2 1406.76 11
 -5 -7 13 24879.3 1339 6
 -5 -7 14 1177.16 271.333 6
 -5 7 -14 1602.95 338.595 3
 5 -7 -14 1543.9 314.311 7
 -5 7 -14 2045.25 356.923 11
 5 -7 -15 2895.04 334.399 7
 -5 7 -15 2155.81 330.139 3
 5 8 -14 4100.45 392.392 7
 -5 8 14 5019.73 438.787 4
 -5 -8 -14 3162.24 354.012 10
 -5 8 13 1309.15 282.983 4
 5 8 -13 892.244 187.656 10
 5 8 -13 1478.88 281.082 7
 -5 -8 -13 924.564 272.284 10
 5 8 -12 9074.95 753.204 7
 -5 8 12 10565.6 796.547 4
 -5 -8 -12 9834.23 827.64 11
 -5 -8 -12 7867.22 705.409 10
 5 8 -11 4929.61 602.228 7
 -5 -8 -11 5718.18 695.161 11
 -5 8 11 5383.31 632.57 4
 -5 -8 -11 5999.08 642.364 10
 -5 -8 -10 7086.77 753.903 10
 5 8 -10 6599.06 725.405 7
 -5 -8 -10 6868.79 814.312 11
 -5 8 10 7400.52 767.185 4
 -5 8 9 3194.9 543.322 4
 5 8 -9 3558.62 538.348 7
 -5 -8 -9 3423.48 656.854 11
 -5 -8 -9 4643.04 663.659 10
 5 8 -8 13655 1112.85 7
 -5 8 8 18245.4 1287.49 4
 -5 -8 -8 17335.1 1383.69 11
 -5 -8 -8 19223 1327.2 10
 -5 8 7 2647.56 549.195 4
 -5 -8 -7 3701.61 553.195 9
 -5 -8 -7 3278.46 674.256 11
 -5 -8 -7 3644.51 646.933 10
 -5 -8 -6 36509.8 1869.07 9
 -5 8 6 40550.3 1812.79 6
 -5 8 6 35687 1998.26 4
 -5 -8 -6 39643.4 2236.75 11
 -5 -8 -6 39297.6 2105.06 10
 -5 -8 -5 16200.4 1153.6 9
 -5 8 5 17169.1 1298.44 4
 -5 -8 -5 15359.9 1364.69 11
 -5 8 5 15117.7 1044.31 6
 -5 -8 -5 16573.8 1289.56 10
 -5 -8 -4 17955.5 1266.86 9
 -5 8 4 22115.4 1482.91 4
 -5 -8 -4 21162.2 1602.31 11
 -5 8 4 21934.3 1292.72 6
 -5 -8 -4 21156.9 1481.91 10
 -5 -8 -3 10772.3 961.22 9
 -5 -8 -3 12395.9 1129.24 10
 -5 8 3 9999.77 984.219 4
 -5 -8 -3 11576.8 1170.81 11
 -5 8 3 9404.28 856.82 6
 -5 -8 -2 85574.3 3341.82 9
 -5 8 2 80275.6 3383.9 4
 -5 -8 -2 85722.5 3638.19 11
 -5 8 2 84203 3226.14 6
 -5 -8 -2 81190.3 3455.24 10
 -5 -8 -1 19706.4 1355.22 9
 -5 8 1 20107.1 1407.41 4
 -5 -8 -1 20774.2 1525.27 11
 -5 8 1 19628.4 1288.19 6
 -5 -8 -1 19219.4 1423.56 10
 -5 -8 0 70757 3010.97 9
 -5 8 0 72103.7 3096.67 4
 -5 -8 0 72980.6 3205.32 11
 -5 -8 1 19978.9 1389.05 6
 -5 -8 1 18231.2 1343.26 9
 -5 8 -1 19183.5 1396.16 4
 -5 -8 2 87768.7 3565.96 6
 -5 -8 2 83837.2 3423.5 9
 -5 8 -2 83314.1 3241.75 5
 -5 8 -2 82359.5 3449.78 4
 -5 -8 3 10480 1074.42 6
 -5 -8 3 8893.22 948.488 9
 -5 8 -3 11325.2 954.68 5
 -5 8 -3 11601.4 1067.16 4
 -5 8 -3 12120 924.049 12
 -5 -8 4 23485.9 1617.92 6
 -5 -8 4 20143 1457.6 9
 -5 8 -4 20001 1287.89 5
 -5 8 -4 21497.7 1487.6 4
 -5 8 -4 18466.7 1171.81 12
 -5 -8 5 16054 1307.57 6
 -5 -8 5 14852.8 1248.89 9
 -5 8 -5 15259.8 1114.09 5
 -5 8 -5 18238.5 1361.34 4
 -5 8 -5 15166.5 1029.27 12
 -5 -8 6 37535.1 2111.15 6
 -5 -8 6 37250 2078.73 9
 -5 8 -6 39047 1886.09 5
 5 -8 -6 31884.9 1818.29 7
 -5 8 -6 40756.1 2117.35 4
 -5 8 -6 41444.3 1808.41 12
 -5 -8 7 2993.29 618.931 6
 -5 -8 7 3490.85 615.733 9
 -5 8 -7 4057.94 590.253 5
 5 -8 -7 3326.57 558.959 7
 -5 8 -7 3596.71 482.773 12
 -5 8 -7 3681.97 656.674 4
 -5 -8 8 17014.3 1304.46 6
 -5 -8 8 17250 1334 9
 -5 8 -8 17677.4 1145.65 5
 -5 8 -8 15755 1267.04 4
 5 -8 -8 16837.8 1185.95 7
 -5 -8 9 2862.11 576.417 6
 -5 -8 9 3748.39 656.976 9
 -5 8 -9 3681.39 535.538 5
 -5 8 -9 4301.41 656.369 4
 5 -8 -9 3325.96 524.641 7
 -5 -8 10 7177.33 780.854 6
 -5 -8 10 7552.01 830.022 9
 5 -8 -10 6200.23 672.247 7
 -5 -8 11 5415.44 665.225 6
 -5 -8 11 5298.06 692.47 9
 5 -8 -11 5263.82 599.591 7
 -5 -8 12 10157.4 823.453 6
 -5 -8 12 11391.2 911.796 9
 5 -8 -12 9789.61 763.765 7
 -5 8 -12 9970.94 868.271 11
 -5 -8 13 976.4 270.668 6
 5 -8 -13 1004.68 246.26 7
 -5 8 -13 1138.57 314.187 11
 -5 8 -14 4067.18 431.533 3
 5 -8 -14 4148.52 391.008 7
 -5 8 -14 3391.4 383.612 11
 -5 -8 14 3688.42 373.564 6
 -5 9 13 2721 327.249 4
 5 9 -12 4988.11 460.019 7
 -5 9 12 5055.42 494.982 4
 -5 -9 -12 3220.76 380.493 10
 5 9 -11 4077.69 472.182 7
 -5 9 11 4046.55 493.181 4
 -5 -9 -11 2168.92 383.298 10
 5 9 -10 5967.29 603.685 7
 -5 9 10 5637.85 622.361 4
 -5 -9 -10 4548.31 563.358 10
 -5 9 9 1181.13 355.392 4
 5 9 -9 1118.07 325.13 7
 -5 -9 -9 1227.14 432.316 11
 -5 -9 -9 300.496 258.36 10
 -5 -9 -8 8082.21 713.132 9
 5 9 -8 6153.71 701.587 7
 -5 -9 -8 7814.76 893.914 11
 -5 9 8 7645.16 796.459 4
 -5 -9 -8 6743.79 728.993 10
 -5 -9 -7 3976.92 525.077 9
 -5 9 7 4463.91 639.88 4
 -5 -9 -7 2819.27 614.586 11
 -5 -9 -7 4072.29 599.247 10
 -5 9 6 3451.25 610.47 4
 -5 -9 -6 2353.69 448.695 9
 -5 -9 -6 2179.38 627.535 11
 -5 -9 -6 3975.72 624.148 10
 -5 9 5 1310.84 417.815 4
 -5 -9 -5 948.457 324.158 9
 -5 -9 -5 289.752 335.282 11
 -5 -9 -5 946.669 422.075 10
 -5 -9 -4 1853.28 439.186 9
 -5 -9 -4 2433.67 573.7 11
 -5 -9 -4 2362.15 520.003 10
 -5 9 4 2989.4 565.576 4
 -5 -9 -3 21630.6 1417.04 9
 -5 9 3 22949.3 1496.62 4
 -5 -9 -3 22496.5 1641.27 11
 -5 -9 -3 27367.5 1624.54 10
 -5 -9 -2 1965.06 464.773 9
 -5 9 2 2794.5 558.704 4
 -5 -9 -1 6347.35 766.428 9
 -5 9 1 5731.77 729.822 4
 -5 -9 0 20855.7 1411.59 9
 -5 9 0 22877.1 1492.64 4
 -5 -9 1 5516.06 727.239 9
 -5 9 -1 7660.43 751.287 5
 -5 9 -1 5869.68 765.387 4
 -5 9 -1 6098.33 602.905 12
 -5 -9 2 2584.1 509.196 6
 -5 -9 2 2543.12 537.95 9
 -5 9 -2 3244.85 511.837 5
 -5 9 -2 2969.9 447.22 12
 -5 9 -2 2389.05 531.33 4
 -5 -9 3 26114.6 1648.51 6
 -5 -9 3 24981.8 1585.59 9
 -5 9 -3 24516.9 1415.24 5
 -5 9 -3 25313.2 1601.88 4
 -5 9 -3 25990.7 1325.25 12
 -5 -9 4 3356.31 554.934 6
 -5 -9 4 3338.68 1407.5 9
 -5 9 -4 2838.83 491.289 5
 -5 9 -4 3162.46 437.416 12
 -5 9 -4 3321.83 632.795 4
 -5 -9 5 277.042 275.716 6
 -5 -9 5 840.834 399.731 9
 -5 9 -5 824.725 299.885 5
 -5 9 -5 182.543 231.638 12
 -5 9 -5 996.466 415.953 4
 -5 -9 6 2913.75 557.073 6
 -5 -9 6 2207.47 532.867 9
 -5 9 -6 3162.64 481.195 5
 -5 9 -6 2854.65 412.326 12
 -5 9 -6 2646.74 547.24 4
 -5 -9 7 4373.27 627.63 6
 -5 -9 7 4580.8 674.171 9
 -5 9 -7 5382.27 608.375 5
 -5 9 -7 5010.12 702.14 4
 5 -9 -7 4136.71 561.679 7
 -5 -9 8 7019.61 783.252 6
 -5 -9 8 7992.74 851.494 9
 -5 9 -8 6712.21 660.979 5
 -5 9 -8 9287.74 874.63 4
 5 -9 -8 6420.47 688.13 7
 -5 -9 9 799.828 359.447 6
 -5 -9 9 777.78 352.657 9
 5 -9 -9 505.154 237.547 7
 -5 -9 10 5530.28 611.91 6
 -5 -9 10 4371.72 605.256 9
 5 -9 -10 5112.64 567.089 7
 -5 -9 11 4137.14 513.011 6
 -5 -9 11 3796.1 533.021 9
 5 -9 -11 2971.49 404.603 7
 5 -9 -12 4701.23 459.739 7
 -5 9 -12 4586.22 512.955 11
 -5 -9 12 4571.26 478.083 6
 -5 9 -13 2447.07 321.148 3
 -5 9 -13 2363.21 321.598 11
 -5 -9 13 2062.3 297.37 6
 -5 10 12 3390.19 335.651 4
 -5 10 11 274.624 170.944 4
 5 10 -10 855.742 216.966 7
 -5 10 10 1117.71 285.588 4
 5 10 -9 5338.41 515.755 7
 -5 10 9 6391.78 615.645 4
 -5 -10 -8 234.513 238.677 9
 -5 10 8 -2.33986 221.006 4
 -5 -10 -7 1952.1 385.613 9
 -5 10 7 3241.98 500.898 4
 -5 -10 -6 5516.13 615.694 9
 -5 10 6 7313.65 750.913 4
 -5 -10 -5 7074.44 728.199 9
 -5 10 5 7883.36 789.408 4
 -5 -10 -4 4692.8 630.193 9
 -5 10 4 4611.42 631.346 4
 -5 -10 -3 5705.62 687.599 9
 -5 10 3 5348.28 687.342 4
 -5 -10 -2 4157.8 610.257 9
 -5 10 2 3963.97 616.449 4
 -5 -10 -1 81.1174 296.366 9
 -5 10 1 51.9651 211.257 5
 -5 10 1 95.8047 343.012 4
 -5 -10 0 24892.5 1511.14 9
 -5 10 0 25893.2 1367.18 5
 -5 10 0 24615.3 1516.79 4
 -5 -10 1 613.53 363.585 9
 -5 10 -1 572.49 250.38 5
 -5 10 -1 457.913 297.329 4
 -5 -10 2 4000.36 602.469 9
 -5 10 -2 3387.24 496.668 5
 -5 10 -2 3855 591.219 4
 -5 -10 3 4484.5 593.244 6
 -5 -10 3 5081.44 693.835 9
 -5 10 -3 5754.24 597.877 5
 -5 10 -3 5768.04 730.047 4
 -5 -10 4 4486.76 612.074 6
 -5 -10 4 4112.04 637.239 9
 -5 10 -4 4768.85 536.651 5
 -5 10 -4 4598.6 656.722 4
 -5 -10 5 7044.62 764.733 6
 -5 -10 5 7035.23 811.289 9
 -5 10 -5 7835.41 682.995 5
 -5 10 -5 8863.89 846.03 4
 -5 -10 6 4811.24 628.149 6
 -5 -10 6 5781.32 700.842 9
 -5 10 -6 5855.91 584.529 5
 5 -10 -6 4580 517.902 8
 -5 10 -6 6254.15 727.113 4
 -5 -10 7 2088.97 430.373 6
 -5 -10 7 2856.79 525.855 9
 -5 10 -7 2304.45 388.507 5
 -5 10 -7 2956.58 509.718 4
 -5 -10 8 269.535 242.871 6
 -5 -10 8 -215.874 285.743 9
 -5 -10 9 7668.65 689.597 6
 -5 -10 9 7620.09 727.527 9
 -5 -10 10 743.3 285.784 6
 -5 -10 10 788.734 290.618 9
 -5 -10 11 467.991 193.227 6
 -5 -10 11 462.872 209.475 9
 -5 10 -11 164.803 188.163 11
 -5 10 -12 2920.95 330.214 11
 -5 -10 12 3390.24 339.456 6
 -5 11 10 2517.11 302.009 4
 -5 11 9 827.202 225.893 4
 -5 -11 -8 1503.68 261.633 9
 -5 11 8 1410.81 310.579 4
 -5 -11 -7 4974.03 505.94 9
 -5 11 7 5169.73 549.67 4
 -5 -11 -6 9340.16 743.659 9
 -5 11 6 10356.9 792.191 4
 -5 -11 -5 6818.58 650.173 9
 -5 11 5 7576.55 559.143 5
 -5 11 5 9698.41 789.847 4
 -5 -11 -4 1093.53 340.348 9
 -5 11 4 1528.8 276.004 5
 -5 11 4 1715.7 374.366 4
 -5 -11 -3 2137.19 432.994 9
 -5 11 3 3064.52 381.398 5
 -5 11 3 2886.38 475.646 4
 -5 -11 -2 51.9739 241.214 9
 -5 11 2 41.486 184.527 5
 -5 11 2 378.895 282.789 4
 -5 -11 -1 1106.75 365.297 9
 -5 11 1 1112.02 291.787 5
 -5 11 1 1138.49 372.822 4
 -5 -11 0 1299.43 370.981 9
 -5 11 0 1763.34 319.923 5
 -5 11 0 2184.95 426.157 4
 -5 -11 1 701.651 318.113 9
 -5 11 -1 1572.01 288.431 5
 -5 11 -1 1568.33 399.102 4
 -5 -11 2 707.572 329.544 9
 -5 11 -2 426.404 190.649 5
 -5 11 -2 461.698 300.952 4
 -5 -11 3 2418.69 470.035 9
 -5 11 -3 2210.62 357.347 5
 -5 11 -3 2723.58 464.265 4
 -5 -11 4 2018.62 379.711 6
 -5 -11 4 1992.62 425.266 9
 -5 11 -4 1093.91 269.222 5
 -5 11 -4 1550.2 376.95 4
 -5 -11 5 6788.72 632.419 6
 -5 -11 5 8704.43 783.092 9
 -5 11 -5 6273.41 536.133 5
 -5 11 -5 8529.63 760.354 4
 -5 -11 6 8262.62 698.107 6
 -5 -11 6 9423.07 808.208 9
 -5 11 -6 9193.87 624.807 5
 -5 11 -6 10271.2 801.579 4
 -5 -11 7 4096.89 492.306 6
 -5 -11 7 5106.18 582.154 9
 -5 -11 8 909.143 264.474 6
 -5 -11 8 1068.31 300.745 9
 5 -11 -8 1599.18 272.77 8
 -5 -11 9 1234.34 239.272 6
 -5 -11 9 854.617 258.842 9
 -5 -11 10 2109.07 323.05 9
 -5 11 -10 2530.14 334.034 11
 -5 -11 10 2333.2 295.902 6
 -5 12 8 7854.77 507.177 4
 -5 12 7 14000.7 770.73 4
 -5 -12 -6 2902.4 331.6 9
 -5 12 6 3505.26 395.605 4
 -5 -12 -5 13086.3 786.725 9
 -5 12 5 12974.6 813.688 4
 -5 -12 -4 2200.1 343.049 9
 -5 12 4 1889.84 352.744 4
 -5 -12 -3 14266.6 890.64 9
 -5 12 3 13017.9 860.655 4
 -5 -12 -2 6066.67 594.175 9
 -5 12 2 6978.08 623.171 4
 -5 -12 -1 8993.62 737.834 9
 -5 12 1 8548.7 700.551 4
 -5 -12 0 1806.4 388.235 9
 -5 12 0 2258.84 383.017 4
 -5 -12 1 8593.82 725.561 9
 -5 12 -1 7621.33 668.337 4
 -5 -12 2 7299.76 660.487 9
 -5 12 -2 6122.59 598.829 4
 -5 -12 3 14057.5 931.208 9
 -5 12 -3 13973.5 902.184 4
 -5 -12 4 1171.26 312.956 9
 -5 12 -4 1865.15 352.757 4
 -5 -12 5 12022.2 833.982 9
 -5 12 -5 14327.8 842.697 4
 -5 -12 6 3806.26 459.312 9
 -5 -12 6 2629.41 303.425 6
 -5 -12 7 11707.3 739.091 9
 -5 -12 8 8027.88 553.665 9
 -5 13 3 19698 895.062 4
 -5 -13 -2 31384.7 1303.85 9
 -5 13 2 33634.8 1302.84 4
 -5 -13 -1 8258.97 585.37 9
 -5 13 1 8932.86 574.092 4
 -5 -13 0 1297.82 264.541 9
 -5 13 0 703.332 193.562 4
 -5 -13 1 8667.26 607.686 9
 -5 13 -1 8052.81 547.077 4
 -5 -13 2 31415.9 1306.44 9
 -5 13 -2 29674.8 1215.91 4
 -5 -13 3 21292 1006.71 9
 -5 -13 4 3995.81 386.162 9
 -6 0 0 127061 4555.15 10
 -6 0 0 121219 4289.42 6
 -6 0 -1 433.767 214.511 6
 -6 0 1 283.589 276.494 6
 -6 0 -1 1002.73 396.179 10
 -6 0 -2 895.616 307.302 6
 -6 0 2 1817.48 425.478 6
 -6 0 -2 552.689 287.246 11
 -6 0 -2 -424.846 309.124 10
 -6 0 -3 20730.4 1449.77 11
 -6 0 -3 22616.6 1456.27 10
 -6 0 -3 19279.9 1195.4 6
 -6 0 -3 18543.3 2353.31 2
 -6 0 3 19845.1 1343.78 6
 -6 0 -4 43628.4 2044.88 12
 -6 0 -4 48277.2 2386.9 11
 -6 0 -4 45907.6 2271.77 10
 -6 0 -4 47443 3815.74 2
 -6 0 4 48629.7 2286.43 6
 -6 0 -5 4874.73 611.488 12
 -6 0 -5 5748.58 1367.8 2
 -6 0 -5 4431.24 683.684 11
 -6 0 5 5096.91 690.261 6
 -6 0 -5 3920.19 624.057 10
 -6 0 -6 11172.8 894.185 12
 -6 0 -6 12312.3 1153.45 11
 -6 0 -6 11057.3 1914.59 2
 -6 0 -6 10574.5 980.231 10
 -6 0 6 14115.5 1135.47 6
 -6 0 7 -87.5694 287.853 6
 -6 0 -7 654.782 298.476 12
 -6 0 -7 554.548 585.766 2
 -6 0 -7 70.2412 394.899 11
 -6 0 -7 214.083 235.34 10
 -6 0 -8 63579.9 2628.42 12
 -6 0 -8 65423.8 3033.92 11
 -6 0 -8 63173.3 2848.64 10
 -6 0 8 63579.2 2796.41 6
 -6 0 -9 23340.7 1659.08 11
 -6 0 -9 21496.2 1474.83 10
 -6 0 9 22724.6 1470.14 6
 -6 0 -10 5463.81 811.004 11
 -6 0 -10 4843.21 682.055 10
 -6 0 10 4188.75 610.195 6
 -6 0 11 760.229 318.572 6
 -6 0 -11 673.148 422.803 11
 -6 0 -11 926.677 364.232 10
 6 0 -12 13735.8 989.437 7
 -6 0 -12 10835.1 1076.55 11
 -6 0 -12 10676.5 981.588 10
 -6 0 12 14465.3 979.492 6
 6 0 -13 19913.1 1183.11 7
 -6 0 -13 22384 1423.43 11
 -6 0 -13 17877.9 1239.83 10
 -6 0 13 19904.5 1097.72 6
 6 0 -14 382.364 266.166 10
 6 0 -14 -145.768 199.867 7
 -6 0 -14 699.445 332.434 11
 -6 0 -14 -120.518 257.455 10
 6 0 -15 1399.54 297.95 10
 6 0 -15 987.395 268.381 7
 -6 0 -15 2086.19 395.872 11
 -6 0 -15 775.604 273.351 10
 6 0 -16 10508.8 640.706 7
 -6 0 -16 10868.4 686.233 11
 6 0 -16 10786.7 653.981 10
 6 1 -16 5691.96 446.191 7
 -6 -1 -16 6442.03 506.719 11
 -6 -1 -16 5649.6 493.388 10
 6 1 -16 8042.34 560.313 10
 6 1 -15 17145.4 952.554 7
 -6 -1 -15 16018.6 1021.83 11
 -6 -1 -15 15367.9 1004.56 10
 6 1 -15 20536.2 1072.94 10
 6 1 -14 2887.26 425.271 7
 -6 -1 -14 3595.32 540.319 11
 6 1 -14 3261.02 498.928 10
 -6 -1 -14 2758.92 488.251 10
 6 1 -13 5507.99 569.602 7
 -6 -1 -13 4371.26 632.093 11
 -6 -1 -13 3885.41 579.388 10
 6 1 -12 3960.17 533.701 7
 -6 -1 -12 4542.58 701.368 11
 -6 1 12 3720.49 494.157 6
 -6 -1 -12 3474.59 626.918 10
 -6 -1 -11 33933.5 2009.7 11
 -6 -1 -11 34132.7 1979.35 10
 -6 1 11 36567.9 1750.46 6
 -6 -1 -10 4604.77 751.974 11
 -6 -1 -10 5332.84 746.372 10
 -6 1 10 5454.75 653.607 6
 -6 -1 -9 6745.02 916.385 11
 -6 -1 -9 6986.15 837.639 10
 -6 1 9 7708.73 785.528 6
 -6 -1 -8 24908.3 1381.05 12
 -6 -1 -8 23239.5 1656.32 11
 -6 -1 -8 23834.3 1576.74 10
 -6 1 8 22134.4 1446.44 6
 -6 -1 -7 10708.7 867.329 12
 -6 -1 -7 9514.31 2014.56 2
 -6 -1 -7 9742.43 1064.45 11
 -6 -1 -7 10401 1014.85 10
 -6 1 7 11078.8 987.461 6
 -6 -1 -6 14685.3 1017.2 12
 -6 -1 -6 13576.3 2189.41 2
 -6 -1 -6 14160.1 1236 11
 -6 -1 -6 12788.4 1129.94 10
 -6 1 6 14034.4 1126.63 6
 -6 -1 -5 26803.3 1405.05 12
 -6 -1 -5 25532.2 1695.34 11
 -6 -1 -5 23443.8 2666.54 2
 -6 -1 -5 26103.8 1635.53 10
 -6 1 5 22914 1493.33 6
 -6 -1 -4 4907.28 585.529 12
 -6 -1 -4 6793.64 1551.34 2
 -6 -1 -4 4045.45 632.842 11
 -6 -1 -4 5938.2 744.758 10
 -6 1 4 4430.59 642.446 6
 -6 -1 -3 14333 1203.99 11
 -6 -1 -3 16381.6 1250.7 10
 -6 1 3 14949.5 1132.42 6
 -6 -1 -2 8729.42 929.684 11
 -6 -1 -2 12224.5 1091.4 10
 -6 -1 -2 11394 880.46 6
 -6 1 2 11739.4 968.504 6
 -6 -1 -1 26253.3 1654.22 10
 -6 1 1 23978 1439.6 6
 -6 -1 -1 24335.9 1397.97 6
 -6 1 0 3948.19 554.312 6
 -6 -1 0 3850.64 540.612 6
 -6 -1 0 2860.84 621.357 10
 -6 1 -1 23348.9 1374.31 6
 -6 -1 1 24678.5 1463.2 6
 -6 1 -2 9716.14 919.961 11
 -6 1 -2 9829.91 839.811 6
 -6 -1 2 12908.3 1034.36 6
 -6 1 -3 16809.6 1083.25 5
 -6 1 -3 16595.8 1241.01 11
 -6 1 -3 15628.9 1056.91 6
 -6 -1 3 15580.6 1195.14 6
 -6 1 -3 14153.6 2053.23 2
 -6 1 -4 6659.21 668.395 5
 -6 1 -4 5518.62 610.624 6
 -6 1 -4 5443.62 779.963 11
 -6 1 -4 3345.48 1153.78 2
 -6 -1 4 5868.08 738.077 6
 -6 1 -5 25977.1 1394.53 5
 -6 1 -5 24302.4 1432.31 12
 -6 1 -5 24035.2 1661.85 11
 -6 1 -5 24884.3 2836.33 2
 -6 -1 5 23593.3 1559.21 6
 -6 1 -6 14084.7 994.942 5
 -6 1 -6 14567.1 1064.73 12
 -6 1 -6 14041.3 1252.8 11
 -6 1 -6 13823.7 2299.76 2
 -6 -1 6 15008.4 1214.55 6
 -6 1 -7 9633.98 849.632 5
 -6 1 -7 10741.3 911.473 12
 -6 1 -7 11153.2 1131.56 11
 -6 1 -7 11074.4 2088.72 2
 -6 1 -7 9598.5 909.08 10
 -6 -1 7 9839.97 979.991 6
 -6 1 -8 24626.7 1408.7 5
 -6 1 -8 26081.6 1488.97 12
 -6 1 -8 24938.6 1731.9 11
 -6 1 -8 23843.9 1531.42 10
 -6 -1 8 26560.4 1634.06 6
 -6 1 -9 7005.8 713.162 5
 -6 1 -9 8018.82 805.127 12
 -6 1 -9 6409.46 871.865 11
 -6 1 -9 6469.45 771.11 10
 -6 -1 9 8094.5 873.906 6
 -6 1 -10 4852.21 754.733 11
 -6 -1 10 5802.69 718.077 6
 -6 1 -10 4741.69 679.666 10
 -6 1 -11 32762.6 1959.16 11
 -6 1 -11 30008.5 1701.68 10
 -6 -1 11 32377.6 1714.35 6
 6 -1 -12 4043.79 535.527 7
 -6 1 -12 4583.3 699.938 11
 -6 -1 12 4081 556.844 6
 -6 1 -12 3958.59 588.515 10
 6 -1 -13 4709.65 549.507 7
 -6 1 -13 5035.4 679.122 11
 -6 -1 13 5907.48 578.434 6
 6 -1 -13 5518.64 597.762 10
 6 -1 -14 2757.97 403.148 10
 6 -1 -14 2996.6 421.891 7
 -6 1 -14 3830.56 567.679 11
 6 -1 -15 17325.4 947.256 7
 -6 1 -15 16223.5 1024.99 11
 6 -1 -15 16308.3 902.617 10
 6 -1 -16 5426.51 432.066 7
 -6 1 -16 6292.65 503.237 11
 6 -1 -16 5300.13 415.582 10
 -6 -2 -16 4781.18 477.431 10
 6 2 -16 4469.31 436.704 10
 6 2 -15 1902.43 303.984 7
 -6 -2 -15 2017.61 380.867 11
 6 2 -15 2712.28 402.06 10
 -6 -2 -15 2286.64 408.655 10
 6 2 -14 2778.74 408.698 7
 -6 -2 -14 2185.21 444.114 11
 -6 -2 -14 1749.64 429.741 10
 6 2 -13 1393.79 335.547 7
 -6 -2 -13 1163.1 357.231 11
 -6 -2 -13 872.8 394.645 10
 6 2 -12 9063.83 787.478 7
 -6 -2 -12 9463.04 954.149 11
 -6 -2 -12 9887.61 988.627 10
 -6 -2 -11 25326.1 1668.95 11
 -6 -2 -11 26502.4 1705.62 10
 -6 2 11 28158 1433.2 6
 -6 -2 -10 10998.6 1089.37 11
 -6 -2 -10 12454.2 1137.7 10
 -6 2 10 10306.1 883.986 6
 -6 -2 -9 16288.3 1358.96 11
 -6 -2 -9 15439.5 1292.26 10
 -6 2 9 16120.7 1130.11 6
 -6 -2 -8 7352.37 915.66 11
 -6 -2 -8 7699.2 902.652 10
 -6 2 8 8546.78 830.038 6
 -6 -2 -7 48085.7 2480.05 11
 -6 -2 -7 46505.7 2351.53 10
 -6 2 7 42846.7 2143.44 6
 -6 -2 -6 31569 1909.57 11
 -6 -2 -6 24962.6 2855.37 2
 -6 -2 -6 29526.3 1780.34 10
 -6 2 6 27101.5 1616.83 6
 -6 -2 -5 44958.4 2384.45 11
 -6 -2 -5 42790.2 3637.11 2
 -6 -2 -5 43054.6 2266.57 10
 -6 2 5 47801.4 2232.41 6
 -6 -2 -4 55191.7 2697.37 11
 -6 -2 -4 55312.7 2662.64 10
 -6 2 4 63347 2644.52 6
 -6 -2 -3 28325.4 1754.71 11
 -6 -2 -3 31510.3 1847.36 10
 -6 2 3 30054.3 1672.4 6
 -6 -2 -2 33094.9 1875.92 11
 -6 -2 -2 35551.2 1995.76 10
 -6 2 2 33552.3 1790.61 6
 -6 -2 -2 36118.4 1712.51 6
 -6 -2 -1 31907.9 1769.12 11
 -6 -2 -1 30382.7 1873.04 10
 -6 2 1 34662 1762.22 6
 -6 -2 -1 32962.5 1689.19 6
 -6 -2 0 67673 3025.52 10
 -6 2 0 61506.1 2633.1 6
 -6 -2 0 66359.1 2708.73 6
 -6 2 -1 31403.3 1650.57 6
 -6 -2 1 32206 1748.94 6
 -6 2 -2 31144.6 3057.53 2
 -6 2 -2 34917 1897.03 11
 -6 2 -2 33178.1 1684.72 6
 -6 -2 2 28765.1 1705.7 6
 -6 2 -3 34210 3301.4 2
 -6 2 -3 27741.4 1513.91 5
 -6 2 -3 26844 1696.94 11
 -6 2 -3 31340.1 1568.15 6
 -6 -2 3 25106.2 1621.36 6
 -6 2 -4 53077.9 4351.31 2
 -6 2 -4 57171.7 2414.24 5
 -6 2 -4 54726.6 2701.05 11
 -6 2 -4 56912 2364.29 6
 -6 -2 4 62903.6 2747.34 6
 -6 2 -5 42968.7 2047.96 5
 -6 2 -5 43422.6 2102.68 12
 -6 2 -5 44823.7 2413.8 11
 -6 2 -5 50717.1 2087.06 6
 -6 -2 5 50924.2 2424.64 6
 -6 2 -5 45738 4093.89 2
 -6 2 -6 30479.1 1624.5 5
 -6 2 -6 34665.2 1802 4
 -6 2 -6 30504.6 1910.97 11
 -6 2 -6 30928.3 1664.3 12
 -6 2 -6 29292.8 3335.85 2
 -6 -2 6 27646.2 1762.97 6
 -6 2 -7 46240.6 2124.38 5
 -6 2 -7 49858.5 2223.31 12
 -6 2 -7 49283.7 2561.94 11
 -6 -2 7 43822.4 2322.84 6
 -6 2 -8 8328.98 794.204 5
 -6 2 -8 7778.6 814.867 12
 -6 2 -8 7017.39 938.293 11
 -6 -2 8 8743.28 923.114 6
 -6 2 -9 17324.6 1170.93 5
 -6 2 -9 16205.2 1173.89 12
 -6 2 -9 16085.8 1396.29 11
 -6 -2 9 17135.8 1303.87 6
 -6 2 -10 11196.3 1144.13 11
 -6 -2 10 9646.53 939.228 6
 -6 2 -11 23975.6 1433.03 3
 6 -2 -11 25291.6 1423.85 7
 -6 2 -11 25530.8 1727.88 11
 -6 -2 11 28001.7 1588.36 6
 -6 2 -12 9175.31 803.259 3
 6 -2 -12 9713.65 816.74 7
 -6 2 -12 9993.2 1005.58 11
 -6 -2 12 10941.8 895.014 6
 6 -2 -12 8356.78 753.85 10
 6 -2 -13 1312.83 286.701 10
 -6 -2 13 967.798 303.265 6
 -6 2 -13 499.349 274.261 3
 6 -2 -13 848.224 285.088 7
 -6 2 -13 571.159 368.652 11
 6 -2 -14 2386.6 319.883 10
 -6 -2 14 2557.37 345.687 6
 -6 2 -14 2614.31 374.915 3
 6 -2 -14 2373.74 386.446 7
 -6 2 -14 2059.57 409.394 11
 -6 2 -15 1867.59 286.584 3
 6 -2 -15 2812.07 352.432 7
 -6 2 -15 2084.48 381.83 11
 -6 2 -16 3968.42 390.512 11
 6 3 -16 2043.68 280.3 10
 -6 -3 -16 1163.87 247.023 10
 6 3 -15 8069.72 587.744 7
 -6 -3 -15 9393.42 705.866 11
 6 3 -15 10590.2 728.33 10
 -6 -3 -15 9555.43 771.137 10
 6 3 -14 910.309 245.532 7
 -6 -3 -14 1558.05 402.934 11
 -6 -3 -14 1669.14 395.55 10
 6 3 -13 2021.87 361.416 7
 -6 -3 -13 862.588 364.602 11
 -6 -3 -13 783.664 398.334 10
 6 3 -12 9913.25 814.108 7
 -6 -3 -12 11631.1 1041.94 11
 -6 -3 -12 10555.1 1008.83 10
 -6 -3 -11 17743.5 1343.39 11
 -6 -3 -11 18677 1365.5 10
 -6 3 11 15278.1 973.409 6
 -6 -3 -10 9444.19 1027.69 11
 -6 -3 -10 10967.7 1064.27 10
 -6 3 10 11216.9 853.31 6
 -6 -3 -9 11710.2 1158.44 11
 -6 -3 -9 9628.64 1036.54 10
 -6 3 9 13925.3 998.182 6
 -6 -3 -8 5042.55 782.642 11
 -6 -3 -8 4860.28 737.001 10
 -6 3 8 6236.09 702.765 6
 -6 -3 -7 40049.5 2263.99 11
 -6 -3 -7 41500.7 2210.86 10
 -6 3 7 40640.8 2001.5 6
 -6 -3 -6 13139.3 1224.54 11
 -6 -3 -6 13490.6 1173.68 10
 -6 3 6 12452.6 1036.32 6
 -6 -3 -5 53166.3 2663.61 11
 -6 -3 -5 53774.4 2620.48 10
 -6 3 5 56415.8 2473.12 6
 -6 3 4 2139.06 459.16 6
 -6 -3 -4 2119.35 546.682 11
 -6 -3 -4 2298.03 571.987 10
 -6 3 3 2711.42 505.43 6
 -6 -3 -3 3277.81 644.288 11
 -6 -3 -3 4049.55 686.004 10
 -6 -3 -2 5026.58 750.473 11
 -6 -3 -2 7247.44 879.602 10
 -6 3 2 7018.61 746.148 6
 -6 -3 -1 19470.6 1367.75 11
 -6 -3 -1 22746.3 1577.02 10
 -6 3 1 21135.2 1326.22 6
 -6 -3 -1 18882.4 1253.79 6
 -6 3 0 528.355 259.558 6
 -6 -3 0 -44.9446 289.24 6
 -6 -3 0 -45.5754 366.353 10
 -6 3 -1 16245.4 1149.61 6
 -6 -3 1 19459.2 1323.52 6
 -6 3 -1 17122.7 2254.05 2
 -6 3 -2 6168.1 693.983 4
 -6 3 -2 4940.35 702.665 11
 -6 3 -2 6489.78 692.858 6
 -6 -3 2 6719.69 783.943 6
 -6 3 -2 6006.31 1399.95 2
 -6 3 -3 3154.97 494.396 6
 -6 -3 3 2079.59 509.065 6
 -6 3 -3 2738.79 503.907 5
 -6 3 -3 3373.03 598.451 11
 -6 3 -3 3768.15 553.367 4
 -6 3 -3 3323.15 1300.73 2
 -6 3 -4 2129.19 415.716 6
 -6 -3 4 2505.61 512.238 6
 -6 3 -4 2650.25 511.145 5
 -6 3 -4 2039.7 514.431 11
 -6 3 -4 2090.01 477.384 4
 -6 3 -4 1755.63 486.439 2
 -6 3 -5 65073 4986.53 2
 -6 3 -5 56311.2 2444.86 5
 -6 3 -5 53221 2560.55 4
 -6 3 -5 58100.7 2491.65 12
 -6 3 -5 52994.2 2725.4 11
 -6 3 -5 61761.9 2454.75 6
 -6 -3 5 57370 2720.04 6
 -6 3 -6 11554.7 955.211 5
 -6 3 -6 13112.7 1024.99 12
 -6 3 -6 12522.2 1081.35 4
 -6 3 -6 11442.7 1167.63 11
 -6 3 -6 13093.6 938.562 6
 -6 3 -6 14422.2 2462.24 2
 -6 -3 6 10159.9 1057.02 6
 -6 3 -7 37975 1903.49 5
 -6 3 -7 39649.7 2087.95 4
 -6 3 -7 41056.5 1966.96 12
 -6 3 -7 39749.8 2298.38 11
 -6 -3 7 37578.2 2106.04 6
 -6 3 -8 5234.57 663.397 5
 -6 3 -8 5027.8 655.639 12
 -6 3 -8 4345.65 776.413 11
 -6 -3 8 5030.4 723.918 6
 -6 3 -9 11145.6 966.045 5
 -6 3 -9 11434.1 974.425 12
 -6 3 -9 10476.3 1143 11
 -6 -3 9 11873.3 1064.69 6
 -6 3 -10 10667.1 926.726 5
 -6 3 -10 10791.4 1130.87 11
 -6 -3 10 10791.9 1017.44 6
 6 -3 -11 16000.7 1071.91 7
 -6 3 -11 16569.5 1353.57 11
 -6 -3 11 15073 1166.33 6
 -6 3 -12 11644.4 916.511 3
 6 -3 -12 10648.9 857.509 7
 -6 3 -12 13058.4 1140.9 11
 -6 -3 12 12673 980.868 6
 -6 -3 13 973.326 303.591 6
 -6 3 -13 205.197 232.152 3
 6 -3 -13 602.557 232.538 7
 -6 3 -13 445.239 349.616 11
 -6 -3 14 1067.42 243.708 6
 -6 3 -14 1699.31 323.795 3
 6 -3 -14 1359.04 289.888 7
 -6 3 -14 1640.14 383.172 11
 -6 3 -15 7751.52 577.489 3
 6 -3 -15 8857.23 592.798 7
 -6 3 -15 9271.71 701.813 11
 6 4 -16 9.38442 115.68 10
 -6 -4 -16 300.838 165.537 10
 6 4 -15 1145.15 262.837 10
 -6 -4 -15 743.662 230.322 11
 -6 -4 -15 927.233 283.593 10
 6 4 -14 1643.69 280.902 7
 -6 -4 -14 2004.06 400.73 11
 -6 -4 -14 2612.03 446.952 10
 6 4 -13 9874.09 762.005 7
 -6 -4 -13 11099.7 918.993 11
 -6 -4 -13 12553.3 1009.28 10
 6 4 -12 -40.7693 89.5811 7
 -6 -4 -12 90.97 315.299 11
 -6 -4 -12 87.0901 318.277 10
 -6 -4 -11 1139.17 446.473 11
 -6 -4 -11 478.116 412.394 10
 -6 4 10 9580.99 833.123 4
 -6 -4 -10 9746.83 1025.06 11
 -6 4 10 9771.89 765.46 6
 -6 -4 -10 10716 1063.78 10
 -6 4 9 5970.29 684.575 4
 -6 -4 -9 6250.66 860.972 11
 -6 -4 -9 5447.38 779.997 10
 -6 4 9 6528.1 653.719 6
 -6 4 8 1099.05 383.669 4
 -6 4 8 893.298 292.169 6
 -6 -4 -8 990.218 446.389 11
 -6 -4 -8 1392.55 459.57 10
 -6 4 7 18470.2 1289.89 4
 -6 -4 -7 17288.3 1408.31 11
 -6 -4 -7 17009 1332.95 10
 -6 4 7 16533.9 1155.28 6
 -6 4 6 22445.7 1438.26 4
 -6 -4 -6 21356.6 1590.2 11
 -6 -4 -6 23015.3 1588.73 10
 -6 4 6 24166.6 1435.1 6
 -6 4 5 1944.1 424.232 4
 -6 4 5 2270.21 455.727 6
 -6 -4 -5 2692.51 606.402 11
 -6 -4 -5 2603.03 550.424 10
 -6 4 4 6032.88 720.564 4
 -6 -4 -4 4926.83 758.603 11
 -6 -4 -4 5626.74 806.26 10
 -6 4 4 5587.5 679.531 6
 -6 4 3 22406.3 1445.35 4
 -6 -4 -3 20761.4 1511.42 11
 -6 -4 -3 21324 1536.09 10
 -6 4 3 22599.2 1406.17 6
 -6 4 2 17702.2 1267.05 4
 -6 -4 -2 18047.3 1330.86 11
 -6 -4 -2 20323.1 1499.21 10
 -6 4 2 19179.2 1274.54 6
 -6 4 1 28693.4 1690.71 4
 -6 -4 -1 33320.7 1850.84 11
 -6 -4 -1 35899.9 2052.35 10
 -6 4 1 31941.8 1711.37 6
 -6 4 0 10242.7 946.364 4
 -6 -4 0 14473.4 1273.87 10
 -6 4 0 13312.6 1028.76 6
 -6 -4 0 13206.8 1058.86 6
 -6 4 -1 34275.2 3329.32 2
 -6 4 -1 29735.1 1726.71 4
 -6 4 -1 33919.6 1723.52 6
 -6 -4 1 28844 1710.92 6
 -6 4 -2 16565.4 2462.72 2
 -6 4 -2 16303 1230.62 4
 -6 4 -2 17795.4 1195 6
 -6 -4 2 20817.5 1412.57 6
 -6 4 -3 22247.3 2855.59 2
 -6 4 -3 24871.5 1447.55 5
 -6 4 -3 20392.7 1435.13 4
 -6 4 -3 25181.4 1436.28 6
 -6 -4 3 23648.6 1580.72 6
 -6 4 -4 3721.92 559.744 5
 -6 4 -4 4638.49 683.379 4
 -6 4 -4 4637.97 613.364 6
 -6 -4 4 5374.66 756.583 6
 -6 4 -4 5017.88 1338.58 2
 -6 4 -5 2543.86 455.365 6
 -6 -4 5 2319.23 550.012 6
 -6 4 -5 1836.89 445.999 5
 -6 4 -5 1671.54 414.978 12
 -6 4 -5 1826.36 441.31 4
 -6 4 -5 1732.72 1165.36 2
 -6 4 -6 24876.5 1451.29 5
 -6 4 -6 22207.3 1541.17 4
 -6 4 -6 22414.8 1404.32 12
 -6 -4 6 23375.5 1631.15 6
 -6 4 -7 17638.4 1216.7 5
 -6 4 -7 17494.7 1323.61 4
 -6 4 -7 16296.3 1181.34 12
 -6 4 -7 16197.8 1423.68 11
 -6 -4 7 18606.1 1405.51 6
 -6 -4 8 1243.29 500.09 6
 -6 -4 8 624.492 284.039 9
 -6 4 -8 1370.9 389.431 5
 -6 4 -8 1265.17 407.173 12
 -6 4 -8 852.404 490.264 11
 -6 -4 9 5598.41 708.532 9
 -6 4 -9 5277.51 706.951 5
 -6 4 -9 5790.9 700.946 12
 -6 4 -9 4754.91 803.774 11
 -6 -4 9 5399.13 757.138 6
 -6 4 -10 9030.46 850.322 5
 -6 4 -10 9922.93 1083.77 11
 -6 -4 10 9779.94 953.747 6
 -6 -4 11 904.985 362.09 6
 6 -4 -11 536.648 232.565 7
 -6 4 -11 910.246 454.667 11
 -6 -4 12 332.404 257.242 6
 6 -4 -12 269.527 237.369 7
 -6 4 -12 -193.774 316.797 11
 -6 4 -13 8695.25 755.717 3
 6 -4 -13 10569 764.501 7
 -6 4 -13 10912.6 936.121 11
 -6 -4 13 10612.7 801.171 6
 -6 -4 14 1863.16 315.761 6
 -6 4 -14 1485.35 337.699 3
 6 -4 -14 2069.7 311.147 7
 -6 4 -14 1143.52 318.031 11
 -6 4 -15 -82.9548 174.757 3
 6 -4 -15 599.651 186.178 7
 -6 4 -15 784.379 262.05 11
 6 5 -15 1059.31 211.683 10
 -6 -5 -15 1022.17 269.543 10
 -6 -5 -14 3474.48 462.091 11
 -6 -5 -14 4201.91 532.734 10
 6 5 -14 5704.76 517.895 10
 -6 5 13 592.211 192.87 4
 -6 -5 -13 420.751 231.343 11
 -6 -5 -13 611.539 310.828 10
 -6 5 12 13752.3 902.503 4
 -6 -5 -12 16589.1 1183.36 11
 -6 -5 -12 17530.4 1197.09 10
 -6 5 11 3634.69 507.803 4
 -6 -5 -11 3758.23 622.196 11
 -6 -5 -11 4260.12 646.106 10
 -6 5 10 8027.15 761.504 4
 -6 -5 -10 7835.14 901.491 11
 -6 -5 -10 8523.7 914.813 10
 -6 5 9 12742.6 1051.7 4
 -6 -5 -9 13090.5 1210.72 11
 -6 5 9 14748 937.192 6
 -6 -5 -9 14700.3 1235.33 10
 -6 5 8 13358.2 1080.57 4
 -6 -5 -8 14063.9 1242.08 11
 -6 5 8 14236.3 984.386 6
 -6 -5 -8 12981.4 1179.86 10
 -6 5 7 2348.5 487.971 4
 -6 5 7 2199.76 418.306 6
 -6 -5 -7 1430.8 494.243 11
 -6 -5 -7 1196.83 540.226 10
 -6 5 6 5817.55 716.056 4
 -6 -5 -6 5342.68 835.957 11
 -6 5 6 5189.92 636.049 6
 -6 -5 -6 6445.89 836.783 10
 -6 5 5 1678.96 400.25 4
 -6 5 5 1262.7 379.532 6
 -6 -5 -5 840.758 433.88 11
 -6 -5 -5 1573.63 515.393 10
 -6 5 4 4673.67 688.497 4
 -6 -5 -4 3459.45 674.868 11
 -6 5 4 4764.14 623.296 6
 -6 -5 -4 4251.98 712.294 10
 -6 5 3 3298.86 561.54 6
 -6 -5 -3 3724.18 669.571 11
 -6 -5 -3 3643.49 676.114 10
 -6 5 3 2923.92 564.685 4
 -6 5 2 19148.4 1350.9 4
 -6 -5 -2 19546.7 1435.79 11
 -6 -5 -2 18732.6 1454.79 10
 -6 5 2 20268.7 1317.79 6
 -6 5 1 8814.82 919.852 4
 -6 -5 -1 9155.82 928.31 11
 -6 -5 -1 7918.89 958.472 10
 -6 5 1 9061.7 861.983 6
 -6 5 0 13525.6 1104.72 4
 -6 -5 0 13519.1 1131.68 11
 -6 -5 0 15304.4 1323.41 10
 -6 5 0 15381.1 1112.21 6
 -6 -5 0 14317.1 1103.28 6
 -6 5 -1 6053.61 1617.42 2
 -6 5 -1 6828.64 813.642 4
 -6 5 -1 8626.59 823.784 6
 -6 -5 1 9380.79 912.516 6
 -6 5 -2 20484.9 2882.44 2
 -6 5 -2 19997.8 1401.43 4
 -6 5 -2 20418.8 1326.9 6
 -6 -5 2 18227.2 1374.67 6
 -6 -5 3 3252.09 638.932 6
 -6 5 -3 2702.53 531.593 5
 -6 5 -3 3369.55 553.772 6
 -6 5 -3 3414.09 599.406 4
 -6 5 -4 3683.17 580.367 5
 -6 5 -4 2816.09 515.475 12
 -6 5 -4 3100.97 514.596 6
 -6 5 -4 3588.39 605.967 4
 -6 -5 4 4591.41 697.157 6
 -6 -5 5 1427.17 488.163 6
 -6 5 -5 968.447 361.264 5
 -6 5 -5 2005.02 450.298 12
 -6 5 -5 1127.4 360.307 6
 -6 5 -5 1377.4 449.079 4
 -6 -5 6 6131.52 737.324 9
 -6 5 -6 6686.35 741.349 5
 -6 5 -6 6076.4 826.833 4
 -6 5 -6 7513.25 771.593 12
 -6 -5 6 6050.21 830.889 6
 -6 -5 7 1607.02 470.296 6
 -6 -5 7 1998.33 458.177 9
 -6 5 -7 1853.49 447.731 5
 -6 5 -7 1032.68 366.163 12
 -6 5 -7 731.193 412.633 4
 -6 -5 8 11564.3 1033.79 9
 -6 5 -8 13264.4 1034.48 5
 -6 5 -8 13241.1 1141.57 4
 -6 5 -8 11968.1 978.45 12
 -6 -5 8 13149.4 1155.24 6
 -6 -5 9 11474.9 1044.48 9
 -6 5 -9 14412.3 1056.23 12
 -6 5 -9 14035.8 1053.95 5
 -6 5 -9 14349.7 1297.25 11
 -6 -5 9 13938.1 1148.88 6
 -6 5 -10 7799.55 777.703 5
 -6 5 -10 7695.39 973.504 11
 -6 -5 10 7932.01 848.011 6
 -6 5 -11 3228.26 666.239 11
 -6 -5 11 4323.92 601.286 6
 6 -5 -12 12884.6 868.404 7
 -6 5 -12 16041.3 1184.22 11
 -6 -5 12 13758.3 984.14 6
 -6 -5 13 282.827 201.489 6
 -6 5 -13 362.305 248.624 3
 6 -5 -13 395.966 182.936 7
 -6 5 -13 697.132 285.291 11
 -6 5 -14 3733.02 425.222 3
 6 -5 -14 3943.14 375.026 7
 -6 5 -14 4151.77 490.76 11
 -6 -5 14 4574.79 433.611 6
 -6 5 -15 1451.91 229.986 3
 -6 5 -15 1432.07 254.46 11
 6 6 -14 446.208 173.021 10
 -6 -6 -14 -7.28495 119.236 11
 -6 -6 -14 220.404 187.844 10
 -6 6 13 1157.24 226.843 4
 -6 -6 -13 789.516 297.218 11
 -6 -6 -13 1105.97 310.571 10
 -6 6 12 2213.58 343.045 4
 -6 -6 -12 1839.49 431.323 11
 -6 -6 -12 2767.95 482.044 10
 -6 6 11 6979.65 648.749 4
 -6 -6 -11 6298.68 753.478 11
 -6 -6 -11 7622.49 797.835 10
 -6 6 10 598.878 240.281 4
 -6 -6 -10 140.622 290.888 11
 -6 -6 -10 557.293 325.503 10
 -6 6 9 15314 1125.71 4
 -6 -6 -9 17769.9 1336.14 11
 -6 -6 -9 16922.6 1270.64 10
 -6 6 8 5156.91 676.605 4
 -6 -6 -8 7556.97 909.607 11
 -6 6 8 7213.5 659.135 6
 -6 -6 -8 7299.48 890.146 10
 -6 6 7 23846.8 1500.76 4
 -6 -6 -7 21535.6 1580.37 11
 -6 6 7 25096.8 1355.02 6
 -6 -6 -7 22267.7 1564.86 10
 -6 6 6 665.732 356.721 4
 -6 6 6 422.966 261.529 6
 -6 -6 -6 1253.41 498.85 11
 -6 -6 -6 1907.94 542.501 10
 -6 6 5 10467.3 1001.76 4
 -6 -6 -5 12142.5 1171.37 11
 -6 6 5 11771.1 943.097 6
 -6 -6 -5 12167.9 1141.49 10
 -6 6 4 16777.9 1274.19 4
 -6 -6 -4 17527.9 1410.43 11
 -6 6 4 16466.2 1157.6 6
 -6 -6 -4 17059.3 1385.27 10
 -6 6 3 19185.7 1368.53 4
 -6 -6 -3 20444.5 1499.37 11
 -6 6 3 17709.7 1221.81 6
 -6 -6 -3 17905.3 1427.08 10
 -6 -6 -2 2534.92 584.253 11
 -6 6 2 4363.63 596.778 6
 -6 -6 -2 2870.48 642.398 10
 -6 6 2 3866.04 622.91 4
 -6 6 1 32780.9 1880.98 4
 -6 -6 -1 34739.5 1970.57 11
 -6 6 1 34927.2 1822.21 6
 -6 -6 -1 34250.6 2045.84 10
 -6 6 0 22847.7 1511.76 4
 -6 -6 0 22621.4 1515.64 11
 -6 6 0 23638.8 1461.04 6
 -6 6 -1 32924.1 1910.76 4
 -6 6 -1 38981.7 1913.49 6
 -6 -6 1 33284.5 1883.73 6
 -6 6 -2 3139.15 532.963 6
 -6 -6 2 2843.67 578.848 6
 -6 6 -2 3122.75 564.617 5
 -6 6 -2 3354.47 614.072 4
 -6 6 -3 18669.7 1264.77 5
 -6 6 -3 19384.4 1392.87 4
 -6 6 -3 20246 1317.65 6
 -6 -6 3 17525.5 1400.29 6
 -6 -6 4 16968.8 1227.71 9
 -6 6 -4 15760.8 1169.36 5
 -6 6 -4 18673 1363.59 4
 -6 6 -4 17580.8 1187.27 12
 -6 -6 4 17936 1401.92 6
 -6 -6 5 12860.5 1177.9 6
 -6 -6 5 10597.8 967.156 9
 -6 6 -5 11776.1 976.201 5
 -6 6 -5 12291.2 1111.02 4
 -6 6 -5 11501.7 941.857 12
 -6 -6 6 1148.65 443.339 6
 -6 -6 6 429.321 242.631 9
 -6 6 -6 488.314 314.035 5
 -6 6 -6 750.735 348.772 12
 -6 6 -6 964.79 389.348 4
 -6 -6 7 23739.5 1590.3 6
 -6 -6 7 22204.6 1462.16 9
 -6 6 -7 22589.7 1380.43 5
 -6 6 -7 24033.9 1562.18 4
 -6 6 -7 22525.3 1350.5 12
 -6 -6 8 7023.2 818.66 9
 -6 6 -8 8171.75 802.764 5
 -6 6 -8 6713.05 822.346 4
 -6 6 -8 7058.08 722.983 12
 -6 -6 8 6325 794.384 6
 -6 -6 9 14310.5 1114.92 9
 -6 6 -9 14301 1045.02 5
 -6 6 -9 14089.6 1277.83 11
 -6 -6 9 14314.5 1155.68 6
 -6 -6 10 517.573 288.292 6
 -6 -6 10 -108.35 248.848 9
 -6 6 -10 351.816 310.357 5
 -6 6 -10 640.864 353.413 11
 -6 6 -11 5917.5 762.148 11
 -6 -6 11 6275.9 677.607 6
 -6 -6 12 2146.18 389.648 6
 -6 6 -12 2895.21 510.043 11
 -6 -6 13 730.01 238.516 6
 -6 6 -13 973.042 276.266 3
 -6 6 -13 833.463 292.23 11
 -6 -6 14 337.645 118.261 6
 -6 6 -14 5.21144 145.998 3
 -6 6 -14 398.848 199.011 11
 6 7 -13 1534.29 244.834 10
 -6 -7 -13 1365.03 278.384 11
 -6 -7 -13 1252.02 283.215 10
 -6 7 13 1373.45 221.398 4
 -6 -7 -12 -20.8526 201.496 11
 -6 -7 -12 -52.3514 244.324 10
 -6 7 12 51.5413 124.321 4
 -6 7 11 2089.01 360.083 4
 -6 -7 -11 2347.78 451.9 11
 -6 -7 -11 2225.25 420.838 10
 -6 7 10 5659.82 604.136 4
 -6 -7 -10 5653.1 716.002 11
 -6 -7 -10 6642.99 729.179 10
 -6 7 9 7254.65 720.833 4
 -6 -7 -9 7741.6 883.179 11
 -6 -7 -9 9509.6 903.034 10
 -6 7 8 3980.77 593.824 4
 -6 -7 -8 5569.63 781.292 11
 -6 7 8 5032.49 504.768 6
 -6 -7 -8 5413.12 744.062 10
 -6 7 7 2154.07 460.717 4
 -6 7 7 2909.78 425.313 6
 -6 -7 -7 1871.07 547.699 11
 -6 -7 -7 2185.41 542.05 10
 -6 7 6 1153.45 308.638 6
 -6 -7 -6 1511.64 523.619 11
 -6 -7 -6 1807.9 485.309 10
 -6 7 6 2201.28 491.554 4
 -6 7 5 4801.15 681.074 4
 -6 -7 -5 5870.99 806.583 11
 -6 7 5 5458.41 622.115 6
 -6 -7 -5 4639.42 727.383 10
 -6 7 4 9929.13 961.129 4
 -6 -7 -4 9845.39 1054.24 11
 -6 7 4 8888.44 812.189 6
 -6 -7 -4 8515.12 959.688 10
 -6 -7 -3 2762.04 625.878 11
 -6 7 3 3493.42 540.97 6
 -6 -7 -3 3009.11 640.435 10
 -6 7 3 2860.95 536.052 4
 -6 7 2 4709.43 753.607 6
 -6 7 2 5879.91 740.263 4
 -6 -7 -2 3878.62 726.021 11
 -6 -7 -2 4166.04 704.51 10
 -6 7 1 1230.91 366.581 6
 -6 -7 -1 783.845 399.753 11
 -6 7 1 1935.35 467.47 4
 -6 7 0 -110.549 250.466 6
 -6 -7 0 -145.43 212.887 11
 -6 7 0 36.2393 285.842 4
 -6 7 -1 1114.6 387.151 6
 -6 -7 1 1543.02 400.282 6
 -6 7 -1 1388.06 435.526 4
 -6 -7 2 3896.42 538.546 9
 -6 7 -2 3814.89 566.936 5
 -6 7 -2 5100.82 700.746 4
 -6 -7 2 5060.28 714.891 6
 -6 -7 3 3663.37 613.792 6
 -6 -7 3 3083.67 525.723 9
 -6 7 -3 3394.69 574.895 5
 -6 7 -3 2916.34 503.546 12
 -6 7 -3 3381.36 606.905 4
 -6 -7 4 7782.75 804.892 9
 -6 7 -4 8842.87 826.091 5
 -6 7 -4 8725.41 916.874 4
 -6 7 -4 8137.45 779.615 12
 -6 -7 4 8895.34 948.573 6
 -6 -7 5 4947.56 731.681 6
 -6 -7 5 4821.06 675.576 9
 -6 7 -5 4950.38 652.165 5
 -6 7 -5 5910.69 755.619 4
 -6 7 -5 5504.2 631.368 12
 -6 -7 6 1961.71 528.404 6
 -6 -7 6 1311.81 407.748 9
 -6 7 -6 1763.92 428.196 5
 -6 7 -6 1051.51 333.802 12
 -6 7 -6 1617 470.698 4
 -6 -7 7 2573.26 534.548 6
 -6 -7 7 2793.62 527.334 9
 -6 7 -7 2322.22 461.57 5
 -6 7 -7 2424.28 451.887 12
 -6 7 -7 2403.03 557.845 4
 -6 -7 8 4430.56 624.018 9
 -6 7 -8 3957.33 580.272 5
 -6 7 -8 4510.85 658.547 4
 -6 7 -8 4113.23 534.561 12
 -6 -7 8 6110.88 744.101 6
 -6 -7 9 7075.76 767.875 9
 -6 7 -9 7236.61 716.607 5
 -6 -7 9 7179.47 761.857 6
 -6 -7 10 6057.27 659.322 9
 -6 7 -10 6370.71 795.592 11
 -6 -7 10 6218.57 664.773 6
 -6 -7 11 2759.95 436.846 6
 -6 7 -11 2529.68 493.995 11
 -6 -7 12 259.496 198.22 6
 -6 7 -12 193.192 223.912 11
 -6 -7 13 1361.41 240.105 6
 -6 7 -13 1149.57 255.837 3
 -6 7 -13 1422.72 294.113 11
 -6 -8 -12 980.177 252.981 10
 -6 8 12 1279.41 225.806 4
 -6 -8 -11 506.161 262.776 11
 -6 -8 -11 -147.339 175.637 10
 -6 8 11 226.596 180.519 4
 -6 8 10 4590.91 506.639 4
 -6 -8 -10 4715.98 592.34 11
 -6 -8 -10 3960.81 513.042 10
 -6 8 9 2666.85 422.027 4
 -6 -8 -9 2221.22 488.351 11
 -6 -8 -9 1995.09 435.195 10
 -6 8 8 8353.84 766.997 4
 -6 -8 -8 8302.23 883.23 11
 -6 -8 -8 7758.95 790.226 10
 -6 -8 -7 741.984 405.785 11
 -6 -8 -7 1431.42 453.126 10
 -6 8 7 1271.45 345.237 4
 -6 8 6 10541.6 942.124 4
 -6 -8 -6 11812.7 1114.05 11
 -6 -8 -6 13284.7 1103.11 10
 -6 8 5 10814.8 962.19 4
 -6 -8 -5 10109.4 1054.9 11
 -6 -8 -5 11519 1048.62 10
 -6 8 4 14544.7 1124.39 4
 -6 -8 -4 14198.9 1210.83 11
 -6 -8 -4 12743 1142.12 10
 -6 8 3 5329.06 712.66 4
 -6 -8 -3 6610.51 851.592 11
 -6 8 3 6963.95 705.445 6
 -6 -8 -3 7002.82 844.364 10
 -6 -8 -2 187.552 328.564 11
 -6 8 2 517.983 324.319 4
 -6 8 1 1627.14 437.754 4
 -6 -8 0 15300.4 1076.67 9
 -6 8 0 16146.7 1222.57 4
 -6 -8 1 967.289 343.198 9
 -6 8 -1 902.136 371.311 5
 -6 8 -1 1009.81 391.729 4
 -6 -8 2 421.263 226.078 6
 -6 -8 2 908.085 307.044 9
 -6 8 -2 555.004 337.724 5
 -6 8 -2 306.976 264.346 12
 -6 8 -2 417.625 338.907 4
 -6 -8 3 5789.62 711.06 9
 -6 8 -3 6921.9 706.269 5
 -6 8 -3 6526.11 769.297 4
 -6 8 -3 6352.81 649.162 12
 -6 -8 3 7183.36 795.698 6
 -6 -8 4 11656.1 972.042 9
 -6 8 -4 12110.1 947.013 5
 -6 8 -4 13100.7 1098.29 4
 -6 8 -4 13130.6 925.253 12
 -6 -8 4 13733 1108.26 6
 -6 -8 5 10241.2 914.73 9
 -6 8 -5 11133.1 877.525 5
 -6 8 -5 11673.2 1005.52 4
 -6 8 -5 11332.2 843.419 12
 -6 -8 5 10920.8 990.088 6
 -6 -8 6 11827.4 999.828 6
 -6 -8 6 9964.92 905.322 9
 -6 8 -6 13251.5 937.32 5
 -6 8 -6 12201.4 1031.33 4
 -6 8 -6 11769.3 849.444 12
 -6 -8 7 1386.31 378.705 6
 -6 -8 7 1413.56 338.957 9
 -6 8 -7 1096.31 328.666 5
 -6 8 -7 970.939 292.035 12
 -6 8 -7 1115.27 389.174 4
 -6 -8 8 7035.12 729.492 9
 -6 8 -8 8243.99 726.323 5
 -6 -8 8 8811.47 807.896 6
 -6 8 -9 2503.53 416.157 5
 -6 -8 9 2588.44 447.902 9
 -6 -8 9 3134.92 483.161 6
 -6 -8 10 5223.91 559.127 9
 -6 8 -10 5023.57 642.76 11
 -6 -8 10 4795.77 546.099 6
 -6 -8 11 552.525 242.511 6
 -6 8 -11 912.802 287.086 11
 -6 -8 12 1344.49 258.712 6
 -6 8 -12 1688.99 321.073 11
 -6 9 11 717.679 190.88 4
 -6 9 10 11723.1 710.544 4
 -6 -9 -10 8048.67 608.134 10
 -6 -9 -9 147.477 200.068 10
 -6 9 9 426.146 220.368 4
 -6 9 8 5217.72 557.511 4
 -6 -9 -8 4164.35 520.595 10
 -6 -9 -7 1098.41 325.879 10
 -6 9 7 1565.3 347.096 4
 -6 -9 -6 1717.47 420.529 10
 -6 9 6 2405.12 442.088 4
 -6 9 5 9895.8 859.684 4
 -6 9 4 2546.5 474.881 4
 -6 9 3 10655.6 931.881 4
 -6 9 2 1020.35 350.23 4
 -6 -9 -1 9741.41 788.322 9
 -6 9 1 11221.9 867.815 5
 -6 9 1 11101.5 954.58 4
 -6 -9 0 2411.52 414.074 9
 -6 9 0 1781.91 393.41 5
 -6 9 0 913.561 318.2 12
 -6 9 0 1434.2 414.516 4
 -6 -9 1 10094.1 843.151 9
 -6 9 -1 10252.2 826.385 5
 -6 9 -1 10984.1 948.414 4
 -6 9 -1 11021.3 799.227 12
 -6 -9 2 1654.65 378.314 9
 -6 9 -2 2320.44 408.717 5
 -6 9 -2 1603.87 396.626 12
 -6 9 -2 1049.55 375.28 4
 -6 -9 3 9033.59 791.969 9
 -6 9 -3 9922.47 800.099 5
 -6 9 -3 9723.27 893.745 4
 -6 9 -3 9068.79 694.523 12
 -6 -9 3 9537.15 817.177 6
 -6 -9 4 2356.04 433.213 6
 -6 -9 4 1793.03 399.417 9
 -6 9 -4 1958.19 378.259 5
 -6 9 -4 1323.7 313.752 12
 -6 9 -4 1602.44 421.164 4
 -6 -9 5 9812.64 828.051 9
 -6 9 -5 12385.4 850.218 5
 -6 9 -5 10691.7 924.105 4
 -6 9 -5 8824.03 688.051 12
 -6 -9 5 8750.41 802.797 6
 -6 -9 6 2639.62 444.405 6
 -6 -9 6 1907.07 378.976 9
 -6 9 -6 2041.22 375.323 5
 -6 9 -6 2495.57 474.656 4
 -6 -9 7 962.193 294.455 6
 -6 -9 7 1049.77 332.301 9
 -6 9 -7 1187.62 318.942 5
 -6 9 -7 1485.33 394.677 4
 -6 -9 8 5221.44 577.85 9
 -6 9 -8 5888.52 552.812 5
 -6 -9 8 5755.58 594.265 6
 -6 -9 9 351.471 221.064 6
 -6 -9 9 503.163 242.899 9
 -6 9 -9 757.974 311.409 11
 -6 9 -10 11176.4 806.536 11
 -6 -9 10 10219.7 696.825 6
 -6 -9 11 872.791 199.734 6
 -6 9 -11 1267.53 267.7 11
 -6 10 9 2976.91 337.547 4
 -6 10 8 2977.67 391.616 4
 -6 10 7 1614.6 315.234 4
 -6 10 6 6794.69 629.963 4
 -6 10 5 553.489 259.997 4
 -6 10 4 1645.66 310.81 5
 -6 10 4 2070.16 367.184 4
 -6 10 3 1067.74 294.521 5
 -6 10 3 1606.71 350.375 4
 -6 -10 -2 5006.31 545.808 9
 -6 10 2 5003.09 520.876 5
 -6 10 2 5093.28 594.128 4
 -6 -10 -1 3106.8 433.901 9
 -6 10 1 3841.52 465.391 5
 -6 10 1 3697.27 528.845 4
 -6 -10 0 232.477 213.521 9
 -6 10 0 108.626 221.354 5
 -6 10 0 -473.82 266.871 4
 -6 -10 1 3615.3 467.369 9
 -6 10 -1 2880.47 417.054 5
 -6 10 -1 3862.18 527.251 4
 -6 -10 2 4277.4 520.938 9
 -6 10 -2 4293.49 482.867 5
 -6 10 -2 5360.35 613.406 4
 -6 -10 3 1962.16 392.883 9
 -6 10 -3 1710.57 333.99 5
 -6 10 -3 2449.3 434.591 4
 -6 -10 4 962.579 268.95 6
 -6 -10 4 1560.5 334.114 9
 -6 10 -4 1710.15 312.154 5
 -6 10 -4 2259.97 409.479 4
 -6 -10 5 320.013 205.064 6
 -6 -10 5 116.11 192.729 9
 -6 10 -5 439.441 223.417 5
 -6 10 -5 680.449 272.466 4
 -6 -10 6 6749.53 606.991 9
 -6 10 -6 6265.1 531.445 5
 -6 10 -6 5962.17 605.928 4
 -6 -10 6 5987.26 556.591 6
 -6 -10 7 967.433 264.438 6
 -6 -10 7 1217.32 287.518 9
 -6 -10 8 3466.83 397.098 9
 -6 10 -8 3509.03 457.753 11
 -6 -10 8 3084.72 362.857 6
 -6 -10 9 2550.31 325.707 9
 -6 10 -9 2842.86 373.874 11
 -6 -10 9 2493.3 312.963 6
 -6 11 7 5939.25 456.961 4
 -6 11 6 1039.75 244.805 4
 -6 11 5 3209.17 293.536 5
 -6 11 5 3335.36 391.148 4
 -6 11 4 6512.64 486.996 5
 -6 11 4 6571.41 570.402 4
 -6 11 3 3193.81 326.774 5
 -6 11 3 3900.26 454.641 4
 -6 -11 -2 4890 462.561 9
 -6 11 2 6514.4 482.086 5
 -6 11 2 6275.36 580.994 4
 -6 -11 -1 3057.07 369.874 9
 -6 11 1 3718.48 366.371 5
 -6 11 1 4234.03 486.92 4
 -6 -11 0 3158.41 384.845 9
 -6 11 0 3886.99 381.759 5
 -6 11 0 4255.36 496.857 4
 -6 -11 1 2772.23 388.82 9
 -6 11 -1 3526.1 368.657 5
 -6 11 -1 3195.15 434.235 4
 -6 -11 2 5827.36 532.757 9
 -6 11 -2 6665.43 494.919 5
 -6 11 -2 6889.49 602.772 4
 -6 -11 3 3608.84 426.77 9
 -6 11 -3 3567.4 372.863 5
 -6 11 -3 4088.38 462.571 4
 -6 -11 4 5735.48 511.615 9
 -6 11 -4 6133.53 467.144 5
 -6 11 -4 6768.27 583.181 4
 -6 -11 5 4269.75 420.624 9
 -6 11 -5 4723.79 467.178 4
 -6 -11 6 749.158 199.806 9
 -6 11 -6 976.692 239.684 11
 -6 11 -7 5157.82 448.875 11
 -6 12 3 5730.46 439.559 4
 -6 12 2 2168.1 272.023 4
 -6 12 1 2441.63 292.871 4
 -6 12 0 70.8905 117.623 4
 -6 12 -1 2623.6 322.766 4
 -6 12 -2 1497.01 250.632 4
 -6 12 -3 5906.29 451.898 4
 -7 0 0 343.109 244.298 6
 -7 0 -1 8252.72 790.613 6
 -7 0 1 9741.46 899.793 6
 -7 0 -2 7240.59 796.74 11
 -7 0 -2 7051 700.192 6
 -7 0 2 5798.97 730.459 6
 -7 0 -3 9516.6 843.955 12
 -7 0 -3 8857.49 949.049 11
 -7 0 -3 9003.43 933.198 10
 -7 0 -3 9474.27 801.075 6
 -7 0 3 10628.7 970.584 6
 -7 0 4 192.846 228.684 6
 -7 0 -4 418.237 306.396 12
 -7 0 -4 238.758 334.783 11
 -7 0 -4 1188.21 414.082 10
 -7 0 -5 18513.9 1185.58 12
 -7 0 -5 18149.9 1402.04 11
 -7 0 -5 18151 1319.11 10
 -7 0 5 20119.9 1377.74 6
 -7 0 6 2165.9 487.837 6
 -7 0 -6 2613.45 461.156 12
 -7 0 -6 1761.86 540.229 11
 -7 0 -6 2125.05 471.646 10
 -7 0 7 1933.21 455.831 6
 -7 0 -7 463.531 292.776 12
 -7 0 -7 860.47 467.173 11
 -7 0 -7 709.57 354.449 10
 -7 0 8 738.416 354.989 6
 -7 0 -8 274.18 389.151 11
 -7 0 -8 1171.86 367.035 10
 -7 0 -9 29037.2 1755.55 11
 -7 0 -9 25477.2 1535.83 10
 -7 0 9 28476.5 1570.96 6
 -7 0 -10 8269.06 898.008 11
 -7 0 -10 6648.3 699.966 10
 -7 0 10 6770.44 684.878 6
 -7 0 -11 3945.62 630.703 11
 -7 0 11 4115.32 499.748 6
 -7 0 -11 2578.55 436.331 10
 -7 0 -12 3050.87 529.729 11
 -7 0 12 4463.16 454.117 6
 -7 0 -12 2690.15 422.857 10
 -7 0 -13 9675.65 800.698 11
 -7 0 13 9136.82 567.974 6
 7 0 -13 9118.33 645.444 10
 7 0 -14 -427.905 163.076 10
 -7 0 -14 -19.3294 193.228 11
 7 1 -14 1298.59 250.603 10
 -7 -1 -14 1265.12 306.45 11
 7 1 -13 2508.77 366.177 10
 -7 -1 -13 1637.9 372.244 11
 -7 -1 -13 1671.08 290.606 10
 -7 -1 -12 3110.2 539.566 11
 -7 -1 -12 3522.4 508.875 10
 -7 1 12 3209.48 379.528 6
 -7 -1 -11 15179.2 1152.49 11
 -7 -1 -11 13697.1 1044.95 10
 -7 1 11 14227.7 906.116 6
 -7 -1 -10 5915.26 774.103 11
 -7 -1 -10 6667 750.726 10
 -7 1 10 7898.49 702.435 6
 -7 1 9 1179.61 367.033 6
 -7 -1 -9 1620.02 454.66 11
 -7 -1 -9 905.028 355.623 10
 -7 -1 -8 16733.7 1330.29 11
 -7 -1 -8 17410.9 1290.6 10
 -7 1 8 17044.6 1177.3 6
 -7 -1 -7 8105.88 725.21 12
 -7 -1 -7 7314.88 907.614 11
 -7 -1 -7 6613.37 799.067 10
 -7 1 7 6912.6 764.528 6
 -7 1 6 818.697 388.91 6
 -7 -1 -6 828.766 302.376 12
 -7 -1 -6 977.494 418.317 11
 -7 -1 -6 620.928 380.564 10
 -7 -1 -5 21114.2 1218.92 12
 -7 -1 -5 20789.3 1510.23 11
 -7 -1 -5 18841.2 1387.9 10
 -7 1 5 21611 1404.68 6
 -7 -1 -4 4967.57 583.417 12
 -7 -1 -4 4292.84 687.383 11
 -7 1 4 5524.85 708.853 6
 -7 -1 -4 4418.85 691.583 10
 -7 -1 -3 28128.9 1453.75 12
 -7 -1 -3 24743.5 1612.15 11
 -7 -1 -3 25161.4 1660.76 10
 -7 1 3 26586 1581.77 6
 -7 -1 -2 691.043 270.537 6
 -7 1 2 910.323 357.086 6
 -7 -1 -2 1114.61 327.793 12
 -7 -1 -2 691.839 333.072 11
 -7 -1 -2 1029.46 486.708 10
 -7 1 1 60133.4 2593.4 6
 -7 -1 -1 57687.2 2476.42 6
 -7 1 0 16596.8 1170.23 6
 -7 -1 0 16553.3 1168.47 6
 -7 1 -1 60798.4 2435.34 5
 -7 1 -1 56419.3 2467.74 6
 -7 -1 1 58906.2 2578.27 6
 -7 1 -2 541.009 233.64 6
 -7 -1 2 561.144 308.292 6
 -7 1 -2 1182.58 441.992 11
 -7 1 -3 25697.4 1489.98 12
 -7 1 -3 23844.8 1589.82 11
 -7 1 -3 26479.7 1433.71 6
 -7 -1 3 27695.8 1644.91 6
 -7 1 -4 4763.47 630.435 12
 -7 1 -4 5072.92 741.483 11
 -7 1 -4 5083.26 579.643 6
 -7 -1 4 5611.66 737.837 6
 -7 1 -5 19994.9 1262.94 12
 -7 1 -5 19124 1408.72 11
 -7 -1 5 18990.4 1379.44 6
 -7 -1 6 1021.31 393.496 6
 -7 1 -6 788.184 352.311 12
 -7 1 -6 751.296 418.477 11
 -7 1 -7 7550.86 766.578 12
 -7 1 -7 7461.25 917.962 11
 -7 -1 7 7053.88 813.731 6
 -7 1 -8 16074 1099.64 12
 -7 1 -8 15708.5 1303.46 11
 -7 -1 8 17432.1 1230.02 6
 -7 -1 9 872.134 362.743 6
 -7 1 -9 393.647 375.438 11
 -7 1 -10 7022.03 849.532 11
 -7 -1 10 7222.71 723.471 6
 -7 1 -11 16071.7 1216.8 11
 -7 -1 11 15261 999.64 6
 7 -1 -12 2699.58 369.633 10
 -7 1 -12 3236.43 547.581 11
 -7 -1 12 3348.88 419.119 6
 -7 1 -13 1871.14 397.995 11
 -7 -1 13 2373 293.772 6
 -7 1 -14 920.788 269.584 11
 7 2 -14 2232.26 306.609 10
 -7 -2 -14 2143.62 335.652 11
 -7 -2 -14 1182.06 241.87 10
 -7 -2 -13 323.623 275.469 11
 -7 -2 -13 862.018 289.072 10
 -7 -2 -12 6001.66 672.295 11
 -7 -2 -12 5408.28 616.544 10
 -7 -2 -11 14779.6 1120.59 11
 -7 -2 -11 14959.1 1112.48 10
 -7 2 11 14780.1 877.107 6
 -7 2 10 283.34 218.547 6
 -7 -2 -10 550.735 406.637 11
 -7 -2 -10 546.144 317.957 10
 -7 2 9 1009.17 339.743 6
 -7 -2 -9 1360.05 485.859 11
 -7 -2 -9 531.557 380.87 10
 -7 -2 -8 50323.3 2486.01 11
 -7 -2 -8 49239 2404.74 10
 -7 2 8 51523.7 2255.61 6
 -7 2 7 778.579 321.905 6
 -7 -2 -7 632.199 434.247 11
 -7 -2 -7 591.53 373.091 10
 -7 -2 -6 20206.9 1460.02 11
 -7 -2 -6 19404.7 1404.3 10
 -7 2 6 18688.1 1276.53 6
 -7 -2 -5 20895.7 1493.5 11
 -7 -2 -5 18590.7 1411.39 10
 -7 2 5 20856.9 1368.77 6
 -7 -2 -4 136441 4970.34 11
 -7 -2 -4 144869 5061.72 10
 -7 2 4 131535 4741.93 6
 -7 -2 -3 12746.7 1121.52 11
 -7 -2 -3 14094.2 1223.73 10
 -7 2 3 13365.6 1078.89 6
 -7 -2 -2 41169.5 2130.01 11
 -7 -2 -2 41460.6 2275.01 10
 -7 2 2 42074.4 2075.66 6
 -7 -2 -2 44343.7 1973.38 6
 -7 2 1 16096.2 1152.98 6
 -7 -2 -1 14677.7 1075.12 6
 -7 2 0 258614 7874.54 6
 -7 -2 0 251787 7877.06 6
 -7 2 -1 14990.9 1085.46 5
 -7 2 -1 18113.4 1184.65 6
 -7 -2 1 14343 1121.39 6
 -7 2 -2 38451.9 1876.37 5
 -7 2 -2 39169.4 2006.47 11
 -7 2 -2 38777 1885.56 6
 -7 -2 2 42948.8 2141.84 6
 -7 2 -3 14451.2 1029.82 5
 -7 2 -3 13763.2 1145.59 11
 -7 2 -3 13776.2 1012.93 6
 -7 -2 3 15407.4 1206.64 6
 -7 2 -4 138930 4677.78 5
 -7 2 -4 140755 4804.92 12
 -7 2 -4 136100 5018.73 11
 -7 2 -4 146610 4698.53 6
 -7 -2 4 138860 5006.23 6
 -7 2 -5 19840.5 1230.87 5
 -7 2 -5 21374.8 1341.64 12
 -7 2 -5 19663.5 1457.16 11
 -7 2 -5 22048.7 1238.34 6
 -7 -2 5 21403.7 1483.13 6
 -7 2 -6 18913.5 1166.53 5
 -7 2 -6 18068.6 1219.65 12
 -7 2 -6 18329.9 1419.66 11
 -7 -2 6 19522.5 1374.82 6
 -7 -2 7 625.407 367.369 6
 -7 2 -7 615.205 291.642 5
 -7 2 -7 1193.1 396.172 12
 -7 2 -7 440.486 405.705 11
 -7 2 -8 50161 2130.83 5
 -7 2 -8 51546.4 2227.64 12
 -7 2 -8 50184.6 2519.32 11
 -7 -2 8 49208 2329.17 6
 -7 -2 9 976.895 338.139 6
 -7 2 -9 665.14 394.699 11
 -7 -2 10 804.941 316.297 6
 -7 2 -10 520.272 412.354 11
 -7 2 -11 12935.9 1070.01 11
 -7 -2 11 13786.6 949.06 6
 -7 2 -12 5200 659.413 11
 -7 -2 12 5439.38 527.363 6
 -7 -2 13 264.913 168.015 6
 -7 2 -13 531.771 258.607 11
 -7 2 -14 2240.29 339.474 11
 -7 -3 -14 6960.2 538.411 11
 -7 -3 -14 5067.56 475.34 10
 7 3 -14 7148.53 514.181 10
 -7 -3 -13 8540.73 708.563 11
 -7 -3 -13 9378.22 738.918 10
 -7 -3 -12 750.378 306.226 11
 -7 -3 -12 438.744 322.23 10
 -7 -3 -11 6095.26 718.831 11
 -7 3 11 7723.35 568.147 6
 -7 -3 -11 7173.72 765.349 10
 -7 -3 -10 7903.3 840.896 11
 -7 -3 -10 7839.76 825.641 10
 -7 3 10 8838.85 683.933 6
 -7 -3 -9 8631.26 898.347 11
 -7 -3 -9 8182.04 911.083 10
 -7 3 9 7831.23 688.945 6
 -7 -3 -8 17094.8 1337.81 11
 -7 -3 -8 20095.2 1381.88 10
 -7 3 8 19660.6 1194.43 6
 -7 -3 -7 6183.42 820.461 11
 -7 -3 -7 5886.52 802.484 10
 -7 3 7 7908.79 762.17 6
 -7 -3 -6 6906.89 863.31 11
 -7 -3 -6 7406.5 890.81 10
 -7 3 6 6698.81 754.922 6
 -7 3 5 3818.12 596.942 6
 -7 -3 -5 3698.23 671.113 11
 -7 -3 -5 4435.51 716.77 10
 -7 -3 -4 14823.6 1259.39 11
 -7 -3 -4 14559.7 1246.85 10
 -7 3 4 15718.6 1151.45 6
 -7 -3 -3 9197.53 958.141 11
 -7 -3 -3 9885.87 1015.46 10
 -7 3 3 8048.98 833.439 6
 -7 3 2 1519.47 372.883 6
 -7 -3 -2 1933.02 471.46 11
 -7 -3 -2 1327.55 494.211 10
 -7 3 1 459.5 258.816 6
 -7 -3 -1 472.02 275.291 6
 -7 3 0 5199.4 659.116 6
 -7 -3 0 5359.1 663.857 6
 -7 3 -1 604.229 333.13 6
 -7 -3 1 485.556 340.298 6
 -7 3 -1 421.017 263.918 5
 -7 3 -2 2487.49 463.13 6
 -7 -3 2 2129.55 495.767 6
 -7 3 -2 2274.81 463.5 5
 -7 3 -3 10442.7 885.749 5
 -7 3 -3 8224.04 880.856 11
 -7 3 -3 9650.14 836.5 6
 -7 -3 3 8086.99 918.636 6
 -7 3 -4 15280.1 1093.88 5
 -7 3 -4 14287.7 1101.58 12
 -7 3 -4 15177.4 1226.79 11
 -7 3 -4 14602.1 1037.89 6
 -7 -3 4 16235.5 1264.94 6
 -7 3 -5 4465.94 608.346 5
 -7 3 -5 5064.48 677.049 12
 -7 3 -5 4901.83 743.054 11
 -7 3 -5 5476.53 607.194 6
 -7 -3 5 4818.06 699.811 6
 -7 3 -6 7624.15 746.358 5
 -7 3 -6 7822.73 790.029 12
 -7 3 -6 7396.94 914.775 11
 -7 -3 6 7123.19 836.17 6
 -7 3 -7 7062.9 703.209 5
 -7 3 -7 8013.63 782.554 12
 -7 3 -7 7842.54 917.47 11
 -7 -3 7 8363.34 875.458 6
 -7 3 -8 17800.9 1151.76 5
 -7 3 -8 18984.2 1222.59 12
 -7 3 -8 18843.6 1426 11
 -7 -3 8 20101.1 1332.78 6
 -7 3 -9 7937.45 902.135 11
 -7 -3 9 7284.03 778.645 6
 -7 3 -10 9181.35 939.411 11
 -7 -3 10 9806.68 862.39 6
 -7 3 -11 6328.64 749.649 11
 -7 -3 11 7225.9 671.201 6
 -7 -3 12 748.041 237.593 6
 -7 3 -12 643.951 305.373 11
 -7 3 -13 8553.86 704.892 11
 -7 -3 13 8042.34 555.269 6
 -7 3 -14 6689.58 529.987 11
 -7 -4 -13 1168.06 269.099 11
 -7 -4 -13 939.978 283.12 10
 -7 -4 -12 1735.32 338.674 11
 -7 -4 -12 1878.46 381.419 10
 -7 -4 -11 4587.26 593.346 11
 -7 -4 -11 4225.37 587.927 10
 -7 -4 -10 3283.89 567.515 11
 -7 4 10 3291.65 385.015 6
 -7 -4 -10 2635.69 520.996 10
 -7 -4 -9 5036.86 701.058 11
 -7 4 9 4412.79 492.765 6
 -7 -4 -9 4412.59 640.553 10
 -7 -4 -8 2393.85 557.834 11
 -7 4 8 3042.48 444.03 6
 -7 -4 -8 2481.93 549.775 10
 -7 -4 -7 25769.1 1664.16 11
 -7 -4 -7 26426.9 1644.09 10
 -7 4 7 26142.8 1426.27 6
 -7 -4 -6 17381.9 1343.38 11
 -7 -4 -6 16396.6 1289.05 10
 -7 4 6 16651.6 1129.58 6
 -7 -4 -5 29793.9 1822.54 11
 -7 -4 -5 30837.2 1839.51 10
 -7 4 5 29548.6 1619.15 6
 -7 4 4 907.675 353.621 6
 -7 -4 -4 192.742 338.181 11
 -7 -4 -4 130.621 411.993 10
 -7 -4 -3 27608.4 1723.35 11
 -7 -4 -3 28646.1 1805.96 10
 -7 4 3 29560.8 1629.76 6
 -7 -4 -2 39158.2 2058.92 11
 -7 -4 -2 36058.8 2120.89 10
 -7 4 2 39134.4 1935.15 6
 -7 4 1 45319.4 2129.97 6
 -7 4 0 13206.4 1010.64 6
 -7 -4 0 10257.7 903.977 6
 -7 4 -1 50651.6 2253.38 5
 -7 4 -1 55554.4 2309.02 6
 -7 -4 1 42070 2198.61 6
 -7 4 -2 43872 2032.62 5
 -7 4 -2 38766.8 1992.52 4
 -7 4 -2 41164.9 1970.93 6
 -7 -4 2 42296.6 2132.31 6
 -7 4 -3 31140 1646.06 5
 -7 4 -3 28075.3 1636.98 4
 -7 4 -3 26666.6 1571.25 12
 -7 4 -3 29397.9 1739.39 11
 -7 4 -3 32864.4 1661.54 6
 -7 -4 3 31015.4 1788.81 6
 -7 4 -4 866.615 305.558 6
 -7 -4 4 1225.63 417.172 6
 -7 4 -4 454.309 311.772 5
 -7 4 -4 509.905 365.151 12
 -7 4 -4 283.084 170.877 11
 -7 4 -4 329.359 243.706 4
 -7 4 -5 33393.1 1676.4 5
 -7 4 -5 29443.8 1695.12 4
 -7 4 -5 30401.5 1652.3 12
 -7 4 -5 32174.7 1886.93 11
 -7 4 -5 33339.6 1614.05 6
 -7 -4 5 29574.6 1784.64 6
 -7 4 -6 18429.3 1185.01 5
 -7 4 -6 17664.2 1188.34 12
 -7 4 -6 18369.1 1391.1 11
 -7 -4 6 17462.1 1300.65 6
 -7 4 -7 25770 1429.96 5
 -7 4 -7 25657.6 1446.21 12
 -7 4 -7 26308.6 1708.3 11
 -7 -4 7 27608.5 1627.58 6
 -7 4 -8 2881.91 476.98 5
 -7 4 -8 3591.96 553.895 12
 -7 4 -8 3070.78 600.861 11
 -7 -4 8 3730.99 585.657 6
 -7 -4 9 4744.99 735.607 6
 -7 4 -9 4752.89 567.419 5
 -7 4 -9 5118.81 739.991 11
 -7 4 -10 2718.16 530.356 11
 -7 -4 10 3184.15 494.08 6
 -7 4 -11 4716.54 632.778 11
 -7 -4 11 4252.99 506.086 6
 -7 -4 12 1449.38 293.566 6
 -7 4 -12 1608.55 371.857 11
 -7 -4 13 1031.64 194.445 6
 -7 4 -13 1412.11 293.322 11
 7 5 -13 68.4038 148.326 10
 -7 -5 -13 -42.1043 166.367 11
 -7 -5 -13 538.661 196.2 10
 -7 -5 -12 1371.46 299.958 11
 -7 -5 -12 1635.81 355.584 10
 -7 -5 -11 4313.4 555.023 11
 -7 -5 -11 4555.74 567.271 10
 -7 -5 -10 5714.62 680.472 11
 -7 -5 -10 4880.94 622.81 10
 -7 -5 -9 4360.63 633.533 11
 -7 5 9 5018.28 480.775 6
 -7 -5 -9 4923.34 647.26 10
 -7 -5 -8 6474.34 787.258 11
 -7 5 8 7144.53 632.182 6
 -7 -5 -8 7158.33 814.448 10
 -7 -5 -7 3385.74 647.097 11
 -7 5 7 4329.88 497.685 6
 -7 -5 -7 2856.94 577.917 10
 -7 -5 -6 11558.3 1087.99 11
 -7 5 6 11114.4 880.909 6
 -7 -5 -6 11070.4 1048.29 10
 -7 5 5 13535.1 1023.97 4
 -7 -5 -5 14576.3 1215.42 11
 -7 -5 -5 13970.3 1192.95 10
 -7 5 5 14849.2 1045.99 6
 -7 5 4 18468.7 1218.33 4
 -7 -5 -4 17889.9 1364.65 11
 -7 -5 -4 16795.8 1341.67 10
 -7 5 4 19936.7 1243.73 6
 -7 5 3 1278.23 373.214 6
 -7 -5 -3 1067.12 446.822 11
 -7 5 3 265.051 307.172 4
 -7 -5 -3 212.721 432.308 10
 -7 5 2 18337.1 1241.56 4
 -7 -5 -2 16852.3 1269.25 11
 -7 -5 -2 18255.9 1404.77 10
 -7 5 2 17198.1 1186.07 6
 -7 5 1 2835.02 489.956 6
 -7 -5 -1 3966.64 586.965 11
 -7 5 1 2919.59 524.36 4
 -7 5 0 26068.6 1569.03 4
 -7 5 0 26534 1526.28 6
 -7 -5 0 28479.2 1544.2 6
 -7 -5 1 2924.22 535.335 6
 -7 5 -1 3430.86 538.651 5
 -7 5 -1 3656.27 555.42 6
 -7 5 -1 2686.69 523.788 4
 -7 5 -2 16457.3 1154.44 5
 -7 5 -2 16852.4 1223.68 4
 -7 5 -2 18089.2 1196.31 6
 -7 -5 2 15248.7 1194.94 6
 -7 5 -3 743.577 285.236 6
 -7 -5 3 433.524 324.197 6
 -7 5 -3 372.788 317.133 5
 -7 5 -3 749.551 386.581 12
 -7 5 -3 202.271 251.205 11
 -7 5 -3 777.462 297.054 4
 -7 5 -4 16084 1135.08 5
 -7 5 -4 15613.1 1197.46 4
 -7 5 -4 16496.4 1148.2 12
 -7 5 -4 17864.8 1295.51 11
 -7 5 -4 18439.4 1149.76 6
 -7 -5 4 17188.9 1286.47 6
 -7 5 -5 14399 1041.32 5
 -7 5 -5 15185.3 1153.22 4
 -7 5 -5 14249.9 1045.32 12
 -7 5 -5 14818 1215.59 11
 -7 -5 5 13891.6 1146.59 6
 -7 5 -6 10838.2 877.555 5
 -7 5 -6 11099.3 957.43 4
 -7 5 -6 10088.8 854.298 12
 -7 5 -6 10300.3 1038.6 11
 -7 -5 6 10547.9 994.166 6
 -7 -5 7 3536.69 586.385 6
 -7 5 -7 2859.73 473.199 5
 -7 5 -7 2888.89 486.586 12
 -7 5 -7 2496.36 557.928 11
 -7 5 -8 6236.64 643.776 5
 -7 5 -8 6517.18 728.024 12
 -7 5 -8 6109.33 762.095 11
 -7 -5 8 6444.85 738.55 6
 -7 5 -9 3988.84 506.087 5
 -7 5 -9 4269.82 673.929 11
 -7 -5 9 4576.23 589.841 6
 -7 5 -10 3559.93 568.184 11
 -7 -5 10 3794.66 508.782 6
 -7 5 -11 2475.57 346.876 3
 -7 5 -11 4920.58 600.125 11
 -7 -5 11 3442.81 431.088 6
 -7 -5 12 1603.08 269.056 6
 -7 5 -12 1571.8 344.924 11
 -7 5 -13 286.798 166.072 11
 -7 -6 -12 1248.91 266.924 11
 -7 -6 -12 1170.98 276.779 10
 -7 -6 -11 164.737 219.972 11
 -7 -6 -11 180.336 230.86 10
 -7 -6 -10 1667.9 377.592 11
 -7 -6 -10 1551.07 405.282 10
 -7 -6 -9 6409.36 719.775 11
 -7 -6 -9 8236.58 771.415 10
 -7 6 8 32.4272 154.993 6
 -7 -6 -8 197.604 278.373 11
 -7 -6 -8 538.429 384.48 10
 -7 6 8 292.656 191.081 4
 -7 -6 -7 3240.45 602.906 11
 -7 6 7 3724.82 457.802 6
 -7 -6 -7 4120.8 625.17 10
 -7 6 7 2752.78 428.071 4
 -7 -6 -6 2755.52 586.887 11
 -7 6 6 4202.03 529.294 6
 -7 6 6 3289.56 454.136 4
 -7 -6 -6 3215.86 595.77 10
 -7 6 5 175.266 231.636 6
 -7 -6 -5 126.828 254.525 11
 -7 6 5 868.769 318.58 4
 -7 -6 -5 402.543 334.838 10
 -7 6 4 92.0558 259.832 6
 -7 -6 -4 287.199 329.075 11
 -7 6 4 -142.745 192.986 4
 -7 -6 -4 -123.204 375.877 10
 -7 6 3 15301.6 1128.52 4
 -7 -6 -3 13995.6 1157.66 11
 -7 6 3 18365.8 1176.34 6
 -7 -6 -3 14964.6 1258.31 10
 -7 6 2 766.821 315.635 6
 -7 -6 -2 -30.7423 227.358 11
 -7 6 2 686.409 336.583 4
 -7 6 1 31.9882 312.79 6
 -7 -6 -1 468.328 275.722 11
 -7 6 1 -5.83277 242.641 4
 -7 6 0 1816.86 411.816 6
 -7 6 0 2262.73 469.87 5
 -7 6 0 2625.17 497.764 4
 -7 6 -1 361.929 292.986 6
 -7 -6 1 761.618 294.281 6
 -7 6 -1 285.857 268.776 5
 -7 6 -1 194.443 313.776 4
 -7 6 -2 384.674 308.559 6
 -7 -6 2 227.262 224.752 6
 -7 6 -2 442.947 302.879 5
 -7 6 -2 396.838 275.671 12
 -7 6 -2 26.5262 244.313 4
 -7 6 -3 12550.4 984.777 5
 -7 6 -3 13266.5 1065.93 4
 -7 6 -3 14702.7 1024.48 12
 -7 6 -3 13406.7 1093.42 11
 -7 -6 3 13649.3 1065.3 6
 -7 -6 4 -65.8088 257.75 6
 -7 6 -4 367.324 305.908 5
 -7 6 -4 358.511 290.845 12
 -7 6 -4 63.2442 203.417 11
 -7 6 -4 20.2645 248.815 4
 -7 -6 5 707.964 318.748 6
 -7 6 -5 115.468 246.083 5
 -7 6 -5 -372.974 276.753 12
 -7 6 -5 -211.547 346.842 11
 -7 6 -5 293.392 300.127 4
 -7 -6 6 3063.75 529.86 6
 -7 6 -6 2935.48 467.474 5
 -7 6 -6 3344.42 493.284 12
 -7 6 -6 1566.11 481.494 11
 -7 6 -6 2703.06 503.664 4
 -7 -6 7 2983.78 525.61 6
 -7 6 -7 3642.32 510.9 5
 -7 6 -7 3418.09 475.589 12
 -7 6 -7 3159.65 589.422 11
 -7 -6 8 183.5 280.162 6
 -7 6 -8 -47.0236 236.375 5
 -7 6 -8 265.478 223.869 12
 -7 6 -8 286.493 293.797 11
 -7 6 -9 7131.3 770.628 11
 -7 -6 9 7008.28 657.079 6
 -7 -6 10 1531.96 327.05 6
 -7 6 -10 1338.7 362.725 11
 -7 -6 11 645.89 221.139 6
 -7 6 -11 -387.677 137.269 3
 -7 6 -11 531.699 261.795 11
 -7 6 -12 1315.6 266.647 11
 -7 -6 12 1565.08 240.278 6
 -7 -7 -11 2495.73 351.914 11
 -7 -7 -11 1645.86 288.319 10
 -7 -7 -10 9038.84 711.169 11
 -7 -7 -10 7977.51 653.246 10
 -7 -7 -9 2372.58 423.048 11
 -7 7 9 2502.49 318.727 4
 -7 -7 -9 2023.61 394.164 10
 -7 7 8 7305.72 602.29 4
 -7 -7 -8 5317.68 640.961 11
 -7 -7 -8 5772.05 635.489 10
 -7 -7 -7 -400.548 320.613 11
 -7 7 7 489.726 202.604 4
 -7 -7 -7 263.374 286.003 10
 -7 7 6 6871.83 662.449 4
 -7 -7 -6 7889.1 806.923 11
 -7 7 6 6713.79 594.953 6
 -7 -7 -6 8548.67 829.508 10
 -7 7 5 1215.58 304.813 6
 -7 -7 -5 1624.17 427.657 11
 -7 -7 -5 1961.59 510.458 10
 -7 7 5 660.85 299.588 4
 -7 7 4 18894.2 1207.32 4
 -7 -7 -4 18982.5 1316.53 11
 -7 7 4 21974.8 1210.97 6
 -7 -7 -3 3466.03 578.508 11
 -7 7 3 3898.62 522.401 6
 -7 7 3 2899.76 499.02 4
 -7 7 2 7664.01 773.15 4
 -7 -7 -2 6546.42 750.986 11
 -7 7 2 8364.86 749.652 6
 -7 7 1 3911.82 554.231 5
 -7 7 1 4311.88 550.608 6
 -7 7 1 3509.37 556.553 4
 -7 7 0 20211.8 1249.73 5
 -7 7 0 23250.4 1392.35 4
 -7 7 -1 3239.13 534.376 5
 -7 7 -1 3718.6 573.323 4
 -7 7 -1 3524.05 498.718 12
 -7 7 -2 8192.99 748.771 5
 -7 7 -2 7621.62 792.373 4
 -7 7 -2 7177.71 687.291 12
 -7 -7 2 6302.72 662.687 6
 -7 7 -3 3347.26 498.59 5
 -7 7 -3 2985.16 456.196 12
 -7 7 -3 3236.3 526.309 11
 -7 7 -3 3171.79 536.777 4
 -7 -7 3 3334.73 489.269 6
 -7 7 -4 20710.7 1191.11 5
 -7 7 -4 19076.7 1257.52 4
 -7 7 -4 19694.8 1142.93 12
 -7 7 -4 19790.7 1305.1 11
 -7 -7 4 20911.8 1279.92 6
 -7 -7 5 1513.2 371.572 6
 -7 7 -5 1721.73 377.427 5
 -7 7 -5 928.677 293.544 12
 -7 7 -5 2190.26 470.932 11
 -7 7 -5 1656.43 384.41 4
 -7 7 -6 8175.19 702.905 5
 -7 7 -6 8525.92 773.742 4
 -7 7 -6 7780.37 664.622 12
 -7 7 -6 6766.98 771.216 11
 -7 -7 6 8184.41 754.53 6
 -7 -7 7 666.677 269.037 6
 -7 7 -7 346.281 236.924 5
 -7 7 -7 296.76 222.262 12
 -7 7 -7 -193.757 291.734 11
 -7 7 -8 4548.03 523.37 5
 -7 7 -8 4928.72 635.195 11
 -7 -7 8 7023.34 636.039 6
 -7 7 -9 2599.81 439.199 11
 -7 -7 9 2408.52 360.357 6
 -7 7 -10 10259.3 752.65 11
 -7 -7 10 7154.03 559.055 6
 -7 7 -11 2188.89 334.395 11
 -7 -7 11 1857.79 256.876 6
 -7 8 8 4341.28 411.672 4
 -7 -8 -8 4379.9 519.619 11
 -7 -8 -7 118.328 267.787 11
 -7 8 7 114.498 161.277 4
 -7 8 6 4041.8 472.078 4
 -7 -8 -6 4401.77 587.99 11
 -7 -8 -5 1505.88 429.989 11
 -7 8 5 1507.94 324.45 4
 -7 8 4 2950.64 440.501 4
 -7 8 3 -185.594 217.02 4
 -7 8 2 6030.03 614.009 5
 -7 8 2 6593.48 678.008 4
 -7 8 1 1701.04 366.344 5
 -7 8 1 1161.6 365.882 4
 -7 8 0 7749.24 698.063 5
 -7 8 0 9074.47 804.967 4
 -7 8 0 8458.39 690.756 12
 -7 8 -1 1420.34 330.174 5
 -7 8 -1 1149.56 306.316 12
 -7 8 -1 756.369 305.804 4
 -7 8 -2 5622.9 578.359 5
 -7 8 -2 5252.63 619.382 4
 -7 8 -2 5022.83 523.801 12
 -7 -8 3 70.3797 158.68 6
 -7 8 -3 59.322 226.867 5
 -7 8 -3 390.439 226.362 12
 -7 8 -3 169.152 185.167 11
 -7 8 -3 38.5191 208.585 4
 -7 -8 4 2884.38 415.158 6
 -7 8 -4 2126.33 375.3 5
 -7 8 -4 2144.74 360.788 12
 -7 8 -4 2124.83 358.759 11
 -7 8 -4 1641.18 381.305 4
 -7 -8 5 1525.63 320.898 6
 -7 8 -5 1181.52 309.71 5
 -7 8 -5 852.589 263.088 12
 -7 8 -5 825.312 350.109 11
 -7 8 -5 1116.95 328.088 4
 -7 8 -6 4743.55 497.569 5
 -7 8 -6 4980.36 471.162 12
 -7 8 -6 5288.52 593.524 11
 -7 -8 6 5082.1 535.548 6
 -7 -8 7 -30.5433 153.523 6
 -7 8 -7 110.378 179.21 5
 -7 8 -7 443.067 259.588 11
 -7 8 -8 3796.86 478.96 11
 -7 -8 8 3337.62 393.549 6
 -7 -8 9 227.178 159.856 6
 -7 8 -9 -69.8559 169.807 11
 -7 8 -10 4661.89 432.164 11
 -7 -8 10 5116.41 389.278 6
 -7 9 8 653.838 149.666 5
 -7 9 7 7361.59 500.386 5
 -7 9 7 8276.07 540.541 4
 -7 9 6 4033.23 388.772 5
 -7 9 6 3720.77 398.482 4
 -7 9 5 4497.51 438.428 5
 -7 9 5 5110.97 494.673 4
 -7 9 4 730.616 247.995 5
 -7 9 4 639.063 216.508 12
 -7 9 4 760.678 265.954 4
 -7 9 3 6167.92 533.413 5
 -7 9 3 6703.15 599.595 4
 -7 9 3 5344.88 455.31 12
 -7 9 2 4278.99 449.568 5
 -7 9 2 4725.07 533.186 4
 -7 9 2 4008.64 405.84 12
 -7 9 1 14057.2 860.999 5
 -7 9 1 15213.8 971.557 4
 -7 9 1 13995.7 787.282 12
 -7 9 0 -100.936 198.843 5
 -7 9 0 116.163 153.558 12
 -7 9 0 111.47 216.627 4
 -7 9 -1 13780.9 851.154 5
 -7 9 -1 15880.7 992.951 4
 -7 9 -1 13785 779.339 12
 -7 9 -2 4119.21 448.449 5
 -7 9 -2 4589.3 520.866 4
 -7 9 -2 3638.14 387.845 12
 -7 9 -3 5507.29 504.478 5
 -7 9 -3 5646.38 578.2 4
 -7 9 -3 5228.86 451.268 12
 -7 -9 4 508.898 160.816 6
 -7 9 -4 222.285 186.708 5
 -7 9 -4 177.064 170.974 12
 -7 9 -4 152.574 173.806 11
 -7 9 -4 520.737 219.306 4
 -7 9 -5 5959.94 487.487 5
 -7 9 -5 6196.01 567.754 4
 -7 9 -5 4813.89 500.485 11
 -7 -9 5 3984.78 392.842 6
 -7 9 -6 3938.4 392.02 5
 -7 9 -6 3033.79 410.655 11
 -7 -9 6 2931.13 339.375 6
 -7 9 -7 6698.42 536.705 11
 -7 -9 7 6409.03 467.795 6
 -7 10 5 7455.9 508.601 4
 -7 10 4 2249.26 262.341 5
 -7 10 4 2314.15 302.914 4
 -7 10 3 8892.75 541.543 5
 -7 10 3 8186.96 586.419 4
 -7 10 2 936.782 213.383 5
 -7 10 2 1055.94 231.294 4
 -7 10 1 1799.4 267.155 5
 -7 10 1 2093.16 322.431 4
 -7 10 0 1148.31 234.901 5
 -7 10 0 1318.94 279.278 4
 -7 10 -1 1860.38 267.405 5
 -7 10 -1 1936.45 332.41 4
 -7 10 -2 939.51 210.464 5
 -7 10 -2 569.119 227.526 4
 -7 10 -3 9799.1 578.288 5
 -7 10 -3 9172.91 644.886 4
 -7 10 -4 2135.13 268.848 5
 -7 10 -4 2262.05 315.825 4
 -7 10 -5 7987.02 480.732 5
 -8 0 0 -125.701 239.72 6
 -8 0 -1 5482 582.673 12
 -8 0 -1 4605.48 537.665 6
 -8 0 1 4057.85 568.933 6
 -8 0 -2 121.538 183.892 6
 -8 0 2 86.507 265.53 6
 -8 0 -2 -10.6662 217.934 12
 -8 0 -3 589.293 227.653 6
 -8 0 3 523.801 322.679 6
 -8 0 -3 459.116 247.141 12
 -8 0 -4 9190.34 725.398 12
 -8 0 -4 7887.94 775.434 11
 -8 0 4 8350.92 810.391 6
 -8 0 -5 12035.4 822.36 12
 -8 0 -5 11905.7 952.355 11
 -8 0 5 13133.5 1002.22 6
 -8 0 6 1244.95 335.459 6
 -8 0 -6 1381.63 310.674 12
 -8 0 -6 1053.27 392.327 11
 -8 0 7 1031.4 299.121 6
 -8 0 -7 894.314 341.105 11
 -8 0 8 282.502 251.319 6
 -8 0 -8 350.202 284.826 11
 -8 0 -9 35845.9 1704.29 11
 -8 0 9 30998.1 1459.65 6
 -8 0 -10 7071.71 678.798 11
 -8 0 10 5738.02 508.857 6
 -8 0 11 1370.47 231.647 6
 -8 0 -11 1226.26 306.974 11
 -8 0 -12 777.065 227.58 11
 -8 -1 -12 2037.32 304.509 11
 -8 -1 -11 2933.76 678.849 11
 -8 1 11 3101.8 305.321 6
 -8 -1 -10 2451.19 428.668 11
 -8 1 10 2339.91 305.826 6
 -8 -1 -9 3162.2 476.915 11
 -8 -1 -9 1449.5 332.456 10
 -8 1 9 2930.9 396.164 6
 -8 1 8 1771.56 349.735 6
 -8 -1 -8 2116.97 435.655 11
 -8 -1 -8 1141.33 356.456 10
 -8 1 7 1327.59 357.118 6
 -8 -1 -7 1120.5 394.275 11
 -8 -1 -7 935.6 345.156 10
 -8 -1 -6 5273.1 676.984 11
 -8 1 6 6856.38 778.084 6
 -8 1 5 3289.97 497.272 6
 -8 -1 -5 2799.18 492.586 11
 -8 -1 -4 24872.7 1447.3 11
 -8 1 4 25626.3 1452.14 6
 -8 1 3 277.733 285.224 6
 -8 -1 -3 93.0653 244.374 11
 -8 1 2 3166.95 514.396 6
 -8 -1 -2 3396.43 452.627 6
 -8 1 1 7758.97 733.505 6
 -8 -1 -1 8768.13 744.929 6
 -8 1 0 9548.39 820.249 6
 -8 -1 0 10322.6 849.199 6
 -8 1 -1 7420.3 726.016 12
 -8 1 -1 8146.27 713.907 6
 -8 -1 1 6813.37 711.091 6
 -8 1 -2 3320.25 483.018 12
 -8 1 -2 3299.19 455.265 6
 -8 -1 2 3001.39 500.665 6
 -8 1 -3 500.553 208.007 6
 -8 -1 3 83.3254 295.901 6
 -8 1 -3 973.57 333.57 12
 -8 1 -4 25040.6 1331.1 12
 -8 1 -4 23701 1398.85 11
 -8 -1 4 22735.8 1390.61 6
 -8 -1 5 2678.66 466.937 6
 -8 1 -5 2230.02 422.603 12
 -8 1 -5 3041.73 495.414 11
 -8 1 -6 5344.43 570.504 12
 -8 1 -6 5420.21 664.876 11
 -8 -1 6 5747.46 667.254 6
 -8 -1 7 966.009 328.3 6
 -8 1 -7 1222.78 367.818 11
 -8 -1 8 1428.16 325.54 6
 -8 1 -8 2051.48 453.305 11
 -8 -1 9 2414.64 364.372 6
 -8 1 -9 2578.08 453.236 11
 -8 1 -10 1779.72 375.534 11
 -8 -1 10 2277.08 327.11 6
 -8 1 -11 3266.35 445.382 11
 -8 -1 11 3438.84 353.667 6
 -8 1 -12 1457.01 270.703 11
 -8 -2 -12 5309.28 459.907 11
 -8 -2 -11 4516.52 491.25 11
 -8 -2 -10 22099.4 1176.63 11
 -8 -2 -10 13474.3 943.134 10
 -8 2 10 22762 966.387 6
 -8 -2 -9 13016.4 931.234 11
 -8 -2 -9 9917.65 813.894 10
 -8 2 9 12653.8 763.814 6
 -8 2 8 1927.43 339.702 6
 -8 -2 -8 2373.8 442.934 11
 -8 -2 -8 2269.35 442.779 10
 -8 -2 -7 5388.77 630.293 11
 -8 -2 -7 5279.21 629.373 10
 -8 2 7 5853.54 593.012 6
 -8 -2 -6 5950.73 693.694 11
 -8 -2 -6 5826.34 718.331 10
 -8 2 6 7261.8 688.351 6
 -8 2 5 2594.54 448.555 6
 -8 -2 -5 2568.19 462.836 11
 -8 2 4 2786.67 479.049 6
 -8 -2 -4 3637.36 535.036 11
 -8 -2 -3 10690.7 894.141 11
 -8 2 3 11650.2 923.797 6
 -8 2 2 464.86 292 6
 -8 2 2 100.195 210.778 5
 -8 2 1 1092.38 323.236 6
 -8 -2 -1 1826.65 359.629 6
 -8 2 1 1479.61 330.936 5
 -8 2 0 18.8888 241.591 6
 -8 -2 0 219.847 236.311 6
 -8 2 0 100.242 228.501 5
 -8 2 -1 2002.46 393.188 6
 -8 -2 1 1692.82 387.905 6
 -8 2 -1 1644.28 360.294 5
 -8 2 -1 2380.71 456.059 12
 -8 2 -2 710.704 272.361 6
 -8 -2 2 1120.87 348.73 6
 -8 2 -2 1866.03 334.559 5
 -8 2 -2 434.704 313.517 12
 -8 2 -3 12370.2 830.98 5
 -8 2 -3 10843.1 879.666 12
 -8 2 -3 12276.8 869.126 6
 -8 -2 3 12822.7 996.174 6
 -8 -2 4 2900.19 503.022 6
 -8 2 -4 3046.71 474.592 12
 -8 2 -4 4045.95 440.163 6
 -8 2 -4 3301.56 486.611 11
 -8 -2 5 1922.71 421.762 6
 -8 2 -5 2083.66 397.107 12
 -8 2 -5 1591.2 379.969 11
 -8 2 -6 5244.37 564.058 12
 -8 2 -6 5429.92 655.758 11
 -8 -2 6 6552.75 683.079 6
 -8 2 -7 5482.92 572.322 12
 -8 2 -7 5285.45 657.415 11
 -8 -2 7 6050.11 646.815 6
 -8 -2 8 2562.76 416.899 6
 -8 2 -8 2176.06 447.829 11
 -8 2 -9 13262.3 957.914 11
 -8 -2 9 12551.7 834.064 6
 -8 2 -10 21919.3 1206.11 11
 -8 -2 10 20132.4 1021.69 6
 -8 2 -11 3703.33 439.534 11
 -8 -2 11 4506.57 384.711 6
 -8 2 -12 5115.12 447.272 11
 -8 -3 -11 2277.44 350.444 11
 -8 -3 -10 9530.36 716.568 11
 -8 3 10 8526.04 521.156 6
 -8 -3 -10 6144.39 581.705 10
 -8 -3 -9 10373.4 813.3 11
 -8 -3 -9 8634.2 770.487 10
 -8 3 9 11061.5 670.946 6
 -8 -3 -8 7726.23 726.89 11
 -8 -3 -8 6600.58 677.948 10
 -8 3 8 6531.54 554.982 6
 -8 -3 -7 10027.8 862.151 11
 -8 -3 -7 9977.09 868.19 10
 -8 3 7 9770.24 734.194 6
 -8 -3 -6 14186.6 1070.09 11
 -8 -3 -6 16061.6 1143.91 10
 -8 3 6 17912.2 1052.58 6
 -8 -3 -5 19384 1262.64 11
 -8 3 5 23584.1 1271.04 6
 -8 3 4 1586.08 379.201 6
 -8 -3 -4 2218.27 418.876 11
 -8 -3 -3 13592.8 1026.11 11
 -8 3 3 17016.8 1089.51 6
 -8 3 2 4113.56 530.555 5
 -8 3 2 5263.61 607.964 6
 -8 3 1 34909.8 1674.85 5
 -8 3 1 36653.7 1731.88 6
 -8 3 0 1830.41 379.978 6
 -8 -3 0 2675.19 425.911 6
 -8 3 0 2739.37 452.871 5
 -8 3 -1 33966 1617.61 5
 -8 3 -1 32367.2 1663.27 12
 -8 3 -1 35489.3 1657.48 6
 -8 -3 1 34348 1677.14 6
 -8 3 -2 4026.44 501.891 5
 -8 3 -2 4675.24 596.831 12
 -8 3 -2 5164.49 570.097 6
 -8 -3 2 4136.44 558.263 6
 -8 3 -3 16278.2 1010.85 5
 -8 3 -3 16103.4 1077.96 12
 -8 3 -3 17383.9 1030.94 6
 -8 -3 3 16400.5 1119.31 6
 -8 -3 4 1749.43 405.098 6
 -8 3 -4 1227.58 346.029 5
 -8 3 -4 1624.56 391.311 12
 -8 3 -4 1108.74 266.114 6
 -8 3 -4 1482.82 376.591 11
 -8 3 -5 18901.4 1062.29 5
 -8 3 -5 20092.2 1162.78 12
 -8 3 -5 17023.6 1145.36 11
 -8 -3 5 20525.2 1246.2 6
 -8 3 -6 13100.5 848.748 5
 -8 3 -6 15217.1 974.165 12
 -8 3 -6 14154.5 1031.86 11
 -8 -3 6 15553.6 1045.3 6
 -8 3 -7 11091.4 790.801 12
 -8 3 -7 9955.09 856.109 11
 -8 -3 7 10271.2 815.189 6
 -8 3 -8 7487.36 719.967 11
 -8 -3 8 7307.95 645.385 6
 -8 3 -9 9365.28 790.062 11
 -8 -3 9 10572.5 733.409 6
 -8 3 -10 9105.69 711.907 11
 -8 -3 10 7355.15 557.961 6
 -8 -3 11 942.483 194.636 6
 -8 3 -11 1331.02 275.959 11
 -8 -4 -11 1143.21 237.429 11
 -8 -4 -10 159.839 184.616 11
 -8 -4 -10 405.768 224.923 10
 -8 -4 -9 4195.91 504.841 11
 -8 4 9 4794.63 406.21 6
 -8 -4 -9 4893.66 543.186 10
 -8 4 8 621.808 195.753 6
 -8 -4 -8 215.377 228.855 11
 -8 -4 -8 768.793 343.553 10
 -8 -4 -7 3453.45 496.981 11
 -8 -4 -7 2898.16 482.032 10
 -8 4 7 2793.54 383.817 6
 -8 -4 -6 11257.4 899.441 11
 -8 4 6 12011.2 820.287 6
 -8 -4 -5 6787.01 692.097 11
 -8 4 5 7149.54 641.26 6
 -8 4 4 1344.16 322.126 6
 -8 -4 -4 1082.16 353.981 11
 -8 -4 -3 10582.4 866.758 11
 -8 4 3 13324.5 919.512 6
 -8 4 2 4974.37 551.495 5
 -8 4 2 4579.37 567.639 6
 -8 4 1 8417.42 745.837 5
 -8 4 1 8999.52 771.382 6
 -8 4 0 475.574 249.109 6
 -8 4 0 -106.217 239.423 5
 -8 4 -1 8979.39 758.771 5
 -8 4 -1 9097.88 794.3 12
 -8 4 -1 10250.9 797.713 6
 -8 -4 1 7606.8 689.499 6
 -8 4 -2 4213.59 520.823 5
 -8 4 -2 4362.93 575.106 12
 -8 4 -2 4762.69 532.712 6
 -8 -4 2 4110.04 526.407 6
 -8 4 -3 11092.3 823.941 5
 -8 4 -3 11176 873.299 12
 -8 4 -3 11657.4 817.517 6
 -8 -4 3 11948.8 903.073 6
 -8 -4 4 960.083 321.252 6
 -8 4 -4 1312.84 312.499 5
 -8 4 -4 1472.24 358.906 12
 -8 4 -4 856.008 314.871 11
 -8 4 -5 6297.8 581.28 5
 -8 4 -5 7054.01 648.182 12
 -8 4 -5 6593.74 665.32 11
 -8 -4 5 6758.05 669.149 6
 -8 4 -6 10561.5 741.19 5
 -8 4 -6 10700.3 794.029 12
 -8 4 -6 10878.6 884.477 11
 -8 -4 6 12108.4 875.748 6
 -8 4 -7 3171.24 410.193 5
 -8 4 -7 3128.42 424.465 12
 -8 4 -7 2447.52 416.905 11
 -8 -4 7 3388.41 450.672 6
 -8 -4 8 590.267 246.521 6
 -8 4 -8 60.3333 244.471 11
 -8 4 -9 4646.77 543.175 11
 -8 -4 9 4821.07 467.333 6
 -8 -4 10 -78.3382 128.037 6
 -8 4 -10 428.239 206.464 11
 -8 4 -11 1037.04 224.588 11
 -8 -5 -10 689.541 234.437 11
 -8 -5 -9 8036.5 630.563 11
 -8 -5 -8 4837.28 565.845 11
 -8 5 8 5915.37 445.129 6
 -8 -5 -7 2840.97 449.927 11
 -8 5 7 2386.08 331.495 6
 -8 5 6 2223.9 346.619 6
 -8 -5 -6 1409.35 348.75 11
 -8 -5 -5 13689.9 976.361 11
 -8 5 5 16753.1 972.847 6
 -8 -5 -4 3663.3 482.421 11
 -8 5 4 5140.03 542.236 6
 -8 -5 -3 1524.87 363.044 11
 -8 5 3 3062.52 433.79 6
 -8 5 2 580.533 272.751 6
 -8 5 2 810.443 331.128 5
 -8 5 1 2334.1 407.562 6
 -8 5 1 1714.88 382.397 5
 -8 5 0 121.479 223.782 6
 -8 5 0 58.7107 245.57 5
 -8 5 -1 1394.3 334.486 6
 -8 -5 1 1170.37 292.613 6
 -8 5 -1 1144.63 319.754 5
 -8 5 -1 1366.71 348.632 12
 -8 -5 2 857.231 278.182 6
 -8 5 -2 516.571 257.596 5
 -8 5 -2 470.262 276.061 12
 -8 5 -2 530.524 251.995 6
 -8 -5 3 1516.34 359.488 6
 -8 5 -3 1695.75 348.23 5
 -8 5 -3 2432.28 400.77 12
 -8 5 -4 3982.99 489.856 5
 -8 5 -4 4850.62 528.104 12
 -8 -5 4 4617.76 538.439 6
 -8 5 -5 14060.5 892.904 5
 -8 5 -5 15399.3 934.825 12
 -8 5 -5 13843.5 933.745 11
 -8 -5 5 15604.5 991.783 6
 -8 -5 6 2670.17 414.413 6
 -8 5 -6 1127.13 288.29 5
 -8 5 -6 1576.61 331.124 12
 -8 5 -6 1836.94 343.923 11
 -8 -5 7 2075.4 356.011 6
 -8 5 -7 2205.45 342.834 5
 -8 5 -7 2221.87 346.407 12
 -8 5 -7 2155.68 384.254 11
 -8 5 -8 4544.36 487.522 11
 -8 -5 8 4909.3 465.891 6
 -8 5 -9 8956.14 662.202 11
 -8 -5 9 8757.59 579.699 6
 -8 -5 10 902.911 177.447 6
 -8 5 -10 764.424 191.95 11
 -8 -6 -9 1886.67 289.439 11
 -8 -6 -8 4566.78 466.879 11
 -8 -6 -7 4135.33 476.081 11
 -8 -6 -6 2250.01 381.936 11
 -8 6 6 2087 299.979 6
 -8 -6 -5 10224.1 765.463 11
 -8 6 5 9411.88 661.539 6
 -8 6 4 4964.89 506.415 5
 -8 -6 -4 2467.09 405.97 11
 -8 6 4 4060.57 444.013 6
 -8 6 3 12790.8 848.854 5
 -8 6 3 13374.7 853.484 6
 -8 6 2 9212.35 721.267 5
 -8 6 2 8122.31 674.913 6
 -8 6 1 5552.54 580.65 5
 -8 6 1 6540.63 590.447 6
 -8 6 0 4948 536.663 5
 -8 6 0 5715.6 579.154 12
 -8 6 -1 5126.25 537.726 5
 -8 6 -1 5608.51 558.277 12
 -8 6 -2 9426.94 714.178 5
 -8 6 -2 9266.32 707.694 12
 -8 -6 2 7470.31 599.065 6
 -8 6 -3 11364 774.781 5
 -8 6 -3 10240.9 732.487 12
 -8 -6 3 10837.6 734.881 6
 -8 6 -4 4127.58 458.749 5
 -8 6 -4 3760.78 438.832 12
 -8 -6 4 3521.42 423.604 6
 -8 6 -5 11170.4 731.268 5
 -8 6 -5 10890.3 718.946 12
 -8 6 -5 9147.04 678.42 11
 -8 -6 5 8988.66 678.441 6
 -8 6 -6 2355.03 332.755 5
 -8 6 -6 2110.48 337.691 12
 -8 6 -6 1329.36 306.796 11
 -8 -6 6 2130.25 331.572 6
 -8 6 -7 4048.21 456.411 11
 -8 -6 7 4808.31 438.541 6
 -8 6 -8 4097.52 421.143 11
 -8 -6 8 4212.62 381.985 6
 -8 -6 9 1965.95 228.506 6
 -8 7 7 19163 857.551 5
 -8 7 6 2802.84 319.767 5
 -8 7 5 4200.65 426.631 5
 -8 7 4 3124.46 382.063 5
 -8 7 3 4633.42 458.556 5
 -8 7 2 4778.23 484.921 5
 -8 7 2 4363.67 461.002 12
 -8 7 1 1415.09 300.173 5
 -8 7 1 858.029 244.076 12
 -8 7 0 1759.36 318.142 5
 -8 7 0 1529.27 298.516 12
 -8 7 0 1315.49 292.55 4
 -8 7 -1 1398.11 292.51 5
 -8 7 -1 1787.48 309.814 12
 -8 7 -1 1359.44 304.157 4
 -8 7 -2 5455.88 501.308 5
 -8 7 -2 4488.38 456.938 4
 -8 7 -2 4731.7 465.139 12
 -8 7 -3 3974.09 426.422 5
 -8 7 -3 3882.87 413.761 12
 -8 -7 4 2177.57 273.087 6
 -8 7 -4 2212.51 325.741 5
 -8 7 -4 2886.87 351.657 12
 -8 7 -5 3378.14 379.287 5
 -8 7 -5 4044.46 392.987 12
 -8 -7 5 3737.8 349.164 6
 -8 7 -6 1670.7 260.278 5
 -8 -7 6 2185.17 259.969 6
 -8 8 5 11431 599.837 5
 -8 8 4 1403.07 237.413 5
 -8 8 4 796.304 186.908 12
 -8 8 3 1230.3 225.51 5
 -8 8 3 1304.58 220.806 12
 -8 8 2 444.6 180.507 5
 -8 8 2 165.14 169.358 12
 -8 8 1 3315.34 359.904 5
 -8 8 1 3801.12 358.656 12
 -8 8 0 754.855 205.097 5
 -8 8 0 693.707 187.081 12
 -8 8 0 430.865 179.663 4
 -8 8 -1 3683.85 375.844 5
 -8 8 -1 3039.77 344.168 4
 -8 8 -1 4506.75 375.91 12
 -8 8 -2 429.808 201.126 5
 -8 8 -2 555.212 180.698 12
 -8 8 -3 796.617 197.167 5
 -8 8 -3 484.173 163.881 12
 -8 8 -4 831.12 192.704 5
 -8 8 -5 10833.8 591.831 5
 -9 0 0 -82.225 158.942 6
 -9 0 -1 1277.31 268.311 6
 -9 0 1 1867.03 312.902 6
 -9 0 2 8375.43 646.306 6
 -9 0 3 118.446 162.054 6
 -9 0 4 507.405 216.107 6
 -9 0 5 2979.07 370.44 6
 -9 0 6 4310.26 420.712 6
 -9 0 7 -149.035 134.851 6
 -9 0 8 -20.3295 117.986 6
 -9 1 8 1368.57 201.995 6
 -9 1 7 1721.16 248.46 6
 -9 1 6 698.26 209.229 6
 -9 1 5 5257.42 415.267 12
 -9 1 5 6555.56 527.428 6
 -9 1 4 1727.45 295.32 6
 -9 1 4 1112.96 215.219 12
 -9 1 3 1790.56 313.193 6
 -9 1 3 1481.92 262.68 12
 -9 1 2 6703.2 533.397 12
 -9 1 2 7404.46 603.163 6
 -9 1 1 3065.69 383.969 12
 -9 1 1 3759.37 421.631 6
 -9 1 0 542.944 206.902 6
 -9 -1 0 338.782 162.053 6
 -9 1 0 35.8166 222.663 12
 -9 1 -1 2486.43 342.905 12
 -9 1 -1 2962.79 362.762 6
 -9 -1 1 3482.7 397.871 6
 -9 1 -2 6596.43 524.078 12
 -9 1 -2 7906.13 532.17 6
 -9 -1 2 6107 538.673 6
 -9 -1 3 1239.09 254.525 6
 -9 1 -3 825.499 239.502 12
 -9 -1 4 1784.44 306.884 6
 -9 1 -4 1731.46 259.649 12
 -9 -1 5 6761.34 551.009 6
 -9 -1 6 718.876 201.366 6
 -9 -1 7 1972.34 274.11 6
 -9 -1 8 1719.87 219.112 6
 -9 2 7 -68.942 124.929 6
 -9 2 6 948.26 203.446 6
 -9 2 5 10019.7 652.64 6
 -9 2 4 876.586 246.309 6
 -9 2 4 452.909 183.515 12
 -9 2 3 2088.24 332.498 6
 -9 2 3 2188.06 316.024 12
 -9 2 2 3109.75 400.581 12
 -9 2 2 4032.88 440.231 6
 -9 2 1 10324.7 722.957 12
 -9 2 1 12478.8 778.092 6
 -9 2 0 2970.4 403.112 12
 -9 2 0 3629.22 414.084 6
 -9 2 -1 9541.05 681.615 12
 -9 2 -1 10899.5 685.646 6
 -9 -2 1 9769.79 654.504 6
 -9 2 -2 3185.83 393.834 12
 -9 2 -2 3141.54 347.832 6
 -9 -2 2 3413.14 397.933 6
 -9 -2 3 2019.34 310.112 6
 -9 2 -3 2762.5 360.049 12
 -9 -2 4 766.269 224.002 6
 -9 2 -4 546.181 200.631 12
 -9 -2 5 9593.1 639.306 6
 -9 -2 6 750.516 195.146 6
 -9 -2 7 -15.5918 110.665 6
 -9 3 7 7768.43 470.232 6
 -9 3 6 3092.32 317.168 6
 -9 3 5 1025.74 228.223 6
 -9 3 4 2699.98 330.348 12
 -9 3 4 2365.1 328.918 6
 -9 3 3 4080.26 423.973 12
 -9 3 3 4696.62 454.884 6
 -9 3 2 3576.94 409.233 12
 -9 3 2 3865.44 418.606 6
 -9 3 1 7220.29 581.145 12
 -9 3 1 7682.27 587.139 6
 -9 3 0 9002.74 657.134 12
 -9 3 0 10124.5 668.416 6
 -9 3 -1 7717.65 588.702 12
 -9 3 -1 7151.39 536.55 6
 -9 3 -2 3930.58 417.442 12
 -9 -3 2 3109.57 346.465 6
 -9 3 -3 3544.09 406.683 12
 -9 -3 3 4389.84 407.82 6
 -9 3 -4 2493.24 336.663 12
 -9 -3 4 3090.65 344.966 6
 -9 -3 5 825.154 187.901 6
 -9 -3 6 3426.6 342.457 6
 -9 -3 7 7877.18 478.371 6
 -9 4 6 2222.84 245.948 6
 -9 4 5 7206.93 490.073 12
 -9 4 5 7965.36 507.07 6
 -9 4 4 629.022 188.44 6
 -9 4 4 408.097 162.924 12
 -9 4 3 3883.31 388.612 12
 -9 4 3 4207.23 402.448 6
 -9 4 2 1140.53 231.738 6
 -9 4 2 851.719 223.323 12
 -9 4 1 1530.06 258.701 6
 -9 4 1 1732.82 236.408 5
 -9 4 1 1214.23 273.032 12
 -9 4 0 751.638 174.35 5
 -9 4 0 831.598 254.774 12
 -9 4 -1 1126.45 258.229 12
 -9 4 -2 651.277 232.966 12
 -9 4 -3 3899.34 394.853 12
 -9 -4 3 3290.91 318.489 6
 -9 -4 4 -159.966 89.3565 6
 -9 4 -4 175.855 162.227 12
 -9 -4 5 6053.28 416.096 6
 -9 5 4 2585.02 286.057 12
 -9 5 3 871.05 201.56 12
 -9 5 2 24813.9 1075 12
 -9 5 1 12466.9 704.674 12
 -9 5 0 786.279 222.437 12
 -9 5 -1 12966.4 712.325 12
 -9 5 -2 26123.1 1102.91 12
 -9 5 -3 618.685 185.957 12
 -9 5 -4 2249.66 276.106 12
 -9 6 1 8243.42 491.052 12
 -9 6 0 15854.2 730.839 12
 -9 6 -1 7405.16 457.647 12
